# Supplementary material for: Transition metal catalysed C7 and ortho-selective halogenation of 2-arylbenzo[d]oxazoles
Source: Royal Society of Chemistry journal article supplement (doi:10.1039/c9qo00429g), 2019-01-01
Supplement: c9qo00429g1.pdf [file c9qo00429g1.pdf]

# Supporting Information

## Transition metal catalysed C7- and *ortho*-selective halogenation of 2-arylbenzo[d]oxazoles

Xi Hong, Quan Zhou, Shuang Huang, He-Zhen Cui, Zhi-Ming Li\* and Xiu-Feng Hou\*

Department of Chemistry, Fudan University, Shanghai 200433, P. R. China

E-mail address: [xfhou@fudan.edu.cn](mailto:xfhou@fudan.edu.cn) (X.-F. Hou); [zmli@fudan.edu.cn](mailto:zmli@fudan.edu.cn) (Z.-M. Li)

### Table of Contents

|                                          |      |
|------------------------------------------|------|
| 1. General information .....             | S2   |
| 2. Experiment Procedure .....            | S2   |
| 3. Analytical Data of the Products ..... | S5   |
| 4. Crystallographic Data .....           | S37  |
| 5. Theoretical Calculations .....        | S38  |
| 6. NMR Spectra of products .....         | S67  |
| 7. References .....                      | S139 |

## 1. General Information

Chemicals and solvents were purchased from commercial suppliers and used as received.  $^1\text{H}$  NMR,  $^{13}\text{C}$  NMR, and  $^{19}\text{F}$  spectra were recorded on a Bruker AVANCE III HD (400 MHz) spectrometer. Chemical shifts were calibrated using residual undeuterated solvent as an internal reference ( $\text{CDCl}_3$ : 7.26 ppm  $^1\text{H}$  NMR, 77.0 ppm  $^{13}\text{C}$  NMR). Multiplicity was indicated as follows: s (singlet), d (doublet), t (triplet), q (quartet), m (multiplet), dd (doublet of doublet), brs (broad singlet). All high-resolution mass spectra (HRMS) were obtained on a Bruker McriOTOF11 spectrometer. All GC analyses was performed on PE680-ST8 GC-MS.

Single crystal X-ray diffraction data for compounds were collected on a Bruker D8 VENTURE-MetalJet diffractometer equipped with a PHOTON II area detector and HELIOS multilayer optics monochromated Ga-K alpha radiation ( $\lambda = 1.34138 \text{ \AA}$ ). The data reduction was performed using the APEX III software. Structure were solved by direct methods and refined by full-matrix least-squares methods based on F2 using the SHELXL-2014 software. If not noted hydrogen atoms were positioned geometrically in idealized positions and refined with isotropic displacement parameters as riding atoms. If not noted otherwise all non-hydrogen atoms were refined anisotropically. Geometrical calculations were performed using the SHELXL-2014 programs.

## 2. Experiment Procedure

### 2-1 General Halogenation Reactions

A 25 mL Schlenk tube was charged with 2-arylbenzoxazole **1** (0.5 mmol), N-halosuccinimide (chloro-, bromo-, or iodo-) (0.6 mmol),  $[\text{RhCp}^*(\text{MeCN})_3](\text{SbF}_6)_2$  (16.7 mg, 4 mol%), and 1,2-dichloroethane (DCE). Then the reaction mixture was degassed and charged with  $\text{N}_2$  at the temperature of liquid nitrogen. Then the reaction mixture was warmed gradually to room temperature and was stirred at 60 °C for 18 hours. The solvent was removed on a rotary evaporator under reduced pressure and the residue was subjected to column chromatography isolation on silica gel with petroleum ether / ethyl acetate (50:1-10:1) to afford the pure product.

## 2-2 KIE Study for *ortho*-Bromination

### a) Preparation Procedure of Isotope Labeled Substrates

A 25 mL Schlenk tube was charged with 5-methyl-2-(*o*-tolyl)benzo[*d*]oxazole **1a** (223.3 mg, 1 mmol), CD<sub>3</sub>COOD (0.5 mL), [RhCp\*(MeCN)<sub>3</sub>](SbF<sub>6</sub>)<sub>2</sub> (16.7 mg, 4 mol%), and 1,2-dichloroethane (DCE). The reaction mixture was degassed and charged with N<sub>2</sub> in the temperature of liquid nitrogen. Then the reaction mixture was warmed gradually to room temperature and was stirred at 60 °C for 18 hours. The solvent was removed on a rotary evaporator under reduced pressure and the residue was subjected to column chromatography isolation on silica gel with petroleum ether / ethyl acetate (50:1) to afford the deuterized substrate **1a+1a-*d***. The H/D ratio were calculated by the peak area of corresponding <sup>1</sup>HNMR signal.

### b) Parallel experiments for the *o*-bromination of **1a**

As per general procedure, **1a+1a-*d*** (44.6 mg, 0.2 mmol), N-bromosuccinimide (0.24 mmol), [RhCp\*(MeCN)<sub>3</sub>](SbF<sub>6</sub>)<sub>2</sub> (6.7 mg, 4 mol%), and 1,2-dichloroethane (2.0 mL) were added under N<sub>2</sub> atmosphere into two 25 mL Schlenk tubes. The mixtures were stirred at 60 °C and were stopped at 30 and 60 minutes. The mixture of substrate **1a+1a-D** and product **2a** were roughly isolated by column chromatography isolation on silica gel with petroleum ether / ethyl acetate (50:1), and characterized by <sup>1</sup>HNMR (**Table S1**). Rates were determined as the slopes of the linear regression of the data obtained from a concentration of product (mol/L) versus reaction time (min) plot (**Figure S1**). The KIE value was determined as the ratio of the rates ( $k_H/k_D$ ).

**Table S1.** Results from competition experiments of *o*-bromination

| Time<br>(h) | Relative Peak Area |               |               | Conversion | Concentration (mol/L) |                    |           |
|-------------|--------------------|---------------|---------------|------------|-----------------------|--------------------|-----------|
|             | $\delta=2.52$      | $\delta=2.54$ | $\delta=8.17$ |            | <b>1a</b>             | <b>1a-<i>d</i></b> | <b>2a</b> |
| 0           | 3.00               | 0.00          | 0.60          | 0          | 0.0600                | 0.0400             | -         |
| 0.50        | 2.61               | 0.39          | 0.59          | 13%        | 0.0513                | 0.0357             | 0.0130    |
| 1.00        | 2.19               | 0.81          | 0.58          | 27%        | 0.0423                | 0.0307             | 0.0270    |

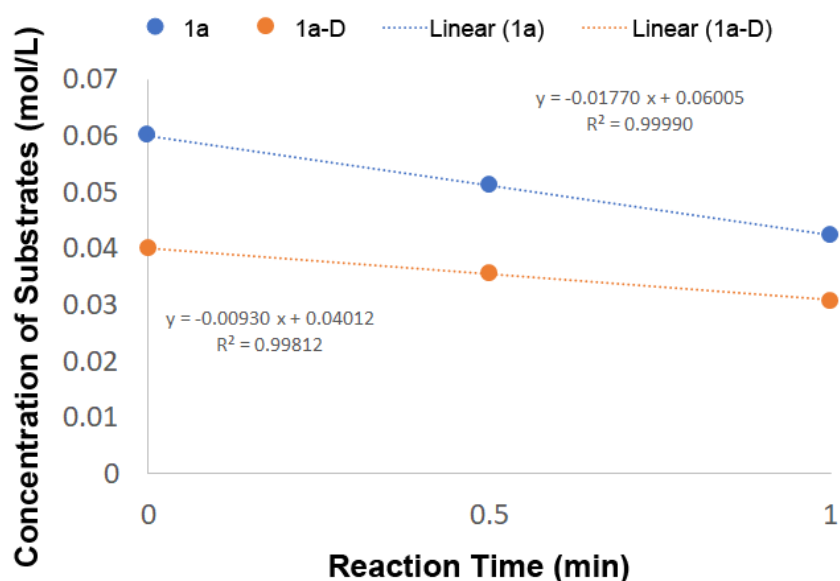

**Figure S1.** KIE experiment result:  $k_H/k_D = 1.27$

### c) Experiments for the 7-bromination of **1i**

As per general procedure, **1i**+**1i**- $d_2$  (44.6 mg, 0.2 mmol), N-bromosuccinimide (0.24 mmol), [RhCp\*(MeCN)<sub>3</sub>](SbF<sub>6</sub>)<sub>2</sub> (6.7 mg, 4 mol%), and 1,2-dichloroethane (2.0 mL) were added under N<sub>2</sub> atmosphere into two 25 mL Schlenk tubes. The mixtures were stirred at 60 °C for 18 hours. The product **5i**+**5i**- $d_2$  was isolated in 61% yield by column chromatography isolation on silica gel with petroleum ether / ethyl acetate (50:1). Rates were determined as the slopes of the linear regression of the data obtained from a concentration of product (mol/L) versus reaction time (min) plot (**Table S2**). The KIE value was determined as the ratio of the rates ( $k_H/k_D$ ).

**Table S2.** Results from competition experiments of *o*-bromination.  $k_H/k_D = 1.23$

| Time (h) | Relative Peak Area                  |                                     | H/D ratio  | Concentration (mol/L) |                   |           |                   |
|----------|-------------------------------------|-------------------------------------|------------|-----------------------|-------------------|-----------|-------------------|
|          | $\delta=2.48$ or $\delta=2.56$ (3H) | $\delta=8.13$ or $\delta=8.11$ (2H) |            | <b>1i</b>             | <b>1i</b> - $d_2$ | <b>6i</b> | <b>6i</b> - $d_2$ |
| 0        | 3.00                                | 0.48                                | 0.24: 0.76 | 0.0240                | 0.0760            | -         | -                 |
| 18       | 3.00                                | 0.56                                | 0.28: 0.72 | -                     | -                 | 0.0171    | 0.0439            |

## 2-4 General Procedure for Radical Scavenging Experiments

A 25 mL Schlenk tube was charged with 2-arylbenzoxazole **1** (0.5 mmol), N-bromo succinimide (0.6 mmol), catalyst (4 mol%), TEMPO (78.1 mg, 0.5 mmol) or BHT (110.2 mg, 0.5 mmol), and 5 mL of 1,2-dichloroethane (DCE). The reaction mixture was degassed and charged with N<sub>2</sub> in the temperature of liquid nitrogen. Then the reaction mixture was warmed gradually to room temperature and was stirred at 60 °C for 18 hours. The solvent was removed on a rotary evaporator under reduced pressure and the residue was subjected to column chromatography isolation on silica gel with petroleum ether / ethyl acetate (50:1-10:1) to afford the pure product.

## 3. Analytical Data of the Products.

### 3-1 ortho-brominated products

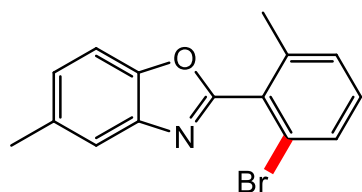

#### 2-(2-bromo-6-methylphenyl)-5-methylbenzo[d]oxazole (**2a**)

Following the typical procedure, 5-methyl-2-(o-tolyl)benzo[d]oxazole (111.6 mg, 0.5 mmol, 1.0 equiv), [RhCp\*(MeCN)<sub>3</sub>](SbF<sub>6</sub>)<sub>2</sub> (16.7 mg, 4 mol%) and N-bromosuccinimide (106.8 mg, 0.6 mmol) in DCE (5.0 mL) were employed to give the product **2a** (145.1 mg) in 96% yield as white solid.

<sup>1</sup>H NMR (400 MHz, CDCl<sub>3</sub>): δ 7.87 – 7.84 (m, 1H), 7.64 – 7.61 (m, 1H), 7.54 (dt, J = 6.9, 3.0 Hz, 1H), 7.44 – 7.39 (m, 2H), 7.31 – 7.26 (m, 2H), 2.29 (s, 3H), 2.16 (s, 3H).

<sup>13</sup>C NMR (101 MHz, CDCl<sub>3</sub>): δ 161.34, 150.64, 141.20, 141.07, 131.62, 130.25, 129.94, 129.04, 125.44, 124.51, 123.80, 120.51, 110.86, 30.89, 20.40.

HRMS (ESI): m/z calcd. for C<sub>15</sub>H<sub>13</sub>BrNO [M+H]<sup>+</sup>: 305.0181 found: 305.0184.

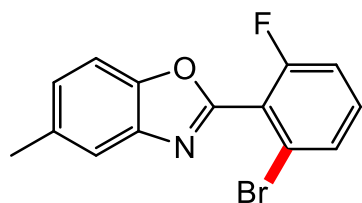

#### 2-(2-bromo-6-fluorophenyl)-5-methylbenzo[d]oxazole (**2b**)

Following the typical procedure, 2-(2-fluorophenyl)-5-methylbenzo[d]oxazole (113.6 mg, 0.5 mmol, 1.0 equiv), [RhCp\*(MeCN)<sub>3</sub>](SbF<sub>6</sub>)<sub>2</sub> (16.7 mg, 4 mol%) and N-bromosuccinimide (106.8 mg, 0.6 mmol) in DCE (5.0 mL) were employed to give the product **2b** (114.8 mg) in 75% yield as white solid.

**<sup>1</sup>H NMR (400 MHz, CDCl<sub>3</sub>):** δ 7.66 (s, 1H), 7.53 (dd, J = 15.7, 8.2 Hz, 2H), 7.39 (td, J = 8.2, 5.9 Hz, 1H), 7.25 – 7.18 (m, 2H), 2.52 (s, 3H).

**<sup>13</sup>C NMR (101 MHz, CDCl<sub>3</sub>):** δ 162.91, 160.36, 149.16, 141.46, 134.61, 132.98, 132.89, 129.09, 129.06, 126.98, 124.22, 120.54, 115.29, 115.07, 114.61, 110.31, 21.48.

**<sup>19</sup>F NMR (376 MHz, CDCl<sub>3</sub>):** δ -107.87, -107.89.

**HRMS (ESI):** m/z calcd. for C<sub>14</sub>H<sub>9</sub>BrFNO [M+H]<sup>+</sup>: 305.9930, found: 305.9937.

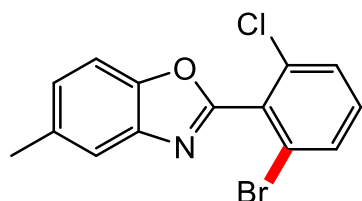

#### 2-(2-bromo-6-chlorophenyl)-5-methylbenzo[d]oxazole (**2c**)<sup>1</sup>

Following the typical procedure, 2-(2-chlorophenyl)-5-methylbenzo[d]oxazole (121.8 mg, 0.5 mmol, 1.0 equiv), [RhCp\*(MeCN)<sub>3</sub>](SbF<sub>6</sub>)<sub>2</sub> (16.7 mg, 4 mol%) and N-bromosuccinimide (106.8 mg, 0.6 mmol) in DCE (5.0 mL) were employed to give the product **2c** (159.4 mg) in 99% yield as white solid.

**<sup>1</sup>H NMR (400 MHz, CDCl<sub>3</sub>):** δ 8.12 (dd, J = 7.5, 1.3 Hz, 1H), 7.83 (s, 1H), 7.70 (s, 1H), 7.56 (d, J = 7.8 Hz, 1H), 7.43 (ddd, J = 16.2, 11.2, 6.9 Hz, 2H), 2.53 (s, 3H).

**<sup>13</sup>C NMR (101 MHz, CDCl<sub>3</sub>):** δ 161.42, 149.31, 141.33, 134.32, 133.56, 132.06, 131.80, 131.47, 126.96, 125.97, 121.34, 114.38, 109.18, 29.70, 23.38.

**GC/MS:** M/Z = 321.97

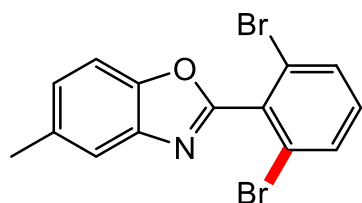

#### 2-(2,6-dibromophenyl)-5-methylbenzo[d]oxazole (**2m**)

Following the typical procedure, 2-(2-bromophenyl)-5-methylbenzo[*d*]oxazole (144.07 mg, 0.5 mmol, 1.0 equiv), [RhCp\*(MeCN)<sub>3</sub>](SbF<sub>6</sub>)<sub>2</sub> (16.7 mg, 4 mol%) and N-bromosuccinimide (106.8 mg, 0.6 mmol) in DCE (5.0 mL) were employed to give the product **2m** (168.6 mg) in 92% yield as white solid.

**<sup>1</sup>H NMR (400 MHz, CDCl<sub>3</sub>):** δ 8.06 (dd, J = 7.8, 1.2 Hz, 1H), 7.83 (s, 1H), 7.77 (d, J = 8.0 Hz, 1H), 7.71 (s, 1H), 7.46 (t, J = 7.6 Hz, 1H), 7.40 – 7.35 (m, 1H), 2.54 (s, 3H).

**<sup>13</sup>C NMR (101 MHz, CDCl<sub>3</sub>):** δ 161.94, 149.33, 141.24, 134.77, 134.31, 132.57, 132.12, 128.04, 127.47, 121.92, 121.36, 121.30, 114.40, 23.39.

**HRMS (ESI):** m/z calcd. for C<sub>14</sub>H<sub>10</sub>Br<sub>2</sub>NO [M+H]<sup>+</sup>: 367.9109 found: 367.9104.

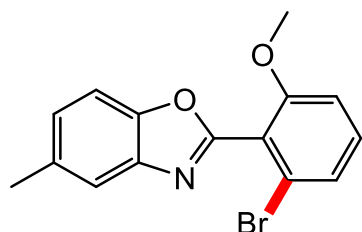

#### 2-(2-bromo-6-methoxyphenyl)-5-methylbenzo[*d*]oxazole (**2n**)

Following the typical procedure, 2-(2-methoxyphenyl)-5-methylbenzo[*d*]oxazole (119.6 mg, 0.5 mmol, 1.0 equiv), [RhCp\*(MeCN)<sub>3</sub>](SbF<sub>6</sub>)<sub>2</sub> (16.7 mg, 4 mol%), N-bromosuccinimide (106.8 mg, 0.6 mmol), and AcOH (30.0 mg, 0.5 mmol, 1.0 equiv) in DCE (5.0 mL) were employed to give the product **2n** (121.2 mg) in 89% yield as white solid.

**<sup>1</sup>H NMR (400 MHz, CDCl<sub>3</sub>):** δ 7.66 (s, 1H), 7.61 (d, J = 8.9 Hz, 1H), 7.51 (d, J = 8.3 Hz, 1H), 7.25 (d, J = 8.8 Hz, 1H), 6.96 (d, J = 8.9 Hz, 1H), 3.95 (s, 3H), 2.52 (s, 3H).

**<sup>13</sup>C NMR (101 MHz, CDCl<sub>3</sub>):** δ 160.38, 155.61, 148.83, 141.13, 134.55, 132.99, 132.05, 126.88, 120.61, 115.00, 114.76, 114.58, 110.38, 56.77, 21.49.

**HRMS (ESI):** m/z calcd. for C<sub>15</sub>H<sub>13</sub>BrNO [M+H]<sup>+</sup>: 318.0130 found: 318.0128.

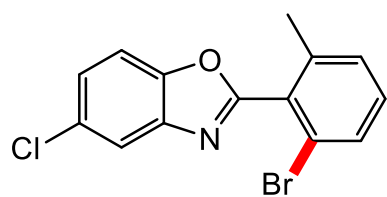

#### 2-(2-bromo-6-methylphenyl)-5-chlorobenzo[*d*]oxazole (**2o**)<sup>1</sup>

Following the typical procedure, 5-chloro-2-(*o*-tolyl)benzo[*d*]oxazole (121.8 mg, 0.5 mmol, 1.0 equiv), [RhCp\*(MeCN)<sub>3</sub>](SbF<sub>6</sub>)<sub>2</sub> (16.7 mg, 4 mol%) and N-bromosuccinimide (106.8 mg, 0.6 mmol) in DCE (5.0 mL) were employed to give the product **2o** (130.5 mg) in 81% yield as white solid.

**<sup>1</sup>H NMR (400 MHz, CDCl<sub>3</sub>):** δ 7.86 (s, 1H), 7.82 (s, 1H), 7.57 (s, 1H), 7.42 (s, 1H), 7.32 (s, 1H), 7.15 (d, J = 6.7 Hz, 1H), 2.29 (s, 3H).

**<sup>13</sup>C NMR (101 MHz, CDCl<sub>3</sub>):** δ 164.35, 149.16, 142.32, 140.63, 136.76, 133.69, 132.03, 130.17, 129.85, 125.92, 120.61, 111.71, 97.54, 20.72.

**GC/MS:** M/Z = 321.95

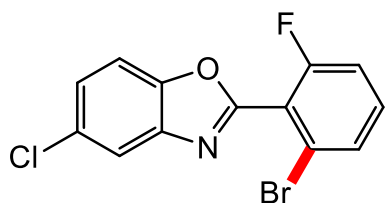

#### 2-(2-bromo-6-fluorophenyl)-5-chlorobenzo[*d*]oxazole (**2p**)

Following the typical procedure, 5-chloro-2-(2-fluorophenyl)benzo[*d*]oxazole (123.8 mg, 0.5 mmol, 1.0 equiv), [RhCp\*(MeCN)<sub>3</sub>](SbF<sub>6</sub>)<sub>2</sub> (16.7 mg, 4 mol%) and N-bromosuccinimide (106.8 mg, 0.6 mmol) in DCE (5.0 mL) under 80 °C were employed to give the product **2p** (67.0 mg) in 41% yield as white solid.

**<sup>1</sup>H NMR (400 MHz, CDCl<sub>3</sub>):** δ 8.20 (t, J = 7.5 Hz, 1H), 7.91 (s, 2H), 7.57 (dd, J = 13.3, 7.1 Hz, 1H), 7.35 – 7.29 (m, 1H), 7.26 (d, J = 8.9 Hz, 1H).

**<sup>13</sup>C NMR (101 MHz, CDCl<sub>3</sub>):** δ 162.25, 159.66, 149.33, 142.18, 133.92, 133.84, 130.76, 130.66, 124.68, 124.64, 121.23, 118.73, 117.35, 117.14, 115.56, 114.80, 114.69.

**<sup>19</sup>F NMR (376 MHz, CDCl<sub>3</sub>):** δ -109.32, -109.34, -109.35, -109.37, -109.38.

**HRMS (ESI):** m/z calcd. for C<sub>13</sub>H<sub>7</sub>BrClFNO [M+H]<sup>+</sup>: 325.9363 found: 325.9357.

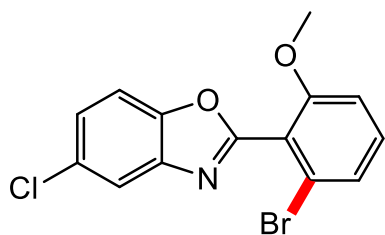

#### 2-(2-bromo-6-methoxyphenyl)-5-chlorobenzo[*d*]oxazole (**2q**)<sup>2</sup>



Following the typical procedure, 5-chloro-2-(2-methoxyphenyl)benzo[d]oxazole (129.8 mg, 0.5 mmol, 1.0 equiv), [RhCp\*(MeCN)<sub>3</sub>](SbF<sub>6</sub>)<sub>2</sub> (16.7 mg, 4 mol%), N-bromosuccinimide (106.8 mg, 0.6 mmol) and AcOH (30.0 mg, 0.5 mmol, 1.0 equiv) in DCE (5.0 mL) were employed to give the product **2q** (147.2 mg) in 87% yield as white solid.

**<sup>1</sup>H NMR (400 MHz, CDCl<sub>3</sub>):** δ 8.23 (s, 1H), 7.77 (s, 1H), 7.58 (d, J = 8.9 Hz, 1H), 7.49 (d, J = 8.6 Hz, 1H), 7.32 (d, J = 8.6 Hz, 1H), 6.96 (d, J = 8.9 Hz, 1H), 3.99 (s, 3H).

**<sup>13</sup>C NMR (101 MHz, CDCl<sub>3</sub>):** δ 161.47, 157.64, 148.96, 143.05, 135.65, 133.71, 131.40, 130.01, 125.63, 120.25, 117.47, 113.97, 112.89, 111.30, 56.51.

**GC/MS:** M/Z = 337.95

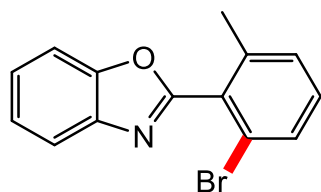

#### 2-(2-bromo-6-methylphenyl)benzo[d]oxazole (**2r**)

Following the typical procedure, 2-(o-tolyl)benzo[d]oxazole (104.6 mg, 0.5 mmol, 1.0 equiv), [RhCp\*(MeCN)<sub>3</sub>](SbF<sub>6</sub>)<sub>2</sub> (16.7 mg, 4 mol%) and N-bromosuccinimide (106.8 mg, 0.6 mmol) in DCE (5.0 mL) were employed to give the product **2r** (128.1 mg) in 89% yield as white solid.

**<sup>1</sup>H NMR (400 MHz, CDCl<sub>3</sub>):** δ 8.17 (d, J = 7.4 Hz, 1H), 7.78 (s, 1H), 7.68 (d, J = 8.4 Hz, 1H), 7.50 (d, J = 8.5 Hz, 1H), 7.44 (d, J = 7.1 Hz, 1H), 7.38 (d, J = 7.2 Hz, 2H), 2.82 (s, 3H).

**<sup>13</sup>C NMR (101 MHz, CDCl<sub>3</sub>):** δ 163.88, 150.78, 141.39, 139.06, 131.90, 131.22, 129.94, 127.82, 126.15, 125.72, 121.09, 117.92, 114.01, 22.22.

**HRMS (ESI):** m/z calcd. for C<sub>14</sub>H<sub>11</sub>BrNO [M+H]<sup>+</sup>: 288.0024, found: 288.0023.

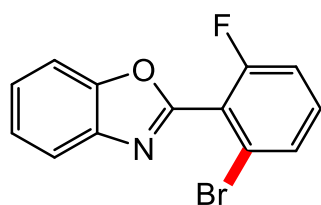

#### 2-(2-bromo-6-fluorophenyl)benzo[d]oxazole (**2s**)

Following the typical procedure, 2-(2-fluorophenyl)benzo[d]oxazole (106.6 mg, 0.5 mmol, 1.0 equiv), [RhCp\*(MeCN)<sub>3</sub>](SbF<sub>6</sub>)<sub>2</sub> (16.7 mg, 4 mol%) and N-bromosuccinimide (106.8 mg,

0.6 mmol) in DCE (5.0 mL) were employed to give the product **2s** (51.4 mg) in 35% yield as white solid.

**<sup>1</sup>H NMR (400 MHz, CDCl<sub>3</sub>):** δ 7.91 (s, 1H), 7.66 (s, 1H), 7.58 (s, 1H), 7.45 (s, 3H), 7.24 (d, J = 6.6 Hz, 1H).

**<sup>13</sup>C NMR (101 MHz, CDCl<sub>3</sub>):** δ 162.93, 160.37, 156.89, 150.90, 141.27, 133.25, 133.09, 133.00, 129.14, 128.25, 125.84, 124.71, 124.21, 121.72, 120.76, 115.33, 115.11, 114.52, 110.96.

**<sup>19</sup>F NMR (376 MHz, CDCl<sub>3</sub>):** δ -107.79, -107.81.

**HRMS (ESI):** m/z calcd. for C<sub>13</sub>H<sub>8</sub>BrFNO [M+H]<sup>+</sup>: 291.9773, found: 291.9768.

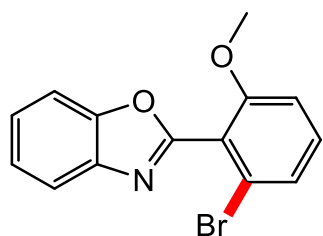

#### 2-(2-bromo-6-methoxyphenyl)benzo[d]oxazole (**2t**)<sup>2</sup>

Following the typical procedure, 2-(2-methoxyphenyl)benzo[d]oxazole (112.6 mg, 0.5 mmol, 1.0 equiv), [RhCp\*(MeCN)<sub>3</sub>](SbF<sub>6</sub>)<sub>2</sub> (16.7 mg, 4 mol%), N-bromosuccinimide (106.8 mg, 0.6 mmol), and AcOH (30.0 mg, 0.5 mmol, 1.0 equiv) in DCE (5.0 mL) were employed to give the product **2t** (138.6 mg) in 91% yield as white solid.

**<sup>1</sup>H NMR (400 MHz, CDCl<sub>3</sub>):** δ 7.87 – 7.81 (m, 1H), 7.61 – 7.55 (m, 1H), 7.40 – 7.34 (m, 2H), 7.33 – 7.24 (m, 2H), 6.91 (d, J = 8.0 Hz, 1H), 3.72 (s, 3H).

**<sup>13</sup>C NMR (101 MHz, CDCl<sub>3</sub>):** δ 160.00, 150.94, 141.45, 132.77, 131.31, 125.32, 124.85, 124.37, 120.55, 112.12, 110.88, 110.48, 110.08, 56.29, 56.22.

**GC/MS:** M/Z = 303.99

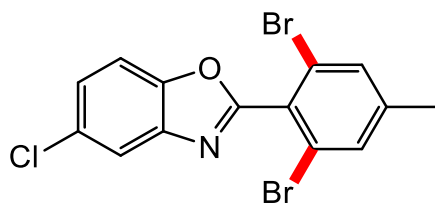

#### 5-chloro-2-(2,6-dibromo-4-methylphenyl)benzo[d]oxazole (**2u**)

Following the typical procedure, 5-chloro-2-(p-tolyl)benzo[d]oxazole (121.8 mg, 0.5 mmol, 1.0 equiv), [RhCp\*(MeCN)<sub>3</sub>](SbF<sub>6</sub>)<sub>2</sub> (16.7 mg, 4 mol%) and N-bromosuccinimide (195.8 mg, 1.1 mmol) in DCE (5.0 mL) were employed to give the product **2u** (142.7 mg) in 71% yield as white solid.

<sup>1</sup>H NMR (400 MHz, CDCl<sub>3</sub>): δ 7.88 (d, J = 1.7 Hz, 1H), 7.78 (s, 2H), 7.59 (d, J = 8.7 Hz, 1H), 7.44 (dd, J = 8.7, 1.8 Hz, 1H), 2.37 (s, 3H).

<sup>13</sup>C NMR (101 MHz, CDCl<sub>3</sub>): δ 165.16, 149.02, 144.23, 142.02, 139.45, 136.06, 130.27, 126.25, 120.86, 111.86, 96.58, 20.43.

HRMS (ESI): m/z calcd. for C<sub>14</sub>H<sub>9</sub>Br<sub>2</sub>ClNO [M+H]<sup>+</sup>: 401.8719 found: 401.8716.

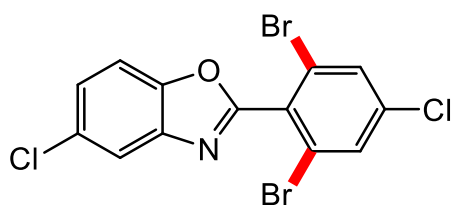

#### 5-chloro-2-(2,6-dibromo-4-chlorophenyl)benzo[d]oxazole (**2v**)

Following the typical procedure, 5-chloro-2-(4-chlorophenyl)benzo[d]oxazole (132.1 mg, 0.5 mmol, 1.0 equiv), [RhCp\*(MeCN)<sub>3</sub>](SbF<sub>6</sub>)<sub>2</sub> (16.7 mg, 4 mol%) and N-bromosuccinimide (195.8 mg, 1.1 mmol) in DCE (5.0 mL) were employed to give the product **2v** (137.1 mg) in 65% yield as white solid.

<sup>1</sup>H NMR (400 MHz, CDCl<sub>3</sub>): δ 7.97 (s, 2H), 7.89 (s, 1H), 7.60 (d, J = 8.7 Hz, 1H), 7.46 (d, J = 8.7 Hz, 1H). <sup>13</sup>C NMR (400 MHz, CDCl<sub>3</sub>).

<sup>13</sup>C NMR (101 MHz, CDCl<sub>3</sub>): δ 164.29, 149.01, 141.87, 138.46, 137.77, 130.50, 129.02, 126.55, 120.98, 111.93, 96.62.

HRMS (ESI): m/z calcd. for C<sub>13</sub>H<sub>6</sub>Br<sub>2</sub>Cl<sub>2</sub>NO [M+H]<sup>+</sup>: 421.8173 found: 421.8175.

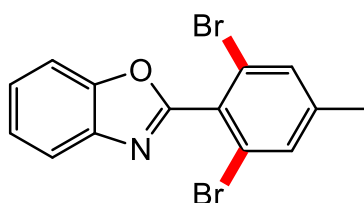

#### 2-(2,6-dibromo-4-methylphenyl)benzo[d]oxazole (**2w**)

Following the typical procedure, 2-(p-tolyl)benzo[d]oxazole (104.6 mg, 0.5 mmol, 1.0 equiv), [RhCp\*(MeCN)<sub>3</sub>](SbF<sub>6</sub>)<sub>2</sub> (16.7 mg, 4 mol%) and N-bromosuccinimide (195.8 mg, 1.1

mmol) in DCE (5.0 mL) were employed to give the product **2w** (112.1 mg) in 61% yield as white solid.

**<sup>1</sup>H NMR (400 MHz, CDCl<sub>3</sub>):** δ 7.91 – 7.84 (m, 1H), 7.67 – 7.61 (m, 1H), 7.49 (s, 2H), 7.47 – 7.38 (m, 2H), 2.41 (s, 3H).

**<sup>13</sup>C NMR (101 MHz, CDCl<sub>3</sub>):** δ 160.46, 150.63, 143.90, 141.02, 132.37, 128.79, 125.70, 124.61, 124.30, 120.75, 110.97, 20.95.

**HRMS (ESI):** m/z calcd. for C<sub>14</sub>H<sub>10</sub>Br<sub>2</sub>NO [M+H]<sup>+</sup>: 367.9109 found: 367.9110.

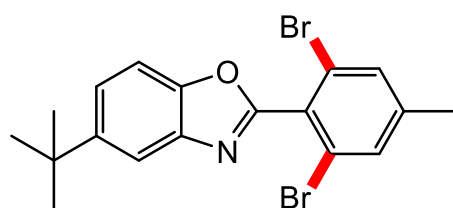

### 5-(tert-butyl)-2-(2,6-dibromo-4-methylphenyl)benzo[d]oxazole (**2x**)

Following the typical procedure, 5-(tert-butyl)-2-(p-tolyl)benzo[d]oxazole (132.7 mg, 0.5 mmol, 1.0 equiv), [RhCp\*(MeCN)<sub>3</sub>](SbF<sub>6</sub>)<sub>2</sub> (16.7 mg, 4 mol%) and N-bromosuccinimide (195.8 mg, 1.1 mmol) in DCE (5.0 mL) were employed to give the product **2x** (128.8 mg) in 63% yield as white solid.

**<sup>1</sup>H NMR (400 MHz, CDCl<sub>3</sub>):** δ 7.90 (d, J = 1.4 Hz, 1H), 7.58 – 7.53 (m, 1H), 7.53 – 7.51 (m, 1H), 7.50 (d, J = 3.5 Hz, 2H), 2.42 (s, 3H), 1.43 (s, 9H).

**<sup>13</sup>C NMR (101 MHz, CDCl<sub>3</sub>):** δ 160.51, 148.63, 148.09, 143.75, 140.94, 132.34, 128.97, 124.33, 123.52, 117.13, 110.06, 34.96, 31.74, 20.91.

**HRMS (ESI):** m/z calcd. for C<sub>18</sub>H<sub>18</sub>Br<sub>2</sub>NO [M+H]<sup>+</sup>: 423.9735 found: 423.9736.

### 3-2 *ortho*-iodinated products

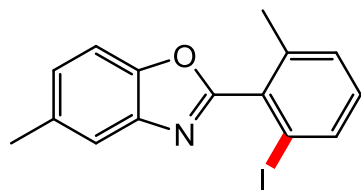

### 2-(2-iodo-6-methylphenyl)-5-methylbenzo[d]oxazole (**3a**)

Following the typical procedure, 5-methyl-2-(*o*-tolyl)benzo[*d*]oxazole (111.6 mg, 0.5 mmol, 1.0 equiv), [RhCp\*(MeCN)<sub>3</sub>](SbF<sub>6</sub>)<sub>2</sub> (16.7 mg, 4 mol%) and N-iodosuccinimide (135.0 mg, 0.6 mmol) in DCE (5.0 mL) were employed to give the product **3a** (165.9 mg) in 95% yield as white solid.

<sup>1</sup>H NMR (400 MHz, CDCl<sub>3</sub>): δ 7.66 (s, 1H), 7.58 – 7.48 (m, 2H), 7.29 (s, 2H), 2.53 (s, 3H), 2.30 (s, 3H).

<sup>13</sup>C NMR (101 MHz, CDCl<sub>3</sub>): δ 161.47, 148.94, 141.47, 141.09, 134.42, 131.77, 131.56, 130.26, 130.17, 129.03, 126.58, 123.89, 121.44, 120.41, 110.26.

HRMS (ESI): *m/z* calcd. for C<sub>15</sub>H<sub>13</sub>INO [M+H]<sup>+</sup>: 350.0042 found: 350.0038.

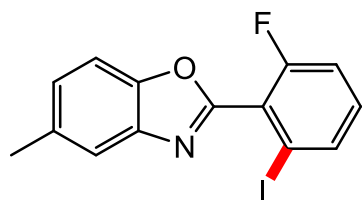

### 2-(2-fluoro-6-iodophenyl)-5-methylbenzo[*d*]oxazole (**3b**)

Following the typical procedure, 2-(2-fluorophenyl)-5-methylbenzo[*d*]oxazole (113.6 mg, 0.5 mmol, 1.0 equiv), [RhCp\*(MeCN)<sub>3</sub>](SbF<sub>6</sub>)<sub>2</sub> (16.7 mg, 4 mol%) and N-iodosuccinimide (135.0 mg, 0.6 mmol) in DCE (5.0 mL) were employed to give the product **3b** (139.5 mg) in 89% yield as white solid.

<sup>1</sup>H NMR (400 MHz, CDCl<sub>3</sub>): δ 7.81 (s, 1H), 7.69 (s, 1H), 7.53 (s, 1H), 7.25 (s, 3H), 2.54 (s, 3H).

<sup>13</sup>C NMR (101 MHz, CDCl<sub>3</sub>): δ 162.26, 159.70, 149.13, 141.41, 135.47, 134.63, 133.41, 133.33, 127.28, 127.00, 120.82, 120.58, 116.05, 115.84, 110.49, 110.34, 97.55, 21.48.

<sup>19</sup>F NMR (376 MHz, CDCl<sub>3</sub>): δ -106.97, -106.98.

HRMS (ESI): *m/z* calcd. for C<sub>14</sub>H<sub>9</sub>FINO [M+H]<sup>+</sup>: 354.9791 found: 354.9786.

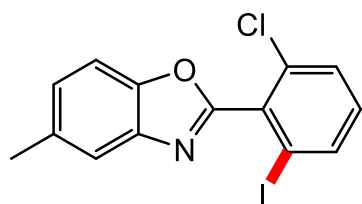

### 2-(2-chloro-6-iodophenyl)-5-methylbenzo[*d*]oxazole (**3c**)<sup>1</sup>

Following the typical procedure, 2-(2-chlorophenyl)-5-methylbenzo[*d*]oxazole (121.8 mg, 0.5 mmol, 1.0 equiv), [RhCp\*(MeCN)<sub>3</sub>](SbF<sub>6</sub>)<sub>2</sub> (16.7 mg, 4 mol%) and N-iodosuccinimide (135.0 mg, 0.6 mmol) in DCE (5.0 mL) were employed to give the product **3c** (183.0 mg) in 89% yield as white solid.

**<sup>1</sup>H NMR (400 MHz, CDCl<sub>3</sub>):** δ 7.88 (d, J = 7.9 Hz, 1H), 7.68 (s, 1H), 7.53 (dd, J = 8.1, 4.5 Hz, 2H), 7.27 (d, J = 7.8 Hz, 1H), 7.18 (t, J = 8.1 Hz, 1H), 2.54 (s, 3H).

**<sup>13</sup>C NMR (101 MHz, CDCl<sub>3</sub>):** δ 161.03, 148.89, 141.20, 137.51, 135.33, 134.63, 133.97, 132.69, 129.34, 127.01, 120.67, 110.42, 98.34, 21.53.

**GC/MS:** M/Z = 369.95

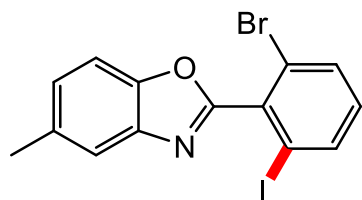

#### 2-(2-bromo-6-iodophenyl)-5-methylbenzo[*d*]oxazole (**3m**)

Following the typical procedure, 2-(2-bromophenyl)-5-methylbenzo[*d*]oxazole (144.07 mg, 0.5 mmol, 1.0 equiv), [RhCp\*(MeCN)<sub>3</sub>](SbF<sub>6</sub>)<sub>2</sub> (16.7 mg, 4 mol%) and N-iodosuccinimide (135.0 mg, 0.6 mmol) in DCE (5.0 mL) were employed to give the product **3m** (202.7 mg) in 98% yield as white solid.

**<sup>1</sup>H NMR (400 MHz, CDCl<sub>3</sub>):** δ 7.90 (d, J = 8.0 Hz, 1H), 7.68 (d, J = 9.0 Hz, 2H), 7.52 (d, J = 8.3 Hz, 1H), 7.25 (d, J = 6.8 Hz, 1H), 7.08 (t, J = 8.0 Hz, 1H), 2.52 (s, 3H).

**<sup>13</sup>C NMR (101 MHz, CDCl<sub>3</sub>):** δ 162.09, 148.73, 141.06, 137.95, 135.79, 134.61, 132.88, 132.38, 126.99, 123.89, 120.65, 110.39, 98.16, 21.48.

**HRMS (ESI):** m/z calcd. for C<sub>14</sub>H<sub>10</sub>BrINO [M+H]<sup>+</sup>: 413.8990 found: 413.8983.

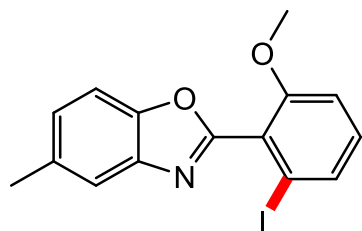

#### 2-(2-iodo-6-methoxyphenyl)-5-methylbenzo[*d*]oxazole (**3n**)

Following the typical procedure, 2-(2-methoxyphenyl)-5-methylbenzo[*d*]oxazole (104.6 mg, 0.5 mmol, 1.0 equiv), [RhCp\*(MeCN)<sub>3</sub>](SbF<sub>6</sub>)<sub>2</sub> (16.7 mg, 4 mol%), N-iodosuccinimide (135.0 mg, 0.6 mmol), and AcOH (30.0 mg, 0.5 mmol, 1.0 equiv) in DCE (5.0 mL) were employed to give the product **3n** (181.1 mg) in 99% yield as white solid.

**<sup>1</sup>H NMR (400 MHz, CDCl<sub>3</sub>):** δ 7.66 (s, 1H), 7.55 (d, J = 7.9 Hz, 1H), 7.51 (d, J = 8.3 Hz, 1H), 7.21 (dd, J = 16.1, 7.8 Hz, 2H), 7.00 (d, J = 8.4 Hz, 1H), 3.78 (s, 3H), 2.53 (s, 3H).

**<sup>13</sup>C NMR (101 MHz, CDCl<sub>3</sub>):** δ 161.28, 159.46, 149.04, 141.52, 134.17, 132.91, 131.05, 126.39, 120.37, 112.03, 110.76, 110.21, 98.67, 56.10, 29.65, 21.45.

**HRMS (ESI):** m/z calcd. for C<sub>15</sub>H<sub>13</sub>BrNO [M+H]<sup>+</sup>: 365.9991 found: 365.9999.

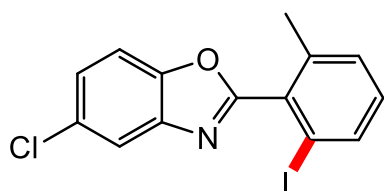

#### 5-chloro-2-(2-iodo-6-methylphenyl)benzo[*d*]oxazole (**3o**)<sup>1</sup>

Following the typical procedure, 5-chloro-2-(*o*-tolyl)benzo[*d*]oxazole (121.8 mg, 0.5 mmol, 1.0 equiv), [RhCp\*(MeCN)<sub>3</sub>](SbF<sub>6</sub>)<sub>2</sub> (16.7 mg, 4 mol%) and N-iodosuccinimide (135.0 mg, 0.6 mmol) in DCE (5.0 mL) were employed to give the product **3o** (162.6 mg) in 88% yield as white solid.

**<sup>1</sup>H NMR (400 MHz, CDCl<sub>3</sub>):** δ 7.86 (s, 1H), 7.82 (s, 1H), 7.57 (s, 1H), 7.42 (s, 1H), 7.32 (s, 1H), 7.15 (d, J = 6.7 Hz, 1H), 2.29 (s, 3H).

**<sup>13</sup>C NMR (101 MHz, CDCl<sub>3</sub>):** δ 164.35, 149.16, 142.32, 140.63, 136.76, 133.69, 132.03, 130.17, 129.85, 125.92, 120.61, 111.71, 97.54, 20.72.

**GC/MS:** M/Z = 369.95

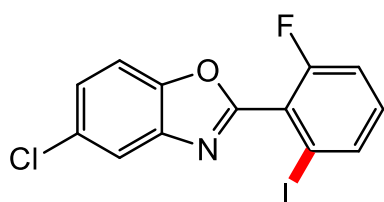

#### 5-chloro-2-(2-fluoro-6-iodophenyl)benzo[*d*]oxazole (**3p**)

Following the typical procedure, 5-chloro-2-(2-(2-fluorophenyl)benzo[*d*]oxazole (123.8 mg, 0.5 mmol, 1.0 equiv), [RhCp\*(MeCN)<sub>3</sub>](SbF<sub>6</sub>)<sub>2</sub> (16.7 mg, 4 mol%) and N-iodosuccinimide (135.0 mg, 0.6 mmol) in DCE (5.0 mL) under 80 °C were employed to give the product **3p** (91.6 mg) in 49% yield as white solid.

**<sup>1</sup>H NMR (400 MHz, CDCl<sub>3</sub>):** δ 7.86 (d, J = 2.0 Hz, 1H), 7.82 – 7.78 (m, 1H), 7.56 (d, J = 8.7 Hz, 1H), 7.41 (dd, J = 8.7, 2.1 Hz, 1H), 7.27 – 7.21 (m, 2H).

**<sup>13</sup>C NMR (101 MHz, CDCl<sub>3</sub>):** δ 162.25, 159.68, 149.43, 142.26, 135.61, 135.58, 133.78, 133.69, 130.34, 126.27, 125.82, 120.73, 120.29, 116.14, 115.92, 111.77, 111.46, 97.33.

**<sup>19</sup>F NMR (376 MHz, CDCl<sub>3</sub>):** δ -106.84, -106.86.

**HRMS (ESI):** m/z calcd. for C<sub>13</sub>H<sub>7</sub>BrClFNO [M+H]<sup>+</sup>: 373.9245 found: 373.9239.

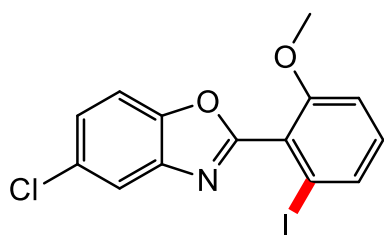

**5-chloro-2-(2-iodo-6-methoxyphenyl)benzo[*d*]oxazole (3q) <sup>2</sup>**

Following the typical procedure, 5-chloro-2-(2-(2-methoxyphenyl)benzo[*d*]oxazole (129.8 mg, 0.5 mmol, 1.0 equiv), [RhCp\*(MeCN)<sub>3</sub>](SbF<sub>6</sub>)<sub>2</sub> (16.7 mg, 4 mol%), N-iodosuccinimide (135.0 mg, 0.6 mmol), and AcOH (30.0 mg, 0.5 mmol, 1.0 equiv) in DCE (5.0 mL) were employed to give the product **3q** (179.4 mg) in 93% yield as white solid.

**<sup>1</sup>H NMR (400 MHz, CDCl<sub>3</sub>):** δ 7.81 (d, J = 18.0 Hz, 1H), 7.58 – 7.42 (m, 2H), 7.38 (dd, J = 8.6, 1.9 Hz, 1H), 7.23 – 7.15 (m, 1H), 6.99 (d, J = 8.4 Hz, 1H), 3.77 (s, 3H).

**<sup>13</sup>C NMR (101 MHz, CDCl<sub>3</sub>):** δ 159.47, 142.45, 133.23, 131.35, 131.16, 129.89, 125.66, 120.75, 120.51, 112.13, 111.63, 110.83, 98.41, 77.32, 77.00, 76.68, 56.15.

**GC/MS:** M/Z = 385.94

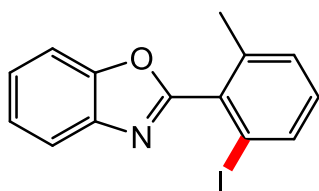

**2-(2-iodo-6-methylphenyl)-5-methylbenzo[*d*]oxazole (3r)**



Following the typical procedure, 2-(*o*-tolyl)benzo[*d*]oxazole (104.6 mg, 0.5 mmol, 1.0 equiv), [RhCp\*(MeCN)<sub>3</sub>](SbF<sub>6</sub>)<sub>2</sub> (16.7 mg, 4 mol%) and N-iodosuccinimide (135.0 mg, 0.6 mmol) in DCE (5.0 mL) were employed to give the product **3r** (142.3 mg) in 85% yield as white solid.

<sup>1</sup>H NMR (400 MHz, CDCl<sub>3</sub>): δ 7.89 – 7.83 (m, 1H), 7.79 (d, J = 7.9 Hz, 1H), 7.66 – 7.60 (m, 1H), 7.46 – 7.38 (m, 2H), 7.29 (d, J = 7.7 Hz, 1H), 7.12 (t, J = 7.8 Hz, 1H), 2.27 (s, 3H).

<sup>13</sup>C NMR (101 MHz, CDCl<sub>3</sub>): δ 162.93, 150.53, 141.16, 140.62, 136.65, 134.10, 131.78, 129.75, 125.47, 124.54, 120.57, 110.88, 97.70, 77.32, 77.01, 76.69, 20.72.

HRMS (ESI): m/z calcd. for C<sub>14</sub>H<sub>11</sub>INO [M+H]<sup>+</sup>: 335.9885, found: 335.9880.

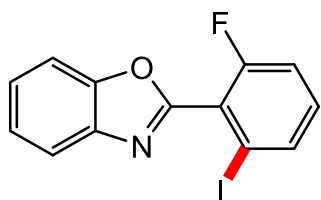

### 2-(2-fluoro-6-iodophenyl)benzo[*d*]oxazole (**3s**)

Following the typical procedure, 2-(2-fluorophenyl)benzo[*d*]oxazole (106.6 mg, 0.5 mmol, 1.0 equiv), [RhCp\*(MeCN)<sub>3</sub>](SbF<sub>6</sub>)<sub>2</sub> (16.7 mg, 4 mol%) and N-iodosuccinimide (135.0 mg, 0.6 mmol) in DCE (5.0 mL) were employed to give the product **3s** (71.2 mg) in 42% yield as white solid.

<sup>1</sup>H NMR (400 MHz, CDCl<sub>3</sub>): δ 7.91 (s, 1H), 7.81 (s, 1H), 7.66 (s, 1H), 7.45 (s, 2H), 7.24 (s, 2H).

<sup>13</sup>C NMR (101 MHz, CDCl<sub>3</sub>): δ 133.09, 133.00, 129.14, 125.84, 124.71, 120.76, 115.33, 115.11, 110.96.

<sup>19</sup>F NMR (376 MHz, CDCl<sub>3</sub>): δ 106.90, 106.92.

HRMS (ESI): m/z calcd. for C<sub>14</sub>H<sub>11</sub>BrNO [M+H]<sup>+</sup>: 339.9629, found: 339.9621.

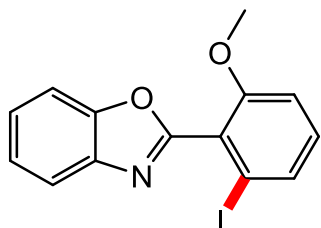

### 2-(2-iodo-6-methoxyphenyl)benzo[*d*]oxazole (**3t**)<sup>2</sup>

Following the typical procedure, 2-(2-methoxyphenyl)benzo[*d*]oxazole (112.6 mg, 0.5 mmol, 1.0 equiv), [RhCp\*(MeCN)<sub>3</sub>](SbF<sub>6</sub>)<sub>2</sub> (16.7 mg, 4 mol%), N-iodosuccinimide (135.0 mg, 0.6 mmol), and AcOH (30.0 mg, 0.5 mmol, 1.0 equiv) in DCE (5.0 mL) were employed to give the product **3t** (166.6 mg) in 95% yield as white solid.

**<sup>1</sup>H NMR (400 MHz, CDCl<sub>3</sub>):** δ 7.90 – 7.85 (m, 1H), 7.64 (dt, J = 4.9, 2.8 Hz, 1H), 7.57 (d, J = 7.9 Hz, 1H), 7.46 – 7.39 (m, 2H), 7.22 (t, J = 8.2 Hz, 1H), 7.01 (d, J = 8.4 Hz, 1H), 3.78 (d, J = 8.6 Hz, 3H).

**<sup>13</sup>C NMR (101 MHz, CDCl<sub>3</sub>):** δ 199.06, 161.24, 159.55, 150.87, 141.42, 133.02, 131.17, 125.30, 124.36, 123.92, 120.60, 110.88, 98.66, 56.18.

**GC/MS:** M/Z = 351.99

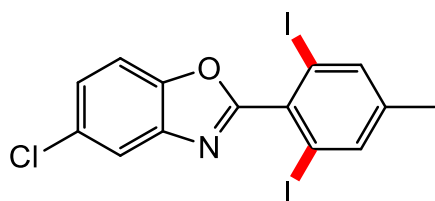

**5-chloro-2-(2,6-diiodo-4-methylphenyl)benzo[*d*]oxazole (3u)**

Following the typical procedure, 5-chloro-2-(*p*-tolyl)benzo[*d*]oxazole (121.6 mg, 0.5 mmol, 1.0 equiv), [RhCp\*(MeCN)<sub>3</sub>](SbF<sub>6</sub>)<sub>2</sub> (16.7 mg, 4 mol%) and N-iodosuccinimide (247.5 mg, 1.1 mmol) in DCE (5.0 mL) were employed to give the product **3u** (180.6 mg) in 73% yield as white solid.

**<sup>1</sup>H NMR (400 MHz, CDCl<sub>3</sub>):** δ 7.88 (d, J = 1.7 Hz, 1H), 7.78 (s, 2H), 7.59 (d, J = 8.7 Hz, 1H), 7.44 (dd, J = 8.7, 1.8 Hz, 1H), 2.37 (s, 3H).

**<sup>13</sup>C NMR (101 MHz, CDCl<sub>3</sub>):** δ 165.16, 149.02, 144.23, 142.02, 139.45, 136.06, 130.27, 126.25, 120.86, 111.86, 96.58, 20.43.

**HRMS (ESI):** m/z calcd. for C<sub>14</sub>H<sub>9</sub>ClI<sub>2</sub>NO [M+H]<sup>+</sup>: 495.8462 found: 495.8456.

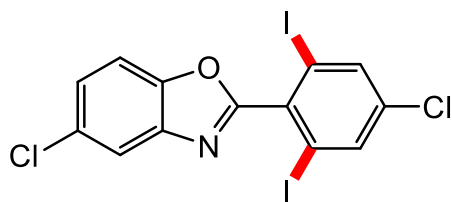

**5-chloro-2-(4-chloro-2,6-diiodophenyl)benzo[*d*]oxazole (3v)**

Following the typical procedure, 5-chloro-2-(4-chlorophenyl)benzo[*d*]oxazole (132.1 mg, 0.5 mmol, 1.0 equiv), [RhCp\*(MeCN)<sub>3</sub>](SbF<sub>6</sub>)<sub>2</sub> (16.7 mg, 4 mol%) and N-iodosuccinimide (247.5 mg, 1.1 mmol) in DCE (5.0 mL) were employed to give the product **3v** (170.2 mg) in 66% yield as white solid.).

**<sup>1</sup>H NMR (400 MHz, CDCl<sub>3</sub>):** δ 7.97 (s, 2H), 7.89 (s, 1H), 7.60 (d, J = 8.7 Hz, 1H), 7.46 (d, J = 8.7 Hz, 1H).

**<sup>13</sup>C NMR (101 MHz, CDCl<sub>3</sub>):** δ 164.29, 149.01, 141.87, 138.46, 137.77, 130.50, 129.02, 126.55, 120.98, 111.93, 96.62.

**HRMS (ESI):** m/z calcd. for C<sub>13</sub>H<sub>6</sub>Cl<sub>2</sub>I<sub>2</sub>NO [M+H]<sup>+</sup>: 515.7916 found: 515.7920.

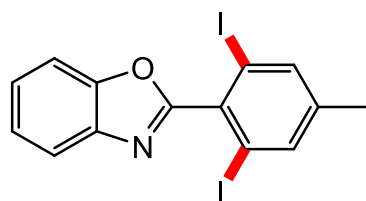

#### 2-(2,6-diiodo-4-methylphenyl)benzo[*d*]oxazole (**3w**)

Following the typical procedure, 2-(*p*-tolyl)benzo[*d*]oxazole (104.6 mg, 0.5 mmol, 1.0 equiv), [RhCp\*(MeCN)<sub>3</sub>](SbF<sub>6</sub>)<sub>2</sub> (16.7 mg, 4 mol%) and N-iodosuccinimide (247.5 mg, 1.1 mmol) in DCE (5.0 mL) were employed to give the product **3w** (159.0 mg) in 69% yield as white solid.

**<sup>1</sup>H NMR (400 MHz, CDCl<sub>3</sub>):** δ 7.90 – 7.83 (m, 1H), 7.66 – 7.60 (m, 1H), 7.49 (s, 2H), 7.46 – 7.37 (m, 2H), 2.40 (s, 3H).

**<sup>13</sup>C NMR (101 MHz, CDCl<sub>3</sub>):** δ 160.46, 150.63, 143.90, 141.02, 132.37, 128.79, 125.70, 124.61, 124.30, 120.75, 110.97, 20.95.

**HRMS (ESI):** m/z calcd. for C<sub>13</sub>H<sub>8</sub>I<sub>2</sub>NO [M+H]<sup>+</sup>: 447.8695 found: 447.8689.

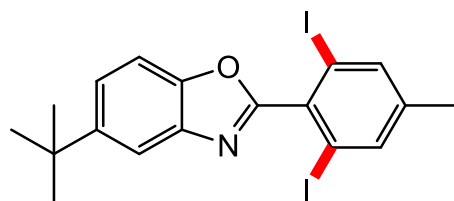

#### 5-(*tert*-butyl)-2-(2,6-diiodo-4-methylphenyl)benzo[*d*]oxazole (**3x**)

Following the typical procedure, 5-(tert-butyl)-2-(p-tolyl)benzo[*d*]oxazole (132.7 mg, 0.5 mmol, 1.0 equiv), [RhCp\*(MeCN)<sub>3</sub>](SbF<sub>6</sub>)<sub>2</sub> (16.7 mg, 4 mol%) and N-iodosuccinimide (247.5 mg, 1.1 mmol) in DCE (5.0 mL) were employed to give the product **3x** (152.9 mg) in 59% yield as white solid.

**<sup>1</sup>H NMR (400 MHz, CDCl<sub>3</sub>):** δ 7.89 (d, J = 1.4 Hz, 1H), 7.78 (s, 2H), 7.57 (d, J = 8.6 Hz, 1H), 7.52 (dd, J = 8.6, 1.8 Hz, 1H), 2.37 (s, 3H), 1.44 (s, 9H).

**<sup>13</sup>C NMR (101 MHz, CDCl<sub>3</sub>):** δ 163.88, 148.38, 148.08, 143.82, 140.80, 139.36, 136.63, 123.63, 117.20, 110.06, 96.80, 34.97, 31.75, 20.34.

**HRMS (ESI):** m/z calcd. for C<sub>18</sub>H<sub>18</sub>I<sub>2</sub>NO [M+H]<sup>+</sup>: 517.9478 found: 517.9481.

### 3-3 C7-brominated products

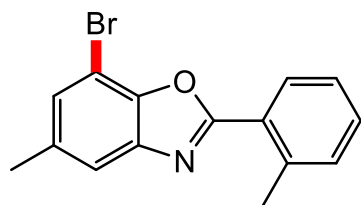

#### 7-bromo-5-methyl-2-(o-tolyl)benzo[*d*]oxazole (**5a**)

Following the typical procedure, 5-methyl-2-(o-tolyl)benzo[*d*]oxazole (111.6 mg, 0.5 mmol, 1.0 equiv), [(p-cymene)Ru(MeCN)<sub>3</sub>]<sub>2</sub> SbF<sub>6</sub> (14.6 mg, 5 mol%) and N-bromosuccinimide (106.8 mg, 0.6 mmol) in MeCN (5.0 mL) were employed to give the product **5a** (109.8 mg) in 73% yield as white solid.

**<sup>1</sup>H NMR (400 MHz, CDCl<sub>3</sub>):** δ 8.14 (d, J = 7.5 Hz, 1H), 7.79 (s, 1H), 7.65 (s, 1H), 7.41 (d, J = 7.1 Hz, 1H), 7.34 (d, J = 6.9 Hz, 2H), 2.79 (s, 3H), 2.51 (d, J = 7.5 Hz, 3H).

**<sup>13</sup>C NMR (101 MHz, CDCl<sub>3</sub>):** <sup>13</sup>C NMR (101 MHz, CDCl<sub>3</sub>) δ 149.04, 141.80, 138.97, 133.90, 131.86, 131.75, 131.09, 130.77, 129.92, 126.11, 121.05, 114.11, 109.83, 23.35, 22.23.

**HRMS (ESI):** m/z calcd. for C<sub>15</sub>H<sub>13</sub>BrNO [M+H]<sup>+</sup>: 302.0181 found: 302.0186.

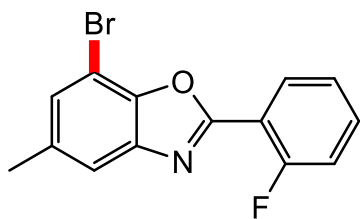

### 7-bromo-2-(2-fluorophenyl)-5-methylbenzo[d]oxazole (**5b**)

Following the typical procedure, 2-(2-fluorophenyl)-5-methylbenzo[d]oxazole (113.6 mg, 0.5 mmol, 1.0 equiv), [(p-cymene)Ru(MeCN)<sub>3</sub>]<sub>2</sub> SbF<sub>6</sub> (14.6 mg, 5 mol%) and N-bromosuccinimide (106.8 mg, 0.6 mmol) in MeCN (5.0 mL) were employed to give the product **5b** (130.5 mg) in 73% yield as white solid.

<sup>1</sup>H NMR (400 MHz, CDCl<sub>3</sub>): δ 8.18 (t, J = 7.5 Hz, 1H), 7.79 (s, 1H), 7.66 (s, 1H), 7.51 (dd, J = 12.9, 7.0 Hz, 1H), 7.28 (dd, J = 16.0, 8.3 Hz, 2H), 2.51 (s, 3H).

<sup>13</sup>C NMR (101 MHz, CDCl<sub>3</sub>): δ 162.10, 159.90, 159.52, 149.16, 141.40, 134.33, 133.30 (d, J = 8.64), 130.50, 124.53 (d, J = 3.39), 121.18, 117.13 (d, J = 21.44), 115.23 (d, J = 10.83), 114.31, 23.41.

<sup>19</sup>F NMR (376 MHz, CDCl<sub>3</sub>): δ -109.74, -109.75.

HRMS (ESI): m/z calcd. for C<sub>14</sub>H<sub>10</sub>BrFNO [M+H]<sup>+</sup>: 305.9930 found: 305.9927.

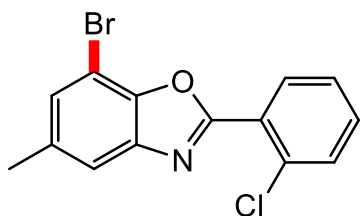

### 7-bromo-2-(2-chlorophenyl)-5-methylbenzo[d]oxazole (**5c**)

Following the typical procedure, 2-(2-chlorophenyl)-5-methylbenzo[d]oxazole (121.8 mg, 0.5 mmol, 1.0 equiv), [(p-cymene)Ru(MeCN)<sub>3</sub>]<sub>2</sub> SbF<sub>6</sub> (14.6 mg, 5 mol%) and N-bromosuccinimide (106.8 mg, 0.6 mmol) in MeCN (5.0 mL) were employed to give the product **5c** (127.4 mg) in 79% yield as white solid.

<sup>1</sup>H NMR (400 MHz, CDCl<sub>3</sub>): δ 8.11 (d, J = 7.5 Hz, 1H), 7.81 (s, 1H), 7.69 (s, 1H), 7.55 (d, J = 7.8 Hz, 1H), 7.48 – 7.37 (m, 2H), 2.52 (s, 3H).

<sup>13</sup>C NMR (101 MHz, CDCl<sub>3</sub>): δ 161.40, 149.29, 141.32, 134.31, 133.54, 132.06, 131.79, 131.47, 126.96, 125.94, 121.34, 114.37, 23.40.

**HRMS (ESI):** m/z calcd. for C<sub>14</sub>H<sub>10</sub>BrCINO [M+H]<sup>+</sup>: 321.9635 found: 321.9639.

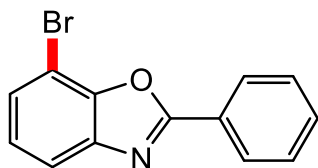

#### 7-bromo-2-phenylbenzo[d]oxazole (**5d**)

Following the typical procedure, 2-phenylbenzo[d]oxazole (97.6 mg, 0.5 mmol, 1.0 equiv), [(p-cymene)Ru(MeCN)<sub>3</sub>]<sub>2</sub> SbF<sub>6</sub> (14.6 mg, 5 mol%) and N-bromosuccinimide (106.8 mg, 0.6 mmol) in MeCN (5.0 mL) were employed to give the product **5d** (125.0 mg) in 91% yield as white solid.

**<sup>1</sup>H NMR (400 MHz, CDCl<sub>3</sub>):** δ 8.22 (d, J = 6.9 Hz, 2H), 7.74 (s, 1H), 7.62 (d, J = 8.4 Hz, 1H), 7.54 (t, J = 10.2 Hz, 3H), 7.47 (d, J = 8.4 Hz, 1H).

**<sup>13</sup>C NMR (101 MHz, CDCl<sub>3</sub>):** δ 163.56, 151.24, 141.35, 131.85, 128.99, 128.04, 127.72, 126.69, 120.96, 117.98, 114.13.

**HRMS (ESI):** m/z calcd. for C<sub>13</sub>H<sub>9</sub>BrNO [M+H]<sup>+</sup>: 273.9868 found: 273.9864.

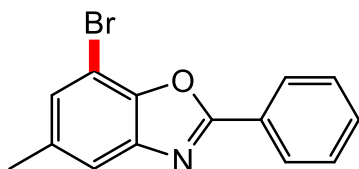

#### 7-bromo-5-methyl-2-phenylbenzo[d]oxazole (**5e**)

Following the typical procedure, 5-methyl-2-phenylbenzo[d]oxazole (121.6 mg, 0.5 mmol, 1.0 equiv), [(p-cymene)Ru(MeCN)<sub>3</sub>]<sub>2</sub> SbF<sub>6</sub> (14.6 mg, 5 mol%) and N-bromosuccinimide (106.8 mg, 0.6 mmol) in MeCN (5.0 mL) were employed to give the product **5e** (142.4 mg) in 99% yield as white solid.

**<sup>1</sup>H NMR (400 MHz, CDCl<sub>3</sub>):** δ 8.21 (d, J = 6.7 Hz, 2H), 7.77 (s, 1H), 7.61 (s, 1H), 7.53 (t, J = 9.5 Hz, 3H), 2.51 (s, 3H).

**<sup>13</sup>C NMR (101 MHz, CDCl<sub>3</sub>):** δ 163.52, 149.49, 141.77, 134.14, 131.69, 128.94, 127.67, 126.89, 120.91, 120.66, 114.22, 23.38.

**HRMS (ESI):** m/z calcd. for C<sub>14</sub>H<sub>11</sub>BrNO [M+H]<sup>+</sup>: 288.0025 found: 288.0027.

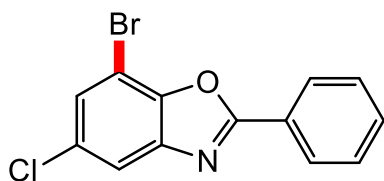

#### 7-bromo-5-chloro-2-phenylbenzo[d]oxazole (**5f**)

Following the typical procedure, 5-chloro-2-phenylbenzo[d]oxazole (114.8 mg, 0.5 mmol, 1.0 equiv), [(p-cymene)Ru(MeCN)<sub>3</sub>]<sub>2</sub> SbF<sub>6</sub> (14.6 mg, 5 mol%) and N-bromosuccinimide (106.8 mg, 0.6 mmol) in MeCN (5.0 mL) were employed to give the product **5f** (95.7 mg) in 62% yield as white solid.

<sup>1</sup>H NMR (400 MHz, CDCl<sub>3</sub>): δ 8.21 (d, J = 7.2 Hz, 2H), 7.86 (s, 2H), 7.61 – 7.50 (m, 3H).

<sup>13</sup>C NMR (101 MHz, CDCl<sub>3</sub>): δ 164.72, 149.61, 142.58, 132.24, 130.56, 129.07, 127.89, 126.31, 120.93, 118.19, 115.40.

HRMS (ESI): m/z calcd. for C<sub>13</sub>H<sub>8</sub>BrClNO [M+H]<sup>+</sup>: 307.9478 found: 307.9478.

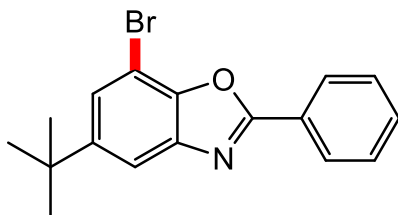

#### 7-bromo-5-(*tert*-butyl)-2-phenylbenzo[d]oxazole (**5g**)

Following the typical procedure, 5-(*tert*-butyl)-2-phenylbenzo[d]oxazole (125.7 mg, 0.5 mmol, 1.0 equiv), [(p-cymene)Ru(MeCN)<sub>3</sub>]<sub>2</sub> SbF<sub>6</sub> (14.6 mg, 5 mol%) and N-bromosuccinimide (106.8 mg, 0.6 mmol) in MeCN (5.0 mL) were employed to give the product **5g** (123.1 mg) in 75% yield as white solid.

<sup>1</sup>H NMR (400 MHz, CDCl<sub>3</sub>): δ 8.29 (d, J = 7.0 Hz, 1H), 8.22 (d, J = 7.0 Hz, 2H), 7.89 (s, 1H), 7.83 (s, 1H), 7.51 (s, 2H), 7.43 (dt, J = 14.8, 7.5 Hz, 1H), 1.59 (s, 9H).

<sup>13</sup>C NMR (101 MHz, CDCl<sub>3</sub>): δ 149.13, 144.61, 141.53, 131.73, 128.98, 127.67, 126.88, 124.49, 118.80, 117.28, 108.59, 36.99, 30.14.

HRMS (ESI): m/z calcd. for C<sub>17</sub>H<sub>17</sub>BrNO [M+H]<sup>+</sup>: 330.0494 found: 330.0498.

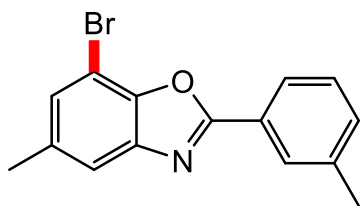

#### 7-bromo-5-methyl-2-(*m*-tolyl)benzo[*d*]oxazole (**5h**)

Following the typical procedure, 5-methyl-2-(*m*-tolyl)benzo[*d*]oxazole (111.6 mg, 0.5 mmol, 1.0 equiv), [(*p*-cymene)Ru(MeCN)<sub>3</sub>]<sub>2</sub> SbF<sub>6</sub> (14.6 mg, 5 mol%) and N-bromosuccinimide (106.8 mg, 0.6 mmol) in MeCN (5.0 mL) were employed to give the product **5h** (111.6 mg) in 74% yield as white solid.

<sup>1</sup>H NMR (400 MHz, CDCl<sub>3</sub>): δ 8.05 (s, 1H), 8.00 (d, J = 7.6 Hz, 1H), 7.77 (s, 1H), 7.60 (s, 1H), 7.43 – 7.37 (m, 1H), 7.35 (d, J = 7.5 Hz, 1H), 2.51 (s, 3H), 2.45 (s, 3H).

<sup>13</sup>C NMR (101 MHz, CDCl<sub>3</sub>): δ 163.75, 149.48, 141.77, 138.80, 134.11, 132.56, 128.86, 128.22, 126.74, 124.82, 120.84, 120.57, 114.18, 23.38, 21.34.

HRMS (ESI): *m/z* calcd. for C<sub>15</sub>H<sub>13</sub>BrNO [M+H]<sup>+</sup>: 302.0181, found: 302.0179.

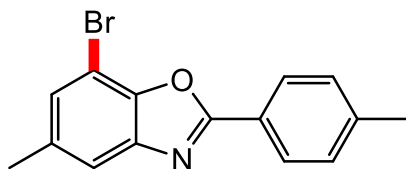

#### 7-bromo-5-methyl-2-(*p*-tolyl)benzo[*d*]oxazole (**5i**)

**Ru method:** Following the typical procedure, 5-methyl-2-(*p*-tolyl)benzo[*d*]oxazole (111.6 mg, 0.5 mmol, 1.0 equiv), [(*p*-cymene)Ru(MeCN)<sub>3</sub>]<sub>2</sub> SbF<sub>6</sub> (14.6 mg, 5 mol%) and N-bromosuccinimide (106.8 mg, 0.6 mmol) in MeCN (5.0 mL) were employed to give the product **5i** (119.3 mg) in 79% yield as white solid.

**Rh method:** Following the typical procedure, 5-methyl-2-(*p*-tolyl)benzo[*d*]oxazole (111.6 mg, 0.5 mmol, 1.0 equiv), [RhCp\*(MeCN)<sub>3</sub>](SbF<sub>6</sub>)<sub>2</sub> (16.7 mg, 4 mol%) (14.6 mg, 5 mol%) and N-bromosuccinimide (106.8 mg, 0.6 mmol) in MeCN (5.0 mL) were employed to give the product **5i** (78.5 mg) in 52% yield as white solid.



**<sup>1</sup>H NMR (400 MHz, CDCl<sub>3</sub>):** δ 8.12 (d, J = 7.8 Hz, 2H), 7.78 (s, 1H), 7.62 (s, 1H), 7.34 (d, J = 7.7 Hz, 2H), 2.53 (s, 3H), 2.46 (s, 3H).

**<sup>13</sup>C NMR (101 MHz, CDCl<sub>3</sub>):** δ 163.68, 149.28, 142.21, 133.90, 129.57, 127.51, 125.85, 123.95, 120.60, 120.24, 119.63, 113.99, 109.71, 23.26, 21.56.

**HRMS (ESI):** m/z calcd. for C<sub>15</sub>H<sub>13</sub>BrNO [M+H]<sup>+</sup>: 302.0181, found: 302.0183.

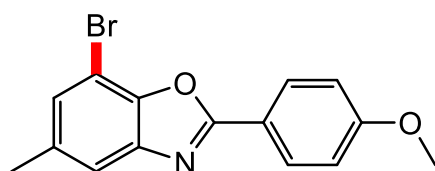

**7-bromo-2-(4-methoxyphenyl)-5-methylbenzo[d]oxazole (5j)**

**Ru method:** Following the typical procedure, 2-(4-methoxyphenyl)-5-methylbenzo[d]oxazole (119.6 mg, 0.5 mmol, 1.0 equiv), [(p-cymene)Ru(MeCN)<sub>3</sub>]<sub>2</sub> SbF<sub>6</sub> (14.6 mg, 5 mol%) and N-bromosuccinimide (106.8 mg, 0.6 mmol) in MeCN (5.0 mL) were employed to give the product **5j** (152.5 mg) in 96% yield as white solid.

**Rh method:** Following the typical procedure, 2-(4-methoxyphenyl)-5-methylbenzo[d]oxazole (119.6 mg, 0.5 mmol, 1.0 equiv), [RhCp\*(MeCN)<sub>3</sub>](SbF<sub>6</sub>)<sub>2</sub> (16.7 mg, 4 mol%) and N-bromosuccinimide (106.8 mg, 0.6 mmol) in MeCN (5.0 mL) were employed to give the product **5j** (76.2 mg) in 48% yield as white solid.

**<sup>1</sup>H NMR (400 MHz, CDCl<sub>3</sub>):** δ 8.14 (d, J = 7.6 Hz, 2H), 7.73 (s, 1H), 7.57 (s, 1H), 7.01 (d, J = 7.6 Hz, 2H), 3.89 (s, 3H), 2.50 (s, 3H).

**<sup>13</sup>C NMR (101 MHz, CDCl<sub>3</sub>):** δ 164.03, 162.85, 149.77, 142.31, 134.26, 130.09, 129.80, 129.65, 120.88, 120.35, 119.74, 114.76, 114.34, 55.81, 23.68.

**HRMS (ESI):** m/z calcd. for C<sub>15</sub>H<sub>13</sub>BrNO<sub>2</sub> [M+H]<sup>+</sup>: 318.0130, found: 318.0125.

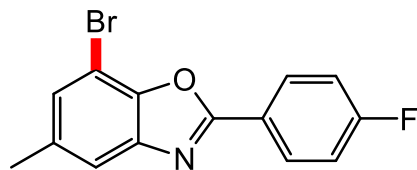

#### 7-bromo-2-(4-fluorophenyl)-5-methylbenzo[d]oxazole (**5k**)

Following the typical procedure, 2-(4-fluorophenyl)-5-methylbenzo[d]oxazole (113.6 mg, 0.5 mmol, 1.0 equiv), [(p-cymene)Ru(MeCN)<sub>3</sub>] SbF<sub>6</sub> (14.6 mg, 5 mol%) and N-bromosuccinimide (106.8 mg, 0.6 mmol) in MeCN (5.0 mL) were employed to give the product **5k** (140.8 mg) in 92% yield as white solid.

**<sup>1</sup>H NMR (400 MHz, CDCl<sub>3</sub>):** δ 8.21 (dd, J = 7.9, 5.7 Hz, 2H), 7.76 (s, 1H), 7.60 (s, 1H), 7.21 (t, J = 8.4 Hz, 2H), 2.52 (s, 3H).

**<sup>13</sup>C NMR (101 MHz, CDCl<sub>3</sub>):** δ 164.91 (d, J = 253.1 Hz), 149.45, 141.67, 134.25, 129.88 (d, J = 8.9 Hz), 123.18, 120.85, 120.68, 116.24 (d, J = 22.2 Hz), 114.18, 23.38.

**<sup>19</sup>F NMR (376 MHz, CDCl<sub>3</sub>):** δ -106.96, -106.97, -106.98, -107.00, -107.01.

**HRMS (ESI):** m/z calcd. for C<sub>14</sub>H<sub>10</sub>BrFNO [M+H]<sup>+</sup>: 305.9930, found: 305.9934.

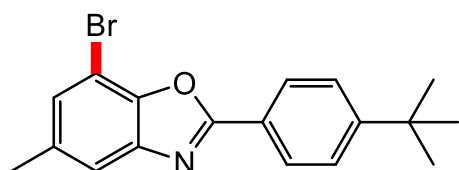

#### 7-bromo-2-(4-(tert-butyl)phenyl)-5-methylbenzo[d]oxazole (**5y**)

Following the typical procedure, 2-(4-(tert-butyl)phenyl)-5-methylbenzo[d]oxazole (131.7 mg, 0.5 mmol, 1.0 equiv), [RhCp\*(MeCN)<sub>3</sub>](SbF<sub>6</sub>)<sub>2</sub> (16.7 mg, 4 mol%) and N-bromosuccinimide (106.8 mg, 0.6 mmol) in DCE (5.0 mL) were employed to give the product **5y** (84.5 mg) in 49% yield as white solid.

**<sup>1</sup>H NMR (400 MHz, CDCl<sub>3</sub>):** δ 8.20 (d, J = 8.3 Hz, 2H), 7.53 (d, J = 8.3 Hz, 2H), 7.40 (d, J = 8.2 Hz, 1H), 7.23 (d, J = 8.2 Hz, 1H), 2.58 (s, 3H), 1.37 (s, 9H).

**<sup>13</sup>C NMR (101 MHz, CDCl<sub>3</sub>):** δ 212.89, 155.38, 147.09, 137.75, 127.77, 126.05, 125.80, 124.04, 110.00, 109.55, 77.33, 77.02, 76.70, 35.10, 31.16, 27.27.

**HRMS (ESI):** m/z calcd. for C<sub>15</sub>H<sub>12</sub>BrNOH [M+H]<sup>+</sup>: 344.0650, found: 344.0649

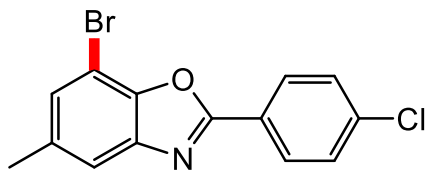

### 2-(4-chlorophenyl)-7-bromo-5-methylbenzo[d]oxazole (**5z**)

Following the typical procedure, 2-(4-chlorophenyl)-5-methylbenzo[d]oxazole (121.6 mg, 0.5 mmol, 1.0 equiv), [RhCp\*(MeCN)<sub>3</sub>](SbF<sub>6</sub>)<sub>2</sub> (16.7 mg, 4 mol%) and N-bromosuccinimide (106.8 mg, 0.6 mmol) in DCE (5.0 mL) were employed to give the product **5z** (75.5 mg) in 47% yield as white solid.

**<sup>1</sup>H NMR (400 MHz, CDCl<sub>3</sub>):** δ 8.16 (d, J = 8.4 Hz, 2H), 7.79 (s, 1H), 7.62 (s, 1H), 7.51 (d, J = 8.4 Hz, 2H), 2.53 (d, J = 4.5 Hz, 3H).

**<sup>13</sup>C NMR (101 MHz, CDCl<sub>3</sub>):** δ 164.03, 162.85, 149.77, 142.31, 134.26, 130.09, 129.80, 129.65, 120.88, 120.35, 119.74, 114.76, 114.34, 55.81, 23.68.

**HRMS (ESI):** m/z calcd. for C<sub>14</sub>H<sub>10</sub>BrClNO [M+H]<sup>+</sup>: 321.9634, found: 321.9633.

### 3-4 C7-iodinated products

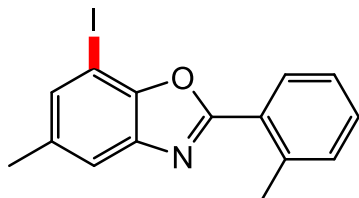

### 7-Iodo-5-methyl-2-(*o*-tolyl)benzo[d]oxazole (**6a**)

Following the typical procedure, 5-methyl-2-(*o*-tolyl)benzo[d]oxazole (111.6 mg, 0.5 mmol, 1.0 equiv), [(*p*-cymene)Ru(MeCN)<sub>3</sub>]<sub>2</sub> SbF<sub>6</sub> (14.6 mg, 5 mol%) and N-iodosuccinimide (135.0 mg, 0.6 mmol) in MeCN (5.0 mL) were employed to give the product **6a** (130.4 mg) in 75% yield as white solid.

**<sup>1</sup>H NMR (400 MHz, CDCl<sub>3</sub>):** δ 8.14 (d, J = 7.5 Hz, 1H), 7.79 (s, 1H), 7.65 (s, 1H), 7.41 (d, J = 7.1 Hz, 1H), 7.34 (d, J = 6.9 Hz, 2H), 2.79 (s, 3H), 2.51 (d, J = 7.5 Hz, 3H).

**<sup>13</sup>C NMR (101 MHz, CDCl<sub>3</sub>):** <sup>13</sup>C NMR (101 MHz, CDCl<sub>3</sub>) δ 149.04, 141.80, 138.97, 133.90, 131.86, 131.75, 131.09, 130.77, 129.92, 126.11, 121.05, 114.11, 109.83, 23.35, 22.23.

**HRMS (ESI):** m/z calcd. for C<sub>15</sub>H<sub>13</sub>INO [M+H]<sup>+</sup>: 350.0042, found: 350.0041.

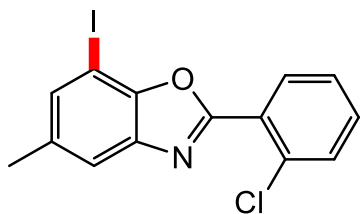

### 2-(2-chlorophenyl)-7-iodo-5-methylbenzo[d]oxazole (**6c**)

Following the typical procedure, 2-(2-chlorophenyl)-5-methylbenzo[d]oxazole (121.8 mg, 0.5 mmol, 1.0 equiv), [(p-cymene)Ru(MeCN)<sub>3</sub>]<sub>2</sub> SbF<sub>6</sub> (14.6 mg, 5 mol%) and N-iodosuccinimide (135.0 mg, 0.6 mmol) in MeCN (5.0 mL) were employed to give the product **6c** (130.0 mg) in 70% yield as white solid.

<sup>1</sup>H NMR (400 MHz, CDCl<sub>3</sub>): δ 8.17 – 8.13 (m, 1H), 8.13 (s, 1H), 7.75 (s, 1H), 7.59 (d, J = 7.8 Hz, 1H), 7.48 (dd, J = 12.0, 4.2 Hz, 1H), 7.44 (t, J = 7.6 Hz, 1H), 2.60 (s, 3H).

<sup>13</sup>C NMR (101 MHz, CDCl<sub>3</sub>): <sup>13</sup>C NMR (101 MHz, CDCl<sub>3</sub>) δ 161.29, 149.39, 142.36, 137.40, 133.58, 132.10, 131.84, 131.48, 131.24, 126.98, 125.94, 120.62, 120.38, 28.52.

HRMS (ESI): m/z calcd. for C<sub>14</sub>H<sub>10</sub>ClINO [M+H]<sup>+</sup>: 353.9792, found: 353.9788.

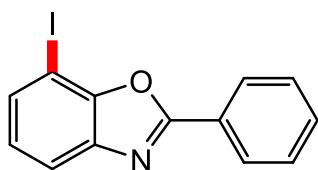

### 7-iodo-2-phenylbenzo[d]oxazole (**6d**)

Following the typical procedure, 2-phenylbenzo[d]oxazole (97.6 mg, 0.5 mmol, 1.0 equiv), [(p-cymene)Ru(MeCN)<sub>3</sub>]<sub>2</sub> SbF<sub>6</sub> (14.6 mg, 5 mol%) and N-iodosuccinimide (135.0 mg, 0.6 mmol) in MeCN (5.0 mL) were employed to give the product **6d** (136.5 mg) in 85% yield as white solid.

<sup>1</sup>H NMR (400 MHz, CDCl<sub>3</sub>): δ 8.25 (d, J = 6.9 Hz, 2H), 7.76 (s, 1H), 7.64 (d, J = 8.4 Hz, 1H), 7.57 (t, J = 10.2 Hz, 3H), 7.49 (d, J = 8.4 Hz, 1H).

<sup>13</sup>C NMR (101 MHz, CDCl<sub>3</sub>): δ 163.56, 151.24, 141.35, 131.85, 128.99, 128.04, 127.72, 126.69, 120.96, 117.98, 114.13.

HRMS (ESI): m/z calcd. for C<sub>13</sub>H<sub>9</sub>INO [M+H]<sup>+</sup>: 321.9729, found: 321.9726.

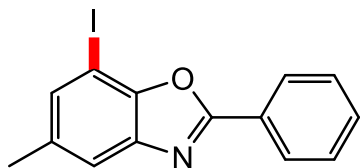

#### 7-iodo-5-methyl-2-phenylbenzo[d]oxazole (**6e**)

Following the typical procedure, 5-methyl-2-phenylbenzo[d]oxazole (104.6 mg, 0.5 mmol, 1.0 equiv), [(p-cymene)Ru(MeCN)<sub>3</sub>]<sub>2</sub> SbF<sub>6</sub> (14.6 mg, 5 mol%) and N-iodosuccinimide (135.0 mg, 0.6 mmol) in MeCN (5.0 mL) were employed to give the product **6e** (134.5 mg) in 80% yield as white solid.

**<sup>1</sup>H NMR (400 MHz, CDCl<sub>3</sub>):** δ 8.21 (d, J = 6.7 Hz, 2H), 7.77 (s, 1H), 7.61 (s, 1H), 7.53 (t, J = 9.5 Hz, 3H), 2.51 (s, 3H).

**<sup>13</sup>C NMR (101 MHz, CDCl<sub>3</sub>):** δ 163.52, 149.49, 141.77, 134.14, 131.69, 128.94, 127.67, 126.89, 120.91, 120.66, 114.22, 23.38.

**HRMS (ESI):** m/z calcd. for C<sub>14</sub>H<sub>11</sub>INO [M+H]<sup>+</sup>: 335.9886, found: 335.9886.

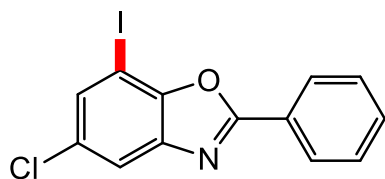

#### 5-chloro-7-iodo-2-phenylbenzo[d]oxazole (**6f**)

Following the typical procedure, 5-chloro-2-phenylbenzo[d]oxazole (114.8 mg, 0.5 mmol, 1.0 equiv), [(p-cymene)Ru(MeCN)<sub>3</sub>]<sub>2</sub> SbF<sub>6</sub> (14.6 mg, 5 mol%) and N-iodosuccinimide (135.0 mg, 0.6 mmol) in MeCN (5.0 mL) were employed to give the product **6f** (115.7 mg) in 65% yield as white solid.

**<sup>1</sup>H NMR (400 MHz, CDCl<sub>3</sub>):** δ 8.21 (d, J = 7.2 Hz, 2H), 7.86 (s, 2H), 7.61 – 7.50 (m, 3H).

**<sup>13</sup>C NMR (101 MHz, CDCl<sub>3</sub>):** δ 164.72, 149.61, 142.58, 132.24, 130.56, 129.07, 127.89, 126.31, 120.93, 118.19, 115.40.

**HRMS (ESI):** m/z calcd. for C<sub>13</sub>H<sub>8</sub>ClINO [M+H]<sup>+</sup>: 355.9339, found: 355.9337.

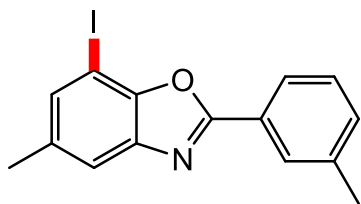

#### 7-iodo-5-methyl-2-(*m*-tolyl)benzo[*d*]oxazole (**6h**)

Following the typical procedure, 5-methyl-2-(*m*-tolyl)benzo[*d*]oxazole (111.6 mg, 0.5 mmol, 1.0 equiv), [(*p*-cymene)Ru(MeCN)<sub>3</sub>]<sub>2</sub> SbF<sub>6</sub> (14.6 mg, 5 mol%) and N-iodosuccinimide (135.0 mg, 0.6 mmol) in MeCN (5.0 mL) were employed to give the product **6h** (124.8 mg) in 71% yield as white solid.

**<sup>1</sup>H NMR (400 MHz, CDCl<sub>3</sub>):** δ 8.05 (s, 1H), 8.01 (d, J = 7.6 Hz, 1H), 7.58 (s, 2H), 7.40 (t, J = 7.5 Hz, 1H), 7.35 (d, J = 7.5 Hz, 1H), 2.48 (s, 3H), 2.45 (s, 3H).

**<sup>13</sup>C NMR (101 MHz, CDCl<sub>3</sub>):** δ 163.82, 149.29, 141.30, 141.13, 138.80, 132.51, 130.92, 128.85, 128.19, 126.78, 124.79, 120.92, 111.09, 21.33, 20.56.

**HRMS (ESI):** m/z calcd. for C<sub>15</sub>H<sub>13</sub>INO [M+H]<sup>+</sup>: 350.0042, found: 350.0044.

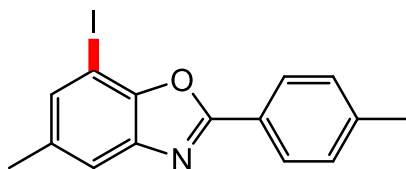

#### 7-iodo-5-methyl-2-(*p*-tolyl)benzo[*d*]oxazole (**6i**)

**Ru method:** Following the typical procedure, 5-methyl-2-(*p*-tolyl)benzo[*d*]oxazole (111.6 mg, 0.5 mmol, 1.0 equiv), [(*p*-cymene)Ru(MeCN)<sub>3</sub>]<sub>2</sub> SbF<sub>6</sub> (14.6 mg, 5 mol%) and N-iodosuccinimide (135.0 mg, 0.6 mmol) in MeCN (5.0 mL) were employed to give the product **6i** (142.2 mg) in 81% yield as white solid.

**Rh method:** Following the typical procedure, 5-methyl-2-(*p*-tolyl)benzo[*d*]oxazole (111.6 mg, 0.5 mmol, 1.0 equiv), [RhCp\*(MeCN)<sub>3</sub>](SbF<sub>6</sub>)<sub>2</sub> (16.7 mg, 4 mol%) and N-iodosuccinimide (135.0 mg, 0.6 mmol) in MeCN (5.0 mL) were employed to give the product **6i** (107.1 mg) in 61% yield as white solid.

**<sup>1</sup>H NMR (400 MHz, CDCl<sub>3</sub>):** δ 8.11 (d, J = 7.9 Hz, 1H), 8.04 (s, 1H), 7.63 (s, 1H), 7.32 (s, 2H), 2.56 (s, 3H), 2.44 (s, 3H).

**<sup>13</sup>C NMR (101 MHz, CDCl<sub>3</sub>):** δ 163.51, 149.37, 142.23, 136.98, 129.56, 127.55, 125.84, 123.90, 120.18, 119.66, 109.71, 94.67, 28.37, 21.57.

**HRMS (ESI):** m/z calcd. for C<sub>15</sub>H<sub>12</sub>INONa [M+Na]<sup>+</sup>: 371.9861, found: 371.9869.

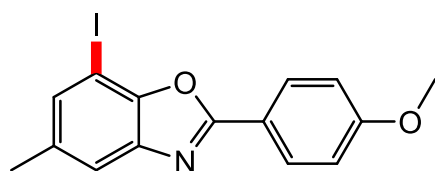

### 7-iodo-2-(4-methoxyphenyl)-5-methylbenzo[d]oxazole (**6j**)

**Ru method:** Following the typical procedure, 2-(4-methoxyphenyl)-5-methylbenzo[d]oxazole (119.6 mg, 0.5 mmol, 1.0 equiv), [(p-cymene)Ru(MeCN)<sub>3</sub>]<sub>2</sub> SbF<sub>6</sub> (14.6 mg, 5 mol%) and N-iodosuccinimide (135.0 mg, 0.6 mmol) in MeCN (5.0 mL) were employed to give the product **6j** (173.0 mg) in 95% yield as white solid.

**Rh method:** Following the typical procedure, 2-(4-methoxyphenyl)-5-methylbenzo[d]oxazole (119.6 mg, 0.5 mmol, 1.0 equiv), [(p-cymene)Ru(MeCN)<sub>3</sub>]<sub>2</sub> SbF<sub>6</sub> (14.6 mg, 5 mol%) and N-iodosuccinimide (135.0 mg, 0.6 mmol) in MeCN (5.0 mL) were employed to give the product **6j** (92.9 mg) in 51% yield as white solid.

**<sup>1</sup>H NMR (400 MHz, CDCl<sub>3</sub>):** δ 8.15 (d, J = 8.7 Hz, 2H), 8.00 (s, 1H), 7.60 (s, 1H), 7.01 (d, J = 8.7 Hz, 2H), 3.88 (d, J = 8.7 Hz, 3H), 2.54 (s, 3H).

**<sup>13</sup>C NMR (101 MHz, CDCl<sub>3</sub>):** δ 162.51, 136.95, 129.46, 125.58, 120.13, 119.58, 119.35, 115.77, 114.37, 109.95, 94.21, 55.39, 28.33.

**HRMS (ESI):** m/z calcd. for C<sub>15</sub>H<sub>12</sub>INO<sub>2</sub>Na [M+Na]<sup>+</sup>: 387.9810, found: 387.9815.

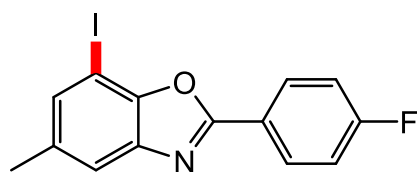

### 2-(4-fluorophenyl)-7-iodo-5-methylbenzo[d]oxazole (**6k**)

Following the typical procedure, 2-(4-fluorophenyl)-5-methylbenzo[d]oxazole (113.6 mg, 0.5 mmol, 1.0 equiv), [(p-cymene)Ru(MeCN)<sub>3</sub>]<sub>2</sub> SbF<sub>6</sub> (14.6 mg, 5 mol%) and N-

iodosuccinimide (135.0 mg, 0.6 mmol) in MeCN (5.0 mL) were employed to give the product **6k** (167.2 mg) in 95% yield as white solid.

**<sup>1</sup>H NMR (400 MHz, CDCl<sub>3</sub>):** δ 8.22 (dd, J = 8.6, 5.1 Hz, 2H), 8.03 (d, J = 4.4 Hz, 1H), 7.62 (d, J = 3.6 Hz, 1H), 7.20 (td, J = 8.7, 2.7 Hz, 2H), 2.55 (d, J = 2.8 Hz, 3H).

**<sup>13</sup>C NMR (101 MHz, CDCl<sub>3</sub>):** δ 164.96 (d, J = 253.4 Hz), 149.58, 142.74, 137.38, 129.96 (d, J = 8.8 Hz), 123.18, 120.41, 119.93, 116.26 (d, J = 22.2 Hz), 105.27, 95.13, 28.50.

**<sup>19</sup>F NMR (376 MHz, CDCl<sub>3</sub>):** δ -106.91, -106.92, -106.92, -106.93, -106.94, -106.95, -106.95.

**HRMS (ESI):** m/z calcd. for C<sub>14</sub>H<sub>10</sub>FINO [M+H]<sup>+</sup>: 353.9792, found: 353.9789.

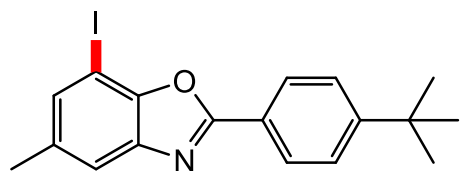

#### **7-iodo-2-(4-(tert-butyl)phenyl)-5-methylbenzo[d]oxazole (6y)**

Following the typical procedure, 2-(4-(tert-butyl)phenyl)-5-methylbenzo[d]oxazole (131.6 mg, 0.5 mmol, 1.0 equiv), [RhCp\*(MeCN)<sub>3</sub>](SbF<sub>6</sub>)<sub>2</sub> (16.7 mg, 4 mol%) and N-iodosuccinimide (70.8 mg, 0.6 mmol) in DCE (5.0 mL) were employed to give the product **6y** (111.1 mg) in 57% yield as white solid.

**<sup>1</sup>H NMR (400 MHz, CDCl<sub>3</sub>):** δ 8.20 (d, J = 8.3 Hz, 2H), 7.53 (d, J = 8.3 Hz, 2H), 7.40 (d, J = 8.2 Hz, 1H), 7.23 (d, J = 8.2 Hz, 1H), 2.58 (s, 3H), 1.37 (s, 9H).

**<sup>13</sup>C NMR (101 MHz, CDCl<sub>3</sub>):** δ 212.89, 155.38, 147.09, 137.75, 127.77, 126.05, 125.80, 124.04, 110.00, 109.55, 77.33, 77.02, 76.70, 35.10, 31.16, 27.27.

**HRMS (ESI):** m/z calcd. for C<sub>15</sub>H<sub>12</sub>INOH [M+H]<sup>+</sup>: 392.2605, found: 392.2610.

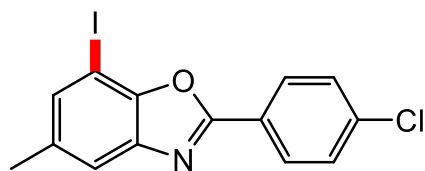

#### **2-(4-chlorophenyl)-7-iodo-5-methylbenzo[d]oxazole (6z)**



Following the typical procedure, 2-(4-chlorophenyl)-5-methylbenzo[*d*]oxazole (121.8 mg, 0.5 mmol, 1.0 equiv), [RhCp\*(MeCN)<sub>3</sub>](SbF<sub>6</sub>)<sub>2</sub> (16.7 mg, 4 mol%) and N-iodosuccinimide (70.8 mg, 0.6 mmol) in DCE (5.0 mL) were employed to give the product **6z** (90.6 mg) in 49% yield as white solid.

**<sup>1</sup>H NMR (400 MHz, CDCl<sub>3</sub>):** δ 8.15 (d, J = 8.6 Hz, 2H), 8.05 (s, 1H), 7.64 (s, 1H), 7.50 (d, J = 8.6 Hz, 2H), 2.54 (d, J = 14.5 Hz, 3H).

**<sup>13</sup>C NMR (101 MHz, CDCl<sub>3</sub>):** δ 164.03, 162.85, 149.77, 142.31, 134.26, 130.09, 129.80, 129.65, 120.88, 120.35, 119.74, 114.76, 114.34, 55.81, 23.68.

**HRMS (ESI):** m/z calcd. for C<sub>14</sub>H<sub>9</sub>INONa [M+Na]<sup>+</sup>: 391.9315, found: 391.9312.

### 3-5 C7-Chlorinated products

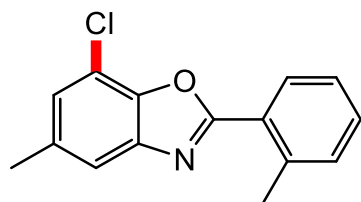

#### 7-chloro-5-methyl-2-(*o*-tolyl)benzo[*d*]oxazole (**7a**)

Following the typical procedure, 5-methyl-2-(*o*-tolyl)benzo[*d*]oxazole (111.6 mg, 0.5 mmol, 1.0 equiv), [(*p*-cymene)Ru(MeCN)<sub>3</sub>]<sub>2</sub> SbF<sub>6</sub> (14.6 mg, 5 mol%) and N-chlorosuccinimide (135.0 mg, 0.6 mmol) in MeCN (5.0 mL) were employed to give the product **7a** (107.0 mg) in 83% yield as white solid.

**<sup>1</sup>H NMR (400 MHz, CDCl<sub>3</sub>):** δ 8.13 (d, J = 7.9 Hz, 1H), 7.62 (s, 1H), 7.58 (s, 1H), 7.44 – 7.37 (m, 1H), 7.37 – 7.30 (m, 2H), 2.79 (s, 3H), 2.48 (s, 3H).

**<sup>13</sup>C NMR (101 MHz, CDCl<sub>3</sub>):** δ 163.89, 148.81, 141.14, 138.93, 132.34, 131.84, 131.04, 130.91, 129.88, 126.09, 125.92, 121.11, 111.00, 22.26, 20.56.

**HRMS (ESI):** m/z calcd. for C<sub>15</sub>H<sub>13</sub>ClNO [M+H]<sup>+</sup>: 258.0686, found: 258.0691.

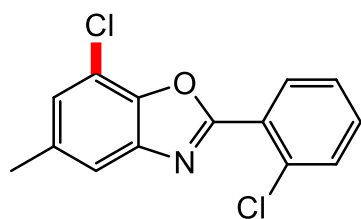

#### 7-chloro-2-(2-chlorophenyl)-5-methylbenzo[*d*]oxazole (**7c**)

Following the typical procedure, 2-(2-chlorophenyl)-5-methylbenzo[*d*]oxazole (121.8 mg, 0.5 mmol, 1.0 equiv), [(*p*-cymene)Ru(MeCN)<sub>3</sub>]<sub>2</sub> SbF<sub>6</sub> (14.6 mg, 5 mol%) and N-chlorosuccinimide (135.0 mg, 0.6 mmol) in MeCN (5.0 mL) were employed to give the product **7c** (130.9 mg) in 75% yield as white solid.

**<sup>1</sup>H NMR (400 MHz, CDCl<sub>3</sub>):** δ 8.12 (d, *J* = 7.6 Hz, 1H), 7.68 (s, 1H), 7.64 (s, 1H), 7.57 (d, *J* = 7.7 Hz, 1H), 7.49 – 7.38 (m, 2H), 2.50 (s, 3H).

**<sup>13</sup>C NMR (101 MHz, CDCl<sub>3</sub>):** δ 161.47, 149.12, 140.68, 133.53, 132.80, 132.05, 131.79, 131.61, 131.46, 126.96, 125.99, 121.43, 111.28, 20.60.

**HRMS (ESI):** *m/z* calcd. for C<sub>15</sub>H<sub>13</sub>ClNO [M+H]<sup>+</sup>: 278.0140, found: 278.0141.

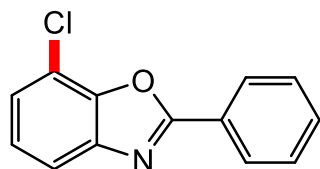

#### 7-chloro-2-phenylbenzo[*d*]oxazole (**7d**)

Following the typical procedure, 2-phenylbenzo[*d*]oxazole 97.6 mg, 0.5 mmol, 1.0 equiv), [(*p*-cymene)Ru(MeCN)<sub>3</sub>]<sub>2</sub> SbF<sub>6</sub> (14.6 mg, 5 mol%) and N-chlorosuccinimide (135.0 mg, 0.6 mmol) in MeCN (5.0 mL) were employed to give the product **7d** (91.2 mg) in 79% yield as white solid.

**<sup>1</sup>H NMR (400 MHz, CDCl<sub>3</sub>):** δ 8.25 (d, *J* = 6.9 Hz, 2H), 7.76 (s, 1H), 7.64 (d, *J* = 8.4 Hz, 1H), 7.57 (t, *J* = 10.2 Hz, 3H), 7.49 (d, *J* = 8.4 Hz, 1H).

**<sup>13</sup>C NMR (101 MHz, CDCl<sub>3</sub>):** δ 163.56, 151.24, 141.35, 131.85, 128.99, 128.04, 127.72, 126.69, 120.96, 117.98, 114.13.

**HRMS (ESI):** *m/z* calcd. for C<sub>13</sub>H<sub>9</sub>ClNO [M+H]<sup>+</sup>: 230.0373, found: 237.0370.

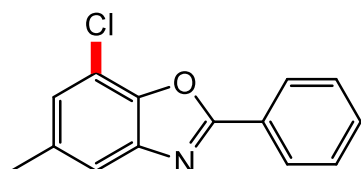

#### 7-chloro-5-methyl-2-(*o*-tolyl)benzo[*d*]oxazole (**7e**)

Following the typical procedure, 7-chloro-5-methyl-2-phenylbenzo[*d*]oxazole (104.6 mg, 0.5 mmol, 1.0 equiv), [(*p*-cymene)Ru(MeCN)<sub>3</sub>]<sub>2</sub> SbF<sub>6</sub> (14.6 mg, 5 mol%) and N-

chlorosuccinimide (135.0 mg, 0.6 mmol) in MeCN (5.0 mL) were employed to give the product **7e** (118.4 mg) in 97% yield as white solid.

**<sup>1</sup>H NMR (400 MHz, CDCl<sub>3</sub>):** δ 8.22 – 8.16 (m, 2H), 7.58 (s, 1H), 7.56 (s, 1H), 7.53 – 7.47 (m, 3H), 2.46 (s, 3H).

**<sup>13</sup>C NMR (101 MHz, CDCl<sub>3</sub>):** δ 163.57, 149.28, 141.09, 132.61, 131.65, 130.99, 128.93, 127.62, 126.90, 120.96, 111.12, 20.57.

**HRMS (ESI):** m/z calcd. for C<sub>14</sub>H<sub>11</sub>ClNO [M+H]<sup>+</sup>: 244.0530, found: 244.0526.

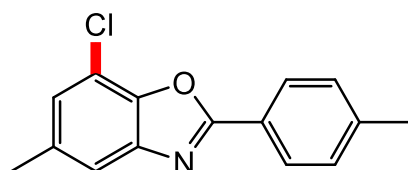

#### 7-chloro-5-methyl-2-(p-tolyl)benzo[d]oxazole (**7i**)

Following the typical procedure, 5-methyl-2-(p-tolyl)benzo[d]oxazole (111.6 mg, 0.5 mmol, 1.0 equiv), [(p-cymene)Ru(MeCN)<sub>3</sub>]<sub>2</sub> SbF<sub>6</sub> (14.6 mg, 5 mol%) and N-chlorosuccinimide (135.0 mg, 0.6 mmol) in MeCN (5.0 mL) were employed to give the product **7i** (97.0 mg) in 75% yield as white solid.

**<sup>1</sup>H NMR (400 MHz, CDCl<sub>3</sub>):** δ 8.12 (d, J = 7.8 Hz, 2H), 7.78 (s, 1H), 7.62 (s, 1H), 7.34 (d, J = 7.7 Hz, 2H), 2.53 (s, 3H), 2.46 (s, 3H).

**<sup>13</sup>C NMR (101 MHz, CDCl<sub>3</sub>):** δ 163.68, 149.28, 142.21, 133.90, 129.57, 127.51, 125.85, 123.95, 120.60, 120.24, 119.63, 113.99, 109.71, 23.26, 21.56.

**HRMS (ESI):** m/z calcd. for C<sub>15</sub>H<sub>13</sub>ClNO [M+H]<sup>+</sup>: 258.0686, found: 258.0689.

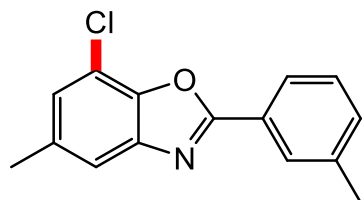

#### 7-chloro-5-methyl-2-(m-tolyl)benzo[d]oxazole (**7h**)

Following the typical procedure, 5-methyl-2-(m-tolyl)benzo[d]oxazole (111.6 mg, 0.5 mmol, 1.0 equiv), [(p-cymene)Ru(MeCN)<sub>3</sub>]<sub>2</sub> SbF<sub>6</sub> (14.6 mg, 5 mol%) and N-chlorosuccinimide

(135.0 mg, 0.6 mmol) in MeCN (5.0 mL) were employed to give the product **7h** (117.7 mg) in 91% yield as white solid.

**<sup>1</sup>H NMR (400 MHz, CDCl<sub>3</sub>):** δ 8.05 (s, 1H), 8.01 (d, J = 7.6 Hz, 1H), 7.58 (s, 2H), 7.40 (t, J = 7.5 Hz, 1H), 7.35 (d, J = 7.5 Hz, 1H), 2.48 (s, 3H), 2.45 (s, 3H).

**<sup>13</sup>C NMR (101 MHz, CDCl<sub>3</sub>):** δ 163.82, 149.29, 141.30, 141.13, 138.80, 132.51, 130.92, 128.85, 128.19, 126.78, 124.79, 120.92, 111.09, 21.33, 20.56.

**HRMS (ESI):** m/z calcd. for C<sub>15</sub>H<sub>13</sub>ClNO [M+H]<sup>+</sup>: 258.0686, found: 258.0687.

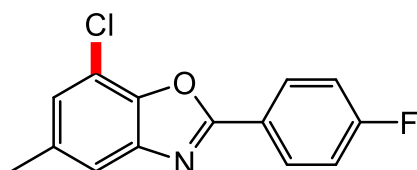

#### 7-chloro-2-(4-fluorophenyl)-5-methylbenzo[d]oxazole (**7k**)

Following the typical procedure, 2-(4-fluorophenyl)-5-methylbenzo[d]oxazole (113.6 mg, 0.5 mmol, 1.0 equiv), [(p-cymene)Ru(MeCN)<sub>3</sub>]<sub>2</sub> SbF<sub>6</sub> (14.6 mg, 5 mol%) and N-chlorosuccinimide (135.0 mg, 0.6 mmol) in MeCN (5.0 mL) were employed to give the product **7k** (85.4 mg) in 65% yield as white solid.

**<sup>1</sup>H NMR (400 MHz, CDCl<sub>3</sub>):** δ 8.26 (dd, J = 7.7, 5.6 Hz, 2H), 7.37 (d, J = 8.2 Hz, 1H), 7.19 (dd, J = 18.4, 8.7 Hz, 3H), 2.56 (s, 3H).

**<sup>13</sup>C NMR (101 MHz, CDCl<sub>3</sub>):** δ 164.95 (d, J = 253.1 Hz), 162.06, 147.10, 145.36, 138.00, 130.16 (d, J = 8.9 Hz), 126.34, 123.16, 116.12 (d, J = 22.2 Hz), 109.61, 91.13, 27.26.

**<sup>19</sup>F NMR (376 MHz, CDCl<sub>3</sub>):** δ -106.99, -107.01, -107.01, -107.03, -107.04, -107.05, -107.06.

**HRMS (ESI):** m/z calcd. for C<sub>14</sub>H<sub>10</sub>ClFNO [M+H]<sup>+</sup>: 262.0435, found: 262.0439.

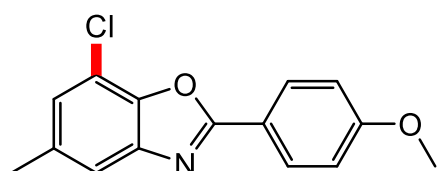

#### 7-chloro-2-(4-methoxyphenyl)-5-methylbenzo[d]oxazole (**7j**)

Following the typical procedure, 2-(4-methoxyphenyl)-5-methylbenzo[d]oxazole (119.6 mg, 0.5 mmol, 1.0 equiv), [(p-cymene)Ru(MeCN)<sub>3</sub>]<sub>2</sub> SbF<sub>6</sub> (14.6 mg, 5 mol%) and N-

chlorosuccinimide (135.0 mg, 0.6 mmol) in MeCN (5.0 mL) were employed to give the product **7j** (132.0 mg) in 96% yield as white solid.

**<sup>1</sup>H NMR (400 MHz, CDCl<sub>3</sub>):** δ 8.15 (d, J = 7.7 Hz, 2H), 7.55 (s, 2H), 7.02 (d, J = 7.8 Hz, 2H), 3.89 (s, 3H), 2.47 (s, 3H).

**<sup>13</sup>C NMR (101 MHz, CDCl<sub>3</sub>):** δ 163.75 162.47, 149.24, 141.32, 132.37, 130.39, 129.42, 120.79, 120.61, 119.45, 114.41, 110.93, 55.47, 20.54.

**HRMS (ESI):** m/z calcd. for C<sub>15</sub>H<sub>13</sub>CINO<sub>2</sub> [M+H]<sup>+</sup>: 274.0635, found: 274.0634.

#### 4. Crystallographic Data

| Identification code                             | <b>Ru-1i</b>                                                       |
|-------------------------------------------------|--------------------------------------------------------------------|
| CCDC Number                                     | 1904128                                                            |
| Empirical formula                               | C <sub>27</sub> H <sub>29</sub> F <sub>6</sub> N <sub>2</sub> OPRu |
| <i>M<sub>r</sub></i>                            | 643.56                                                             |
| Crystal system                                  | Triclinic                                                          |
| Space group                                     | P-1                                                                |
| <i>a</i> [Å]                                    | 10.7138(3)                                                         |
| <i>b</i> [Å]                                    | 10.8978(3)                                                         |
| <i>c</i> [Å]                                    | 12.0990(3)                                                         |
| <i>α</i> [°]                                    | 92.7480(10)                                                        |
| <i>β</i> [°]                                    | 96.7020(10)                                                        |
| <i>γ</i> [°]                                    | 90.4760(10)                                                        |
| <i>V</i> [Å <sup>3</sup> ]                      | 1401.24(7)                                                         |
| <i>Z</i>                                        | 2                                                                  |
| <i>ρ</i> <sub>calc</sub> [mg·mm <sup>-3</sup> ] | 1.525                                                              |
| <i>μ</i> [mm <sup>-1</sup> ]                    | 3.783                                                              |
| <i>F</i> [000]                                  | 652                                                                |
| <i>T</i> [K]                                    | 296(2)                                                             |
| <i>θ</i> range [°]                              | 3.204 to 58.144                                                    |
| reflns collected/indep reflns                   | 40468/5953                                                         |
| <i>R</i> <sub>(int)</sub>                       | 0.0258                                                             |
| data / restraints / params                      | 5953 / 72 / 404                                                    |
| GOF                                             | 1.053                                                              |
| <i>R</i> <sub>1</sub> (I > 2σ(I))               | 0.0242                                                             |
| <i>wR</i> <sub>2</sub>                          | 0.0659                                                             |

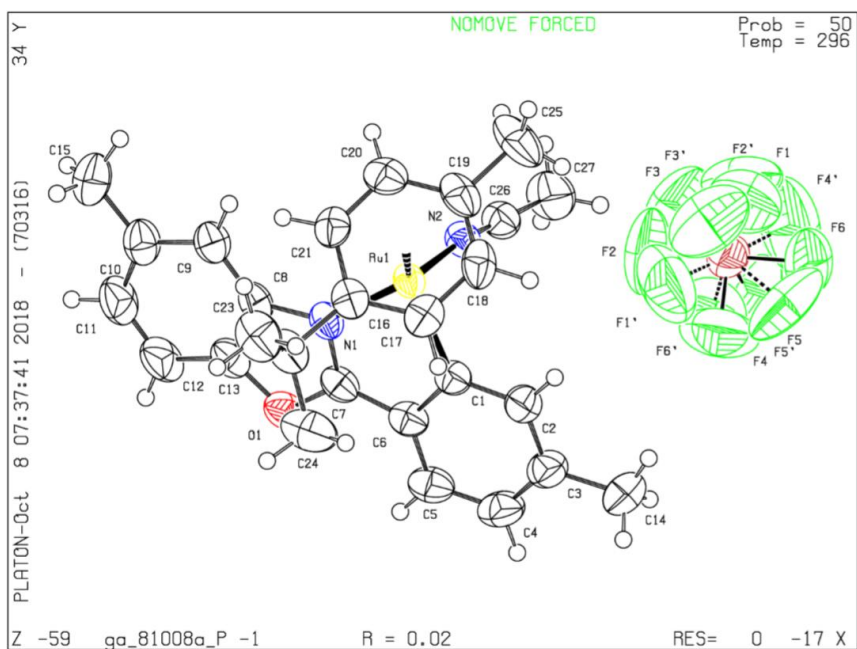

## 5. Theoretical Calculations

B3LYP<sup>3</sup> level of density functional theory (DFT) calculations were carried out using Gaussian 09 software package<sup>4</sup>. The LanI2DZ pseudopotential<sup>5</sup> basis set is used for Rh and Br, and the standard 6-31G(d) basis set for other atoms. The NBO program in Gaussian 09, Version 5.9, was used to obtain more information about some special bonds.<sup>6</sup> Truhlar and coworkers' SMD solvation model was employed to consider the solvent effect of dichloroethane<sup>7</sup>. In addition, introduced in the DFT by Parr and Yang, the condensed Fukui function is the most important local reactivity index<sup>8</sup>. It has become a valuable tool to deal with the site selectivity in a wide range of organic reactions<sup>9</sup>. For the free radical attack of the atom site  $k$  of the molecule, the condensed Fukui function is defined as the following equation in terms of the atomic charges:

$$f_k^0 = [q_k(N+1) - q_k(N-1)]/2$$

Electrophilic-aromatic-substitution-like ( $S_EAr$ -like) reaction mechanism<sup>10</sup> was examined theoretically as well, and four pathways (Path1-4) were located. The reaction of an electrophilic Br with an electron-rich, nucleophilic aromatic ring is involved in the C-H bond cleavage. And the rate-determining steps are activation of Br atom except Path4. Br adds to  $\alpha$ -carbon of aromatic ring attached to benzo[*a*]oxazole via different intermediates (**E** and **E'** )

in Path1 and Path2. However, in Path3 and Path4,  $\beta$ -carbon of the aromatic ring is the attacked site of Br atom, the sequence of 1,2-Br shift and proton elimination differentiate the two pathways. The most preferred pathway out of four is Path1 shown in **Figure S3**. The total barrier height is 39.6 kcal/mol which makes this way far less favorable than the substitution mechanism.

On the basis of the experimental observations, a plausible free radical mechanism to rationalize the remote-halogenation is presented in **Scheme S1**. First, an intermolecular SET from Rh(III) complex **K** to NBS leads to the formation of Rh(IV) complex **L** and a Br radical. Then, a nucleophilic addition of Br radical to intermediate **L** generates the intermediate **M**. Finally, abstraction a proton of **M** with pyrrolidine-2,5-dione anion and ligand exchange provides product **L** along with the regeneration of intermediate **K**.

**Scheme S1** The plausible mechanism of Rh catalyzed remote bromination .

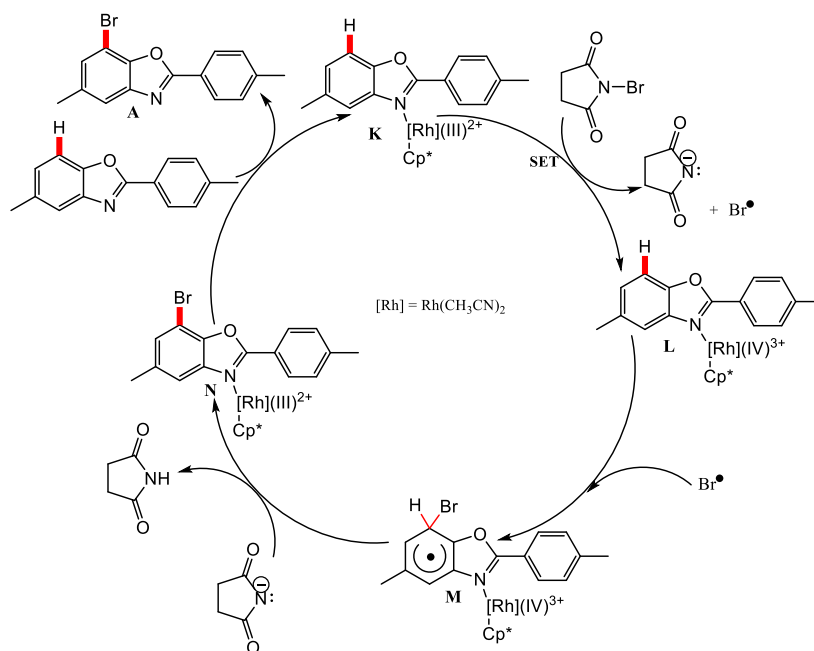

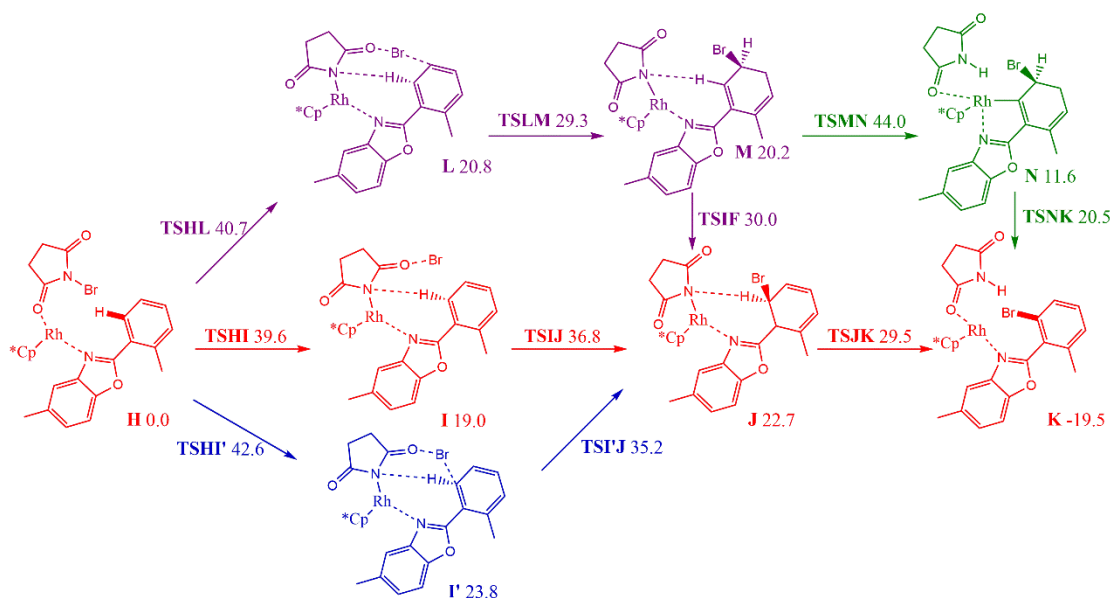

**Figure S2.** Free-energy reaction profiles (kcal mol<sup>-1</sup>) of four pathways for the ortho-bromination reaction, calculated at the SMD (dichloroethane) B3LYP/6-31G(d)/LanI2DZ level. Path1 in red, Path2 in blue, Path3 in purple and Path4 in green.

Electrophilic-aromatic-substitution-like (SEAr-like) reaction mechanism was examined theoretically as well, and four pathways (Path1-4) were located (**Figure S2**). The reaction of an electrophilic Br with an electron-rich, nucleophilic aromatic ring is involved in the C-H bond cleavage. And the rate-determining steps are activation of Br atom except Path4. Br adds to  $\alpha$ -carbon of aromatic ring attached to benzo[*d*]oxazole via different intermediates (**I** and **I'**) in Path1 and Path2. However, in Path3 and Path4,  $\beta$ -carbon of the aromatic ring is the attacked site of Br atom, the sequence of 1,2-Br shift and proton elimination differentiate the two pathways. The most preferred pathway out of the four paths is Path1 shown in **Figure S3**. The total barrier height is 39.6 kcal/mol, which makes this way far less favorable than the substitution mechanism.

In Path1, firstly NBS and benzo[*d*]oxazole coordinate with Rh(III) cation to form complex **H** with one O atom of NBS and N atom of benzo[*d*]oxazole. Transformation from **H** to **I** makes the Br atom more positive charged (from 0.283 e in **H** to 0.309 e in **I** out of NBO analysis). Then partially positive charged Br' s electrophilic attack to  $\alpha$ -carbon of aromatic



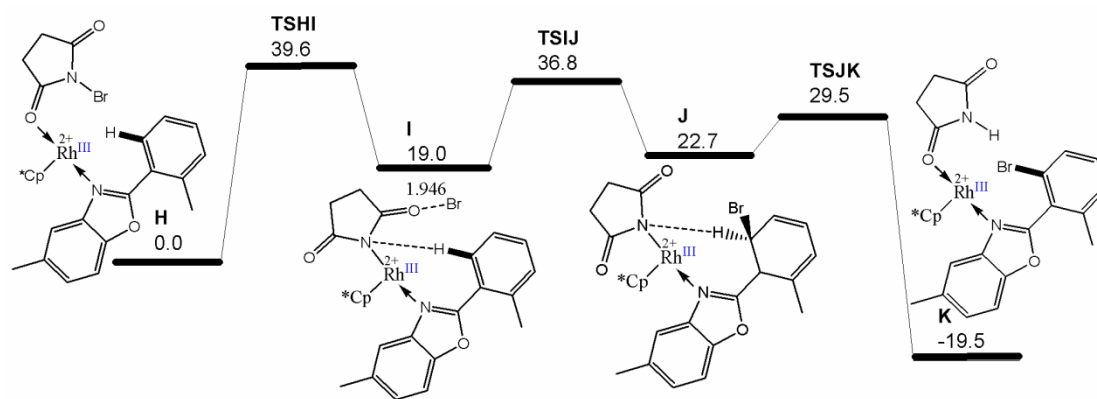

**Figure S3.** Free-energy reaction profile (kcal mol<sup>-1</sup>) for the ortho-halogenation reaction (Path1), calculated at the SMD (dichloroethane) B3LYP/6-31G(d)/Lanl2DZ level.

ring attached to benzo[*d*]oxazole gives intermediate **J**. Finally, elimination of  $\alpha$ -proton of the aromatic ring assisted by 2,5-dioxo-pyrrolidine anion results in the Rh(III) cation complex **K** coordinated with 2,5-dioxo-pyrrolidine and the product via **TSJK**. The optimized structures of **TSHI**, **TSIJ** and **TSJK** are shown in **Figure S4**. The electrophilic attack and the elimination of proton of the last two steps of this pathway is similar with  $S_EAr$  reaction. In this pathway, the activation of Br atom in the first step is the rate-determining step with the barrier of 39.6 kcal/mol. Path2 is very similar with Path1 with a shared intermediate **F**, the difference is that **H** via a higher barrier **TSHI'** (the relative free energy is 42.6 kcal/mol) transformed to a less stable intermediate **I'** (23.8 kcal/mol), which is converted to **J** via **TSI' J** (35.2 kcal/mol). The total barrier is higher than that of the preferred Path1 by 3 kcal/mol. Path3 also has the same intermediate **J**, while it is formed from electrophilic 1,2-Br shift of another intermediate **M** in which Br is added to  $\beta$ -carbon of the aromatic ring attached to benzo[*d*]oxazole. In this pathway, **M** is obtained through a two-step process via **TSHL** (40.7 kcal/mol) and **TSLM** (29.3 kcal/mol). Thus, the total barrier of Path3 is 40.7, higher than that of Path1, so Path3 is disfavored as well. The sequence of 1,2-Br shift and proton elimination differentiate Path3 and Path4. In Path3, proton elimination follows 1,2-Br shift, while conversely in Path4, 1,2-Br shift follows proton elimination. The rate-determining step in Path4 is the proton-elimination step, and the total barrier is 45.2 kcal/mol.

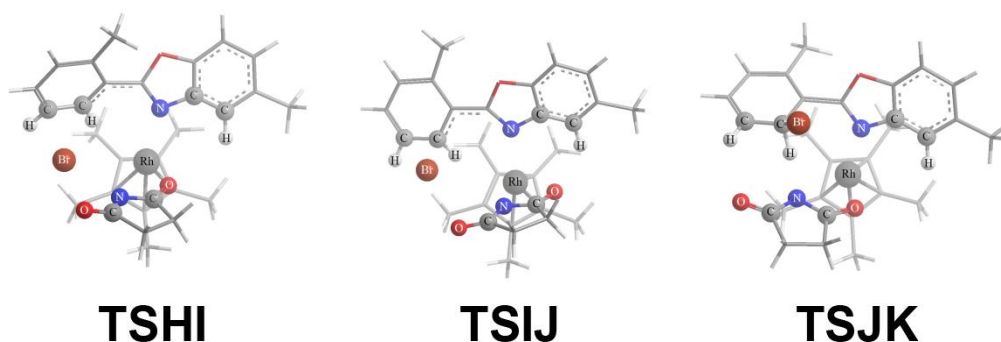

**Figure S4.** The optimized structures of **TSHI**, **TSIJ** and **TSJK** at the SMD (dichloroethane) B3LYP/6-31G(d)/Lan12DZ level

**Table S3.** Coordinate data sets and free energies for DFT optimized complexes at the SMD (Dimethylsulfoxide) B3LYP/6-31G(d) /Lan12DZ level.

|          |                     |  |    |             |             |             |
|----------|---------------------|--|----|-------------|-------------|-------------|
|          |                     |  | C  | -1.93988600 | 2.04997600  | -4.01529600 |
| <b>A</b> | <b>-1581.071852</b> |  | C  | -2.53975300 | 2.62600100  | -2.89464900 |
|          |                     |  | C  | -2.42196400 | 1.90668300  | -1.71706700 |
|          |                     |  | H  | 1.72396200  | -2.33375400 | 2.53861900  |
|          |                     |  | H  | 1.39905100  | -4.02547600 | 2.94047700  |
|          |                     |  | H  | 0.56776300  | -2.73382000 | 3.82495400  |
|          |                     |  | H  | 2.02100900  | -2.29163700 | 0.11355800  |
|          |                     |  | H  | 1.98338700  | -4.05521500 | 0.00538000  |
|          |                     |  | H  | 1.38009700  | -3.07795900 | -1.34353700 |
|          |                     |  | H  | -1.75077900 | -4.48477300 | -1.91503300 |
|          |                     |  | H  | -2.28588200 | -2.80994600 | -2.04793100 |
|          |                     |  | H  | -0.58518200 | -3.22357600 | -2.34317900 |
|          |                     |  | H  | -3.89710100 | -4.45029300 | 0.48094900  |
|          |                     |  | H  | -4.26486400 | -2.94882000 | 1.34818500  |
|          |                     |  | H  | -3.98261400 | -2.92003600 | -0.40535900 |
|          |                     |  | H  | -2.41413500 | -4.58542600 | 3.45573100  |
|          |                     |  | H  | -1.60073000 | -3.22369300 | 4.23214900  |
|          |                     |  | H  | -3.18699800 | -2.99621700 | 3.46584800  |
|          |                     |  | H  | -1.78508100 | -1.00862600 | 4.22874200  |
|          |                     |  | H  | -2.92164400 | 0.69531600  | 5.59439400  |
|          |                     |  | H  | -3.96753500 | 2.67169200  | 4.54069800  |
|          |                     |  | H  | -3.28675000 | 4.00875500  | 1.44374000  |
|          |                     |  | H  | -4.78637600 | 3.12335900  | 1.18407300  |
|          |                     |  | H  | -4.51560700 | 3.96713400  | 2.71918000  |
|          |                     |  | H  | -0.62267600 | -0.82372400 | -2.69041600 |
|          |                     |  | H  | -2.00022500 | 2.57218900  | -4.96634100 |
|          |                     |  | H  | -3.05995100 | 3.57666300  | -2.94076700 |
|          |                     |  | Rh | -1.22623900 | -1.29817300 | 1.02817300  |
|          |                     |  | C  | -2.51290400 | 1.22208100  | 0.34399000  |
|          |                     |  | C  | 0.93810200  | -3.03267800 | 2.84081300  |
|          |                     |  | C  | 1.43317800  | -3.14026200 | -0.25368900 |
|          |                     |  | C  | -1.45616700 | -3.44408600 | -1.72135500 |
|          |                     |  | C  | -3.66840600 | -3.37609900 | 0.53775500  |
|          |                     |  | C  | -2.22389600 | -3.50577400 | 3.37989400  |
|          |                     |  | Br | 2.03742200  | 2.43059400  | 3.20744800  |
|          |                     |  | C  | -2.16451000 | -0.01515500 | 2.34760800  |
|          |                     |  | C  | -2.22988200 | -0.15181400 | 3.73452700  |
|          |                     |  | C  | -2.87395300 | 0.81801400  | 4.51492600  |
|          |                     |  | C  | -3.46146400 | 1.93487600  | 3.92264000  |
|          |                     |  | C  | -3.40432600 | 2.13830700  | 2.53739400  |
|          |                     |  | C  | -2.74077300 | 1.15215300  | 1.77123400  |
|          |                     |  | C  | -4.03140500 | 3.37394000  | 1.93792900  |
|          |                     |  | O  | -2.89831300 | 2.23469400  | -0.45944600 |
|          |                     |  | N  | -1.84537600 | 0.27526600  | -0.28959900 |
|          |                     |  | C  | -1.75634200 | 0.68108100  | -1.62138400 |
|          |                     |  | C  | -1.15417800 | 0.11990400  | -2.75041800 |
|          |                     |  | C  | -1.25109900 | 0.81514600  | -3.96123000 |

|   |             |             |             |
|---|-------------|-------------|-------------|
| N | 3.57900200  | 1.62809400  | 2.39539800  |
| C | 4.88010700  | 2.11196800  | 2.63539100  |
| C | 5.81038500  | 1.22864600  | 1.81994100  |
| C | 4.90909200  | 0.19874300  | 1.11628700  |
| C | 3.48653800  | 0.53065800  | 1.53624400  |
| O | 5.15282400  | 3.04464500  | 3.35236400  |
| O | 2.45750200  | -0.02576400 | 1.21210000  |
| H | 6.36137200  | 1.86490100  | 1.12077100  |
| H | 6.53752200  | 0.77318700  | 2.49866100  |
| H | 4.96730100  | 0.24945200  | 0.02496000  |
| H | 5.12233500  | -0.83282900 | 1.41302900  |
| C | -0.63013800 | 0.25509400  | -5.21991500 |
| H | -1.39671300 | 0.02915600  | -5.97194600 |
| H | 0.06316900  | 0.97265200  | -5.67527800 |
| H | -0.07686000 | -0.66727200 | -5.01748200 |

**B -1581.063686**

|    |             |             |             |
|----|-------------|-------------|-------------|
| C  | -4.16928300 | 0.84830900  | 0.15890800  |
| C  | -2.79307900 | 0.66187700  | 0.17492300  |
| C  | -1.94303900 | 1.78215600  | 0.34292500  |
| C  | -2.45014700 | 3.09553500  | 0.48788100  |
| C  | -3.83865800 | 3.24501800  | 0.47120300  |
| C  | -4.68017000 | 2.14437900  | 0.31169700  |
| Rh | -1.81748500 | -1.16672100 | 0.09584000  |
| C  | -0.55710900 | 1.41826000  | 0.31790400  |
| C  | -2.03635100 | -1.28103400 | 2.37313900  |
| C  | -0.74202700 | -1.97294500 | 2.28228400  |
| C  | -0.91252600 | -3.23958300 | 1.64108300  |
| C  | -2.28423300 | -3.38538100 | 1.37040700  |
| C  | -3.00223600 | -2.16171000 | 1.84238600  |
| C  | -2.26951900 | -0.09327200 | 3.25526200  |
| C  | 0.48815500  | -1.50647700 | 2.95418200  |
| C  | 0.15100800  | -4.27126400 | 1.44241200  |
| C  | -2.92487300 | -4.61515500 | 0.84958900  |
| C  | -4.47342100 | -2.10221100 | 2.07258700  |
| C  | -1.55356500 | 4.29831300  | 0.64742800  |
| O  | 0.49421300  | 2.24841400  | 0.23913600  |
| N  | -0.21112300 | 0.14500600  | 0.28018000  |
| Br | -3.82101900 | -2.10692800 | -1.34283900 |
| N  | -0.95194400 | -1.35018600 | -1.79107200 |
| C  | -0.47497200 | -2.56971100 | -2.22602000 |
| C  | 0.02493000  | -2.43157300 | -3.66154400 |
| C  | -0.25182800 | -0.96868800 | -4.02436700 |
| C  | -0.84526900 | -0.36090800 | -2.75335600 |

|   |             |             |             |
|---|-------------|-------------|-------------|
| O | -0.44772800 | -3.59627900 | -1.55709200 |
| O | -1.16509400 | 0.81009500  | -2.61182600 |
| C | 2.07875700  | -0.94159300 | -0.12101500 |
| C | 3.42693300  | -0.60644800 | -0.29044100 |
| C | 3.82894300  | 0.75029000  | -0.25879000 |
| C | 2.92704900  | 1.79872600  | -0.07661300 |
| C | 1.60170500  | 1.42790000  | 0.07820600  |
| C | 1.16986900  | 0.09960300  | 0.07577200  |
| H | -4.85260600 | 0.02210400  | 0.02355900  |
| H | -4.26331600 | 4.23848500  | 0.58266300  |
| H | -5.75746700 | 2.28830400  | 0.30157900  |
| H | -2.26197600 | -0.42102700 | 4.30372200  |
| H | -1.48132200 | 0.65578500  | 3.13863400  |
| H | -3.23149200 | 0.38101900  | 3.05554900  |
| H | 1.39760300  | -1.90549600 | 2.50245800  |
| H | 0.44151300  | -1.88633400 | 3.98926600  |
| H | 0.54130000  | -0.41819800 | 3.02002100  |
| H | 1.12954400  | -3.81467300 | 1.27027800  |
| H | 0.23388000  | -4.89529000 | 2.34307800  |
| H | -0.08092100 | -4.91812400 | 0.59585000  |
| H | -3.96762000 | -4.46104600 | 0.57432000  |
| H | -2.37187100 | -5.00021100 | -0.01337800 |
| H | -2.88273900 | -5.38748500 | 1.63337400  |
| H | -4.69436500 | -2.68587300 | 2.97875600  |
| H | -4.81965500 | -1.08126400 | 2.24367100  |
| H | -5.03956200 | -2.54077100 | 1.24861600  |
| H | -0.86097700 | 4.18478000  | 1.48915000  |
| H | -0.94579000 | 4.46660100  | -0.24945700 |
| H | -2.15543000 | 5.19508800  | 0.82032300  |
| H | 1.08760000  | -2.69341700 | -3.69368500 |
| H | -0.50891400 | -3.14966000 | -4.29224500 |
| H | 0.64387400  | -0.40704500 | -4.30683800 |
| H | -0.98000700 | -0.85559300 | -4.83442000 |
| H | 1.74812300  | -1.97428600 | -0.15854800 |
| H | 4.88146500  | 0.98401600  | -0.39340100 |
| H | 3.23902700  | 2.83735700  | -0.06838400 |
| C | 4.46327000  | -1.68351500 | -0.50861100 |
| H | 5.02992800  | -1.50678100 | -1.43074200 |
| H | 5.18962600  | -1.70509100 | 0.31359700  |
| H | 4.00326500  | -2.67373700 | -0.57926800 |

**C -1581.08888**

|   |             |            |             |
|---|-------------|------------|-------------|
| C | -3.63951200 | 2.30495000 | -0.33274800 |
| C | -2.32064400 | 1.89420600 | -0.47508500 |

|    |             |             |             |
|----|-------------|-------------|-------------|
| C  | -1.24861100 | 2.52312400  | 0.18255800  |
| C  | -1.54917700 | 3.61139800  | 1.05270400  |
| C  | -2.88278000 | 4.01315900  | 1.19231500  |
| C  | -3.91665800 | 3.38259100  | 0.50666600  |
| Rh | -0.00145100 | -1.05411800 | 0.32636400  |
| C  | 0.16239500  | 2.13001900  | 0.00654400  |
| C  | -0.32259500 | -0.79112200 | 2.52066900  |
| C  | 0.75327800  | -1.72301500 | 2.25303800  |
| C  | 0.18639500  | -2.90617000 | 1.61816400  |
| C  | -1.19161100 | -2.65044700 | 1.38310100  |
| C  | -1.50744500 | -1.33875100 | 1.95778000  |
| C  | -0.20451600 | 0.47682300  | 3.30364700  |
| C  | 2.15207700  | -1.60768700 | 2.75460900  |
| C  | 0.94141700  | -4.17509300 | 1.40776200  |
| C  | -2.20402900 | -3.59267800 | 0.82232000  |
| C  | -2.87738800 | -0.75550100 | 2.03846000  |
| C  | -0.49944300 | 4.34689500  | 1.85733000  |
| O  | 1.02858900  | 3.16033600  | -0.18078100 |
| N  | 0.76425700  | 0.96421400  | 0.07480400  |
| Br | -2.02514100 | 0.36258400  | -1.67460600 |
| N  | 0.69022800  | -1.69018500 | -1.59233600 |
| C  | 0.53683100  | -2.99948200 | -2.02848700 |
| C  | 1.05021900  | -3.16468900 | -3.45681500 |
| C  | 1.54028500  | -1.77289000 | -3.84085300 |
| C  | 1.20726100  | -0.90494400 | -2.62626100 |
| O  | 0.04073500  | -3.91433300 | -1.38113800 |
| O  | 1.37316300  | 0.30482500  | -2.60058100 |
| C  | 3.26035800  | 0.39835900  | -0.01297800 |
| C  | 4.51746300  | 0.99251800  | -0.14514800 |
| C  | 4.62344500  | 2.39721600  | -0.30218200 |
| C  | 3.51126300  | 3.23511200  | -0.33393500 |
| C  | 2.28374900  | 2.60266000  | -0.19331200 |
| C  | 2.13623300  | 1.22851500  | -0.03675900 |
| H  | -4.43584200 | 1.79898900  | -0.86606500 |
| H  | -3.10775200 | 4.83921800  | 1.86037200  |
| H  | -4.94190900 | 3.71904900  | 0.62813100  |
| H  | -0.40516100 | 0.26533600  | 4.36261900  |
| H  | 0.80186800  | 0.89690000  | 3.23836400  |
| H  | -0.92515100 | 1.22911500  | 2.97472900  |
| H  | 2.85217000  | -2.17846600 | 2.14003300  |
| H  | 2.19285100  | -2.01908900 | 3.77393000  |
| H  | 2.48530300  | -0.56854900 | 2.80429400  |
| H  | 1.91975900  | -3.99318800 | 0.95349900  |
| H  | 1.11812400  | -4.63204700 | 2.39208100  |

|   |             |             |             |
|---|-------------|-------------|-------------|
| H | 0.39478800  | -4.87756400 | 0.78284900  |
| H | -2.98797200 | -3.05803400 | 0.27791700  |
| H | -1.74166700 | -4.31245300 | 0.14754300  |
| H | -2.68793400 | -4.13473300 | 1.64706700  |
| H | -3.40635200 | -1.22369100 | 2.88110800  |
| H | -2.85348500 | 0.32091800  | 2.21910300  |
| H | -3.46391600 | -0.95721700 | 1.13852400  |
| H | 0.24993200  | 3.67489400  | 2.28655000  |
| H | 0.03308900  | 5.08225200  | 1.24452600  |
| H | -0.97999400 | 4.88488800  | 2.67959100  |
| H | 1.83152000  | -3.93193900 | -3.46797000 |
| H | 0.23018200  | -3.52831200 | -4.08510400 |
| H | 2.62023100  | -1.72406900 | -4.01801600 |
| H | 1.04744000  | -1.35479700 | -4.72412100 |
| H | 3.15975300  | -0.67670800 | 0.08683700  |
| H | 5.61254300  | 2.83564600  | -0.40449900 |
| H | 3.59709300  | 4.30904700  | -0.45869000 |
| C | 5.77140500  | 0.14915100  | -0.13330200 |
| H | 6.32085900  | 0.24437200  | -1.07815400 |
| H | 6.45398000  | 0.46012600  | 0.66731500  |
| H | 5.53805500  | -0.90987400 | 0.01480000  |

### TSAB -1581.017152

|    |             |             |             |
|----|-------------|-------------|-------------|
| C  | -4.00576200 | 0.97596800  | 0.65298800  |
| C  | -2.64516300 | 0.71861800  | 0.50943700  |
| C  | -1.75112900 | 1.80996000  | 0.36060400  |
| C  | -2.19627300 | 3.15499700  | 0.36204800  |
| C  | -3.56915100 | 3.36692600  | 0.51086900  |
| C  | -4.46062000 | 2.29899000  | 0.64585900  |
| Rh | -1.80163600 | -1.15567700 | 0.52075200  |
| C  | -0.39558600 | 1.37053700  | 0.16308800  |
| C  | -2.38713800 | -1.43864200 | 2.64956200  |
| C  | -0.99449800 | -1.82619000 | 2.48412400  |
| C  | -0.94266900 | -3.08597300 | 1.76305100  |
| C  | -2.26557200 | -3.41082500 | 1.40070600  |
| C  | -3.17165800 | -2.39044700 | 1.92955700  |
| C  | -2.88228800 | -0.38396500 | 3.58887400  |
| C  | 0.15934800  | -1.17736100 | 3.17379000  |
| C  | 0.26371000  | -3.94934400 | 1.56774000  |
| C  | -2.69616700 | -4.65614200 | 0.70107700  |
| C  | -4.66054900 | -2.48349100 | 1.89812800  |
| C  | -1.25833400 | 4.32718200  | 0.20705800  |
| O  | 0.67708100  | 2.15968400  | -0.04808200 |
| N  | -0.10751200 | 0.08164900  | 0.13931400  |

|    |             |             |             |
|----|-------------|-------------|-------------|
| Br | -3.70758600 | -1.88171500 | -1.61053200 |
| N  | -1.50782600 | -1.46456000 | -1.91307600 |
| C  | -0.66080300 | -2.53634600 | -2.22574600 |
| C  | 0.24364000  | -2.11325400 | -3.37680900 |
| C  | -0.10673100 | -0.64425700 | -3.64330700 |
| C  | -1.32887500 | -0.36069700 | -2.77487300 |
| O  | -0.64980000 | -3.60946300 | -1.65518100 |
| O  | -2.01999600 | 0.63294900  | -2.80256600 |
| C  | 2.12533200  | -1.10264200 | -0.28086800 |
| C  | 3.47403900  | -0.83265100 | -0.54194300 |
| C  | 3.92177700  | 0.50622200  | -0.63921700 |
| C  | 3.06624000  | 1.59845400  | -0.48821600 |
| C  | 1.74087400  | 1.29108800  | -0.22815500 |
| C  | 1.26051400  | -0.01744500 | -0.11657300 |
| H  | -4.72046700 | 0.16653500  | 0.75870700  |
| H  | -3.94619400 | 4.38575700  | 0.51577800  |
| H  | -5.52432500 | 2.49938900  | 0.74852800  |
| H  | -2.98212700 | -0.82157200 | 4.59183100  |
| H  | -2.18642300 | 0.45536700  | 3.66293000  |
| H  | -3.85883600 | 0.00412700  | 3.29403400  |
| H  | 1.09836400  | -1.34142400 | 2.64026300  |
| H  | 0.26260800  | -1.62043300 | 4.17479900  |
| H  | 0.00609400  | -0.10325800 | 3.30315900  |
| H  | 1.19250400  | -3.37991600 | 1.65120100  |
| H  | 0.28815000  | -4.72612200 | 2.34535500  |
| H  | 0.24520300  | -4.45034100 | 0.59723500  |
| H  | -3.72122200 | -4.58562800 | 0.33234200  |
| H  | -2.03271500 | -4.88749700 | -0.13455000 |
| H  | -2.65416900 | -5.49412900 | 1.41179600  |
| H  | -4.99100800 | -3.35873500 | 2.47374900  |
| H  | -5.13145800 | -1.59879700 | 2.33151100  |
| H  | -5.04014300 | -2.61553400 | 0.87704800  |
| H  | -0.48183500 | 4.33247100  | 0.98066800  |
| H  | -0.74489800 | 4.30876500  | -0.76139200 |
| H  | -1.81374900 | 5.26696800  | 0.27724000  |
| H  | 1.28734300  | -2.28083300 | -3.09870300 |
| H  | 0.01868700  | -2.76267800 | -4.23027300 |
| H  | 0.69338300  | 0.04142700  | -3.34641400 |
| H  | -0.35982000 | -0.42743400 | -4.68492100 |
| H  | 1.76396800  | -2.12312200 | -0.21770700 |
| H  | 4.97278800  | 0.69015000  | -0.84467900 |
| H  | 3.41438200  | 2.62224600  | -0.57228800 |
| C  | 4.46061700  | -1.96341200 | -0.71869700 |
| H  | 4.97631800  | -1.89432700 | -1.68406700 |

|   |            |             |             |
|---|------------|-------------|-------------|
| H | 5.23373200 | -1.93809600 | 0.05955600  |
| H | 3.96486600 | -2.93761500 | -0.66767200 |

**TSBC -1581.03122**

|    |             |             |             |
|----|-------------|-------------|-------------|
| C  | -4.26172600 | 1.05776400  | 0.76042900  |
| C  | -2.97079800 | 0.85593300  | 0.30097800  |
| C  | -2.00025800 | 1.87466200  | 0.29779200  |
| C  | -2.37460200 | 3.17899000  | 0.74222300  |
| C  | -3.67891400 | 3.37146700  | 1.20016300  |
| C  | -4.59936300 | 2.32564500  | 1.23950200  |
| Rh | -1.62933700 | -1.30342000 | 0.20578200  |
| C  | -0.63274600 | 1.49505000  | 0.03774700  |
| C  | -2.25239100 | -1.38871500 | 2.42027000  |
| C  | -0.92110400 | -1.90790700 | 2.25254000  |
| C  | -0.99562000 | -3.12216500 | 1.46977000  |
| C  | -2.37477000 | -3.32397100 | 1.10209900  |
| C  | -3.14316700 | -2.27119800 | 1.71170600  |
| C  | -2.61890700 | -0.29200700 | 3.36557000  |
| C  | 0.29148900  | -1.40181400 | 2.95841700  |
| C  | 0.14321600  | -4.07137200 | 1.30556300  |
| C  | -2.99990600 | -4.52726600 | 0.47181000  |
| C  | -4.63290500 | -2.24905800 | 1.73653400  |
| C  | -1.40844700 | 4.33958600  | 0.77336000  |
| O  | 0.34639000  | 2.38166600  | -0.22000800 |
| N  | -0.20284200 | 0.25558700  | 0.11500400  |
| Br | -3.49757000 | -0.58183500 | -1.62182200 |
| N  | -0.67605700 | -1.87347700 | -1.64976800 |
| C  | -0.55326500 | -3.17547300 | -2.10059000 |
| C  | 0.04204500  | -3.20200600 | -3.50614200 |
| C  | 0.22022800  | -1.73163000 | -3.86870900 |
| C  | -0.31776200 | -0.97276300 | -2.65673200 |
| O  | -0.87367500 | -4.18504500 | -1.48689600 |
| O  | -0.41229700 | 0.24425800  | -2.61512400 |
| C  | 2.16190300  | -0.69117300 | -0.18356400 |
| C  | 3.47492400  | -0.28467100 | -0.44187300 |
| C  | 3.76807200  | 1.08734700  | -0.63424400 |
| C  | 2.78973400  | 2.07888100  | -0.57905600 |
| C  | 1.50256200  | 1.63400900  | -0.32371300 |
| C  | 1.17151300  | 0.29346600  | -0.12280000 |
| H  | -5.01895200 | 0.28931800  | 0.70262800  |
| H  | -3.97384400 | 4.35971400  | 1.53947700  |
| H  | -5.61071100 | 2.49744000  | 1.59732600  |
| H  | -2.54909800 | -0.67496100 | 4.39298900  |
| H  | -1.93266900 | 0.55597900  | 3.28516400  |

|   |             |             |             |
|---|-------------|-------------|-------------|
| H | -3.63676700 | 0.06575900  | 3.21009100  |
| H | 1.21187000  | -1.65551000 | 2.42958200  |
| H | 0.33375500  | -1.87487900 | 3.95014100  |
| H | 0.25199900  | -0.32054600 | 3.10992200  |
| H | 1.06465100  | -3.55324700 | 1.02297200  |
| H | 0.32919600  | -4.55146800 | 2.27723500  |
| H | -0.06883700 | -4.83463200 | 0.56109400  |
| H | -3.63542300 | -4.25203900 | -0.37555100 |
| H | -2.25327300 | -5.23402100 | 0.11866000  |
| H | -3.64099200 | -5.02048600 | 1.21519400  |
| H | -4.97223300 | -3.07861000 | 2.37338400  |
| H | -5.03032600 | -1.32528000 | 2.15519600  |
| H | -5.06173500 | -2.41588500 | 0.74414000  |
| H | -0.55901600 | 4.14912100  | 1.43908800  |
| H | -0.99898700 | 4.55632500  | -0.21806000 |
| H | -1.92492500 | 5.23373300  | 1.13266000  |
| H | 0.97792900  | -3.76980800 | -3.48273400 |
| H | -0.64754300 | -3.73676400 | -4.16727900 |
| H | 1.26459600  | -1.44198800 | -4.02675600 |
| H | -0.34250000 | -1.42265100 | -4.75512700 |
| H | 1.92255900  | -1.73967300 | -0.04643300 |
| H | 4.79582400  | 1.37764600  | -0.83500300 |
| H | 3.01764400  | 3.12816200  | -0.73218600 |
| C | 4.59025800  | -1.30116700 | -0.51635200 |
| H | 5.13160900  | -1.22652600 | -1.46710900 |
| H | 5.32472500  | -1.14409100 | 0.28371000  |
| H | 4.20642000  | -2.32187600 | -0.42443300 |

**TSAC -1581.039301**

|    |             |             |             |
|----|-------------|-------------|-------------|
| C  | -1.33674000 | -2.97107700 | 2.49002200  |
| C  | -0.03429900 | -3.07419300 | 1.91997700  |
| C  | -0.17338900 | -3.11079700 | 0.46645700  |
| C  | -1.57768900 | -3.04370500 | 0.15537000  |
| C  | -2.30167500 | -2.92132100 | 1.39869100  |
| Rh | -0.98080000 | -1.19689900 | 1.19773000  |
| C  | -2.11215000 | 1.33899900  | 0.26918200  |
| C  | 1.26393300  | -3.17970400 | 2.64550200  |
| C  | 0.95885000  | -3.28499500 | -0.48504900 |
| C  | -2.18954200 | -3.13453800 | -1.20317100 |
| C  | -3.78377400 | -2.88927000 | 1.55270400  |
| C  | -1.67746800 | -2.99810800 | 3.94384000  |
| Br | 0.61332200  | 0.74645500  | 2.16097500  |
| C  | -1.52916900 | 0.73840600  | 2.56112000  |
| C  | -1.83698800 | 0.60118600  | 3.91722300  |

|   |             |             |             |
|---|-------------|-------------|-------------|
| C | -3.04137700 | 1.10928800  | 4.40571700  |
| C | -3.92006300 | 1.77447900  | 3.55034900  |
| C | -3.65429000 | 1.92759900  | 2.18023100  |
| C | -2.44374100 | 1.39445500  | 1.68905700  |
| C | -4.66168600 | 2.61949300  | 1.29395300  |
| O | -2.43936800 | 2.29305700  | -0.62350600 |
| N | -1.43453000 | 0.34127800  | -0.24921300 |
| C | -1.25648700 | 0.64442400  | -1.59914800 |
| C | -0.59344700 | -0.01003600 | -2.64048400 |
| C | -0.60861500 | 0.59139800  | -3.90222500 |
| C | -1.27938000 | 1.82546800  | -4.09053900 |
| C | -1.93708100 | 2.49352500  | -3.05875100 |
| C | -1.89881800 | 1.86594500  | -1.82346900 |
| H | 2.05360500  | -2.62534300 | 2.12818900  |
| H | 1.56036200  | -4.23772100 | 2.68301500  |
| H | 1.18516100  | -2.81578900 | 3.67261800  |
| H | 1.79532600  | -2.62755400 | -0.22345300 |
| H | 1.31954300  | -4.32195600 | -0.42507200 |
| H | 0.65616800  | -3.09417200 | -1.51719300 |
| H | -2.42070500 | -4.18710800 | -1.41702600 |
| H | -3.12325900 | -2.57001200 | -1.26504500 |
| H | -1.51052800 | -2.77618100 | -1.97913800 |
| H | -4.15132600 | -3.91792400 | 1.67790900  |
| H | -4.08777400 | -2.32085700 | 2.43549100  |
| H | -4.27409000 | -2.46625700 | 0.67239600  |
| H | -1.89472800 | -4.03532900 | 4.23458700  |
| H | -0.84911200 | -2.64634400 | 4.56299400  |
| H | -2.56397700 | -2.40062700 | 4.16795600  |
| H | -1.13111400 | 0.13133300  | 4.59426500  |
| H | -3.28573300 | 1.00641500  | 5.45902600  |
| H | -4.84580000 | 2.18144600  | 3.94677600  |
| H | -4.27045300 | 3.56821500  | 0.90991400  |
| H | -4.93323200 | 2.00605400  | 0.42746800  |
| H | -5.57431800 | 2.83425400  | 1.85653700  |
| H | -0.07461600 | -0.94805700 | -2.47217800 |
| H | -1.27500600 | 2.27259600  | -5.08091800 |
| H | -2.43958600 | 3.44255000  | -3.21022600 |
| N | 2.99358700  | 0.80854900  | 1.71005000  |
| C | 3.75059800  | -0.15863200 | 1.11916500  |
| C | 5.19763000  | 0.33234000  | 0.94902500  |
| C | 5.18220000  | 1.74249000  | 1.54661200  |
| C | 3.72183400  | 1.94252200  | 1.98564700  |
| O | 3.36583100  | -1.27679600 | 0.76197100  |
| O | 3.28406700  | 2.96359200  | 2.50504500  |

|   |             |             |             |
|---|-------------|-------------|-------------|
| H | 5.87379100  | -0.35865600 | 1.46386300  |
| H | 5.45883400  | 0.30942200  | -0.11465500 |
| H | 5.83631000  | 1.85604600  | 2.41786100  |
| H | 5.45408100  | 2.52759500  | 0.83309400  |
| C | 0.08248000  | -0.06510500 | -5.07421700 |
| H | -0.63531500 | -0.31916100 | -5.86426600 |
| H | 0.82722100  | 0.60440400  | -5.52111400 |
| H | 0.59312500  | -0.98467400 | -4.77291800 |

**D-*o*Me -1473.830875**

|    |             |             |             |
|----|-------------|-------------|-------------|
| Rh | 0.74104900  | -0.83036000 | 0.00688800  |
| N  | 1.43158200  | 0.20890300  | 1.78719600  |
| N  | -0.80918400 | -1.55090600 | 1.32564200  |
| C  | 1.77240500  | 0.71930900  | 2.76763000  |
| C  | 0.69262400  | 4.99185800  | -0.66787300 |
| C  | 1.75939600  | 4.06696500  | -0.56032600 |
| C  | 1.49120000  | 2.69898000  | -0.44758600 |
| C  | 0.15535200  | 2.28612200  | -0.44978800 |
| C  | 0.79141900  | -2.20861700 | -1.73591400 |
| C  | 1.61543600  | -1.06707400 | -2.05745800 |
| C  | 2.66979500  | -0.98831600 | -1.08834600 |
| C  | 2.53124100  | -2.12245000 | -0.18105800 |
| C  | 1.39236300  | -2.87825600 | -0.59476500 |
| C  | -0.30808400 | -2.77383800 | -2.57419100 |
| C  | 1.41658200  | -0.15181000 | -3.21768200 |
| C  | 3.83085000  | -0.04969400 | -1.09906700 |
| C  | 3.48851300  | -2.48416500 | 0.90574300  |
| C  | 0.92382000  | -4.16185300 | 0.00294700  |
| C  | -1.49987800 | -2.01590700 | 2.12856000  |
| C  | -2.37791300 | -2.59461700 | 3.13119000  |
| C  | 2.19915300  | 1.37172300  | 3.99411700  |
| C  | -0.86270800 | 3.23221500  | -0.54664800 |
| C  | -0.64315500 | 4.59729100  | -0.65984800 |
| N  | -0.45360200 | 1.02150500  | -0.35178600 |
| C  | -1.75161100 | 1.24528900  | -0.38985600 |
| O  | -2.06072200 | 2.56137500  | -0.50622800 |
| C  | -2.89113700 | 0.31763000  | -0.36256400 |
| C  | -2.93346800 | -0.71891900 | -1.30618800 |
| C  | -4.01405200 | -1.59719600 | -1.34772700 |
| C  | -5.05810600 | -1.44024400 | -0.43465100 |
| C  | -5.01925700 | -0.40439700 | 0.50130500  |
| C  | -3.95062400 | 0.49958500  | 0.55827400  |
| C  | 3.18364400  | 4.57131100  | -0.56966700 |
| H  | 0.92644400  | 6.04945300  | -0.75532100 |

|   |             |             |             |
|---|-------------|-------------|-------------|
| H | 2.29872700  | 1.98462000  | -0.35197300 |
| H | -0.72463300 | -2.03211200 | -3.25848900 |
| H | -1.11344900 | -3.19043100 | -1.96396800 |
| H | 0.10165500  | -3.59257600 | -3.18170100 |
| H | 1.91849700  | -0.58382100 | -4.09461200 |
| H | 1.84920200  | 0.83458000  | -3.03815200 |
| H | 0.35894800  | -0.03514000 | -3.46621600 |
| H | 4.08505300  | 0.29324900  | -0.09221500 |
| H | 3.65200100  | 0.81577800  | -1.73911900 |
| H | 4.70775300  | -0.58199800 | -1.49232700 |
| H | 2.99326400  | -3.01162300 | 1.72476200  |
| H | 3.99778500  | -1.60447700 | 1.30618900  |
| H | 4.25569900  | -3.15379100 | 0.49309500  |
| H | 1.45246000  | -4.98874400 | -0.49137700 |
| H | -0.14681800 | -4.31570300 | -0.14960500 |
| H | 1.14626700  | -4.21836300 | 1.07132900  |
| H | -2.13473800 | -3.65327800 | 3.26678600  |
| H | -3.41852700 | -2.50069100 | 2.80592600  |
| H | -2.24618100 | -2.06894600 | 4.08233000  |
| H | 2.21325800  | 0.64541400  | 4.81300700  |
| H | 1.50374900  | 2.18083300  | 4.23881100  |
| H | 3.20341100  | 1.78654800  | 3.86110900  |
| H | -1.45943600 | 5.30752400  | -0.73575300 |
| H | -2.12653800 | -0.81296000 | -2.02278300 |
| H | -4.04446500 | -2.38834600 | -2.09116000 |
| H | -5.83669400 | -0.28887800 | 1.20813200  |
| H | 3.89647400  | 3.76228900  | -0.38231100 |
| H | 3.33639000  | 5.34220400  | 0.19507400  |
| H | 3.43684500  | 5.02522400  | -1.53614400 |
| H | -5.90666100 | -2.11865000 | -0.45233500 |
| C | -3.96101400 | 1.60708400  | 1.58507600  |
| H | -2.98736100 | 1.72680200  | 2.07408700  |
| H | -4.21622600 | 2.57152100  | 1.13069100  |
| H | -4.70473700 | 1.39905400  | 2.35995700  |

**D-*p*Me -1473.836562**

|    |             |             |             |
|----|-------------|-------------|-------------|
| Rh | 0.49590400  | -1.02871900 | 0.02002000  |
| N  | 1.84412700  | -0.43429500 | 1.63352500  |
| N  | -0.92246800 | -1.12709300 | 1.65196300  |
| C  | 2.50863000  | -0.22657800 | 2.55719900  |
| C  | 2.69024000  | 4.34877800  | -0.45274700 |
| C  | 3.29113300  | 3.06753700  | -0.44943800 |
| C  | 2.49471300  | 1.92069100  | -0.36832600 |
| C  | 1.10621700  | 2.07868700  | -0.29428100 |





|   |             |             |             |
|---|-------------|-------------|-------------|
| C | -2.20552800 | 2.19344300  | -0.16103000 |
| C | -3.00435400 | 1.20385900  | -0.74941100 |
| C | -4.38694600 | 1.35749500  | -0.80560800 |
| C | -5.01267400 | 2.49411200  | -0.27265000 |
| C | -4.20301600 | 3.48074300  | 0.31708300  |
| C | -2.82140600 | 3.34414500  | 0.36949300  |
| C | -6.50905600 | 2.66590500  | -0.32969300 |
| H | 4.48565400  | 3.74882500  | -0.01714900 |
| H | 2.67621300  | -0.16540000 | -0.29502800 |
| H | -3.35213500 | -1.34464000 | -2.35980700 |
| H | -3.70448200 | -2.06579900 | -0.76936100 |
| H | -3.47772800 | -3.09907400 | -2.18290500 |
| H | -0.63265300 | -1.34955400 | -4.23648100 |
| H | 0.12663900  | -0.05847200 | -3.29783800 |
| H | -1.64231200 | -0.24036300 | -3.29434700 |
| H | 2.80426700  | -2.22914300 | -1.49928200 |
| H | 2.11787000  | -1.03487500 | -2.62373500 |
| H | 2.14708400  | -2.74929400 | -3.05553400 |
| H | 0.93945800  | -4.36306300 | 1.11694000  |
| H | 2.27736200  | -3.63564900 | 0.19286700  |
| H | 1.41055700  | -5.03698800 | -0.44923100 |
| H | -2.12937300 | -5.05848500 | -0.07460500 |
| H | -2.83952800 | -3.66190000 | 0.74649200  |
| H | -1.33766800 | -4.38950800 | 1.36101600  |
| H | -4.42533000 | -0.92262700 | 3.35108300  |
| H | -3.75510200 | 0.71750800  | 3.57000400  |
| H | -3.04757900 | -0.66213300 | 4.45682100  |
| H | 1.79432100  | -1.62843200 | 4.71511300  |
| H | 2.61165700  | -0.11983300 | 4.21896600  |
| H | 3.30523900  | -1.70173500 | 3.76666000  |
| H | 2.25767400  | 4.82958400  | 0.06040900  |
| H | -2.53124200 | 0.32619700  | -1.16957500 |
| H | -4.99149700 | 0.58667400  | -1.27632800 |
| H | -4.66600600 | 4.36995500  | 0.73739400  |
| H | -2.21905100 | 4.12230200  | 0.82606100  |
| H | -6.78045700 | 3.57061900  | -0.88803300 |
| H | -6.93233500 | 2.77550300  | 0.67669200  |
| H | -6.99402200 | 1.81177500  | -0.81202800 |
| C | 5.17533000  | 1.12435800  | -0.19543500 |
| C | 5.92099300  | 1.50895300  | 1.10447700  |
| H | 6.93951900  | 1.10269600  | 1.08797800  |
| H | 5.99894600  | 2.59428600  | 1.22816800  |
| H | 5.41044000  | 1.10598700  | 1.98765700  |
| C | 5.94464700  | 1.69364000  | -1.41075000 |

|   |            |             |             |
|---|------------|-------------|-------------|
| H | 6.95962300 | 1.27924400  | -1.44121600 |
| H | 5.44491500 | 1.43518200  | -2.35205300 |
| H | 6.03422200 | 2.78423600  | -1.36552800 |
| C | 5.17153400 | -0.41143200 | -0.30734100 |
| H | 4.66664600 | -0.88402900 | 0.54407400  |
| H | 4.68726800 | -0.75423400 | -1.22880600 |
| H | 6.20374000 | -0.77864600 | -0.32183800 |

#### D-Cl -1483.667369

|    |             |             |             |
|----|-------------|-------------|-------------|
| Rh | 0.14074500  | -1.15227000 | -0.01464200 |
| N  | 1.58845500  | -0.95383200 | 1.58354100  |
| N  | -1.27941100 | -1.00589600 | 1.65759000  |
| C  | 2.29064200  | -0.92831700 | 2.50241400  |
| C  | 3.39375000  | 3.74727000  | -0.19720100 |
| C  | 3.69226200  | 2.37580800  | -0.26872700 |
| C  | 2.71962300  | 1.37856700  | -0.26228900 |
| C  | 1.39309700  | 1.80919800  | -0.17998600 |
| C  | -1.07318700 | -2.51362600 | -1.31693400 |
| C  | -0.32382300 | -1.63514100 | -2.16038000 |
| C  | 1.08768600  | -1.83993000 | -1.88233300 |
| C  | 1.19576900  | -2.90705100 | -0.91561100 |
| C  | -0.13103700 | -3.28184900 | -0.51256300 |
| C  | -2.55040900 | -2.72252300 | -1.30856000 |
| C  | -0.85935700 | -0.71184200 | -3.20207600 |
| C  | 2.21084500  | -1.23682300 | -2.65985000 |
| C  | 2.46651300  | -3.52181200 | -0.43807300 |
| C  | -0.49923700 | -4.37591000 | 0.43548700  |
| C  | -1.94498700 | -1.00835800 | 2.60347300  |
| C  | -2.79278300 | -1.00081100 | 3.78347200  |
| C  | 3.18201400  | -0.88156100 | 3.64854000  |
| C  | 1.10840000  | 3.17408800  | -0.11412600 |
| C  | 2.06780000  | 4.17353500  | -0.11803600 |
| N  | 0.17380600  | 1.11596400  | -0.14595000 |
| C  | -0.76234300 | 2.04706300  | -0.08027700 |
| O  | -0.25310900 | 3.30866900  | -0.05284200 |
| C  | -2.21454100 | 1.95758000  | -0.05610700 |
| C  | -2.87826100 | 0.76657200  | -0.38537500 |
| C  | -4.26840700 | 0.71228200  | -0.38336000 |
| C  | -5.03864900 | 1.83759000  | -0.05298500 |
| C  | -4.36561700 | 3.02641000  | 0.27834200  |
| C  | -2.97855600 | 3.09550400  | 0.27457700  |
| C  | -6.54420600 | 1.78620000  | -0.06994700 |
| H  | 4.19700000  | 4.47575500  | -0.20521200 |
| H  | 2.98229700  | 0.33154400  | -0.31891400 |

|    |             |             |             |   |             |             |             |
|----|-------------|-------------|-------------|---|-------------|-------------|-------------|
| H  | -3.08645400 | -1.92205300 | -1.82125300 | C | 0.18377600  | -3.13163200 | -0.69010200 |
| H  | -2.93865000 | -2.82107900 | -0.29079800 | C | -1.52274500 | -2.19279000 | -2.44257400 |
| H  | -2.76944600 | -3.66238500 | -1.83402200 | C | 1.01780000  | -0.47120900 | -3.24345700 |
| H  | -0.78177300 | -1.20622700 | -4.18032600 | C | 3.50039700  | -1.52855000 | -1.48806100 |
| H  | -0.27742900 | 0.21249000  | -3.25625000 | C | 2.41928700  | -3.73186400 | 0.52335800  |
| H  | -1.90838800 | -0.46328500 | -3.03331500 | C | -0.70863400 | -4.13638500 | -0.04422200 |
| H  | 3.14893500  | -1.24433100 | -2.10072500 | C | -1.44408400 | -1.34422700 | 2.68112700  |
| H  | 1.98766500  | -0.21020400 | -2.95976800 | C | -2.23025500 | -1.50930300 | 3.89171700  |
| H  | 2.36226000  | -1.82543800 | -3.57548100 | C | 3.47857900  | 0.11971200  | 3.62936400  |
| H  | 2.35392500  | -3.98806500 | 0.54278900  | C | 0.42754700  | 3.33561900  | -0.31314100 |
| H  | 3.28572000  | -2.79971200 | -0.40296500 | C | 1.12162400  | 4.52762600  | -0.45167900 |
| H  | 2.75123500  | -4.30822600 | -1.15140500 | N | 0.00208900  | 1.12156400  | -0.18036300 |
| H  | -0.55618000 | -5.32675100 | -0.11162100 | C | -1.11974000 | 1.81262400  | -0.05082900 |
| H  | -1.47556800 | -4.19599200 | 0.89191400  | O | -0.91870900 | 3.15641700  | -0.11914000 |
| H  | 0.24274700  | -4.49089800 | 1.22982300  | C | -2.50265200 | 1.40542200  | 0.13592000  |
| H  | -3.72437500 | -1.53516000 | 3.57120800  | C | -2.95111700 | 0.10948200  | -0.18338300 |
| H  | -3.02414600 | 0.03232900  | 4.06138300  | C | -4.28068000 | -0.23912600 | -0.02558000 |
| H  | -2.27546700 | -1.49236000 | 4.61333900  | C | -5.20912400 | 0.69967400  | 0.46373900  |
| H  | 2.69619100  | -1.34606500 | 4.51246100  | C | -4.77708300 | 1.99816000  | 0.78351300  |
| H  | 3.42053200  | 0.16067200  | 3.88372800  | C | -3.44070600 | 2.34145000  | 0.61276900  |
| H  | 4.10613800  | -1.42198400 | 3.41963200  | C | 4.63891000  | 3.09070200  | -0.90965500 |
| H  | 1.80709500  | 5.22462500  | -0.06431200 | H | 3.09232500  | 5.30581000  | -0.76448200 |
| H  | -2.29444200 | -0.10737700 | -0.64045300 | H | 2.89543700  | 1.00747400  | -0.59570900 |
| H  | -4.76784700 | -0.21717500 | -0.64350700 | H | -1.77946500 | -1.20405100 | -2.82983900 |
| H  | -4.94074800 | 3.91042700  | 0.54135700  | H | -2.33952700 | -2.55147700 | -1.81245100 |
| H  | -2.48588700 | 4.02610300  | 0.53361600  | H | -1.44689300 | -2.87440500 | -3.30154400 |
| H  | -6.94253100 | 2.34471700  | -0.92740300 | H | 1.16435800  | -1.00929100 | -4.19025500 |
| H  | -6.96788600 | 2.24233400  | 0.83223700  | H | 1.84388500  | 0.23329500  | -3.12674300 |
| H  | -6.90991400 | 0.75746400  | -0.14255400 | H | 0.08452000  | 0.09163400  | -3.32397000 |
| Cl | 5.38454700  | 1.89092400  | -0.37040400 | H | 3.99960800  | -1.40853600 | -0.52323400 |

### D-*p*OMe -1549.5371102

|    |             |             |             |   |             |             |             |
|----|-------------|-------------|-------------|---|-------------|-------------|-------------|
| Rh | 0.53347700  | -1.04107200 | 0.03287600  | H | 3.62257600  | -0.61526800 | -2.07266400 |
| N  | 1.91665000  | -0.41629300 | 1.60858300  | H | 4.01607400  | -2.33872200 | -2.02219900 |
| N  | -0.82931200 | -1.20317200 | 1.71176700  | H | 1.85185300  | -4.05485200 | 1.39997500  |
| C  | 2.60660500  | -0.18067400 | 2.50661900  | H | 3.29100000  | -3.16446700 | 0.85827800  |
| C  | 2.49584800  | 4.40493700  | -0.64852000 | H | 2.78356400  | -4.63173800 | 0.00938400  |
| C  | 3.14310600  | 3.14822400  | -0.70243100 | H | -0.75020600 | -5.02925000 | -0.68338300 |
| C  | 2.40142500  | 1.97021800  | -0.55905200 | H | -1.72926300 | -3.76172300 | 0.06615300  |
| C  | 1.02047000  | 2.07566900  | -0.36027900 | H | -0.33358000 | -4.44309700 | 0.93453900  |
| C  | -0.21340500 | -2.19677700 | -1.72358900 | H | -2.94269400 | -2.32977100 | 3.75980800  |
| C  | 0.96668400  | -1.46497800 | -2.13244800 | H | -2.77820600 | -0.58500400 | 4.10131500  |
| C  | 2.06650800  | -1.90945000 | -1.33182500 | H | -1.56878400 | -1.73693700 | 4.73360100  |
| C  | 1.57565800  | -2.93837000 | -0.41971700 | H | 3.14934200  | -0.43833900 | 4.51165700  |
|    |             |             |             | H | 3.44257400  | 1.19218100  | 3.84574800  |
|    |             |             |             | H | 4.50676100  | -0.16471100 | 3.38420000  |

|   |             |             |             |
|---|-------------|-------------|-------------|
| H | 0.62428900  | 5.49064000  | -0.41081400 |
| H | -2.24847000 | -0.61578300 | -0.56816000 |
| H | -4.63240700 | -1.23362300 | -0.28260200 |
| H | -5.47184400 | 2.73935700  | 1.16042100  |
| H | -3.12293700 | 3.34805800  | 0.86135300  |
| H | 4.99651400  | 2.05769600  | -0.96006600 |
| H | 5.17180000  | 3.59143800  | -0.09156500 |
| H | 4.93201500  | 3.59638000  | -1.83781900 |
| C | -7.47758000 | 1.16091700  | 1.07926900  |
| H | -8.40762800 | 0.59040300  | 1.08900600  |
| H | -7.24187700 | 1.49347400  | 2.09662300  |
| H | -7.58839300 | 2.02950000  | 0.42069800  |
| O | -6.47906800 | 0.26083300  | 0.58614400  |

**E -1473.60006**

|    |             |             |             |
|----|-------------|-------------|-------------|
| Rh | 0.47898400  | -1.07062300 | 0.01843700  |
| N  | 1.84446500  | -0.45395600 | 1.60170100  |
| N  | -0.93430000 | -1.13994000 | 1.67659000  |
| C  | 2.52518500  | -0.25001500 | 2.51484300  |
| C  | 2.70512300  | 4.39644300  | -0.24780800 |
| C  | 3.29846300  | 3.08330200  | -0.36860400 |
| C  | 2.49953900  | 1.95312200  | -0.35695300 |
| C  | 1.10858800  | 2.13454400  | -0.23562700 |
| C  | -0.40031900 | -2.40416400 | -1.53099900 |
| C  | 0.60108200  | -1.59009800 | -2.17135100 |
| C  | 1.86668800  | -1.83918500 | -1.53161700 |
| C  | 1.65571400  | -2.85834200 | -0.51615500 |
| C  | 0.26120800  | -3.20022800 | -0.51187000 |
| C  | -1.81305600 | -2.58583600 | -1.97907100 |
| C  | 0.36252000  | -0.65501300 | -3.30629300 |
| C  | 3.19837300  | -1.31401300 | -1.95588700 |
| C  | 2.71766000  | -3.49212200 | 0.31438500  |
| C  | -0.38205700 | -4.25241400 | 0.32553800  |
| C  | -1.55372000 | -1.26181900 | 2.64621300  |
| C  | -2.33459900 | -1.40964500 | 3.86205300  |
| C  | 3.38604400  | 0.01769800  | 3.65360100  |
| C  | 0.57319100  | 3.45520900  | -0.13168800 |
| C  | 1.33647000  | 4.60755100  | -0.12897600 |
| N  | 0.06524800  | 1.25127300  | -0.20534900 |
| C  | -1.04694700 | 2.00253800  | -0.12068100 |
| O  | -0.77015600 | 3.34220100  | -0.05120300 |
| C  | -2.42488100 | 1.65289200  | -0.13366300 |
| C  | -2.84535400 | 0.32560600  | -0.41310500 |
| C  | -4.18935700 | 0.02255900  | -0.46065300 |

|   |             |             |             |
|---|-------------|-------------|-------------|
| C | -5.16933100 | 1.01541300  | -0.22713300 |
| C | -4.74476100 | 2.33970600  | 0.05123000  |
| C | -3.40792600 | 2.66261300  | 0.09221500  |
| C | 4.78883200  | 2.99157500  | -0.50876400 |
| C | -6.62626900 | 0.68940500  | -0.28043400 |
| H | 3.37062100  | 5.25463800  | -0.25579100 |
| H | 2.92569200  | 0.96323400  | -0.44625600 |
| H | -2.17962600 | -1.72691500 | -2.54495500 |
| H | -2.48762500 | -2.77862900 | -1.14109200 |
| H | -1.85566500 | -3.46125100 | -2.64177700 |
| H | 0.43662400  | -1.22092300 | -4.24562000 |
| H | 1.10536600  | 0.14476600  | -3.34273800 |
| H | -0.63638300 | -0.21389800 | -3.26561500 |
| H | 3.86149800  | -1.15366300 | -1.10182300 |
| H | 3.11019800  | -0.38477100 | -2.52172600 |
| H | 3.67717400  | -2.05726400 | -2.60800200 |
| H | 2.34139600  | -3.79877100 | 1.29324600  |
| H | 3.57680600  | -2.83172900 | 0.44941200  |
| H | 3.06767000  | -4.39504600 | -0.20565600 |
| H | -0.27068800 | -5.21877200 | -0.18589600 |
| H | -1.44995300 | -4.06865600 | 0.46108400  |
| H | 0.09290000  | -4.33958900 | 1.30571800  |
| H | -3.04731100 | -2.23230800 | 3.74568900  |
| H | -2.88089900 | -0.48265900 | 4.06414800  |
| H | -1.66726400 | -1.62633700 | 4.70239100  |
| H | 3.04453100  | -0.56112800 | 4.51775000  |
| H | 3.35159600  | 1.08453300  | 3.89692600  |
| H | 4.41555000  | -0.26548700 | 3.41235000  |
| H | 0.90054800  | 5.59613700  | -0.04629300 |
| H | -2.10066100 | -0.43286200 | -0.60705600 |
| H | -4.50762700 | -0.98995900 | -0.68883500 |
| H | -5.49037600 | 3.10800300  | 0.23052000  |
| H | -3.10104700 | 3.67996400  | 0.30365100  |
| H | 5.12535000  | 1.95401400  | -0.57381800 |
| H | 5.28710200  | 3.47135300  | 0.34342800  |
| H | 5.12334200  | 3.52565700  | -1.40771700 |
| H | -7.11440500 | 1.26493800  | -1.07906300 |
| H | -7.12085600 | 0.98280500  | 0.65496000  |
| H | -6.80113300 | -0.37432000 | -0.45865300 |

**H -1581.496673**

|    |             |            |             |
|----|-------------|------------|-------------|
| Rh | -0.42829900 | 1.17993900 | -0.45386800 |
| C  | -0.44788300 | 2.93560900 | -1.80627100 |
| C  | -1.75831900 | 2.36791500 | -1.78891400 |



|    |             |             |             |
|----|-------------|-------------|-------------|
| H  | -0.26485700 | -3.84538100 | -3.10061300 |
| H  | -1.19850700 | -2.34912000 | -2.97829200 |
| H  | -1.00140900 | -3.40160800 | -1.55568800 |
| H  | 1.03123500  | 0.54558700  | -4.09225200 |
| H  | -0.32436500 | -0.60596500 | -4.07081300 |
| H  | 1.18021500  | -1.02255400 | -4.89830500 |
| H  | 4.17957100  | 0.56053400  | -1.81084200 |
| H  | 2.99719600  | 1.10433300  | -3.02207800 |
| H  | 4.15224000  | -0.17475200 | -3.41971800 |
| H  | 4.63632600  | -2.66777100 | -0.61326200 |
| H  | 3.73694500  | -2.13070900 | 0.81002100  |
| H  | 4.58004100  | -0.94303000 | -0.21611900 |
| H  | 0.56798700  | -2.63948800 | 3.71261300  |
| H  | 0.09109000  | -1.00825400 | 4.19386800  |
| H  | -2.09864600 | -1.87519700 | 4.75221900  |
| H  | -1.68656200 | -3.44596400 | 4.05153400  |
| C  | 3.63056500  | 4.24279900  | 1.14244200  |
| C  | 4.03927700  | 2.88489800  | 1.15057700  |
| C  | 3.17929200  | 1.89259800  | 0.67255800  |
| C  | 1.92341700  | 2.28648600  | 0.19616600  |
| C  | 1.55778200  | 3.63146300  | 0.22513700  |
| C  | 2.38087100  | 4.64936100  | 0.68332400  |
| N  | 0.83426600  | 1.56391600  | -0.30902200 |
| C  | -0.11488400 | 2.45598700  | -0.53036400 |
| O  | 0.27016400  | 3.72107800  | -0.24339700 |
| C  | -1.49591900 | 2.24416700  | -0.97345300 |
| C  | -1.76997900 | 1.11314800  | -1.72532000 |
| C  | -4.16328400 | 1.61135100  | -1.66599000 |
| C  | -3.87948300 | 2.77131400  | -0.95474800 |
| C  | -2.57450200 | 3.11908600  | -0.58220600 |
| H  | 4.31831300  | 4.99435000  | 1.52026500  |
| H  | 3.47436500  | 0.84942900  | 0.68413400  |
| H  | -0.95958300 | 0.46360300  | -2.03653400 |
| H  | -4.69385600 | 3.42418300  | -0.65844600 |
| C  | -3.10276700 | 0.74994000  | -2.04966900 |
| H  | -3.28600400 | -0.06662500 | -2.74070800 |
| Br | -3.36224600 | -0.69695700 | 0.07009900  |
| H  | 2.06689800  | 5.68721000  | 0.69240700  |
| H  | -5.18337200 | 1.36768100  | -1.94415300 |
| C  | 5.40194600  | 2.52822900  | 1.69560500  |
| H  | 6.19405200  | 3.07924700  | 1.17452000  |
| H  | 5.47957700  | 2.78544500  | 2.75938100  |
| H  | 5.60817900  | 1.45851600  | 1.59362100  |
| C  | -2.38436300 | 4.36817000  | 0.23043200  |

|   |             |            |             |
|---|-------------|------------|-------------|
| H | -1.82112400 | 4.17166700 | 1.14931000  |
| H | -1.82452800 | 5.12562400 | -0.32955600 |
| H | -3.35476800 | 4.78973700 | 0.50229600  |

I -1581.466461

|    |           |           |           |
|----|-----------|-----------|-----------|
| 45 | 0.871978  | -0.838924 | -0.508785 |
| 6  | 1.813661  | -2.670073 | -1.331066 |
| 6  | 0.652748  | -2.391599 | -2.105779 |
| 6  | 0.807106  | -1.070948 | -2.715659 |
| 6  | 2.079424  | -0.549842 | -2.324401 |
| 6  | 2.694726  | -1.512899 | -1.422205 |
| 6  | 2.106420  | -3.915159 | -0.561800 |
| 6  | -0.526120 | -3.279631 | -2.305573 |
| 6  | -0.132381 | -0.463558 | -3.700773 |
| 6  | 2.696751  | 0.725637  | -2.786531 |
| 6  | 4.059874  | -1.412310 | -0.835713 |
| 6  | 0.701949  | -1.754743 | 3.976712  |
| 6  | -0.632128 | -1.625347 | 4.727591  |
| 6  | -1.547728 | -1.217840 | 3.591555  |
| 7  | -1.020037 | -1.110846 | 2.405921  |
| 6  | 0.322544  | -1.418527 | 2.545844  |
| 8  | 1.131383  | -1.417063 | 1.608022  |
| 8  | -2.796003 | -1.008494 | 3.920303  |
| 1  | 1.195620  | -4.472631 | -0.331280 |
| 1  | 2.630548  | -3.695852 | 0.372354  |
| 1  | 2.757215  | -4.564600 | -1.162407 |
| 1  | -0.432957 | -3.779318 | -3.279988 |
| 1  | -1.459384 | -2.708991 | -2.321831 |
| 1  | -0.591429 | -4.052597 | -1.536766 |
| 1  | -0.031552 | 0.622879  | -3.743229 |
| 1  | -1.173136 | -0.715587 | -3.486664 |
| 1  | 0.105580  | -0.860160 | -4.698060 |
| 1  | 3.330483  | 1.175538  | -2.018743 |
| 1  | 1.943110  | 1.452411  | -3.097709 |
| 1  | 3.332437  | 0.508930  | -3.656312 |
| 1  | 4.780411  | -1.824098 | -1.557391 |
| 1  | 4.148212  | -1.992221 | 0.086304  |
| 1  | 4.345030  | -0.376235 | -0.638519 |
| 1  | 1.129507  | -2.760798 | 4.023271  |
| 1  | 1.462133  | -1.050420 | 4.328840  |
| 1  | -0.633484 | -0.854361 | 5.504003  |
| 1  | -0.984483 | -2.559099 | 5.175398  |
| 6  | 3.247609  | 3.702228  | 2.388075  |
| 6  | 3.662715  | 2.348725  | 2.332389  |

|    |           |           |           |   |             |             |             |
|----|-----------|-----------|-----------|---|-------------|-------------|-------------|
| 6  | 2.909379  | 1.415615  | 1.612735  | C | -1.07218900 | -2.20138500 | 2.59325400  |
| 6  | 1.753899  | 1.868436  | 0.968171  | N | -0.15590200 | -1.75406000 | 1.64267600  |
| 6  | 1.376518  | 3.207761  | 1.052863  | C | 1.02016500  | -1.53925700 | 2.23838400  |
| 6  | 2.096795  | 4.164622  | 1.751924  | O | 1.99580800  | -1.16871800 | 1.52168500  |
| 7  | 0.795900  | 1.221487  | 0.177874  | O | -2.24142500 | -2.50161900 | 2.39813900  |
| 6  | -0.095884 | 2.136518  | -0.150092 | H | -0.11389200 | -4.56706300 | -0.21607200 |
| 8  | 0.205371  | 3.360839  | 0.343799  | H | 1.57610100  | -4.60398100 | 0.33227400  |
| 6  | -1.335583 | 1.951031  | -0.901809 | H | 1.13203200  | -5.32085700 | -1.22396700 |
| 6  | -2.003813 | 0.720142  | -0.745706 | H | -1.05992000 | -3.87288800 | -3.09739000 |
| 6  | -3.715555 | 1.434645  | -2.276914 | H | -1.75844100 | -2.25988500 | -2.91883200 |
| 6  | -3.057586 | 2.655463  | -2.431806 | H | -1.65961400 | -3.36050900 | -1.51915500 |
| 6  | -1.867341 | 2.952328  | -1.754430 | H | 0.65993700  | 0.62515400  | -3.44777500 |
| 6  | 4.918344  | 1.925995  | 3.058356  | H | -0.77171300 | -0.40580100 | -3.67062400 |
| 1  | 3.850161  | 4.408244  | 2.953066  | H | 0.67494900  | -0.66242600 | -4.65697900 |
| 1  | 3.204866  | 0.372927  | 1.567788  | H | 4.11044200  | -0.30712700 | -1.85293200 |
| 1  | 1.783209  | 5.201540  | 1.802383  | H | 2.88155500  | 0.65689400  | -2.70087900 |
| 1  | -1.605798 | -0.014502 | -0.047761 | H | 3.70833200  | -0.66297000 | -3.53733600 |
| 1  | -3.472144 | 3.404532  | -3.100629 | H | 4.28789600  | -3.50613300 | -1.37044400 |
| 1  | 5.792863  | 2.478308  | 2.692997  | H | 3.53209100  | -3.48567400 | 0.23107300  |
| 1  | 5.115012  | 0.857422  | 2.927289  | H | 4.31900100  | -2.02318800 | -0.40472500 |
| 1  | 4.840803  | 2.126641  | 4.134083  | H | 1.81182300  | -2.52383000 | 3.97242100  |
| 6  | -3.187922 | 0.458827  | -1.428593 | H | 1.28937800  | -0.86007000 | 4.25422800  |
| 1  | -3.699537 | -0.489501 | -1.292664 | H | -0.95118300 | -1.64291800 | 4.67141200  |
| 35 | -4.020736 | -0.442346 | 2.519943  | H | -0.44228400 | -3.30111700 | 4.34115600  |
| 1  | -4.639795 | 1.248298  | -2.816597 | C | 2.97171700  | 3.81655400  | 1.74454300  |
| 6  | -1.211175 | 4.293950  | -1.978850 | C | 3.56048100  | 2.55422200  | 1.43837500  |
| 1  | -1.316617 | 4.944799  | -1.103722 | C | 2.80264000  | 1.55254900  | 0.84275000  |
| 1  | -0.139169 | 4.202066  | -2.184349 | C | 1.45141800  | 1.82747100  | 0.55747200  |
| 1  | -1.677577 | 4.800623  | -2.828478 | C | 0.93085600  | 3.09951800  | 0.84942200  |
|    |           |           |           | C | 1.64855800  | 4.12109400  | 1.45496100  |
|    |           |           |           | N | 0.44338600  | 1.07943300  | -0.03456300 |
|    |           |           |           | C | -0.60054500 | 1.90511100  | -0.13097900 |
|    |           |           |           | O | -0.35395000 | 3.12803400  | 0.41144300  |
|    |           |           |           | C | -1.86658100 | 1.74855900  | -0.81059500 |
|    |           |           |           | C | -2.26329100 | 0.37886100  | -1.19966800 |
|    |           |           |           | C | -4.11611100 | 1.28805300  | -2.53039500 |
|    |           |           |           | C | -3.78738300 | 2.55689100  | -2.02151900 |
|    |           |           |           | C | -2.68512500 | 2.83236200  | -1.17681200 |
|    |           |           |           | H | 3.59230200  | 4.57400700  | 2.21498300  |
|    |           |           |           | H | 1.20767200  | 5.08715900  | 1.67296700  |
|    |           |           |           | H | -1.42131400 | -0.29787300 | -1.33507100 |
|    |           |           |           | H | -4.40719900 | 3.39952000  | -2.31419400 |
|    |           |           |           | C | -3.36615000 | 0.20980800  | -2.14729500 |
|    |           |           |           | H | -3.58585100 | -0.79456100 | -2.49279700 |

**TSIJ -1581.438065**

|    |             |             |             |  |  |  |  |
|----|-------------|-------------|-------------|--|--|--|--|
| Rh | 0.91680300  | -1.21408800 | -0.40323000 |  |  |  |  |
| C  | 1.17979100  | -3.19627000 | -1.24671500 |  |  |  |  |
| C  | 0.22727200  | -2.51165200 | -2.11284000 |  |  |  |  |
| C  | 0.87932100  | -1.36725300 | -2.66668700 |  |  |  |  |
| C  | 2.23632300  | -1.32487200 | -2.15575000 |  |  |  |  |
| C  | 2.43387800  | -2.49374700 | -1.32784600 |  |  |  |  |
| C  | 0.92709400  | -4.48666500 | -0.53896700 |  |  |  |  |
| C  | -1.14479400 | -3.01241300 | -2.41934500 |  |  |  |  |
| C  | 0.32030000  | -0.39429500 | -3.65244800 |  |  |  |  |
| C  | 3.28878600  | -0.34952400 | -2.57121500 |  |  |  |  |
| C  | 3.70877900  | -2.89095900 | -0.66740300 |  |  |  |  |
| C  | 1.04141900  | -1.78643600 | 3.72512400  |  |  |  |  |
| C  | -0.39221800 | -2.27210000 | 3.97241900  |  |  |  |  |

|          |                     |             |             |             |                     |             |             |
|----------|---------------------|-------------|-------------|-------------|---------------------|-------------|-------------|
| Br       | -3.16122000         | -0.53860500 | 0.49275500  | 1           | 3.293273            | -3.588418   | 0.299513    |
| C        | -2.46162600         | 4.27701800  | -0.80306100 | 1           | 4.310827            | -2.145417   | 0.090605    |
| H        | -2.49955200         | 4.42339200  | 0.28051400  | 1           | 0.900857            | -2.992781   | 4.264048    |
| H        | -1.48811200         | 4.63842800  | -1.14838800 | 1           | 0.201754            | -1.427968   | 4.680543    |
| H        | -3.23626000         | 4.89592400  | -1.26097400 | 1           | -1.881939           | -2.132183   | 3.695678    |
| H        | 3.23837100          | 0.58907500  | 0.62077700  | 1           | -1.141586           | -3.640181   | 3.161137    |
| C        | 5.01560800          | 2.33194800  | 1.76645600  | 6           | 3.272324            | 4.374067    | 0.922401    |
| H        | 5.65482800          | 3.01717200  | 1.19541300  | 6           | 3.653842            | 3.066952    | 1.353134    |
| H        | 5.21208100          | 2.52168200  | 2.82855700  | 6           | 2.798166            | 1.989881    | 1.146546    |
| H        | 5.32563100          | 1.30784800  | 1.53908800  | 6           | 1.577279            | 2.250297    | 0.505953    |
| H        | -4.95707800         | 1.17610300  | -3.20528400 | 6           | 1.233957            | 3.553093    | 0.110180    |
|          |                     |             |             | 6           | 2.059479            | 4.652081    | 0.301704    |
| <b>J</b> | <b>-1581.438065</b> |             |             | 7           | 0.541374            | 1.411172    | 0.139922    |
| 45       | 1.161450            | -0.711807   | -0.206175   | 6           | -0.378438           | 2.190813    | -0.413451   |
| 6        | 1.195786            | -2.627377   | -1.273435   | 8           | -0.000363           | 3.497185    | -0.470168   |
| 6        | 0.474346            | -1.621362   | -2.037726   | 6           | -1.710803           | 1.846355    | -0.849161   |
| 6        | 1.422524            | -0.588859   | -2.445095   | 6           | -2.355049           | 0.691353    | -0.165635   |
| 6        | 2.676195            | -0.901640   | -1.870111   | 6           | -4.339048           | 0.974820    | -1.592590   |
| 6        | 2.536406            | -2.159687   | -1.121606   | 6           | -3.711895           | 2.105164    | -2.155603   |
| 6        | 0.633046            | -3.919997   | -0.782568   | 6           | -2.419014           | 2.573050    | -1.810252   |
| 6        | -0.944848           | -1.713135   | -2.477096   | 6           | 4.983162            | 2.881953    | 2.039424    |
| 6        | 1.098919            | 0.575074    | -3.322207   | 1           | 3.965346            | 5.192392    | 1.096815    |
| 6        | 3.950835            | -0.142982   | -2.017014   | 1           | 3.034606            | 0.990939    | 1.501666    |
| 6        | 3.655633            | -2.854397   | -0.423263   | 1           | 1.780877            | 5.651790    | -0.011427   |
| 6        | 0.327808            | -2.149527   | 3.866308    | 1           | -1.711824           | -0.168205   | 0.058918    |
| 6        | -0.998085           | -2.555146   | 3.208703    | 1           | -4.248118           | 2.656507    | -2.923138   |
| 6        | -0.888969           | -2.010161   | 1.786349    | 1           | 5.028205            | 3.460610    | 2.970319    |
| 7        | 0.339522            | -1.435245   | 1.597917    | 1           | 5.804003            | 3.234756    | 1.403040    |
| 6        | 1.113834            | -1.490233   | 2.736325    | 1           | 5.164010            | 1.830941    | 2.282205    |
| 8        | 2.266234            | -1.068977   | 2.806827    | 6           | -3.684941           | 0.269953    | -0.621838   |
| 8        | -1.773161           | -2.070185   | 0.926229    | 1           | -4.111861           | -0.612390   | -0.156865   |
| 1        | -0.411285           | -3.812619   | -0.482680   | 35          | -2.786791           | 1.359898    | 1.786944    |
| 1        | 1.203312            | -4.311398   | 0.062916    | 6           | -1.891802           | 3.790439    | -2.525002   |
| 1        | 0.680127            | -4.659627   | -1.593421   | 1           | -1.940473           | 4.671458    | -1.875233   |
| 1        | -0.992141           | -2.297944   | -3.407347   | 1           | -0.850295           | 3.667707    | -2.832681   |
| 1        | -1.362427           | -0.725188   | -2.688851   | 1           | -2.495735           | 3.993257    | -3.412627   |
| 1        | -1.561895           | -2.215493   | -1.729440   | 1           | -5.324657           | 0.679718    | -1.934309   |
| 1        | 1.784386            | 1.410407    | -3.158793   |             |                     |             |             |
| 1        | 0.074762            | 0.924235    | -3.163415   |             |                     |             |             |
| 1        | 1.182618            | 0.271450    | -4.374310   |             |                     |             |             |
| 1        | 4.530870            | -0.140209   | -1.089415   |             |                     |             |             |
| 1        | 3.779593            | 0.888009    | -2.334059   |             |                     |             |             |
| 1        | 4.568222            | -0.632654   | -2.783208   |             |                     |             |             |
| 1        | 4.265929            | -3.383812   | -1.168647   |             |                     |             |             |
|          |                     |             |             | <b>TSJK</b> | <b>-1581.449722</b> |             |             |
|          |                     |             |             | Rh          | 1.20275300          | -0.71031700 | -0.50252000 |
|          |                     |             |             | C           | 1.00460700          | -2.46364400 | -1.81534800 |
|          |                     |             |             | C           | 0.97778100          | -1.25717200 | -2.64675600 |
|          |                     |             |             | C           | 2.21727500          | -0.57867900 | -2.47473300 |
|          |                     |             |             | C           | 3.00899500          | -1.33236900 | -1.50775400 |

|   |             |             |             |                       |             |             |             |
|---|-------------|-------------|-------------|-----------------------|-------------|-------------|-------------|
| C | 2.26225800  | -2.52231600 | -1.14087400 | C                     | -3.69429500 | 1.23584900  | -1.88523700 |
| C | -0.10178700 | -3.45585500 | -1.72445800 | C                     | -2.39539100 | 1.81020000  | -1.73784000 |
| C | -0.12047400 | -0.89276300 | -3.58754400 | C                     | 5.20565700  | 3.44372700  | 1.23218600  |
| C | 2.66662500  | 0.65850700  | -3.17574300 | H                     | 3.63447800  | 5.62123400  | 0.95321400  |
| C | 4.39973200  | -1.01999300 | -1.07890800 | H                     | 3.56048200  | 1.31970500  | 0.63625300  |
| C | 2.74624300  | -3.60652800 | -0.23590300 | H                     | 1.22471700  | 5.78044900  | 0.32884300  |
| C | 0.39908500  | -2.18828300 | 3.53131800  | H                     | -1.61628700 | -0.22851700 | 0.74560600  |
| C | -1.05206500 | -2.65539800 | 3.70088600  | H                     | -4.23867100 | 1.45751100  | -2.80002000 |
| C | -1.74574900 | -2.15929000 | 2.42867100  | H                     | 5.35107900  | 3.91768400  | 2.21035900  |
| N | -0.82257500 | -1.55553200 | 1.57383000  | H                     | 5.82447300  | 3.99489700  | 0.51339800  |
| C | 0.38436300  | -1.55716300 | 2.15012100  | H                     | 5.58526900  | 2.41939600  | 1.29252400  |
| O | 1.42940900  | -1.09916000 | 1.60145700  | C                     | -3.64400600 | 0.16741100  | 0.25583000  |
| O | -2.93960900 | -2.25948300 | 2.17995100  | H                     | -4.07584200 | -0.45201100 | 1.03435700  |
| H | -1.07965400 | -2.98137600 | -1.84204500 | Br                    | -2.27964000 | 1.64119600  | 2.29217400  |
| H | -0.08164300 | -4.00481200 | -0.78071600 | C                     | -1.86744300 | 2.67502800  | -2.85171700 |
| H | 0.00781100  | -4.18495000 | -2.54020200 | H                     | -2.34999100 | 3.65979000  | -2.81486700 |
| H | 0.03883800  | -1.41798300 | -4.53948200 | H                     | -0.78889700 | 2.83135500  | -2.79490200 |
| H | -0.13779100 | 0.17900800  | -3.79853900 | H                     | -2.10851600 | 2.23206900  | -3.82296200 |
| H | -1.09794100 | -1.19937100 | -3.20633100 | H                     | -5.28801300 | 0.00376500  | -1.11350400 |
| H | 3.30436200  | 1.27677100  | -2.53943900 |                       |             |             |             |
| H | 1.82359000  | 1.25923500  | -3.52416000 | <b>K -1581.527772</b> |             |             |             |
| H | 3.25840200  | 0.37080200  | -4.05565400 | Rh                    | -0.06018500 | -1.27731600 | 0.60572100  |
| H | 4.57587500  | -1.31192900 | -0.04001300 | C                     | -0.90253000 | -2.64006900 | 2.10127600  |
| H | 4.63641700  | 0.03881200  | -1.20181100 | C                     | -1.40500200 | -3.00231500 | 0.80111700  |
| H | 5.09593700  | -1.59563300 | -1.70632700 | C                     | -0.28529100 | -3.40112700 | -0.03641400 |
| H | 3.33615400  | -4.32448900 | -0.82128400 | C                     | 0.90679400  | -3.27321800 | 0.74311600  |
| H | 1.91832500  | -4.15126800 | 0.22368600  | C                     | 0.53009100  | -2.77881900 | 2.06542200  |
| H | 3.39061100  | -3.21429000 | 0.55464900  | C                     | -1.72788500 | -2.23861600 | 3.27797000  |
| H | 1.13685600  | -2.99618500 | 3.56196900  | C                     | -2.83101000 | -2.99446100 | 0.38413600  |
| H | 0.70385200  | -1.43873500 | 4.26967500  | C                     | -0.38299300 | -3.98880900 | -1.40312300 |
| H | -1.55306500 | -2.22853400 | 4.57488300  | C                     | 2.27831700  | -3.66550700 | 0.31590500  |
| H | -1.14993600 | -3.74401400 | 3.76573000  | C                     | 1.46352600  | -2.56086200 | 3.20449900  |
| C | 3.07673100  | 4.71430500  | 0.73671400  | C                     | -0.27872100 | 2.32545400  | 3.37896300  |
| C | 3.75102700  | 3.46878900  | 0.82957400  | C                     | 0.98427100  | 2.89317400  | 4.04994300  |
| C | 3.06631300  | 2.28233000  | 0.55905300  | C                     | 2.14163900  | 2.11756800  | 3.44582800  |
| C | 1.71478300  | 2.37883000  | 0.20988700  | N                     | 1.58275000  | 1.18687000  | 2.53747500  |
| C | 1.08771800  | 3.62355700  | 0.13364300  | C                     | 0.23250400  | 1.24913700  | 2.44978100  |
| C | 1.73319900  | 4.82486300  | 0.38924700  | O                     | -0.48258400 | 0.53206800  | 1.72971100  |
| N | 0.75109400  | 1.40767900  | -0.09238400 | O                     | 3.32720800  | 2.21562900  | 3.65384500  |
| C | -0.35860500 | 2.06916500  | -0.31187500 | H                     | -2.62876500 | -1.69985700 | 2.97387900  |
| O | -0.23023500 | 3.41005000  | -0.20959800 | H                     | -1.16555800 | -1.61561800 | 3.97723300  |
| C | -1.70684000 | 1.53208200  | -0.57227000 | H                     | -2.04476400 | -3.14284400 | 3.81494200  |
| C | -2.29976600 | 0.67550500  | 0.46756700  | H                     | -3.24114200 | -4.00442900 | 0.53239900  |
| C | -4.29993700 | 0.41154200  | -0.93068400 | H                     | -2.94327800 | -2.75019200 | -0.67554100 |



|    |             |             |             |
|----|-------------|-------------|-------------|
| H  | -3.42658800 | -2.30179200 | 0.98298500  |
| H  | 0.51944500  | -3.80682200 | -1.99025100 |
| H  | -1.24790400 | -3.61239700 | -1.95236900 |
| H  | -0.50178300 | -5.07708900 | -1.30471700 |
| H  | 3.05505300  | -3.16073300 | 0.89405600  |
| H  | 2.44371600  | -3.48045200 | -0.74844200 |
| H  | 2.39164600  | -4.74626200 | 0.48523900  |
| H  | 1.59891400  | -3.51629800 | 3.73172000  |
| H  | 1.07113500  | -1.83874200 | 3.92341900  |
| H  | 2.45015100  | -2.23354500 | 2.86714400  |
| H  | -0.83183500 | 3.06820200  | 2.79641100  |
| H  | -0.98409300 | 1.87623600  | 4.08508200  |
| H  | 0.99201200  | 2.75181600  | 5.13486000  |
| H  | 1.13180700  | 3.95947800  | 3.85547700  |
| C  | 4.72134600  | 1.23898700  | -1.93559800 |
| C  | 4.64630900  | 0.36258700  | -0.82490000 |
| C  | 3.40684200  | -0.13567000 | -0.41259600 |
| C  | 2.27032900  | 0.25733100  | -1.12701500 |
| C  | 2.39021900  | 1.12176600  | -2.21431200 |
| C  | 3.59908100  | 1.63920600  | -2.65656100 |
| N  | 0.90440700  | -0.03255100 | -0.97547200 |
| C  | 0.29169100  | 0.62972900  | -1.92927300 |
| O  | 1.12762000  | 1.34152200  | -2.71626800 |
| C  | -1.14627200 | 0.64266300  | -2.26815800 |
| C  | -2.00750800 | 1.63405100  | -1.77642900 |
| C  | -3.87358800 | 0.64112500  | -2.89455300 |
| C  | -3.02701100 | -0.32019400 | -3.44448000 |
| C  | -1.65625400 | -0.33173700 | -3.15986800 |
| C  | 5.91050300  | -0.01496500 | -0.08999400 |
| H  | 5.69576500  | 1.61429700  | -2.23544200 |
| H  | 3.33779500  | -0.80869300 | 0.43664500  |
| H  | 3.66274200  | 2.31335000  | -3.50361000 |
| H  | 2.15760100  | 0.55579700  | 1.98374600  |
| H  | -3.42747800 | -1.06790600 | -4.12276300 |
| H  | 6.36979600  | 0.86360000  | 0.38013700  |
| H  | 6.65498300  | -0.43823800 | -0.77457800 |
| H  | 5.71352500  | -0.75193900 | 0.69467100  |
| C  | -3.36636600 | 1.64303800  | -2.06491200 |
| H  | -4.01486200 | 2.41566000  | -1.66776000 |
| Br | -1.28591700 | 3.13031500  | -0.71280000 |
| C  | -0.74092300 | -1.30675800 | -3.86103600 |
| H  | -0.21286500 | -0.80384700 | -4.68177800 |
| H  | 0.01987000  | -1.72766100 | -3.19718700 |
| H  | -1.31312600 | -2.13092700 | -4.29562300 |

|   |             |            |             |
|---|-------------|------------|-------------|
| H | -4.93372400 | 0.63151700 | -3.12992600 |
|---|-------------|------------|-------------|

**TSHI' -1581.428777**

|    |             |             |             |
|----|-------------|-------------|-------------|
| Rh | 1.42662100  | 0.89752600  | 0.28517800  |
| C  | 2.15631600  | 2.27119000  | -1.26545800 |
| C  | 0.98699400  | 2.90567100  | -0.65236200 |
| C  | 1.25623600  | 3.09772600  | 0.72985600  |
| C  | 2.59181300  | 2.58244100  | 1.00011700  |
| C  | 3.15805200  | 2.11797700  | -0.25485900 |
| C  | 2.30368800  | 1.96851700  | -2.71814300 |
| C  | -0.21265400 | 3.36410500  | -1.40925500 |
| C  | 0.38009300  | 3.75686000  | 1.74288500  |
| C  | 3.31556200  | 2.71099400  | 2.29438900  |
| C  | 4.54178900  | 1.59601800  | -0.43915300 |
| C  | 2.77206000  | -3.03543600 | -1.02062100 |
| C  | 1.91182200  | -3.48800900 | -2.21225100 |
| C  | 0.84816100  | -2.38200700 | -2.33430600 |
| N  | 1.15632600  | -1.33698600 | -1.47996900 |
| C  | 2.16878100  | -1.68042200 | -0.69639400 |
| O  | 2.57585300  | -0.93181500 | 0.24907500  |
| O  | -0.14154200 | -2.41363500 | -3.05189900 |
| H  | 1.36088000  | 1.63705700  | -3.16044800 |
| H  | 3.06451600  | 1.20619900  | -2.89761000 |
| H  | 2.61320200  | 2.88520000  | -3.24005600 |
| H  | 0.03415800  | 4.32226900  | -1.88889000 |
| H  | -1.07537100 | 3.53734200  | -0.76229300 |
| H  | -0.48643200 | 2.66909300  | -2.20710800 |
| H  | 0.41636400  | 3.23618900  | 2.70433800  |
| H  | -0.65805700 | 3.81664000  | 1.40982400  |
| H  | 0.73705500  | 4.78172400  | 1.91213500  |
| H  | 4.13689200  | 1.99654200  | 2.37870400  |
| H  | 2.64608000  | 2.59689300  | 3.15018500  |
| H  | 3.74562800  | 3.72223600  | 2.34549600  |
| H  | 5.21703300  | 2.44603800  | -0.60894300 |
| H  | 4.61372200  | 0.93055700  | -1.30190100 |
| H  | 4.89284500  | 1.06384100  | 0.44853600  |
| H  | 3.83639100  | -2.92826800 | -1.25389900 |
| H  | 2.69229700  | -3.69603700 | -0.15063800 |
| H  | 1.42062100  | -4.45342800 | -2.06168600 |
| H  | 2.47686500  | -3.54588500 | -3.14854900 |
| Br | -1.46416400 | -0.28067300 | -0.94148100 |
| C  | 1.97619200  | -1.70286600 | 5.41816400  |
| C  | 2.88286000  | -1.18294300 | 4.44867500  |
| C  | 2.40196100  | -0.59519900 | 3.28302700  |

|    |              |             |             |    |             |             |             |
|----|--------------|-------------|-------------|----|-------------|-------------|-------------|
| C  | 1.00917500   | -0.53245300 | 3.10323000  | C  | 3.00543100  | -1.79330800 | -0.05859200 |
| C  | 0.15931000   | -1.06201200 | 4.08539800  | O  | 3.72928300  | -1.35643600 | 0.81244500  |
| C  | 0.59757300   | -1.65577300 | 5.26147800  | O  | 0.19233500  | -1.59222100 | -2.10162100 |
| N  | 0.21559500   | -0.01138000 | 2.08741300  | H  | 0.24960300  | 2.21724400  | -2.97716100 |
| C  | -1.04145300  | -0.23758200 | 2.46687600  | H  | 1.78625800  | 1.38025800  | -3.28835400 |
| O  | -1.12011300  | -0.87349500 | 3.66661600  | H  | 1.72009000  | 3.14807800  | -3.27579900 |
| C  | -2.30083700  | 0.07781700  | 1.82456800  | H  | -0.06586000 | 4.74627100  | -1.01901800 |
| C  | -2.25562400  | 0.95016800  | 0.63531700  | H  | -0.91756400 | 3.99299900  | 0.33271900  |
| C  | -3.50378200  | 1.37626800  | 0.01486500  | H  | -1.01635500 | 3.29377900  | -1.30512900 |
| C  | -4.70093500  | 0.88926200  | 0.47187200  | H  | 1.51834500  | 2.93372500  | 3.05978200  |
| C  | -4.69934800  | 0.01431300  | 1.56891900  | H  | 0.15000700  | 3.75013400  | 2.27146700  |
| C  | -3.54159800  | -0.40406600 | 2.27316000  | H  | 1.74902700  | 4.50798300  | 2.29455100  |
| C  | 4.36521200   | -1.28613700 | 4.70618700  | H  | 4.51175900  | 1.08486700  | 1.44149700  |
| H  | 2.38607200   | -2.15752100 | 6.31566400  | H  | 3.58224200  | 1.96869500  | 2.67380000  |
| H  | 3.08211200   | -0.21890100 | 2.53155700  | H  | 4.61164500  | 2.85117900  | 1.53727300  |
| H  | -0.08943400  | -2.05405400 | 5.99945700  | H  | 4.68523000  | 2.00497400  | -1.79910500 |
| H  | -1.48013400  | 1.71311800  | 0.66652400  | H  | 3.69210000  | 0.64580700  | -2.33929600 |
| H  | -3.44697300  | 2.07108700  | -0.81613300 | H  | 4.59696500  | 0.54244600  | -0.80925500 |
| H  | -5.65276400  | -0.37696400 | 1.91104900  | H  | 4.24398200  | -2.98106500 | -1.35051000 |
| H  | 4.67347000   | -2.33386300 | 4.80882500  | H  | 3.22748100  | -3.91599700 | -0.24789600 |
| H  | 4.63847900   | -0.77933300 | 5.63989900  | H  | 1.48837100  | -3.93332300 | -1.90988300 |
| H  | 4.94467800   | -0.83954200 | 3.89294300  | H  | 2.44238400  | -2.86980800 | -2.95150600 |
| H  | -5.63698600  | 1.17038700  | 0.00252100  | Br | -1.13584900 | -0.27526200 | -1.06661000 |
| C  | -3.75866200  | -1.34521900 | 3.43193100  | C  | 1.58462700  | -1.21660800 | 5.75580200  |
| H  | -3.15617400  | -2.25291600 | 3.33238800  | C  | 2.55839300  | -0.98273200 | 4.75119200  |
| H  | -3.49260900  | -0.87886200 | 4.38555800  | C  | 2.16766700  | -0.56505700 | 3.47670600  |
| H  | -4.81120000  | -1.63321100 | 3.47617300  | C  | 0.79960200  | -0.39060600 | 3.23402400  |
| I' | -1581.458775 |             |             | C  | -0.12363400 | -0.66333600 | 4.24466300  |
| Rh | 1.14246000   | 0.80591900  | 0.20463700  | C  | 0.22019900  | -1.06959400 | 5.52567700  |
| C  | 1.65841300   | 2.29231100  | -1.34259500 | N  | 0.08053000  | 0.00272800  | 2.09397500  |
| C  | 0.88567700   | 2.99945700  | -0.31936600 | C  | -1.19382300 | -0.08516100 | 2.43993400  |
| C  | 1.59715400   | 2.91515400  | 0.90898600  | O  | -1.37640400 | -0.47053700 | 3.72521100  |
| C  | 2.81898900   | 2.16029500  | 0.67034700  | C  | -2.41237000 | 0.11808600  | 1.65273200  |
| C  | 2.86985100   | 1.82925900  | -0.74091100 | C  | -2.39698000 | 1.11432100  | 0.62552900  |
| C  | 1.32650300   | 2.24066200  | -2.79625600 | C  | -3.54280800 | 1.35512000  | -0.17133800 |
| C  | -0.35793100  | 3.78127400  | -0.58046100 | C  | -4.68251200 | 0.58743200  | 0.02716200  |
| C  | 1.22117300   | 3.54823500  | 2.20640800  | C  | -4.68284400 | -0.38928300 | 1.02351600  |
| C  | 3.93539100   | 1.98980800  | 1.64087400  | C  | -3.56838200 | -0.66045200 | 1.84924900  |
| C  | 4.01760500   | 1.20169900  | -1.45699600 | C  | 4.01797500  | -1.19288900 | 5.07671400  |
| C  | 3.24939200   | -3.03662600 | -0.89971600 | H  | 1.91817900  | -1.53837900 | 6.73864300  |
| C  | 2.10887500   | -3.03303900 | -1.92182500 | H  | 2.89499000  | -0.42682700 | 2.68685900  |
| C  | 1.27726700   | -1.84622600 | -1.47364200 | H  | -0.52498100 | -1.26733700 | 6.28810700  |
| N  | 1.78575300   | -1.17781200 | -0.44752300 | H  | -1.60460500 | 1.85122800  | 0.63763800  |
|    |              |             |             | H  | -3.51943200 | 2.14861900  | -0.91102300 |

|   |             |             |             |
|---|-------------|-------------|-------------|
| H | -5.57606300 | -0.99037300 | 1.16824800  |
| H | 4.19237500  | -2.19881800 | 5.47682500  |
| H | 4.35871500  | -0.48124400 | 5.83958200  |
| H | 4.64766200  | -1.06554800 | 4.19139800  |
| C | -3.68638900 | -1.78706100 | 2.84620400  |
| H | -2.80340800 | -2.43343600 | 2.84067400  |
| H | -3.80998400 | -1.40955500 | 3.86684100  |
| H | -4.55915100 | -2.39999400 | 2.60695800  |
| H | -5.56929300 | 0.74846800  | -0.57666000 |

**TSI' J -1581.440615**

|    |             |             |             |
|----|-------------|-------------|-------------|
| Rh | 1.53085800  | 0.79750000  | 0.35576700  |
| C  | 1.38806700  | 2.33172600  | -1.18669800 |
| C  | 0.94782600  | 3.00213000  | 0.03552600  |
| C  | 2.00194900  | 2.92788000  | 0.97555300  |
| C  | 3.13579100  | 2.24843600  | 0.33970200  |
| C  | 2.76342600  | 1.92103200  | -1.01049300 |
| C  | 0.63377100  | 2.20214600  | -2.46367600 |
| C  | -0.35556400 | 3.70479400  | 0.22825000  |
| C  | 2.00766300  | 3.48273800  | 2.36029600  |
| C  | 4.48436400  | 2.05529400  | 0.93927400  |
| C  | 3.64825600  | 1.35452900  | -2.06996600 |
| C  | 3.73584800  | -2.98254500 | -0.37527100 |
| C  | 2.78432200  | -3.03567300 | -1.57188900 |
| C  | 1.96530900  | -1.75060300 | -1.45786100 |
| N  | 2.29434100  | -1.08022200 | -0.29670000 |
| C  | 3.36577400  | -1.68437900 | 0.33619800  |
| O  | 3.95061900  | -1.23061700 | 1.31805000  |
| O  | 1.14747900  | -1.37693400 | -2.29722300 |
| H  | -0.42134800 | 2.45713900  | -2.35293700 |
| H  | 0.71853200  | 1.18493800  | -2.85874700 |
| H  | 1.07186700  | 2.88752400  | -3.20293000 |
| H  | -0.20660900 | 4.77764300  | 0.04334400  |
| H  | -0.73417900 | 3.60006500  | 1.24863700  |
| H  | -1.11701100 | 3.35906300  | -0.47396300 |
| H  | 2.60183900  | 2.86619900  | 3.04043100  |
| H  | 0.99815100  | 3.58446100  | 2.76537100  |
| H  | 2.46533200  | 4.48171000  | 2.34224700  |
| H  | 4.95057300  | 1.13350800  | 0.58585000  |
| H  | 4.44858300  | 2.03739100  | 2.03052300  |
| H  | 5.12223900  | 2.89931100  | 0.63879400  |
| H  | 4.08862600  | 2.18408200  | -2.64011300 |
| H  | 3.08720600  | 0.72752500  | -2.76646900 |
| H  | 4.46658200  | 0.77073300  | -1.64310000 |

|    |             |             |             |
|----|-------------|-------------|-------------|
| H  | 4.79311900  | -2.94772600 | -0.65707200 |
| H  | 3.61197100  | -3.81808500 | 0.32154100  |
| H  | 2.09968300  | -3.89031400 | -1.54850300 |
| H  | 3.29306100  | -3.05321800 | -2.54059500 |
| Br | -1.51326700 | -0.86677900 | -1.15477200 |
| C  | 1.31455100  | -1.40689700 | 5.60168100  |
| C  | 2.29552200  | -0.93119800 | 4.67758500  |
| C  | 1.90731000  | -0.47295300 | 3.42413400  |
| C  | 0.53773700  | -0.50825100 | 3.11329000  |
| C  | -0.39131200 | -0.98925500 | 4.05364100  |
| C  | -0.04454300 | -1.44884200 | 5.31660900  |
| N  | -0.14923800 | -0.12342500 | 1.98044600  |
| C  | -1.43110500 | -0.36638800 | 2.24853200  |
| O  | -1.62282900 | -0.89860300 | 3.49179300  |
| C  | -2.60076700 | -0.11924800 | 1.44987600  |
| C  | -2.37917500 | 0.54181700  | 0.13784000  |
| C  | -3.54835100 | 0.98273600  | -0.63368100 |
| C  | -4.80786700 | 0.69151700  | -0.20091100 |
| C  | -4.96570500 | -0.01711300 | 1.00930900  |
| C  | -3.91190000 | -0.42662700 | 1.85615100  |
| C  | 3.74671100  | -0.93870700 | 5.08614900  |
| H  | 1.65369500  | -1.75873200 | 6.57204600  |
| H  | 2.63480700  | -0.15669100 | 2.68419400  |
| H  | -0.77905300 | -1.81574800 | 6.02426300  |
| H  | -1.58373500 | 1.28259400  | 0.17453200  |
| H  | -3.36936500 | 1.52428000  | -1.55675800 |
| H  | -5.97607700 | -0.26096700 | 1.32457800  |
| H  | 4.04332800  | -1.92702300 | 5.45688600  |
| H  | 3.92927100  | -0.22468200 | 5.89957700  |
| H  | 4.39794100  | -0.67862900 | 4.24761000  |
| C  | -4.29352200 | -1.13731000 | 3.13041900  |
| H  | -3.79420600 | -2.10674600 | 3.21707000  |
| H  | -4.02496200 | -0.54937000 | 4.01375800  |
| H  | -5.37341400 | -1.30061700 | 3.14735700  |
| H  | -5.68216700 | 0.99085400  | -0.76798400 |

**TSHL -1581.431835**

|    |            |            |             |
|----|------------|------------|-------------|
| Rh | 0.83173900 | 1.18999900 | 0.17795400  |
| C  | 1.04521200 | 3.08785200 | -0.95548700 |
| C  | 0.48262600 | 3.35938400 | 0.36754600  |
| C  | 1.44274700 | 2.94801100 | 1.34811400  |
| C  | 2.57741600 | 2.37625000 | 0.64166500  |
| C  | 2.33431100 | 2.51115000 | -0.78796200 |
| C  | 0.36320700 | 3.38707100 | -2.24677200 |

|    |             |             |             |                       |             |             |             |
|----|-------------|-------------|-------------|-----------------------|-------------|-------------|-------------|
| C  | -0.80860800 | 4.05635400  | 0.62947800  | C                     | -4.69349100 | 1.43814500  | 0.94585200  |
| C  | 1.33453100  | 3.12274000  | 2.82402600  | C                     | -3.70242900 | 0.95256400  | 1.80996700  |
| C  | 3.84221000  | 1.88553500  | 1.25397200  | C                     | 3.64021300  | -1.99518200 | 4.54287800  |
| C  | 3.29265200  | 2.11525400  | -1.85908100 | H                     | 1.43317200  | -2.68379000 | 5.94512100  |
| C  | 2.75819300  | -2.67228200 | -1.57897100 | H                     | 2.67856600  | -0.59660200 | 2.38343800  |
| C  | 2.21141500  | -4.11394900 | -1.51827600 | H                     | -0.96855100 | -2.20339400 | 5.46459400  |
| C  | 0.81509100  | -3.92105900 | -0.95048800 | H                     | -1.42391300 | 0.10766100  | -0.61347100 |
| N  | 0.58474100  | -2.63629200 | -0.65349100 | H                     | -3.20280800 | 0.99742000  | -2.08533100 |
| C  | 1.64595200  | -1.82451900 | -0.96967300 | H                     | -5.61870700 | 1.80836000  | 1.37841800  |
| O  | 1.73140800  | -0.60266300 | -0.81599300 | H                     | 3.80641900  | -3.07895000 | 4.57876100  |
| O  | -0.04682200 | -4.78778600 | -0.75994100 | H                     | 3.91100400  | -1.59744100 | 5.52850400  |
| H  | -0.71379900 | 3.20691900  | -2.18520900 | H                     | 4.33148700  | -1.57276500 | 3.80693500  |
| H  | 0.77539100  | 2.79875200  | -3.06930300 | C                     | -3.95989300 | 0.96653400  | 3.29816700  |
| H  | 0.50275500  | 4.45022500  | -2.48759500 | H                     | -4.14504300 | -0.04278200 | 3.68277000  |
| H  | -0.63573200 | 5.14109200  | 0.58781500  | H                     | -3.11455300 | 1.37510100  | 3.86182200  |
| H  | -1.20509400 | 3.82006400  | 1.61925800  | H                     | -4.84151700 | 1.57464400  | 3.51925200  |
| H  | -1.56324300 | 3.81487500  | -0.12260300 | H                     | -5.32513300 | 1.84123600  | -1.07154700 |
| H  | 1.87100000  | 2.34178200  | 3.36726200  |                       |             |             |             |
| H  | 0.29507200  | 3.13996800  | 3.15844200  |                       |             |             |             |
| H  | 1.78884500  | 4.08676900  | 3.09225200  | <b>L -1581.463555</b> |             |             |             |
| H  | 4.27910400  | 1.06754000  | 0.67489100  | Rh                    | 1.08909000  | 1.08592400  | 0.29783100  |
| H  | 3.69990000  | 1.56277900  | 2.28691000  | C                     | 1.74858800  | 2.45023000  | -1.30260900 |
| H  | 4.56989400  | 2.71051500  | 1.25657300  | C                     | 0.77579700  | 3.16901600  | -0.48320700 |
| H  | 4.06461200  | 2.89138600  | -1.94887100 | C                     | 1.26704300  | 3.23240100  | 0.85620500  |
| H  | 2.80175500  | 2.01263900  | -2.82908600 | C                     | 2.56305300  | 2.57925500  | 0.87624200  |
| H  | 3.79586000  | 1.17512300  | -1.61779700 | C                     | 2.86414300  | 2.12565300  | -0.47354000 |
| H  | 2.94474100  | -2.32889900 | -2.60163400 | C                     | 1.61523400  | 2.20923500  | -2.76975400 |
| H  | 3.68020300  | -2.53011600 | -1.00716900 | C                     | -0.47909900 | 3.77226600  | -1.00951400 |
| H  | 2.77012600  | -4.76907400 | -0.84315000 | C                     | 0.63329200  | 3.91098200  | 2.02527900  |
| H  | 2.13725800  | -4.60811200 | -2.49045100 | C                     | 3.50128400  | 2.56207700  | 2.03097200  |
| Br | -1.73148400 | -3.28194200 | 0.10602600  | C                     | 4.12542400  | 1.45023400  | -0.88828100 |
| C  | 1.16697100  | -2.11721700 | 5.05696600  | C                     | 1.62149400  | -3.04614200 | -1.30609000 |
| C  | 2.20447900  | -1.67320300 | 4.20057700  | C                     | 0.40681900  | -3.50877400 | -2.12980600 |
| C  | 1.89523400  | -0.94239900 | 3.04918700  | C                     | -0.53087600 | -2.33441100 | -1.93576900 |
| C  | 0.54788300  | -0.67363500 | 2.78725500  | N                     | -0.08175800 | -1.33737200 | -1.22343400 |
| C  | -0.44275900 | -1.13108100 | 3.65495100  | C                     | 1.19355300  | -1.67655500 | -0.81852300 |
| C  | -0.17915300 | -1.85834600 | 4.80586700  | O                     | 1.89330900  | -0.91503400 | -0.13129900 |
| N  | -0.09674400 | 0.02770700  | 1.76122000  | O                     | -1.70797600 | -2.42535200 | -2.49079100 |
| C  | -1.38931300 | -0.03969800 | 2.01966600  | H                     | 0.58197400  | 1.98032600  | -3.04594000 |
| O  | -1.65979700 | -0.72539800 | 3.15462700  | H                     | 2.25868700  | 1.39318000  | -3.10739700 |
| C  | -2.49766500 | 0.48700000  | 1.22351200  | H                     | 1.90893100  | 3.11740000  | -3.31373900 |
| C  | -2.33551200 | 0.51317200  | -0.17679000 | H                     | -0.21462500 | 4.69443700  | -1.54705300 |
| C  | -3.33923200 | 0.99875200  | -1.00823000 | H                     | -1.17971300 | 4.03627300  | -0.21554300 |
| C  | -4.52672000 | 1.46352300  | -0.43926500 | H                     | -0.97386800 | 3.11394500  | -1.72935000 |
|    |             |             |             | H                     | 0.77379400  | 3.33330000  | 2.94324900  |

|    |             |             |             |
|----|-------------|-------------|-------------|
| H  | -0.43476800 | 4.07673200  | 1.87274100  |
| H  | 1.10847700  | 4.88974500  | 2.17488100  |
| H  | 4.23615800  | 1.75758600  | 1.95662300  |
| H  | 2.97577100  | 2.48689600  | 2.98578700  |
| H  | 4.05187800  | 3.51464600  | 2.03117500  |
| H  | 4.90219400  | 2.21370800  | -1.03269400 |
| H  | 4.00542100  | 0.90793300  | -1.82801400 |
| H  | 4.48418700  | 0.75753500  | -0.12209800 |
| H  | 2.54022300  | -2.96290800 | -1.89417100 |
| H  | 1.83047700  | -3.69608300 | -0.45045700 |
| H  | -0.06177000 | -4.42450100 | -1.75852200 |
| H  | 0.62030800  | -3.64494400 | -3.19434900 |
| Br | -2.97509800 | -0.98232200 | -2.10950800 |
| C  | 1.83946800  | -1.82720300 | 5.30532600  |
| C  | 2.76420800  | -1.29820600 | 4.37157100  |
| C  | 2.30453400  | -0.61011700 | 3.24453400  |
| C  | 0.92267700  | -0.46488500 | 3.08017100  |
| C  | 0.04951800  | -1.01853500 | 4.01446200  |
| C  | 0.46076000  | -1.70464500 | 5.14723100  |
| N  | 0.14250000  | 0.12885300  | 2.07594200  |
| C  | -1.11547700 | -0.09742800 | 2.41458100  |
| O  | -1.23167300 | -0.77573800 | 3.58132600  |
| C  | -2.34232600 | 0.26607800  | 1.70639400  |
| C  | -2.29100900 | 1.40211100  | 0.88272800  |
| C  | -3.39233900 | 1.80556800  | 0.13662200  |
| C  | -4.57633000 | 1.06475000  | 0.21751100  |
| C  | -4.63777100 | -0.05674600 | 1.04807700  |
| C  | -3.54342600 | -0.48721100 | 1.80927000  |
| C  | 4.24459900  | -1.48772700 | 4.60577200  |
| H  | 2.22181600  | -2.35821000 | 6.17287600  |
| H  | 3.00105800  | -0.21953600 | 2.51201500  |
| H  | -0.24520700 | -2.12336200 | 5.85612600  |
| H  | -1.37283300 | 1.97562300  | 0.85532500  |
| H  | -3.33489800 | 2.69270400  | -0.48606500 |
| H  | -5.56165000 | -0.62494200 | 1.10442400  |
| H  | 4.48973500  | -2.54668400 | 4.75059400  |
| H  | 4.57393000  | -0.95677600 | 5.50787900  |
| H  | 4.83479900  | -1.11592400 | 3.76251300  |
| C  | -3.69995100 | -1.72870500 | 2.65596300  |
| H  | -2.88877600 | -2.44552400 | 2.49021500  |
| H  | -3.70737400 | -1.49283900 | 3.72557700  |
| H  | -4.64451600 | -2.22521500 | 2.41577700  |
| H  | -5.45318800 | 1.36641000  | -0.34881600 |

### TSLM -1581.450042

|    |             |             |             |
|----|-------------|-------------|-------------|
| Rh | 1.16039300  | 0.79199400  | 0.17526500  |
| C  | 1.86276700  | 2.16050700  | -1.37970900 |
| C  | 0.83652400  | 2.84469800  | -0.61383200 |
| C  | 1.30439400  | 2.96838900  | 0.74483700  |
| C  | 2.60401800  | 2.37073200  | 0.83029600  |
| C  | 2.95251500  | 1.87278700  | -0.49176400 |
| C  | 1.81535100  | 1.91050800  | -2.85220600 |
| C  | -0.35859400 | 3.51150900  | -1.20797800 |
| C  | 0.59535900  | 3.66572100  | 1.85828100  |
| C  | 3.51742000  | 2.41498700  | 2.01132200  |
| C  | 4.24607300  | 1.22757700  | -0.85792600 |
| C  | 1.31090900  | -3.04203400 | -1.39824800 |
| C  | 0.33917200  | -2.75450300 | -2.55425200 |
| C  | -0.10380300 | -1.29441900 | -2.34841600 |
| N  | 0.46437200  | -0.81524200 | -1.17562400 |
| C  | 1.33655500  | -1.71336500 | -0.68377400 |
| O  | 2.08334400  | -1.35219100 | 0.26114700  |
| O  | -0.82131900 | -0.67743600 | -3.12432000 |
| H  | 0.81051200  | 1.63390000  | -3.18030900 |
| H  | 2.50737700  | 1.11975400  | -3.15085800 |
| H  | 2.10571400  | 2.82846200  | -3.38124200 |
| H  | -0.04221700 | 4.48590400  | -1.60725300 |
| H  | -1.14348400 | 3.70577700  | -0.47375100 |
| H  | -0.77288800 | 2.93777400  | -2.03902300 |
| H  | 0.85766000  | 3.24446800  | 2.83200700  |
| H  | -0.49005100 | 3.63382300  | 1.73872000  |
| H  | 0.89550400  | 4.72262600  | 1.86227200  |
| H  | 4.23070000  | 1.58754600  | 2.01145700  |
| H  | 2.96781800  | 2.40607500  | 2.95522300  |
| H  | 4.09611000  | 3.34865800  | 1.97244700  |
| H  | 4.98238400  | 2.01312900  | -1.07831000 |
| H  | 4.15111600  | 0.59985600  | -1.74669000 |
| H  | 4.64492100  | 0.62171300  | -0.04025100 |
| H  | 2.31912100  | -3.31735400 | -1.72282000 |
| H  | 0.95907300  | -3.82396900 | -0.71638700 |
| H  | -0.54842300 | -3.39465600 | -2.54434800 |
| H  | 0.80271400  | -2.85068300 | -3.54059200 |
| Br | -2.98640000 | 0.78449100  | -1.81973500 |
| C  | 1.81945500  | -1.40275900 | 5.54034300  |
| C  | 2.73177500  | -1.07407700 | 4.50569400  |
| C  | 2.26092300  | -0.60420300 | 3.27793100  |
| C  | 0.87651100  | -0.47306500 | 3.10924300  |
| C  | 0.01836700  | -0.82862100 | 4.14947200  |

|   |             |             |             |   |             |             |             |
|---|-------------|-------------|-------------|---|-------------|-------------|-------------|
| C | 0.44099200  | -1.29282500 | 5.38669200  | O | -2.08606000 | -2.37973600 | 1.12917300  |
| N | 0.08391000  | -0.04997300 | 2.02525100  | H | -0.52829900 | -3.79704200 | -0.73683700 |
| C | -1.15577300 | -0.18540600 | 2.43886700  | H | 0.99982800  | -4.42245400 | -0.09071900 |
| O | -1.26919000 | -0.64137000 | 3.70825900  | H | 0.57142500  | -4.70991400 | -1.78488000 |
| C | -2.41319000 | 0.09504600  | 1.73292500  | H | -0.74420600 | -2.30192600 | -3.69508500 |
| C | -2.46032200 | 1.16817800  | 0.88392100  | H | -1.11335600 | -0.69997700 | -3.04878000 |
| C | -3.64561900 | 1.46302500  | 0.07386700  | H | -1.47899000 | -2.15724800 | -2.09343700 |
| C | -4.83523700 | 0.65012600  | 0.33084700  | H | 2.13868500  | 1.32635500  | -3.08165000 |
| C | -4.78508400 | -0.39144700 | 1.21288600  | H | 0.44969300  | 0.85848500  | -3.39443200 |
| C | -3.59174000 | -0.72396200 | 1.90928200  | H | 1.74826100  | 0.21847700  | -4.40323600 |
| C | 4.21287300  | -1.24954400 | 4.74411500  | H | 4.73000000  | -0.53869900 | -0.95720400 |
| H | 2.21400500  | -1.76468200 | 6.48583900  | H | 4.07286600  | 0.66103200  | -2.09176900 |
| H | 2.94699300  | -0.37205300 | 2.47443400  | H | 4.76299500  | -0.85331900 | -2.69445200 |
| H | -0.25603200 | -1.55576500 | 6.17453400  | H | 4.20841400  | -3.69480200 | -1.08571800 |
| H | -1.58834700 | 1.80202700  | 0.77508500  | H | 3.11555000  | -3.85367100 | 0.29957200  |
| H | -3.83711100 | 2.52324100  | -0.09938900 | H | 4.24318700  | -2.48426300 | 0.20079500  |
| H | -5.66334100 | -1.00640600 | 1.37670200  | H | 1.14819100  | -2.63336300 | 4.09113200  |
| H | 4.45241300  | -2.29345300 | 4.98141800  | H | 0.38272100  | -1.07466100 | 4.40878700  |
| H | 4.55283900  | -0.64193300 | 5.59180400  | H | -1.75591500 | -2.05219000 | 3.87218500  |
| H | 4.79665800  | -0.96181400 | 3.86447500  | H | -0.97150500 | -3.56698100 | 3.42322300  |
| C | -3.61114500 | -1.92424600 | 2.78386500  | C | 3.27343600  | 4.40260800  | 1.16358300  |
| H | -2.70512700 | -2.52745900 | 2.66347800  | C | 3.84335600  | 3.10588300  | 1.23815300  |
| H | -3.63547800 | -1.60818800 | 3.83730400  | C | 3.08048800  | 1.98516800  | 0.90318800  |
| H | -4.49567000 | -2.53286300 | 2.58967300  | C | 1.75659500  | 2.19455700  | 0.50097100  |
| H | -5.74621100 | 0.88136700  | -0.21228800 | C | 1.23445000  | 3.48658600  | 0.44786200  |

### M -1581.464525

|    |             |             |             |   |             |            |             |
|----|-------------|-------------|-------------|---|-------------|------------|-------------|
| Rh | 1.22223400  | -0.83228700 | -0.28238600 | C | 1.95713800  | 4.62646600 | 0.76927300  |
| C  | 1.21102500  | -2.72141300 | -1.39486600 | N | 0.74018200  | 1.31035200 | 0.10141800  |
| C  | 0.61148400  | -1.66382500 | -2.19207200 | C | -0.30009300 | 2.06883400 | -0.14716000 |
| C  | 1.64597900  | -0.68759400 | -2.49211100 | O | -0.07582600 | 3.39003900 | 0.03448200  |
| C  | 2.83800700  | -1.08500800 | -1.82515600 | C | -1.67282400 | 1.67058400 | -0.50708100 |
| C  | 2.56961300  | -2.35294000 | -1.14529900 | C | -2.26121500 | 0.66621600 | 0.21079100  |
| C  | 0.52406400  | -3.97740600 | -0.96767700 | C | -4.35013300 | 0.90733900 | -1.14311300 |
| C  | -0.76098800 | -1.69750500 | -2.77718600 | C | -3.75431200 | 1.92311200 | -1.83029400 |
| C  | 1.48254700  | 0.50344700  | -3.37584700 | C | -2.42336700 | 2.34255900 | -1.54093100 |
| C  | 4.16774400  | -0.40764600 | -1.88536100 | C | 5.27664700  | 2.95219300 | 1.68760200  |
| C  | 3.58147000  | -3.13491900 | -0.37763400 | H | 3.89070600  | 5.25591300 | 1.43114900  |
| C  | 0.44945600  | -1.89520800 | 3.68574800  | H | 3.49266400  | 0.98611600 | 0.97578400  |
| C  | -0.92472600 | -2.47963000 | 3.30337100  | H | 1.52527800  | 5.61979700 | 0.71978900  |
| C  | -1.09995400 | -2.13597100 | 1.81700300  | H | -1.71777500 | 0.18147900 | 1.01000500  |
| N  | 0.03206900  | -1.47881400 | 1.38080300  | H | -4.28871700 | 2.43199400 | -2.62495300 |
| C  | 0.95561600  | -1.36832500 | 2.36007500  | H | 5.42096100  | 3.36370800 | 2.69394300  |
| O  | 2.07388800  | -0.88872000 | 2.07452400  | H | 5.96021600  | 3.49072500 | 1.01969900  |
|    |             |             |             | H | 5.57827500  | 1.90072600 | 1.70584200  |
|    |             |             |             | C | -3.63072300 | 0.21024100 | -0.06646700 |

|    |             |             |             |
|----|-------------|-------------|-------------|
| H  | -3.68611800 | -0.88286400 | -0.12353500 |
| Br | -4.70266400 | 0.59518800  | 1.67853000  |
| C  | -1.85655500 | 3.47581700  | -2.30817100 |
| H  | -1.95485600 | 4.39037200  | -1.69938300 |
| H  | -0.78822900 | 3.35425500  | -2.50933700 |
| H  | -2.40586500 | 3.63897100  | -3.23763300 |
| H  | -5.35899900 | 0.58677800  | -1.38419500 |

**TSMJ -1581.448892**

|    |             |             |             |
|----|-------------|-------------|-------------|
| Rh | 1.23805700  | -0.86374800 | -0.26898100 |
| C  | 1.19428800  | -2.77634000 | -1.35029100 |
| C  | 0.60960200  | -1.72127200 | -2.16231300 |
| C  | 1.65898900  | -0.76798300 | -2.47915000 |
| C  | 2.84483100  | -1.17185800 | -1.80221000 |
| C  | 2.55818700  | -2.42446800 | -1.10316700 |
| C  | 0.49232400  | -4.01776700 | -0.90727500 |
| C  | -0.76730700 | -1.73486500 | -2.74005400 |
| C  | 1.51577100  | 0.40983400  | -3.38364100 |
| C  | 4.18216000  | -0.51024100 | -1.86995600 |
| C  | 3.55776300  | -3.21159700 | -0.32454100 |
| C  | 0.51038100  | -1.82851100 | 3.73046500  |
| C  | -0.88347700 | -2.39730500 | 3.40092800  |
| C  | -1.09479400 | -2.08229700 | 1.91383200  |
| N  | 0.03912000  | -1.46352600 | 1.42534900  |
| C  | 0.98489300  | -1.33905700 | 2.38022900  |
| O  | 2.10120200  | -0.87945200 | 2.05507400  |
| O  | -2.10688800 | -2.31307600 | 1.26014700  |
| H  | -0.56211200 | -3.82880100 | -0.69354100 |
| H  | 0.95438800  | -4.45155500 | -0.01756400 |
| H  | 0.54439800  | -4.76432900 | -1.71156300 |
| H  | -0.76114100 | -2.32314500 | -3.66855100 |
| H  | -1.11155900 | -0.72950700 | -2.99304900 |
| H  | -1.48594900 | -2.20097000 | -2.06150300 |
| H  | 2.17125500  | 1.23444500  | -3.09298100 |
| H  | 0.48489700  | 0.76798400  | -3.42466800 |
| H  | 1.79715500  | 0.10585300  | -4.40142100 |
| H  | 4.74755200  | -0.64762500 | -0.94459200 |
| H  | 4.09803800  | 0.55950600  | -2.07595300 |
| H  | 4.76797700  | -0.96208900 | -2.68246600 |
| H  | 4.17555700  | -3.79185800 | -1.02405400 |
| H  | 3.08063600  | -3.91245800 | 0.36354600  |
| H  | 4.22943600  | -2.56279100 | 0.24438100  |
| H  | 1.20915400  | -2.56992600 | 4.12990000  |
| H  | 0.47872700  | -0.99241600 | 4.43768700  |

|    |             |             |             |
|----|-------------|-------------|-------------|
| H  | -1.69052900 | -1.94362300 | 3.98363300  |
| H  | -0.94484600 | -3.48104700 | 3.54518600  |
| C  | 3.23760300  | 4.41140800  | 1.06751400  |
| C  | 3.78075400  | 3.11282000  | 1.25582100  |
| C  | 3.02528700  | 1.98442600  | 0.93502500  |
| C  | 1.73292800  | 2.18615600  | 0.43338400  |
| C  | 1.23642100  | 3.48161200  | 0.27067700  |
| C  | 1.95457200  | 4.62891100  | 0.57412000  |
| N  | 0.73376600  | 1.29619800  | 0.01815700  |
| C  | -0.28027100 | 2.05210100  | -0.34777900 |
| O  | -0.04142800 | 3.37950500  | -0.22318700 |
| C  | -1.62488000 | 1.66305900  | -0.77856200 |
| C  | -2.19266800 | 0.50877700  | -0.16134400 |
| C  | -4.33373200 | 0.87449700  | -1.36979300 |
| C  | -3.74134100 | 1.95085400  | -1.97314000 |
| C  | -2.38387500 | 2.38132400  | -1.70229800 |
| C  | 5.17319700  | 2.96953800  | 1.82076700  |
| H  | 3.84991000  | 5.27106400  | 1.32572600  |
| H  | 3.41358900  | 0.98576800  | 1.09378300  |
| H  | 1.54351200  | 5.62302800  | 0.43858000  |
| H  | -1.55252300 | -0.20924300 | 0.33674800  |
| H  | -4.29768400 | 2.52122400  | -2.71076800 |
| H  | 5.22301500  | 3.35902900  | 2.84529300  |
| H  | 5.90213100  | 3.53437500  | 1.22730300  |
| H  | 5.48857500  | 1.92226500  | 1.84279000  |
| C  | -3.56577400 | 0.09583200  | -0.46414300 |
| H  | -3.86688000 | -0.90601100 | -0.17354800 |
| Br | -3.51697800 | 1.03988500  | 1.69357200  |
| C  | -1.89034700 | 3.57523700  | -2.45375800 |
| H  | -2.14865300 | 4.48932600  | -1.89885500 |
| H  | -0.80811200 | 3.57120500  | -2.59343700 |
| H  | -2.38530900 | 3.63903100  | -3.42711500 |
| H  | -5.35139000 | 0.58323000  | -1.60270400 |

**TSMN -1581.426631**

|    |             |             |             |
|----|-------------|-------------|-------------|
| Rh | 1.07192200  | -0.88682800 | -0.66025600 |
| C  | 0.87797700  | -2.62332000 | -2.01609700 |
| C  | 0.79461600  | -1.39399900 | -2.80798500 |
| C  | 2.02198900  | -0.68796400 | -2.65880500 |
| C  | 2.86125000  | -1.44652200 | -1.73761300 |
| C  | 2.15438300  | -2.66600500 | -1.38257700 |
| C  | -0.19060500 | -3.65863800 | -1.93853700 |
| C  | -0.35101400 | -1.02376100 | -3.68910700 |
| C  | 2.41397100  | 0.57824000  | -3.34236400 |

|   |             |             |             |          |                     |             |             |
|---|-------------|-------------|-------------|----------|---------------------|-------------|-------------|
| C | 4.26164200  | -1.11325900 | -1.35886600 | H        | 3.55007600          | 1.06146000  | 0.62318700  |
| C | 2.68811400  | -3.75769900 | -0.51610300 | H        | 1.10713500          | 5.45029400  | 1.06039000  |
| C | 0.93147000  | -1.28429100 | 3.79332300  | H        | -1.16389700         | -0.41230600 | 1.00425100  |
| C | -0.33276900 | -0.78619500 | 4.50710500  | H        | -4.67138100         | 1.94500500  | -2.17272700 |
| C | -1.25110200 | -0.32803800 | 3.37456800  | H        | 5.30034600          | 3.41327300  | 2.59447600  |
| N | -0.61746200 | -0.57569100 | 2.14542000  | H        | 5.74879400          | 3.76029400  | 0.92476700  |
| C | 0.61029400  | -1.07052000 | 2.32679400  | H        | 5.54786800          | 2.08011600  | 1.45254200  |
| O | 1.43777800  | -1.33121600 | 1.40830100  | C        | -3.07833000         | -0.71642900 | -0.67326000 |
| O | -2.34798100 | 0.18266300  | 3.47956700  | H        | -2.71302400         | -1.47809700 | -1.38622500 |
| H | -1.18638900 | -3.22273000 | -2.05886800 | Br       | -3.94545000         | -1.91532800 | 0.76752900  |
| H | -0.15390500 | -4.21365200 | -0.99809100 | C        | -2.56981800         | 3.47372900  | -1.60354400 |
| H | -0.04906000 | -4.37847600 | -2.75711600 | H        | -2.65573700         | 4.06045500  | -0.67731500 |
| H | -0.20998700 | -1.48795300 | -4.67500900 | H        | -1.58904600         | 3.71063300  | -2.02858200 |
| H | -0.41957200 | 0.05660000  | -3.83802800 | H        | -3.35832400         | 3.79894200  | -2.28463600 |
| H | -1.29989600 | -1.39197000 | -3.29000700 | H        | -5.03031200         | -0.45155300 | -1.69120600 |
| H | 3.07589900  | 1.18745000  | -2.72211400 |          |                     |             |             |
| H | 1.54283700  | 1.17392300  | -3.62478300 | <b>N</b> | <b>-1581.478222</b> |             |             |
| H | 2.96116300  | 0.32842900  | -4.26189900 | Rh       | -0.21382400         | -0.98722700 | 0.28466500  |
| H | 4.50933000  | -1.47781400 | -0.35878000 | C        | -1.27743000         | -2.47428500 | 1.60099100  |
| H | 4.45367500  | -0.03923600 | -1.40907000 | C        | -1.50497700         | -2.84550200 | 0.24378800  |
| H | 4.94184700  | -1.60710200 | -2.06831700 | C        | -0.20951200         | -3.07718900 | -0.36197100 |
| H | 3.29200600  | -4.43891400 | -1.13043400 | C        | 0.79438600          | -3.07086500 | 0.71103200  |
| H | 1.88489900  | -4.34002000 | -0.05875900 | C        | 0.15369200          | -2.67317700 | 1.89302700  |
| H | 3.33133600  | -3.36519500 | 0.27531800  | C        | -2.30803000         | -2.15696800 | 2.63561800  |
| H | 1.14653200  | -2.34400800 | 3.96579200  | C        | -2.82115400         | -3.06554100 | -0.42631500 |
| H | 1.83395400  | -0.72054200 | 4.05073900  | C        | 0.03376700          | -3.56212400 | -1.75497000 |
| H | -0.14564100 | 0.05268800  | 5.18391800  | C        | 2.21989100          | -3.47879000 | 0.52870100  |
| H | -0.83942400 | -1.56657600 | 5.08345500  | C        | 0.75587300          | -2.47157800 | 3.24409000  |
| C | 2.98582100  | 4.37739100  | 1.29046300  | C        | 0.50063400          | 2.30983700  | 3.50982500  |
| C | 3.68857500  | 3.15106100  | 1.17551000  | C        | 1.02462200          | 3.72667300  | 3.21991000  |
| C | 3.03013100  | 2.00949300  | 0.71142600  | C        | 1.16847600          | 3.79764000  | 1.70892100  |
| C | 1.67769600  | 2.12935000  | 0.37553600  | N        | 0.78815800          | 2.53802600  | 1.19969000  |
| C | 1.02147300  | 3.35352500  | 0.50946700  | C        | 0.40338800          | 1.64793400  | 2.15102400  |
| C | 1.63839000  | 4.51006700  | 0.96251600  | O        | 0.02354000          | 0.48552600  | 1.95829800  |
| N | 0.74053300  | 1.21069000  | -0.10842000 | O        | 1.53156100          | 4.71820600  | 1.01427700  |
| C | -0.39023300 | 1.87015500  | -0.22379500 | H        | -3.23283300         | -1.78465200 | 2.18867400  |
| O | -0.29091600 | 3.17136700  | 0.12493700  | H        | -1.93997500         | -1.41217900 | 3.34691800  |
| C | -1.68246300 | 1.28261100  | -0.60638700 | H        | -2.55104800         | -3.06512700 | 3.20438300  |
| C | -1.88396500 | -0.02571100 | -0.17462000 | H        | -3.03808300         | -4.14256600 | -0.41033600 |
| C | -4.13159400 | 0.05781600  | -1.35689900 | H        | -2.81226400         | -2.75552600 | -1.47474000 |
| C | -3.91942800 | 1.37031800  | -1.64225500 | H        | -3.64198100         | -2.56592700 | 0.09428600  |
| C | -2.70195700 | 2.02628000  | -1.28021900 | H        | 1.02022500          | -3.25904500 | -2.11687600 |
| C | 5.14880300  | 3.09350400  | 1.55645400  | H        | -0.72353600         | -3.18943000 | -2.44922900 |
| H | 3.52174100  | 5.24968800  | 1.65456400  | H        | -0.00331200         | -4.66022100 | -1.77444800 |



|                          |             |             |             |   |             |             |             |
|--------------------------|-------------|-------------|-------------|---|-------------|-------------|-------------|
| H                        | 2.84947100  | -3.16087000 | 1.36210500  | C | -1.26086100 | -2.40595300 | 1.61460800  |
| H                        | 2.64172100  | -3.08830300 | -0.40126100 | C | -1.60647000 | -2.71337000 | 0.26750600  |
| H                        | 2.27062600  | -4.57490600 | 0.47113600  | C | -0.36602800 | -2.93655400 | -0.45550200 |
| H                        | 0.40706500  | -3.25649200 | 3.92809200  | C | 0.72305800  | -2.97064600 | 0.52878400  |
| H                        | 0.44728400  | -1.50988900 | 3.66696700  | C | 0.18858600  | -2.61194400 | 1.77766000  |
| H                        | 1.84753300  | -2.50580800 | 3.21505500  | C | -2.19265900 | -2.10197800 | 2.74106600  |
| H                        | -0.49122000 | 2.30196400  | 3.97274900  | C | -2.98496600 | -2.88158100 | -0.28416000 |
| H                        | 1.16598600  | 1.71946200  | 4.14714600  | C | -0.23836900 | -3.39330000 | -1.87258300 |
| H                        | 1.99898800  | 3.92466800  | 3.67688000  | C | 2.13178000  | -3.34735600 | 0.20755300  |
| H                        | 0.34117100  | 4.51476300  | 3.54910700  | C | 0.90545000  | -2.48271400 | 3.08145500  |
| C                        | 5.23231200  | 0.73515500  | -1.87267000 | C | 0.31310500  | 2.26126100  | 3.73770100  |
| C                        | 5.03897200  | 0.03136000  | -0.65777000 | C | 1.12916700  | 3.56000000  | 3.62481300  |
| C                        | 3.74676300  | -0.29800200 | -0.23867900 | C | 1.68994400  | 3.55632700  | 2.21278600  |
| C                        | 2.67890100  | 0.08931800  | -1.05339200 | N | 1.20429600  | 2.39441300  | 1.57940100  |
| C                        | 2.91266800  | 0.79057900  | -2.24065000 | C | 0.42214900  | 1.61250900  | 2.37195300  |
| C                        | 4.17726800  | 1.13361000  | -2.69179000 | O | -0.11860900 | 0.54892100  | 2.04677800  |
| N                        | 1.29463300  | -0.05229700 | -0.93768600 | O | 2.41465700  | 4.36017700  | 1.67295600  |
| C                        | 0.77493200  | 0.53658100  | -1.99194000 | H | -3.17546200 | -1.78353300 | 2.38528700  |
| O                        | 1.68691900  | 1.06825600  | -2.82494900 | H | -1.78440400 | -1.32378100 | 3.39258300  |
| C                        | -0.66848000 | 0.62714600  | -2.13101100 | H | -2.33249700 | -3.00374900 | 3.35279400  |
| C                        | -1.33663300 | 0.07307300  | -1.01500900 | H | -3.27716300 | -3.93385800 | -0.16332000 |
| C                        | -3.49505300 | 0.78047600  | -2.16957600 | H | -3.03627300 | -2.65099700 | -1.35122000 |
| C                        | -2.78307200 | 1.20528600  | -3.24099700 | H | -3.72187200 | -2.27630600 | 0.24928800  |
| C                        | -1.34771600 | 1.17881300  | -3.24106300 | H | 0.71280000  | -3.07712800 | -2.31021800 |
| C                        | 6.23781300  | -0.35275000 | 0.17657100  | H | -1.05408300 | -3.02093200 | -2.49696700 |
| H                        | 6.24705200  | 0.97909700  | -2.17474800 | H | -0.26760800 | -4.49133000 | -1.90516700 |
| H                        | 3.58014000  | -0.83345000 | 0.68987900  | H | 2.81613900  | -3.10650800 | 1.02348100  |
| H                        | 4.33431500  | 1.67954800  | -3.61555900 | H | 2.48395800  | -2.85892800 | -0.70538300 |
| H                        | 0.79342800  | 2.33586300  | 0.20438100  | H | 2.18057300  | -4.43116200 | 0.03518900  |
| H                        | -3.28840300 | 1.59432400  | -4.11827000 | H | 0.66128100  | -3.33856300 | 3.72491800  |
| H                        | 6.82528100  | 0.53120300  | 0.45296900  | H | 0.59529600  | -1.57773600 | 3.61280100  |
| H                        | 6.90739500  | -1.02251500 | -0.37701000 | H | 1.98967000  | -2.45866300 | 2.94950900  |
| H                        | 5.93717900  | -0.86165200 | 1.09738400  | H | -0.74383600 | 2.42901100  | 3.96645300  |
| C                        | -2.81416100 | 0.25518200  | -0.96629600 | H | 0.70602200  | 1.56794400  | 4.48815600  |
| H                        | -3.34654700 | -0.57481600 | -0.50682300 | H | 1.95716300  | 3.61474400  | 4.33751000  |
| Br                       | -3.13397800 | 1.77137000  | 0.45641300  | H | 0.52079400  | 4.45993200  | 3.75817100  |
| C                        | -0.62881100 | 1.72915000  | -4.42613200 | C | 5.18157300  | 0.77388600  | -1.88957900 |
| H                        | -0.02881200 | 2.60249300  | -4.13631700 | C | 4.97571700  | 0.19146700  | -0.61070700 |
| H                        | 0.07595600  | 0.99494700  | -4.83484200 | C | 3.68048600  | -0.08539800 | -0.16986500 |
| H                        | -1.32779100 | 2.02863100  | -5.20874300 | C | 2.62086500  | 0.22442000  | -1.03018100 |
| H                        | -4.57985200 | 0.82096400  | -2.15834200 | C | 2.86794300  | 0.80165400  | -2.28352900 |
|                          |             |             |             | C | 4.13772600  | 1.09601100  | -2.75369600 |
| <b>TSNK -1581.463926</b> |             |             |             | N | 1.23847200  | 0.10332300  | -0.90979100 |
| Rh                       | -0.28516000 | -0.88807800 | 0.27139000  | C | 0.73025700  | 0.57064000  | -2.03435700 |

|   |             |             |             |    |             |             |             |
|---|-------------|-------------|-------------|----|-------------|-------------|-------------|
| O | 1.65267500  | 1.01261100  | -2.90684800 | H  | 6.82809600  | -0.85226000 | -0.22913300 |
| C | -0.69743600 | 0.57753000  | -2.24714500 | H  | 5.86380500  | -0.53293700 | 1.22454600  |
| C | -1.41521500 | 0.21290100  | -1.02122400 | C  | -2.87946200 | 0.26702700  | -1.09980300 |
| C | -3.52966500 | 0.43285700  | -2.34644000 | H  | -3.45403800 | -0.03079700 | -0.23123600 |
| C | -2.77818100 | 0.64952500  | -3.47587600 | Br | -2.13340100 | 2.35790400  | -0.13520500 |
| C | -1.34073100 | 0.74441200  | -3.46286800 | C  | -0.62199700 | 0.99035900  | -4.75928900 |
| C | 6.16975400  | -0.12228800 | 0.25781800  | H  | -0.14366200 | 1.97742400  | -4.75627700 |
| H | 6.20035400  | 0.98018700  | -2.20524700 | H  | 0.16794300  | 0.25114100  | -4.92872200 |
| H | 3.50328400  | -0.52560500 | 0.80562400  | H  | -1.32066000 | 0.95167900  | -5.59786600 |
| H | 4.30523000  | 1.54757800  | -3.72524400 | H  | -4.61263400 | 0.39920500  | -2.39366000 |
| H | 1.44327700  | 2.17057500  | 0.61866200  |    |             |             |             |
| H | -3.27739500 | 0.76471000  | -4.43368100 |    |             |             |             |
| H | 6.76934500  | 0.77693300  | 0.44311600  |    |             |             |             |

## 6. NMR Spectra of products

### 2-(2-bromo-6-methylphenyl)-5-methylbenzo[d]oxazole (2a)

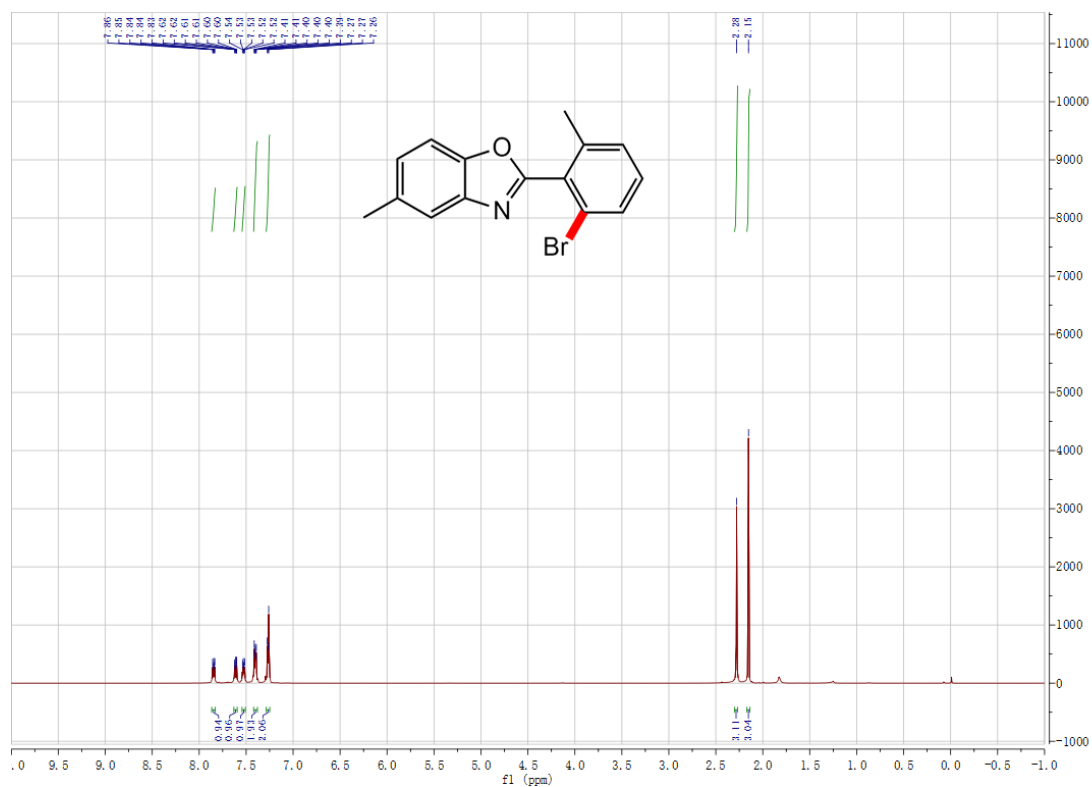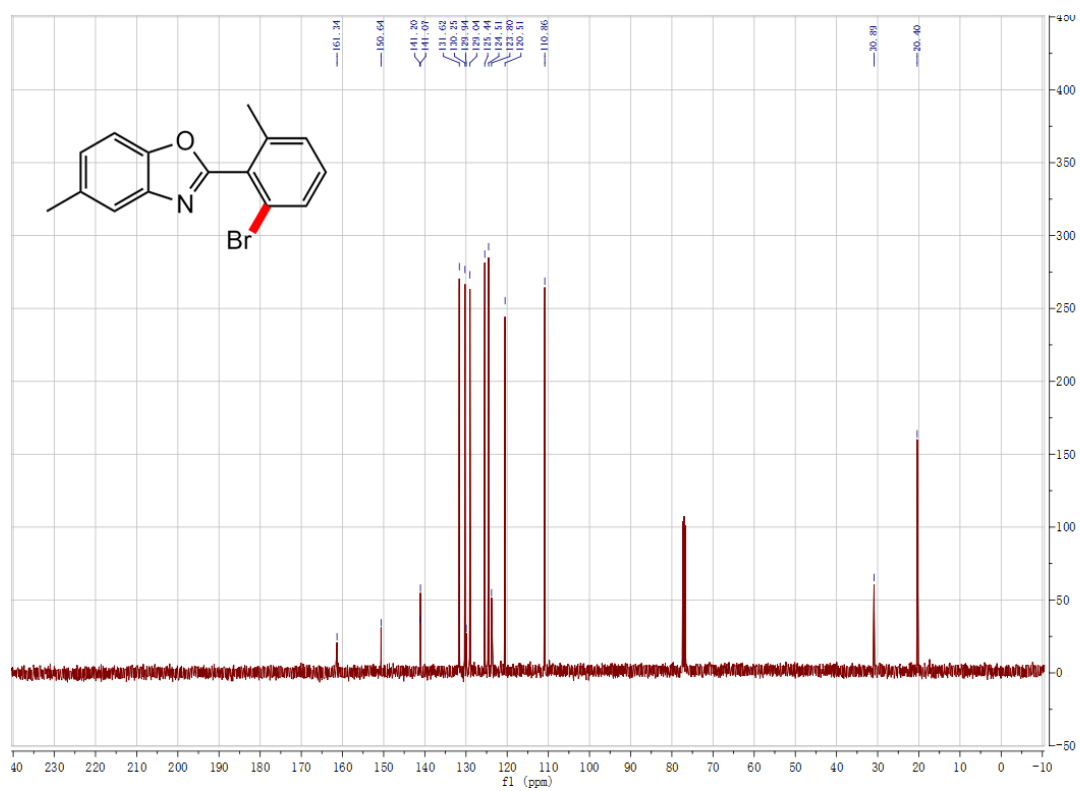

2-(2-bromo-6-fluorophenyl)-5-methylbenzo[d]oxazole (2b)

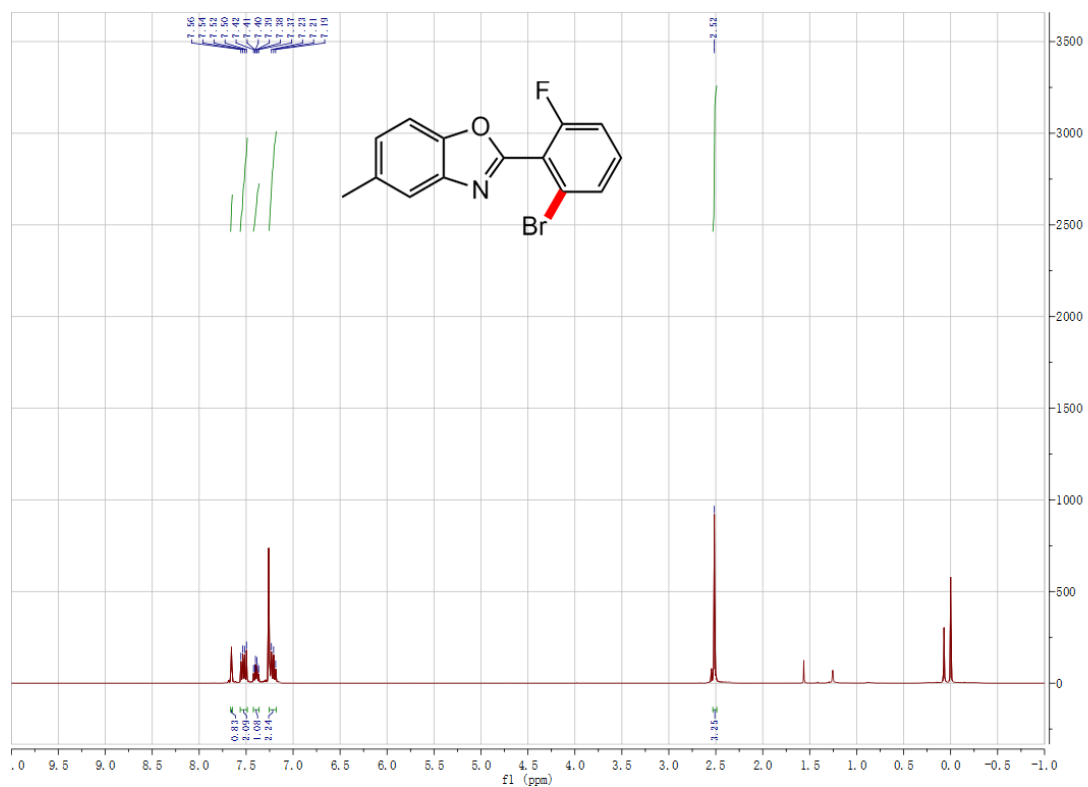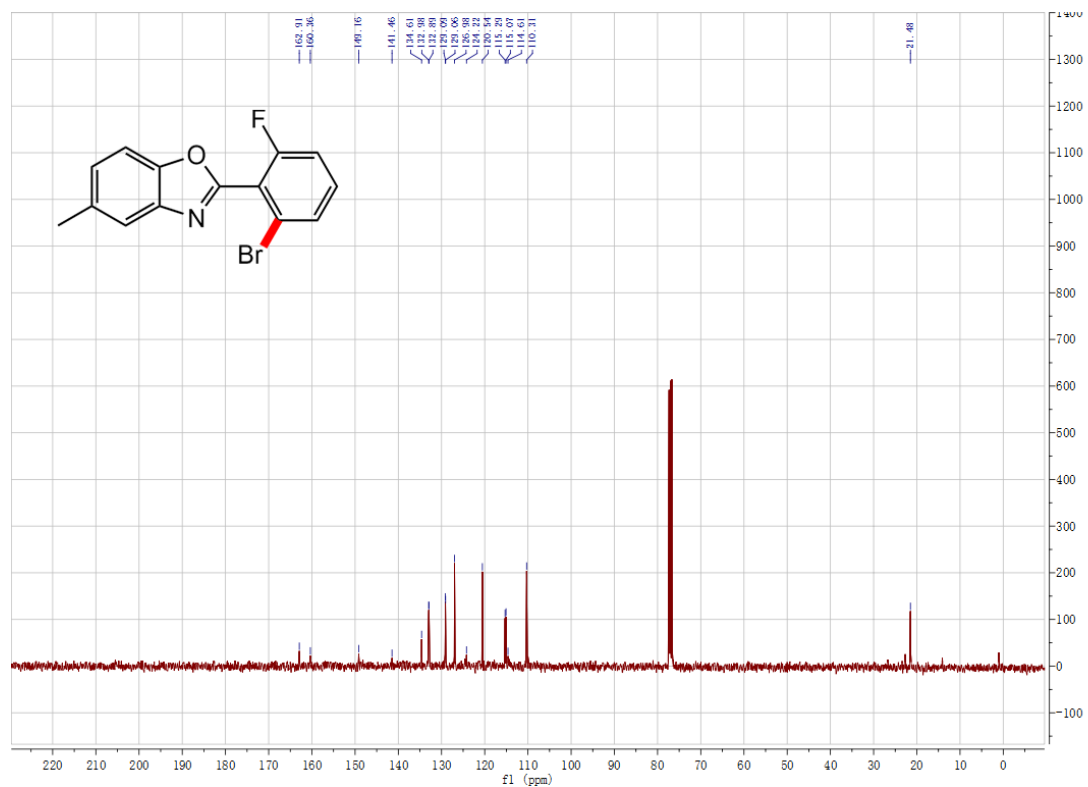

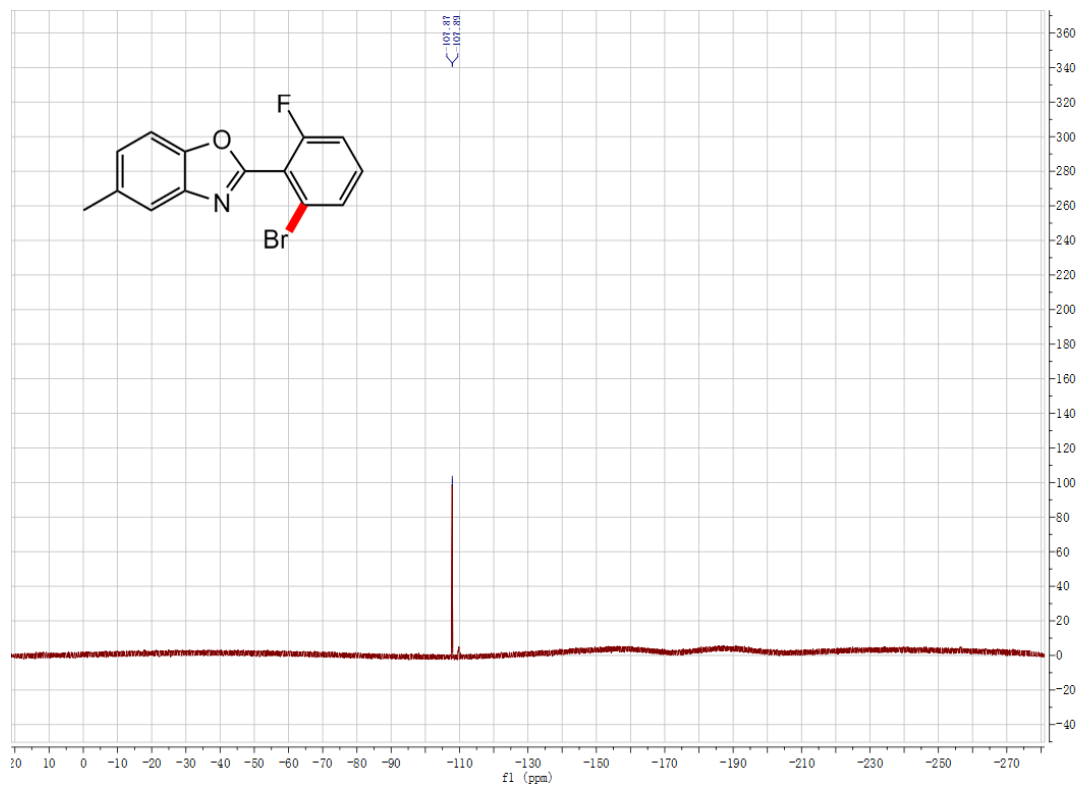

2-(2-bromo-6-chlorophenyl)-5-methylbenzo[d]oxazole (2c)

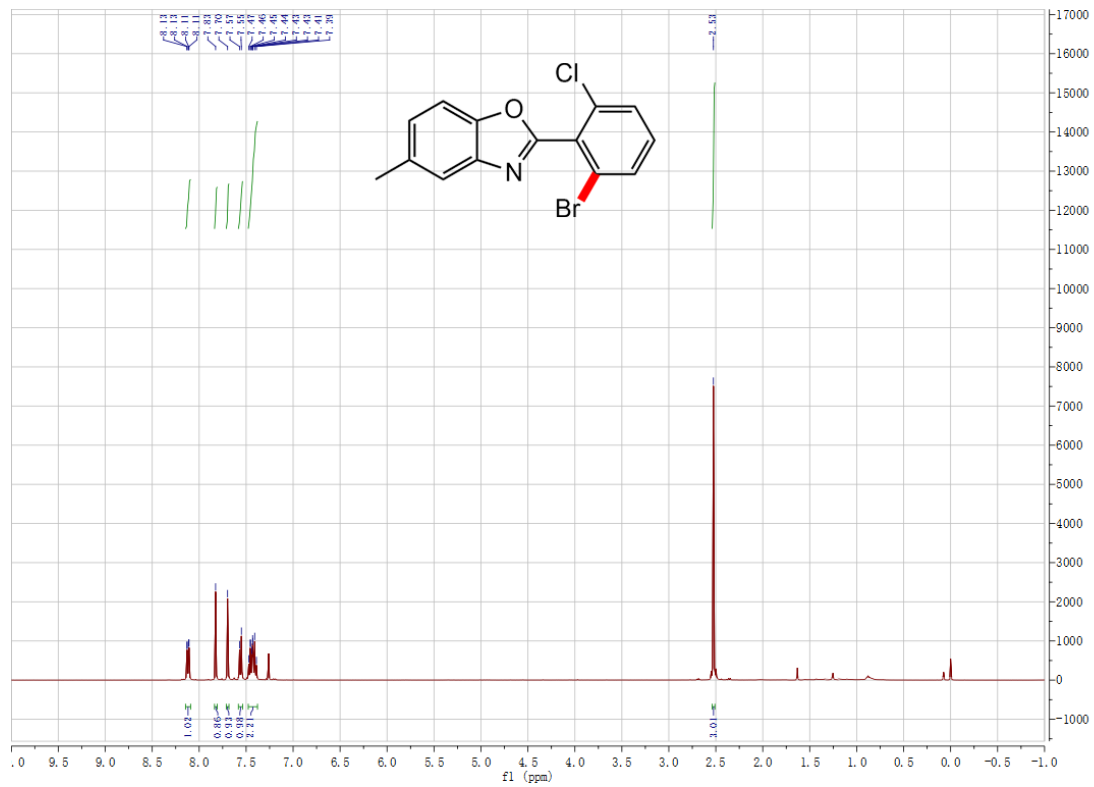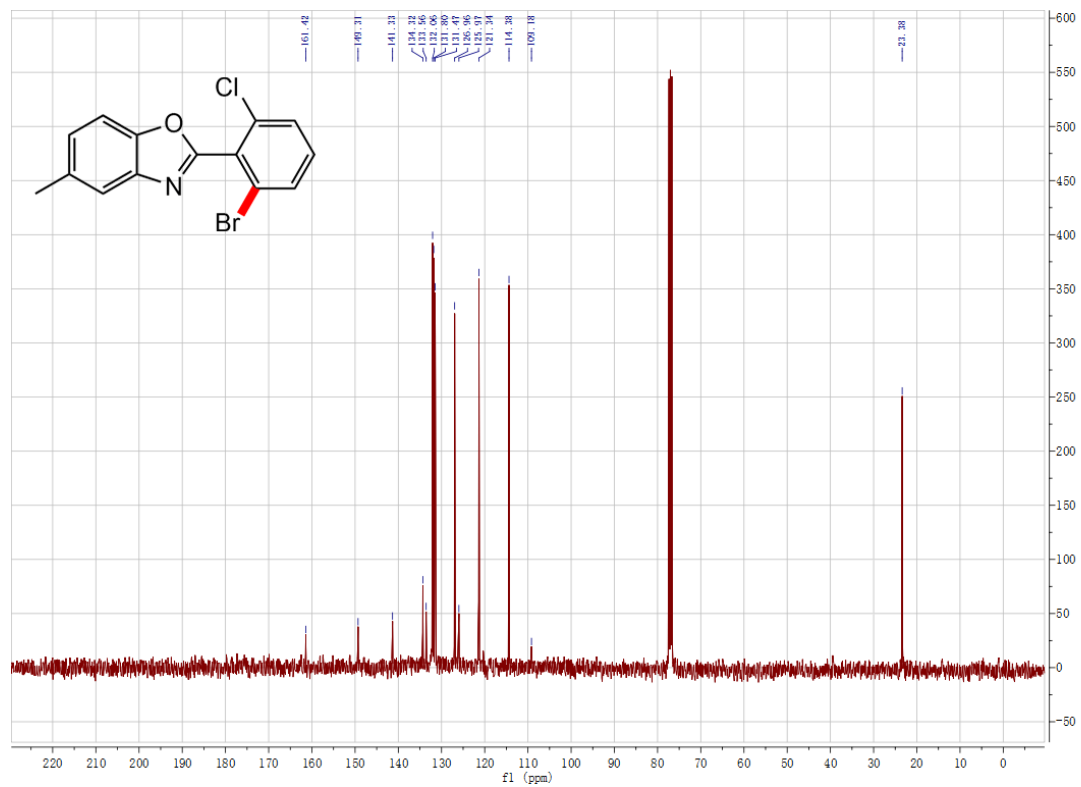

2-(2,6-dibromophenyl)-5-methylbenzo[d]oxazole (2m)

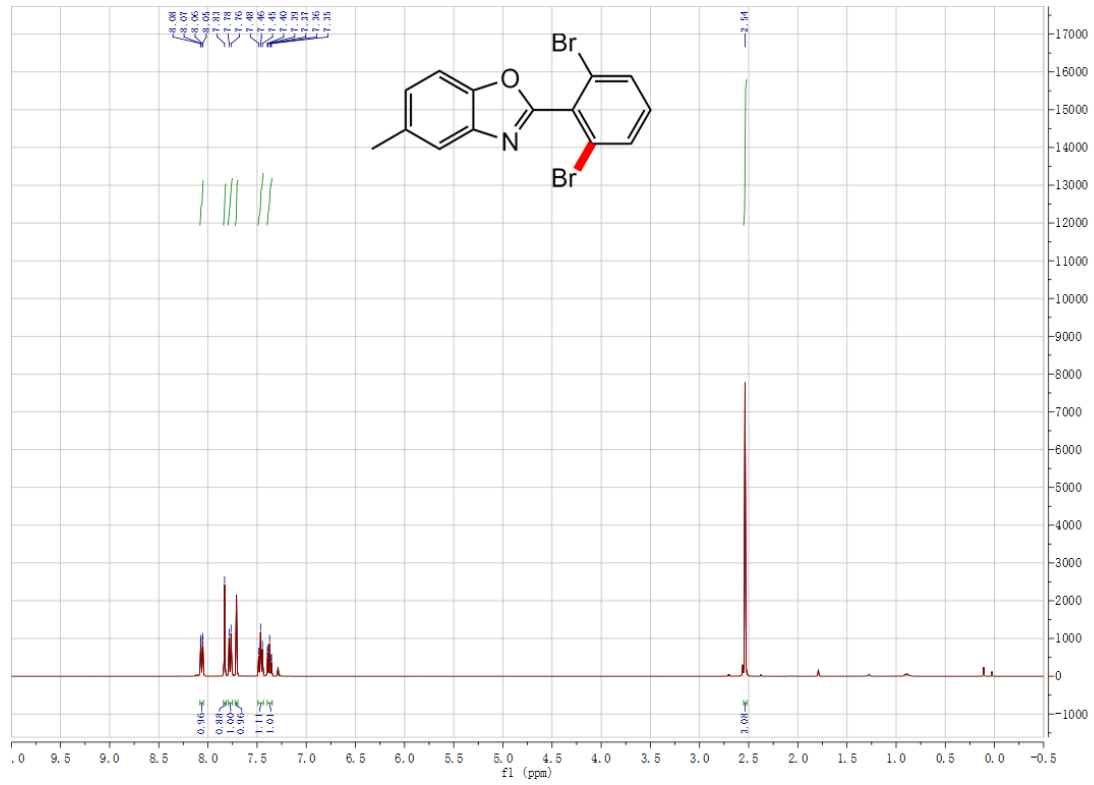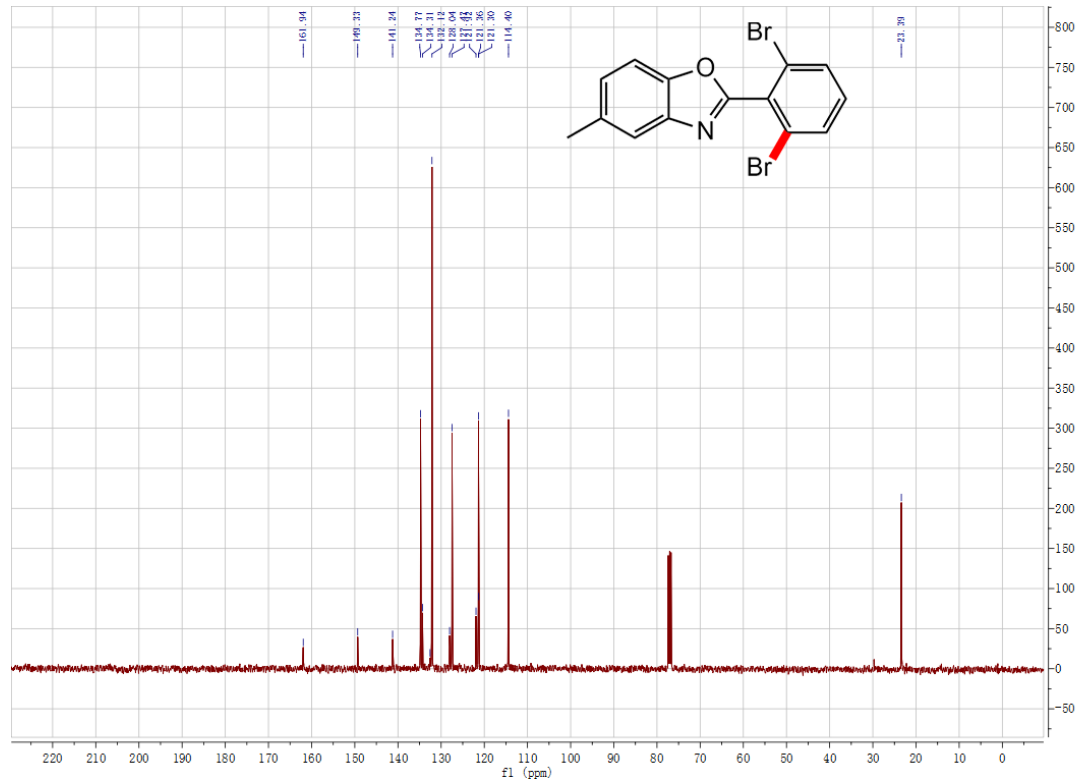

2-(2-bromo-6-methoxyphenyl)-5-methylbenzo[d]oxazole (2n)

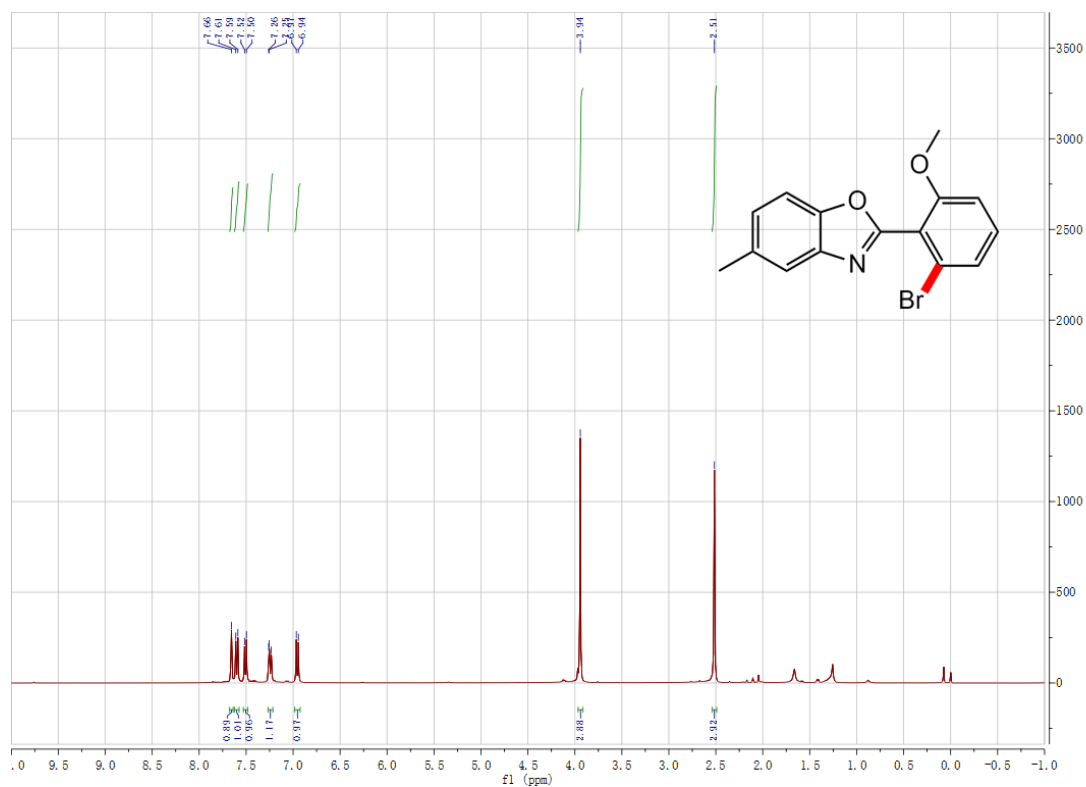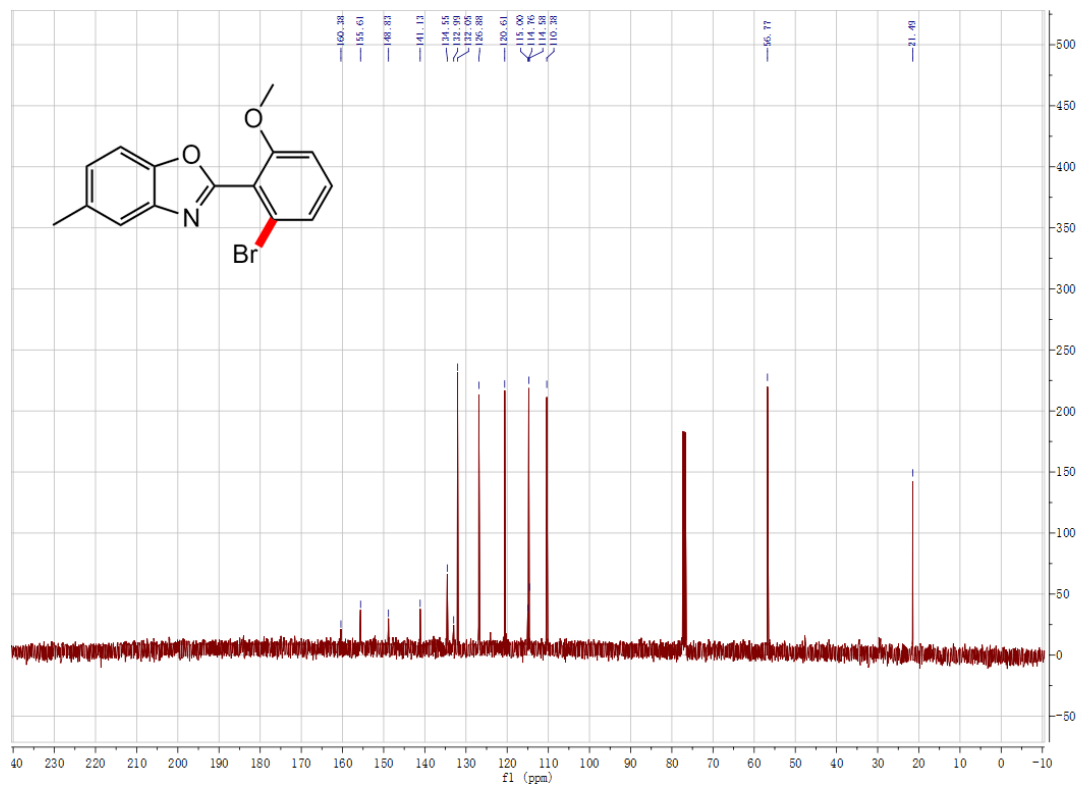



# 2-(2-bromo-6-methylphenyl)-5-chlorobenzo[d]oxazole (2o)

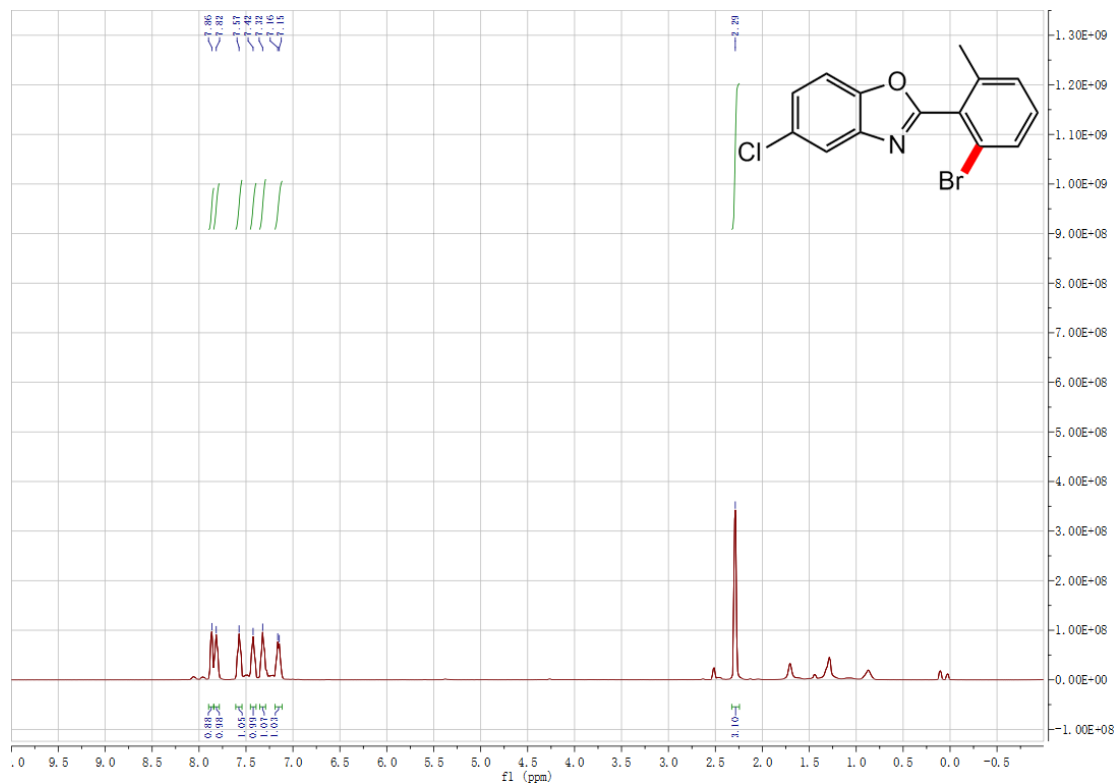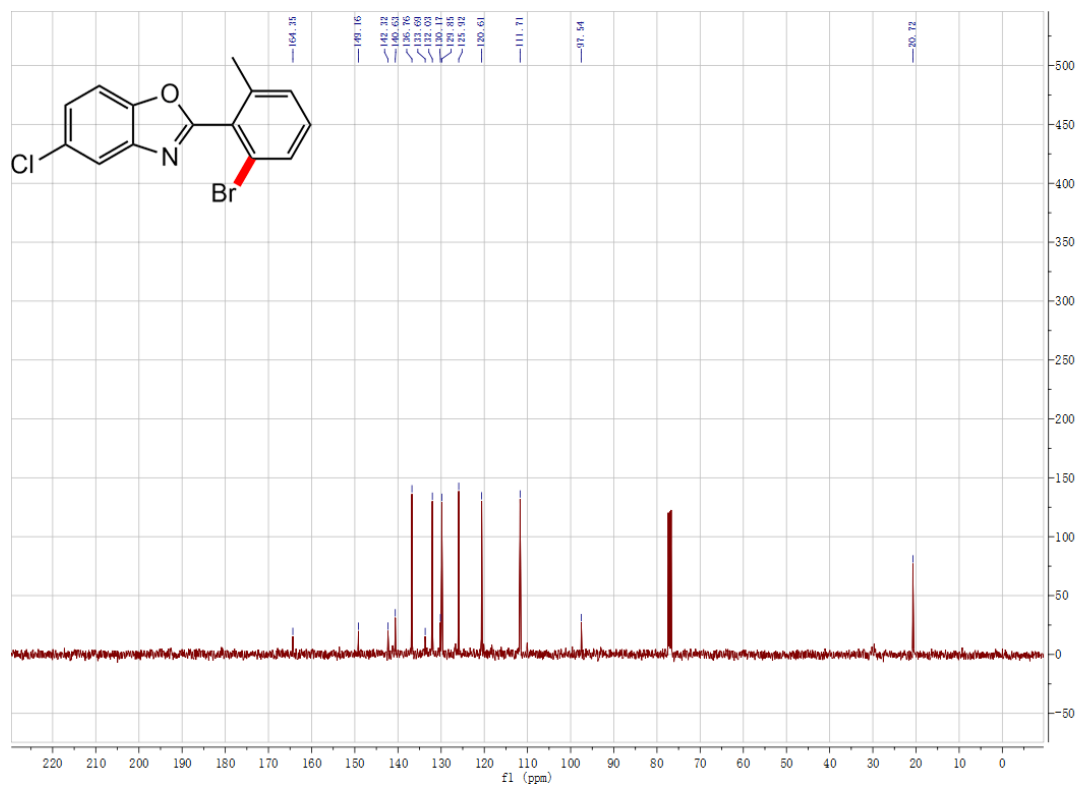

2-(2-bromo-6-fluorophenyl)-5-chlorobenzo[d]oxazole (2p)

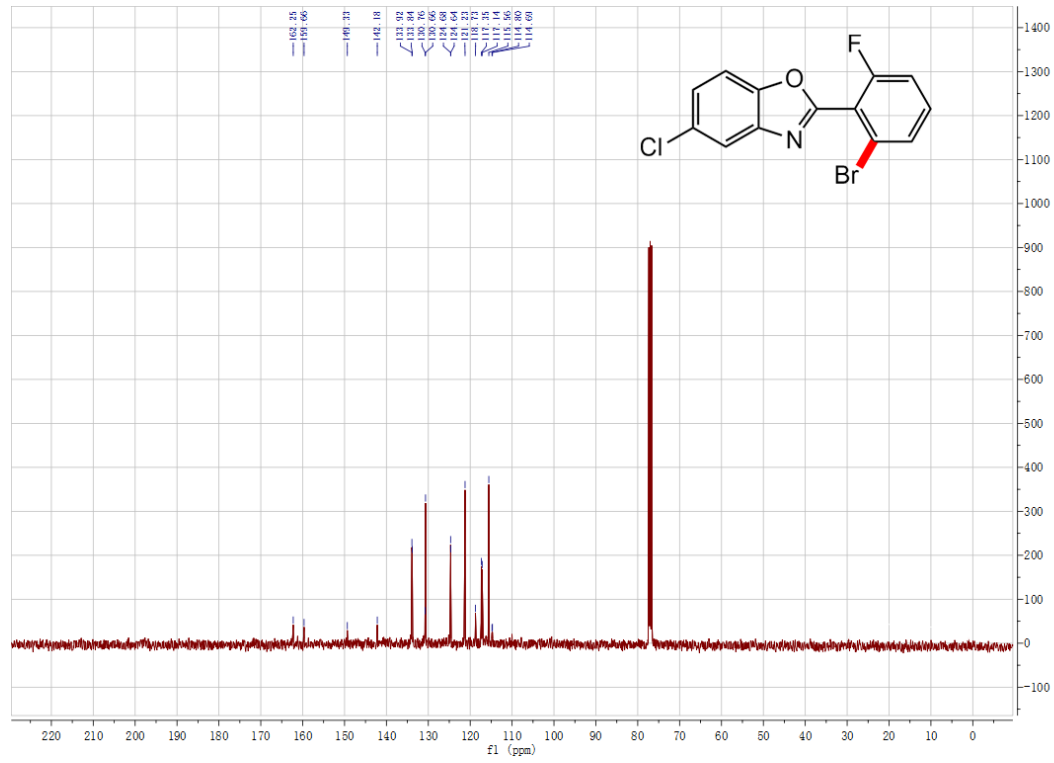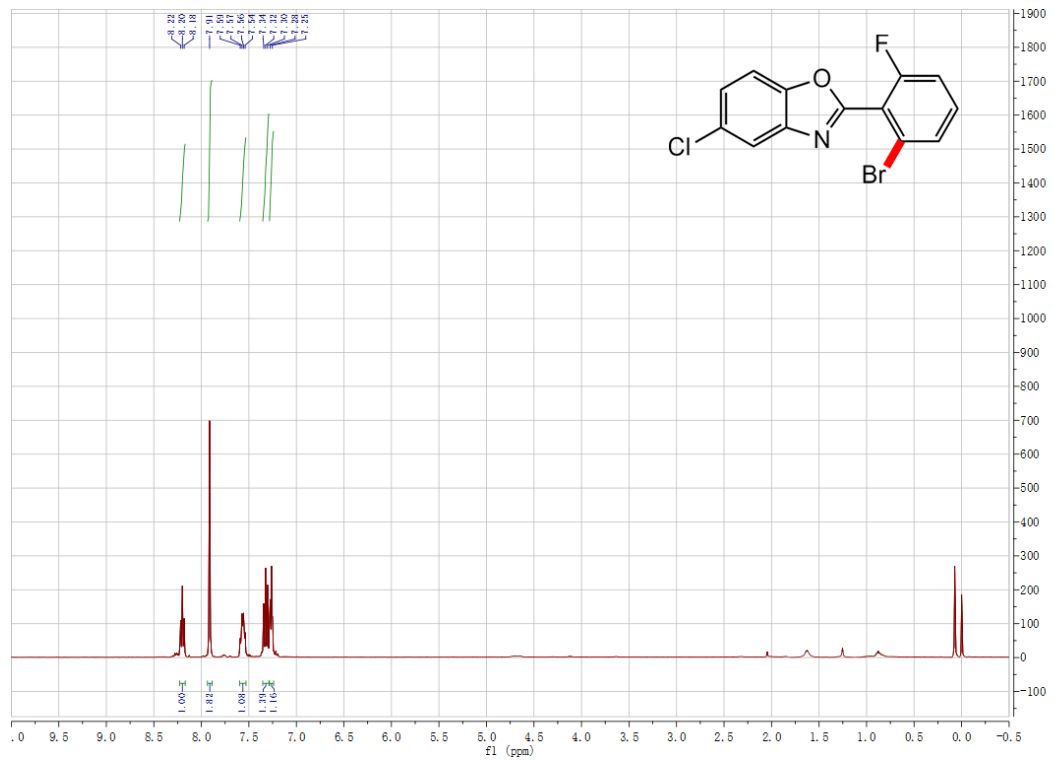

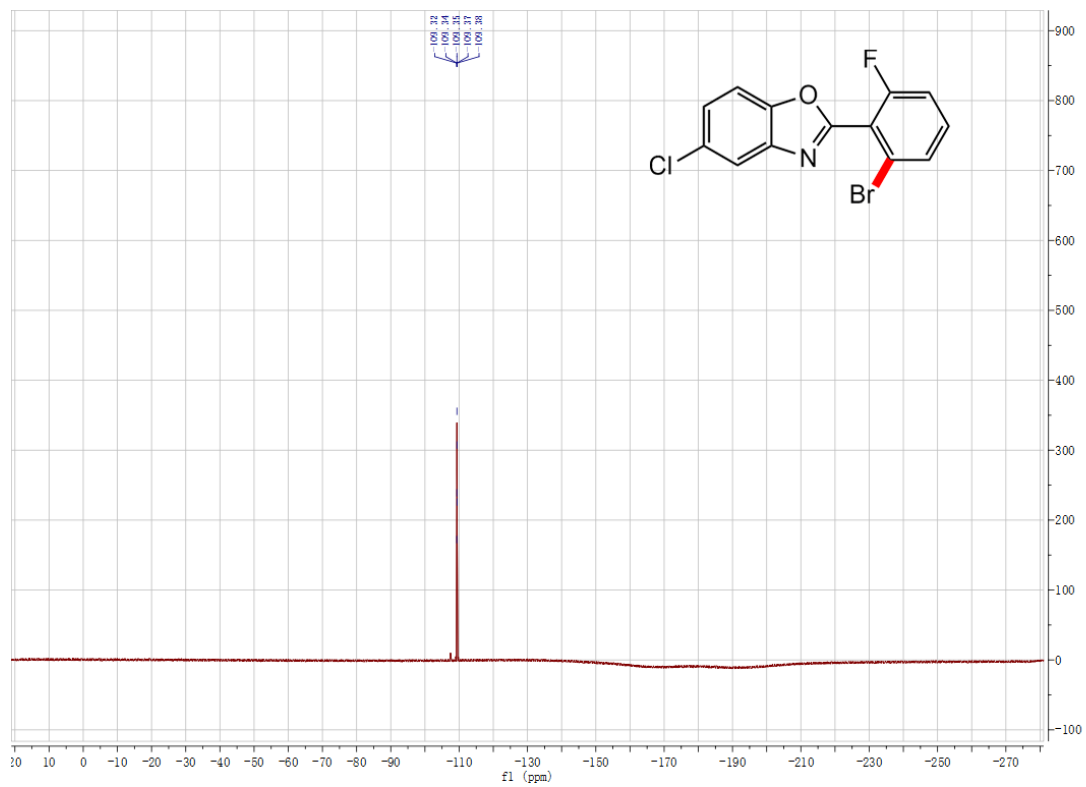

2-(2-bromo-6-methoxyphenyl)-5-chlorobenzo[d]oxazole (2q)

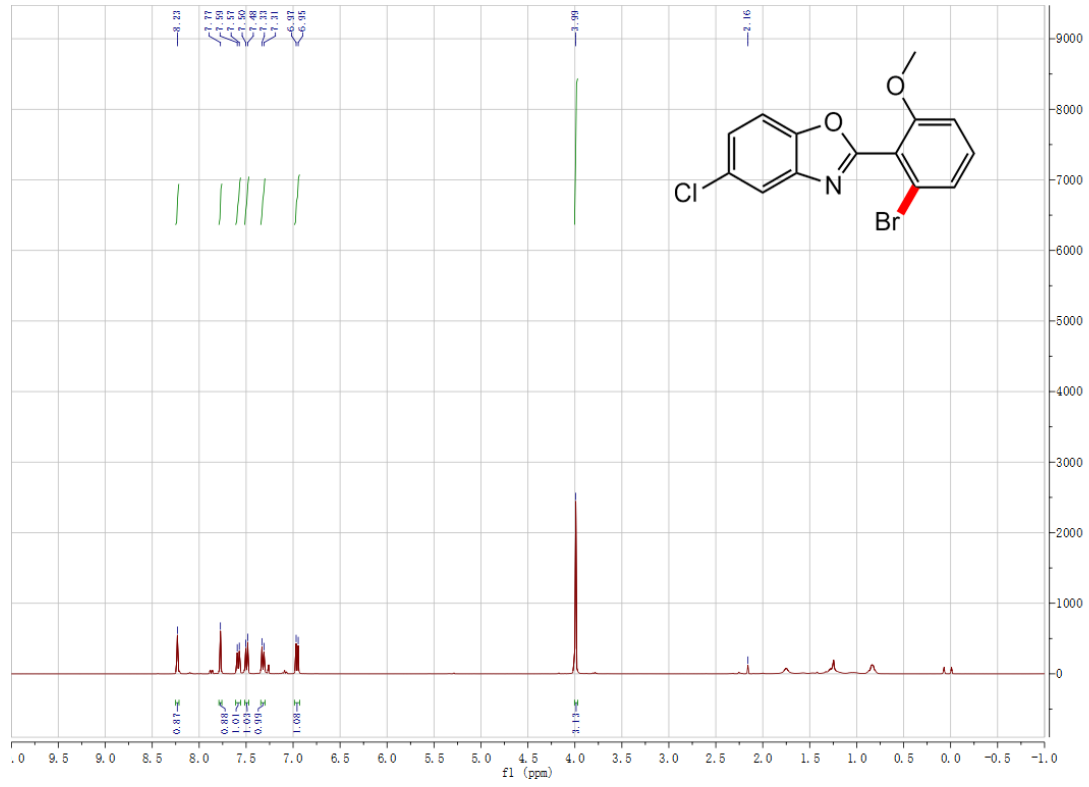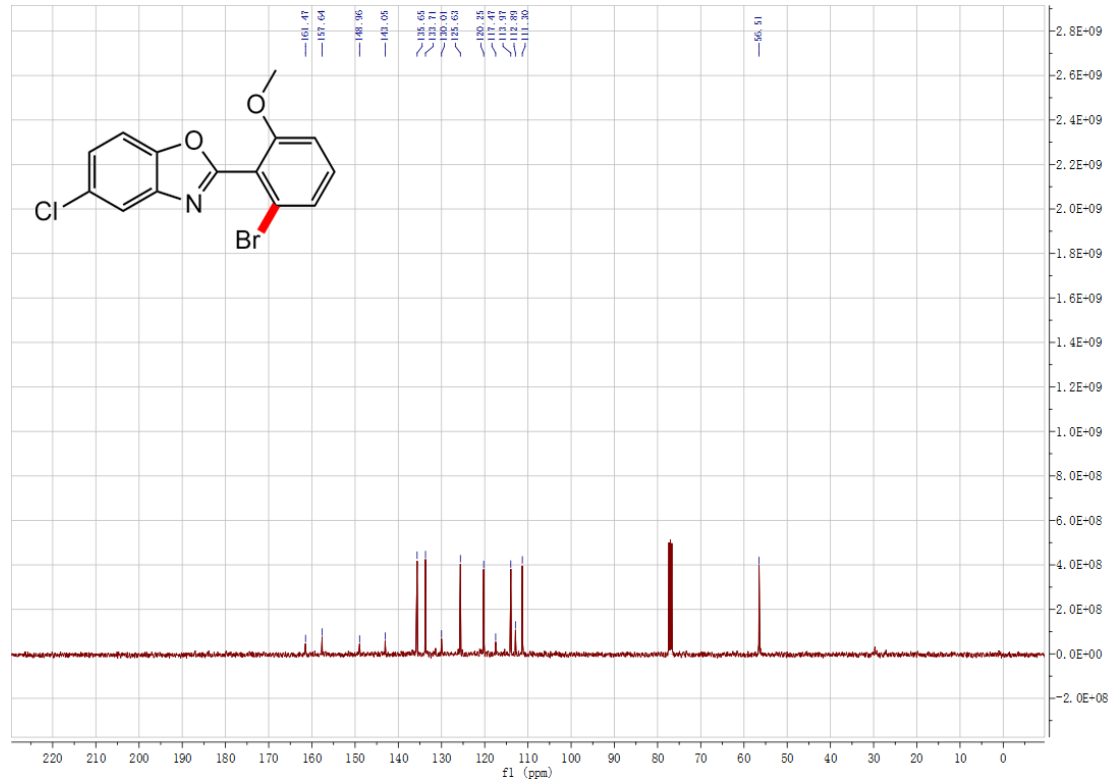

2-(2-bromo-6-methylphenyl)benzo[d]oxazole (2r)

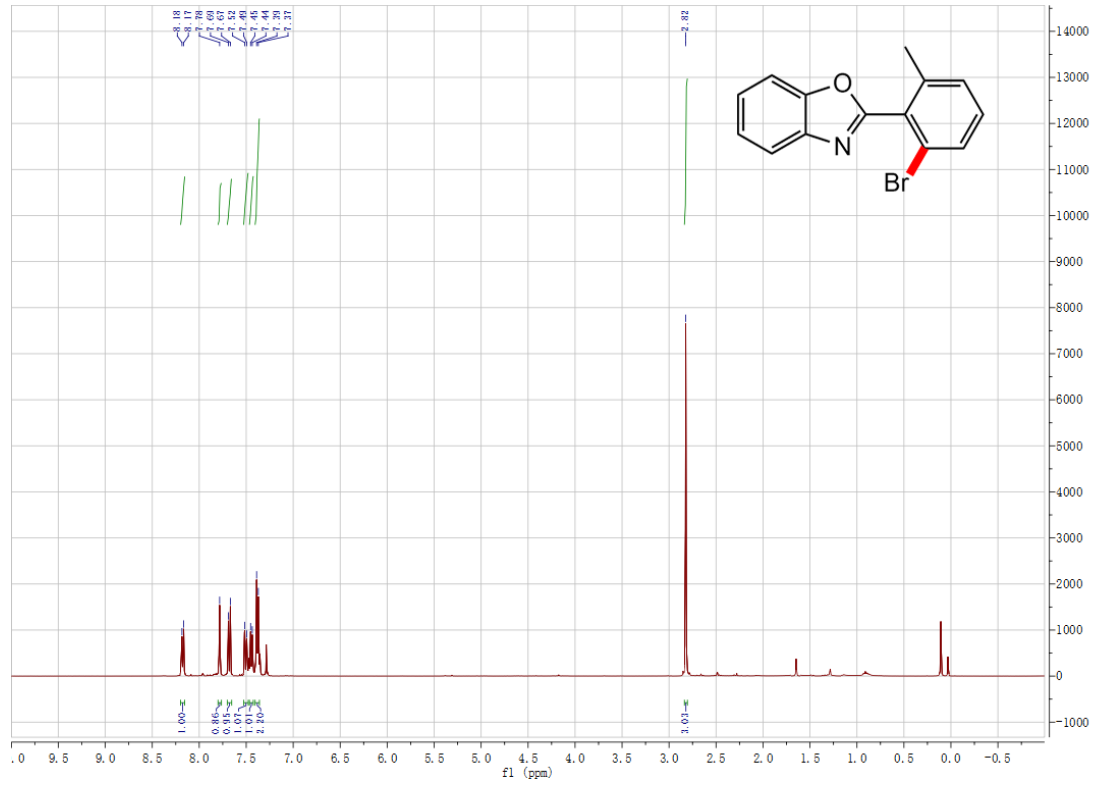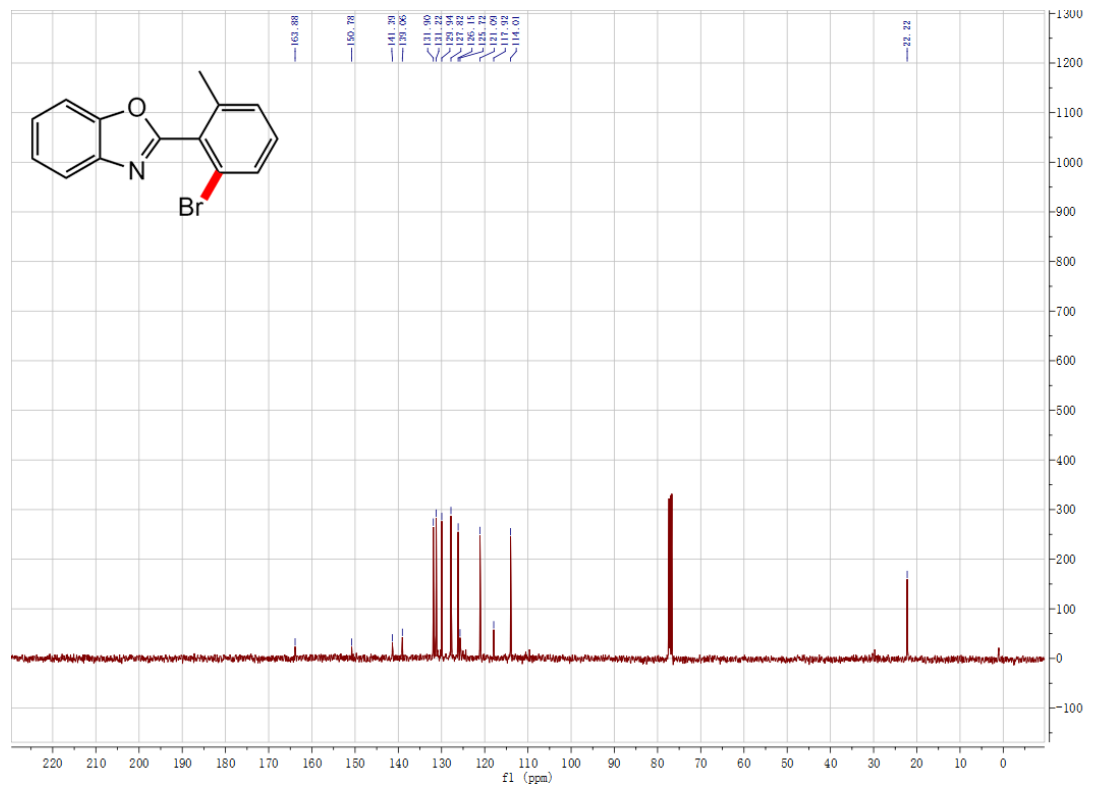

## 2-(2-bromo-6-fluorophenyl)benzo[d]oxazole (2s)

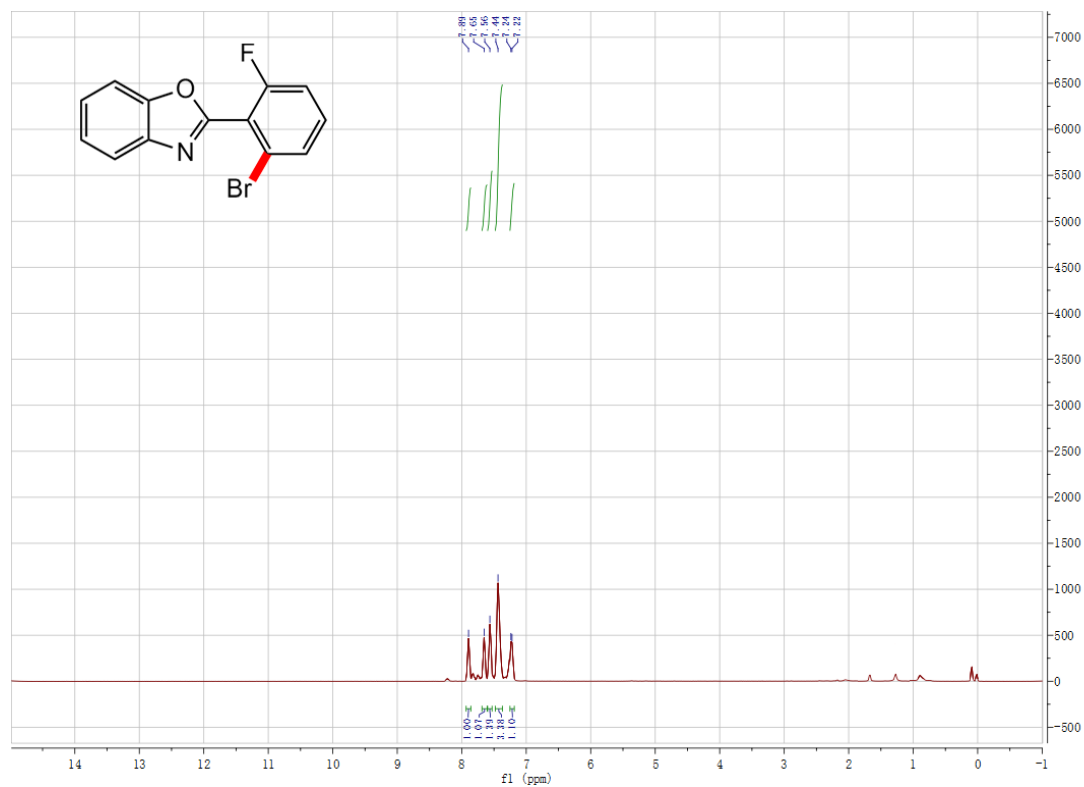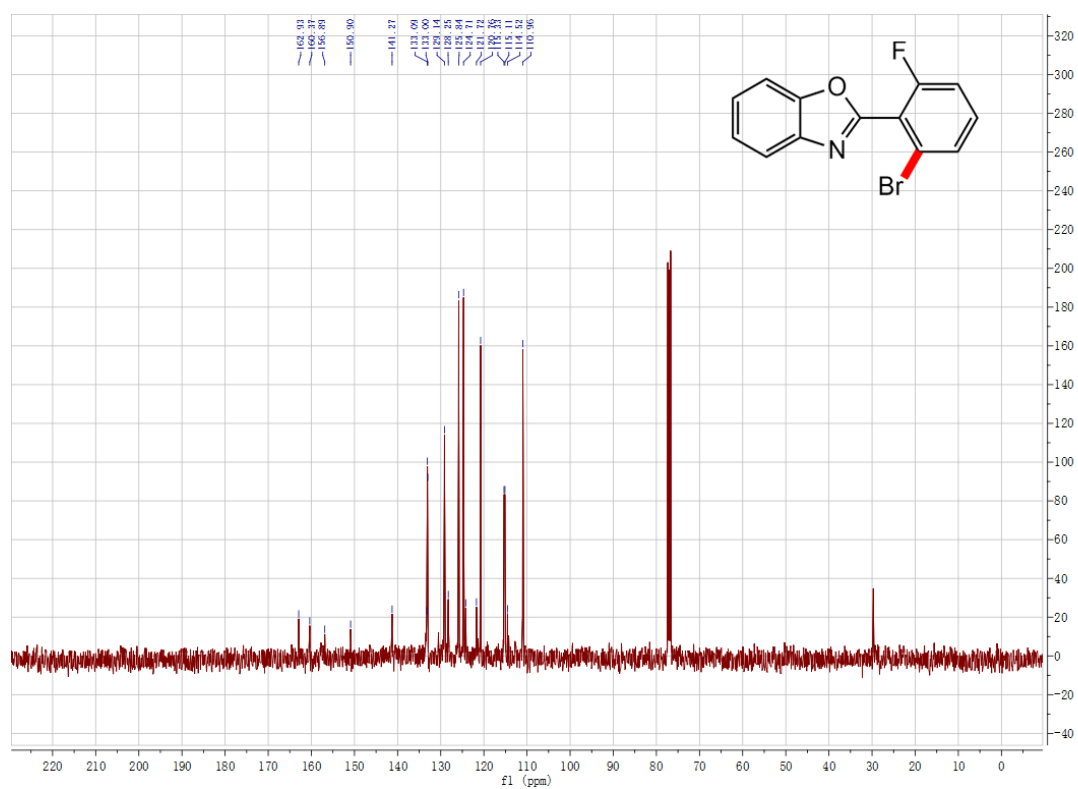

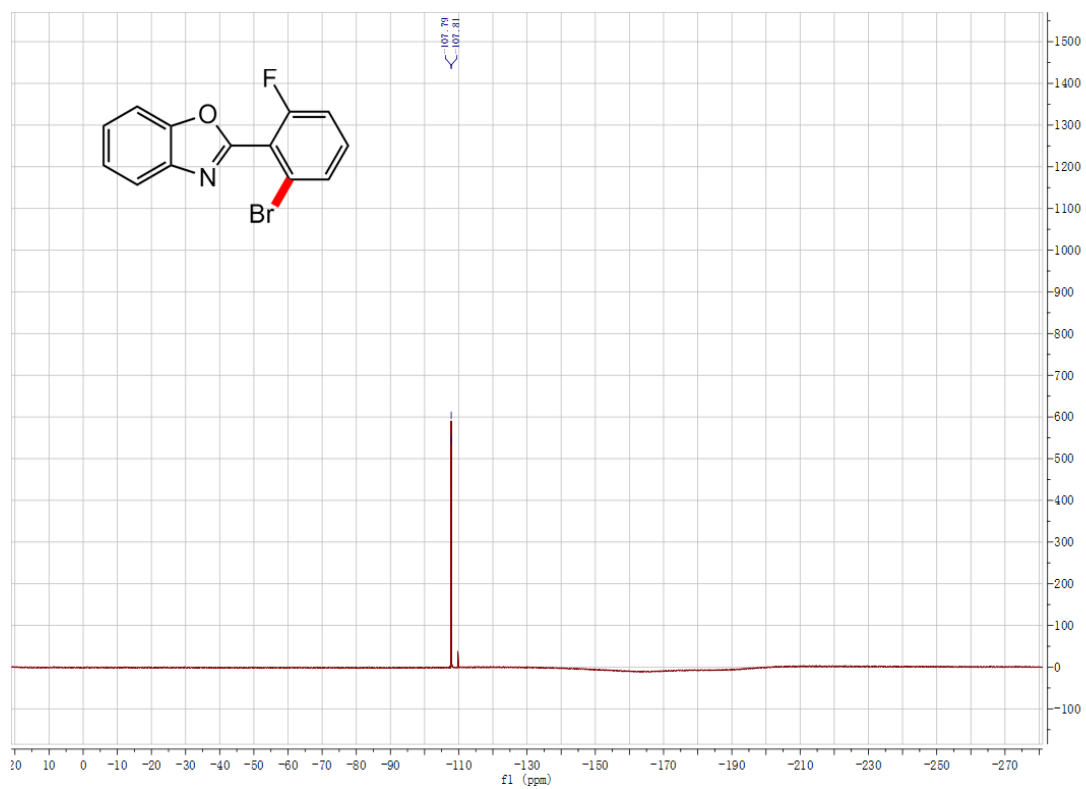





5-chloro-2-(2,6-dibromo-4-methylphenyl)benzo[d]oxazole (2u)

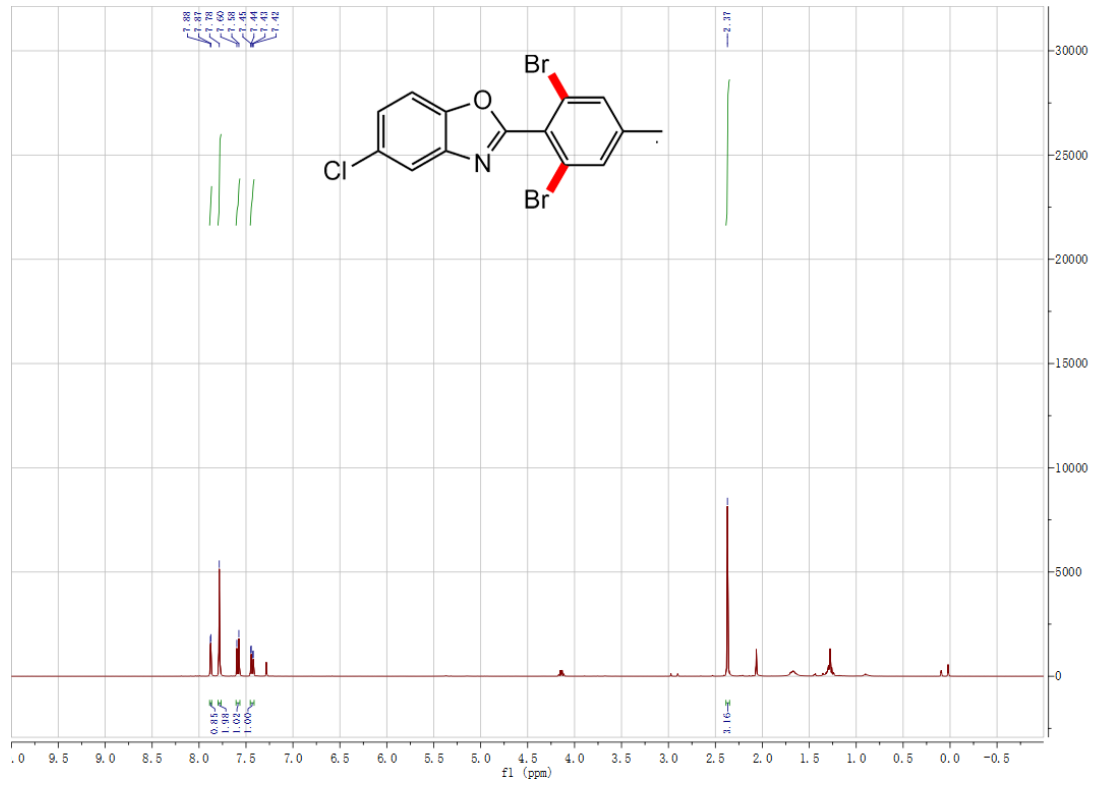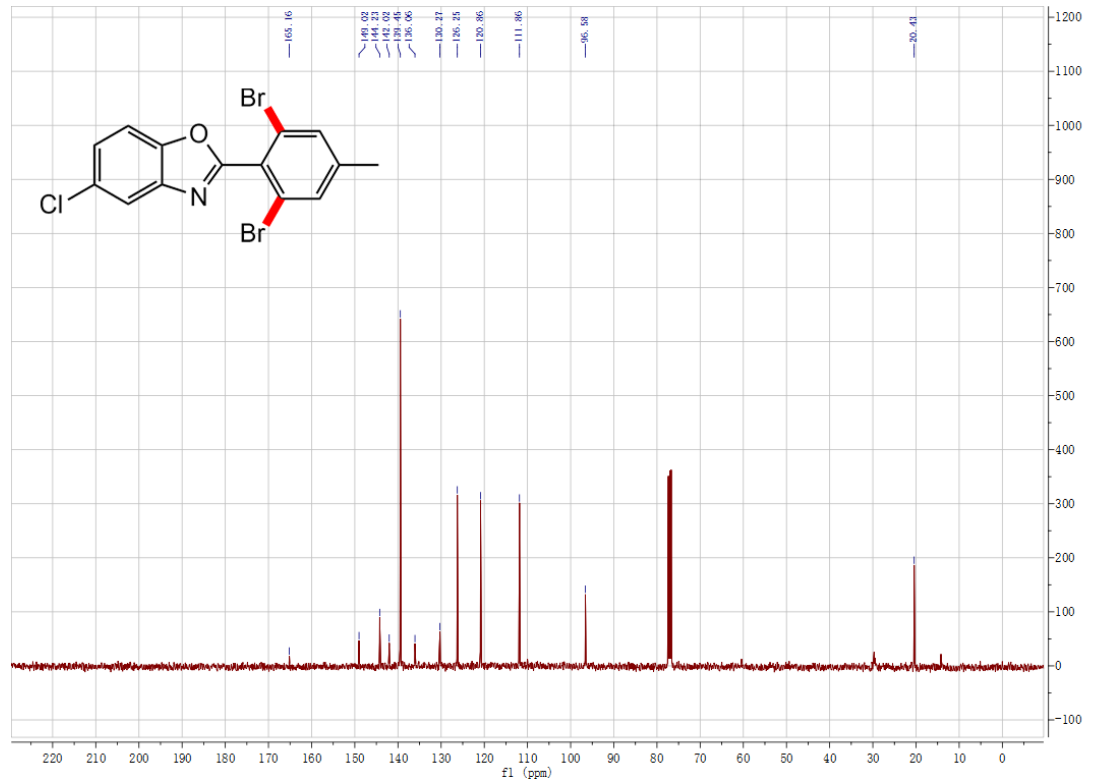

5-chloro-2-(2,6-dibromo-4-chlorophenyl)benzo[d]oxazole (2v)

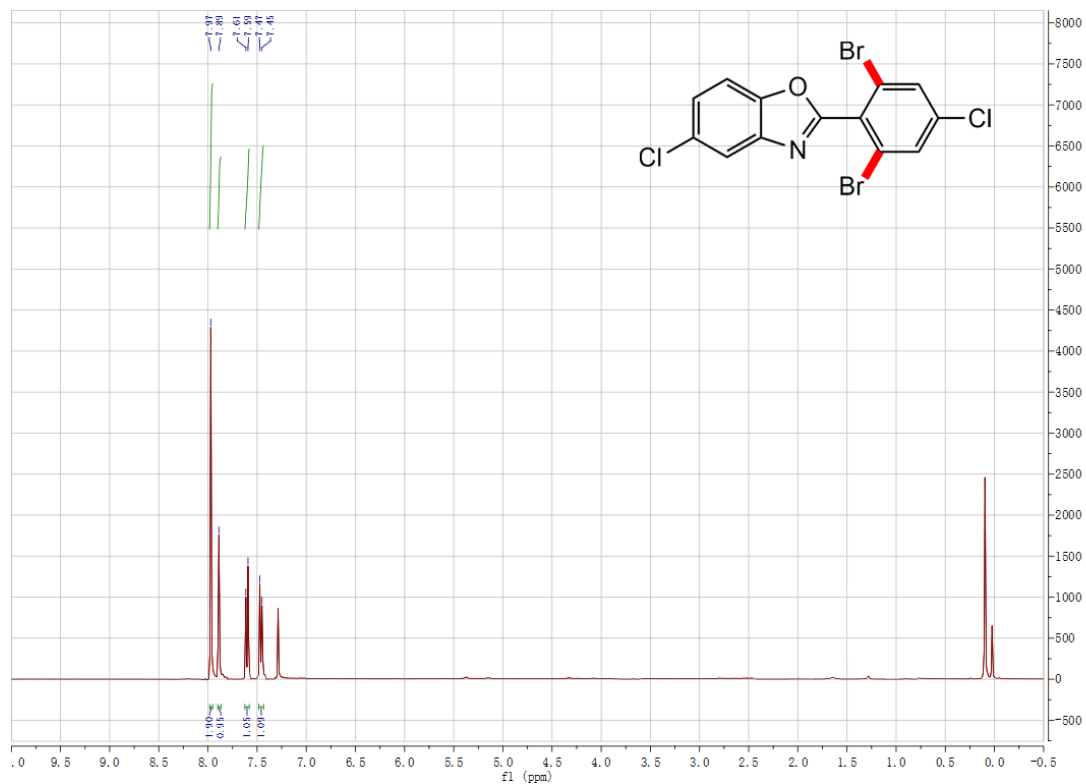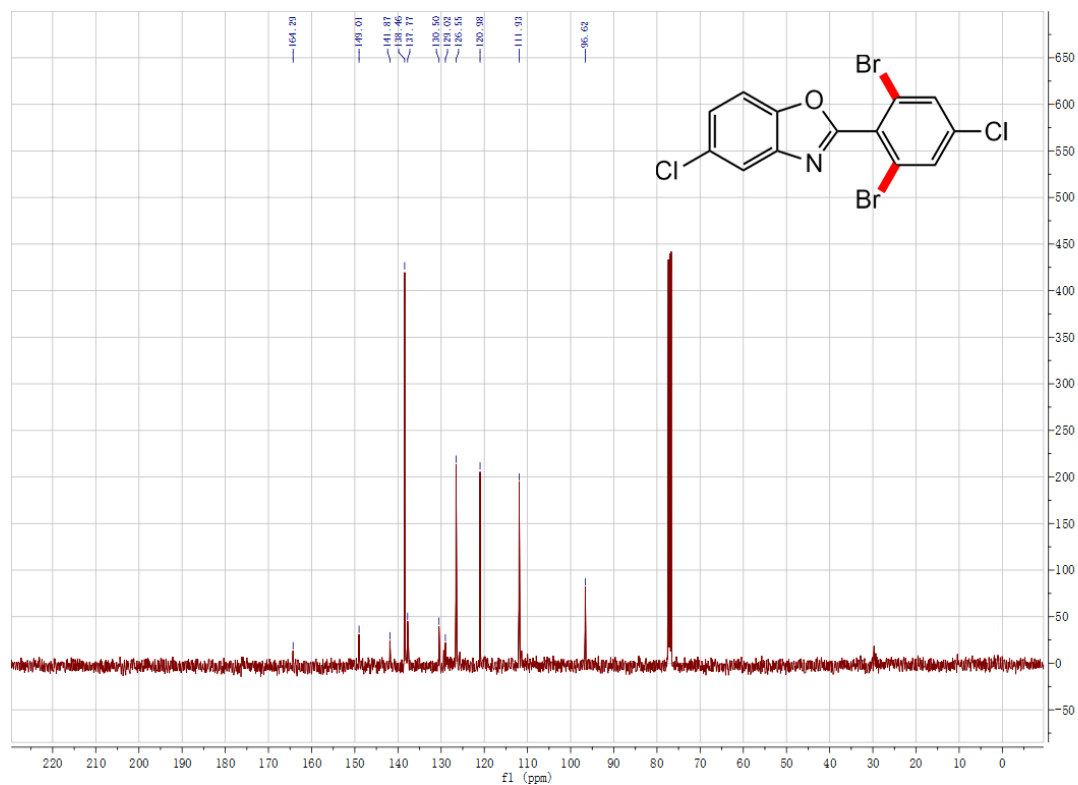

2-(2,6-dibromo-4-methylphenyl)benzo[d]oxazole (2w)

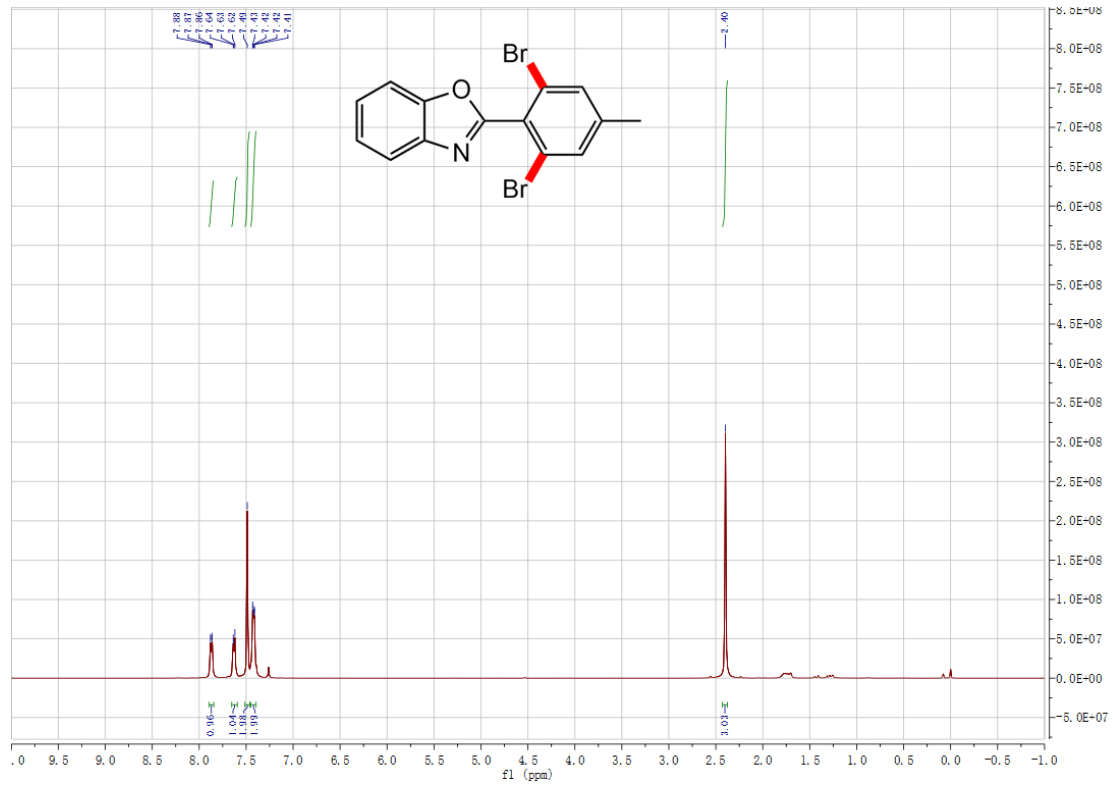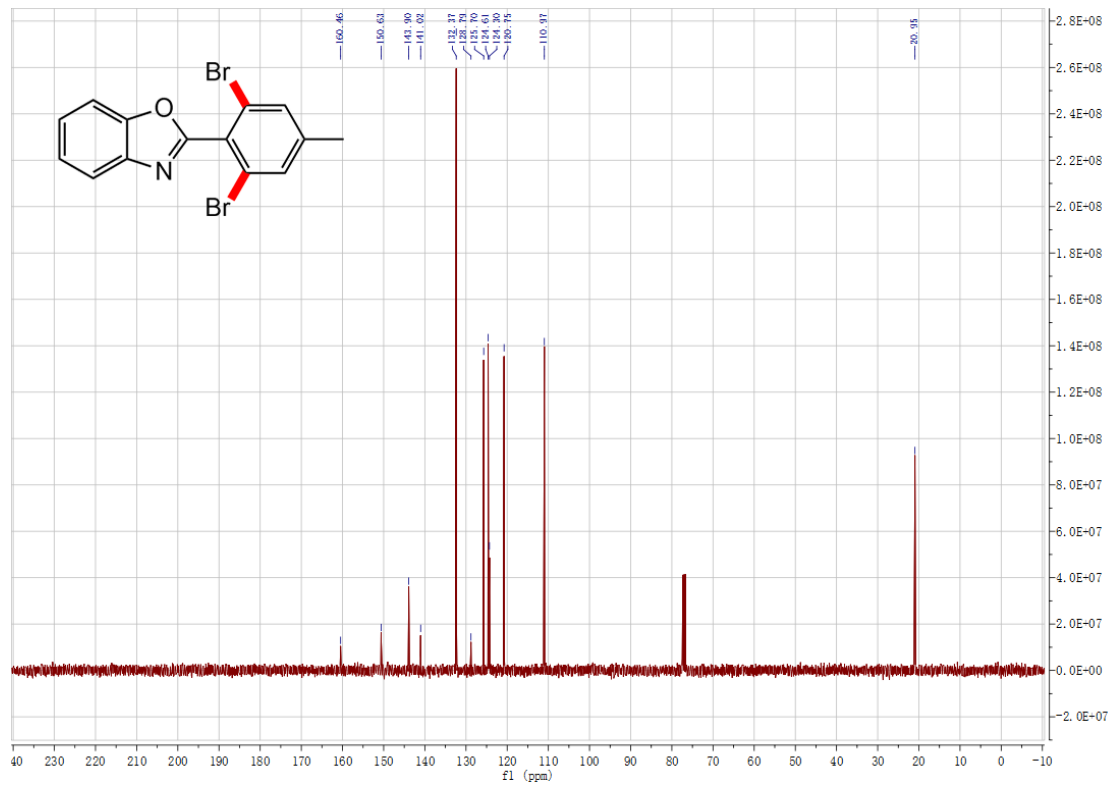

5-(tert-butyl)-2-(2,6-dibromo-4-methylphenyl)benzo[d]oxazole (2x)

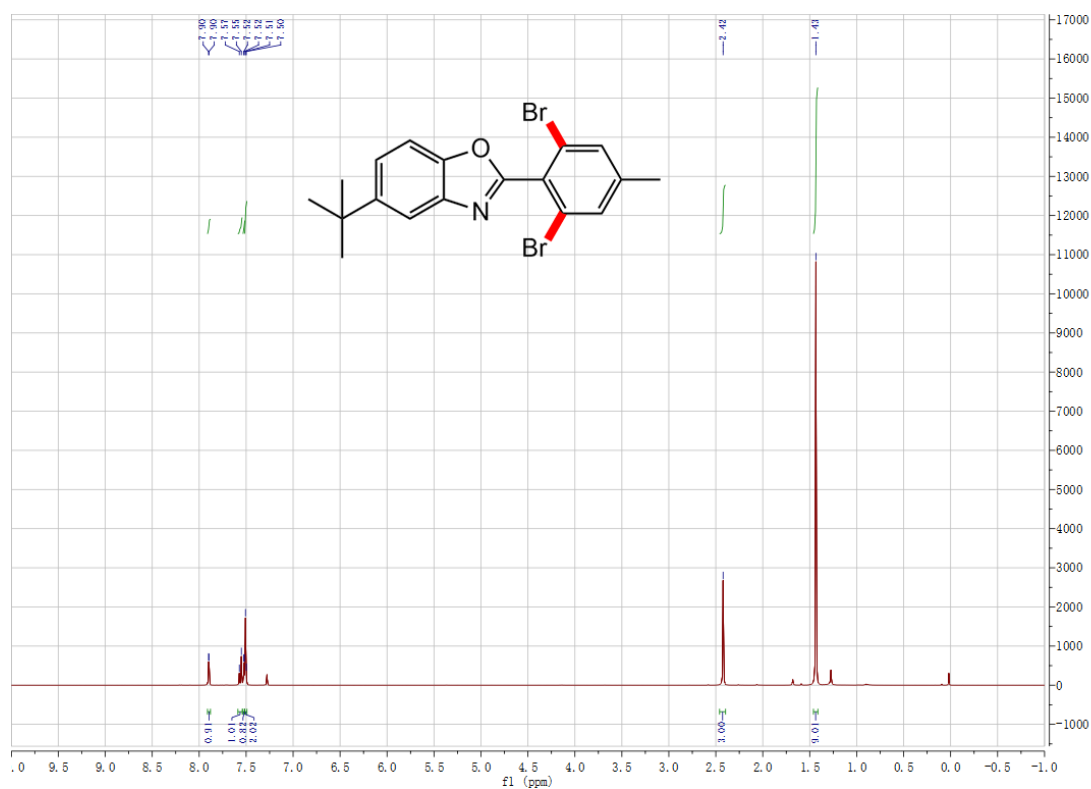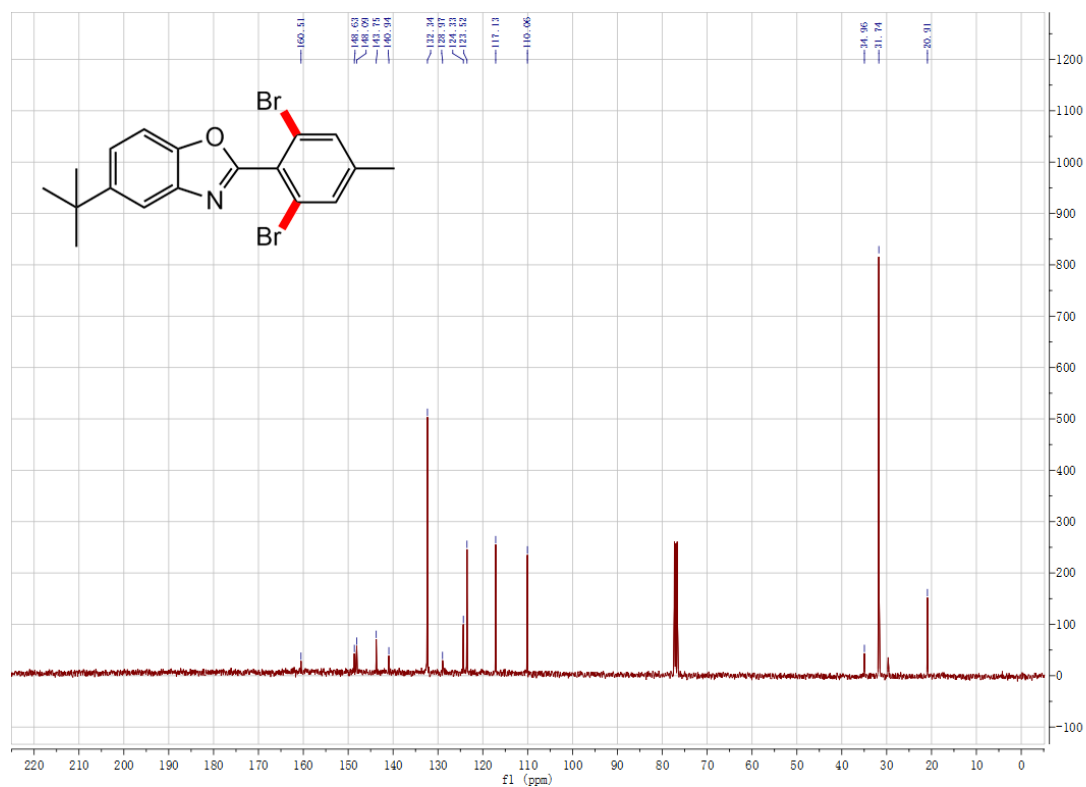

### 2-(2-iodo-6-methylphenyl)-5-methylbenzo[d]oxazole (3a)

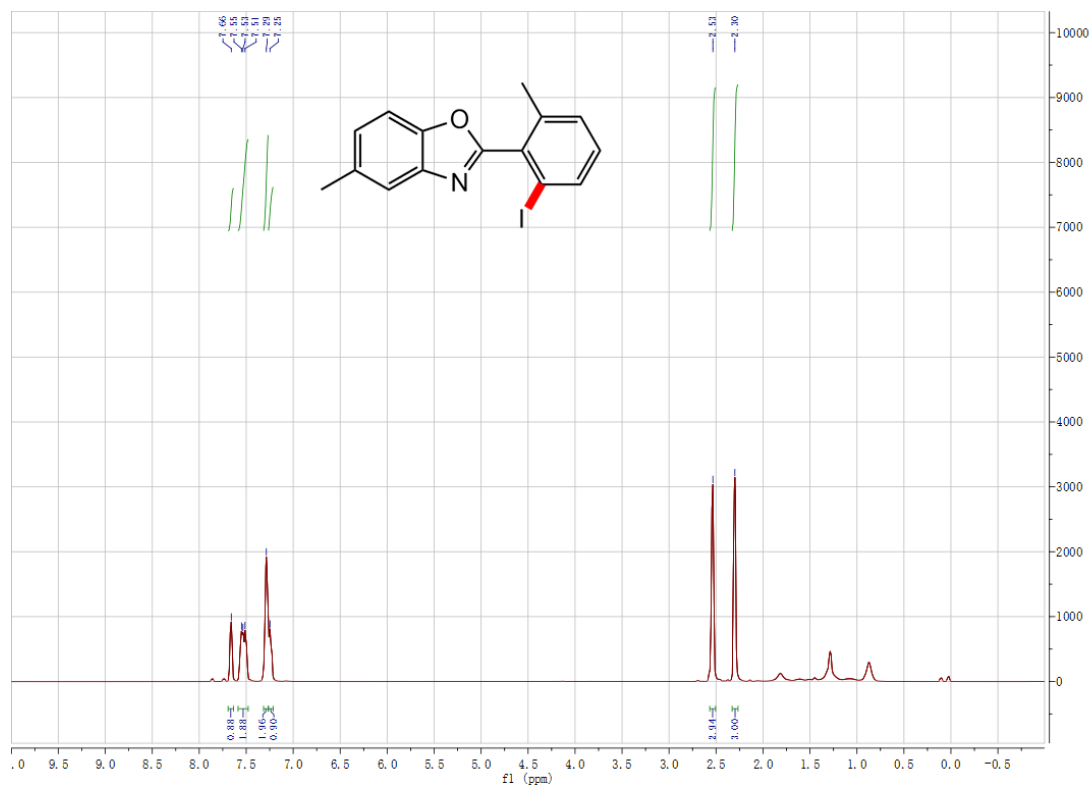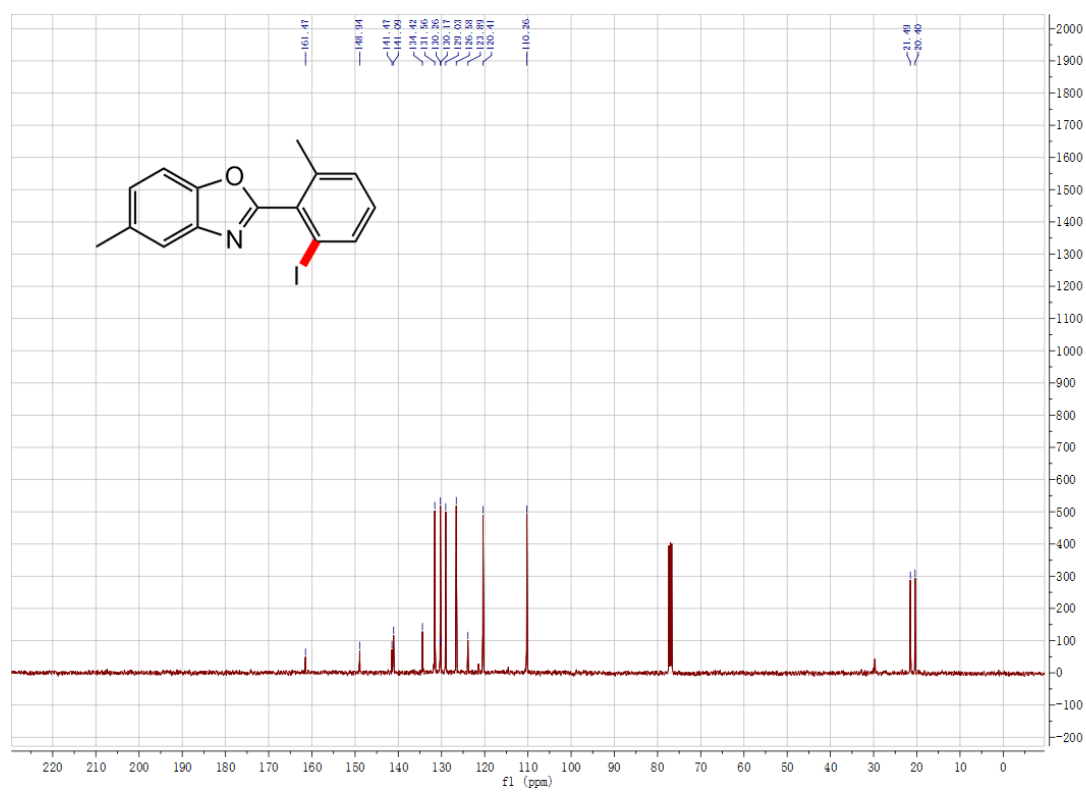

2-(2-fluoro-6-iodophenyl)-5-methylbenzo[d]oxazole (3b)

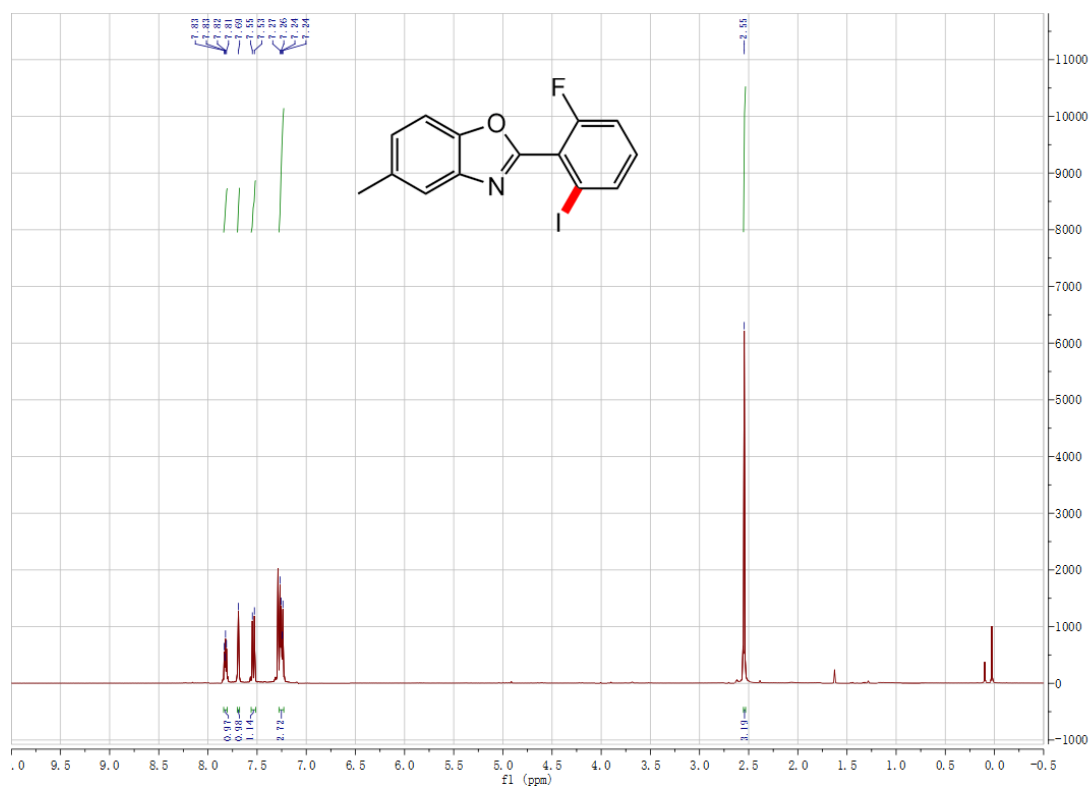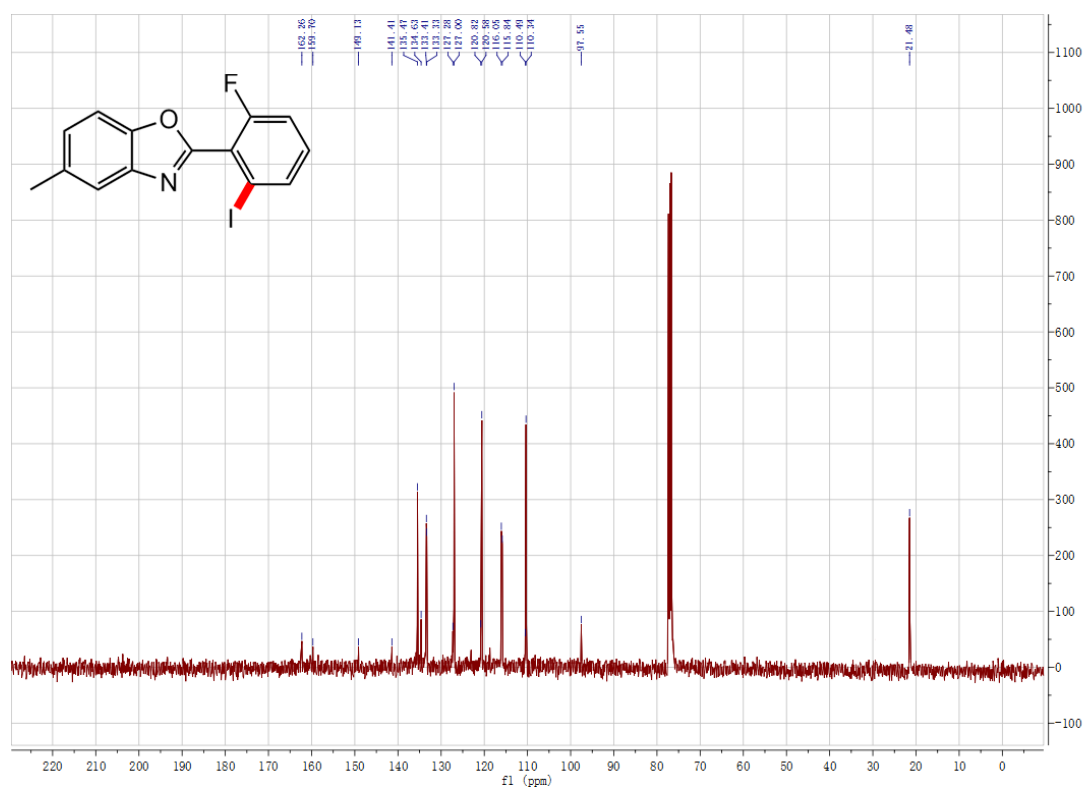

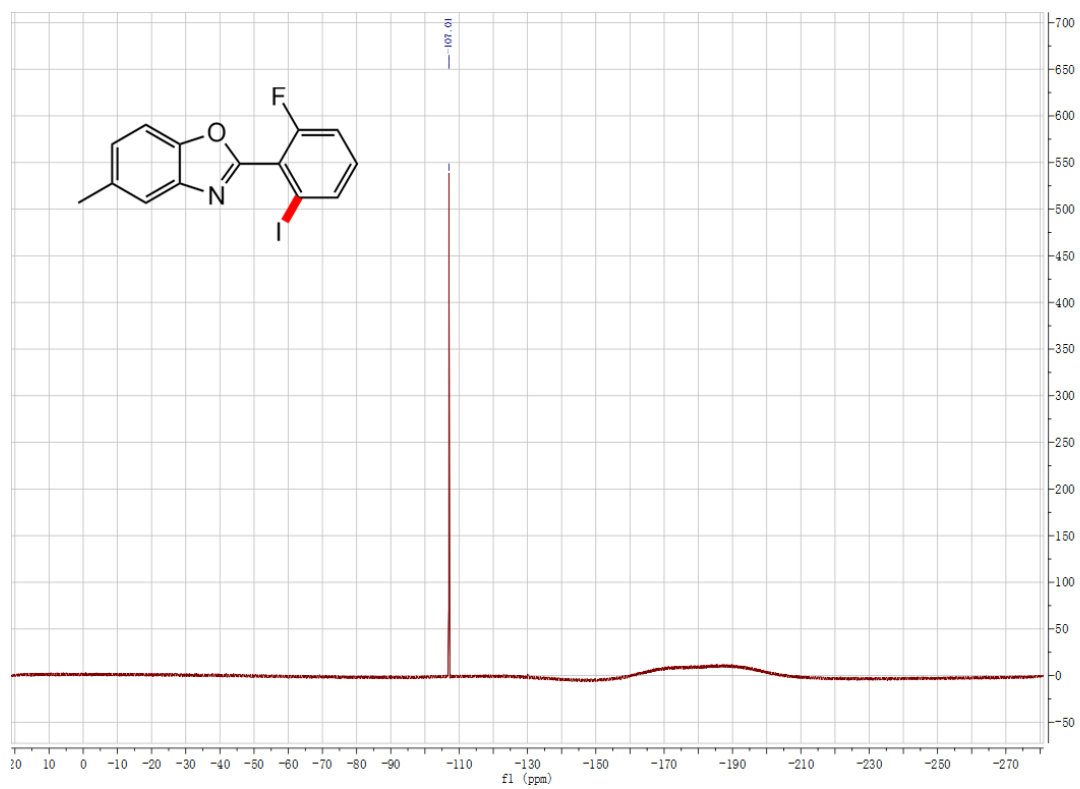

2-(2-chloro-6-iodophenyl)-5-methylbenzo[d]oxazole (3c)

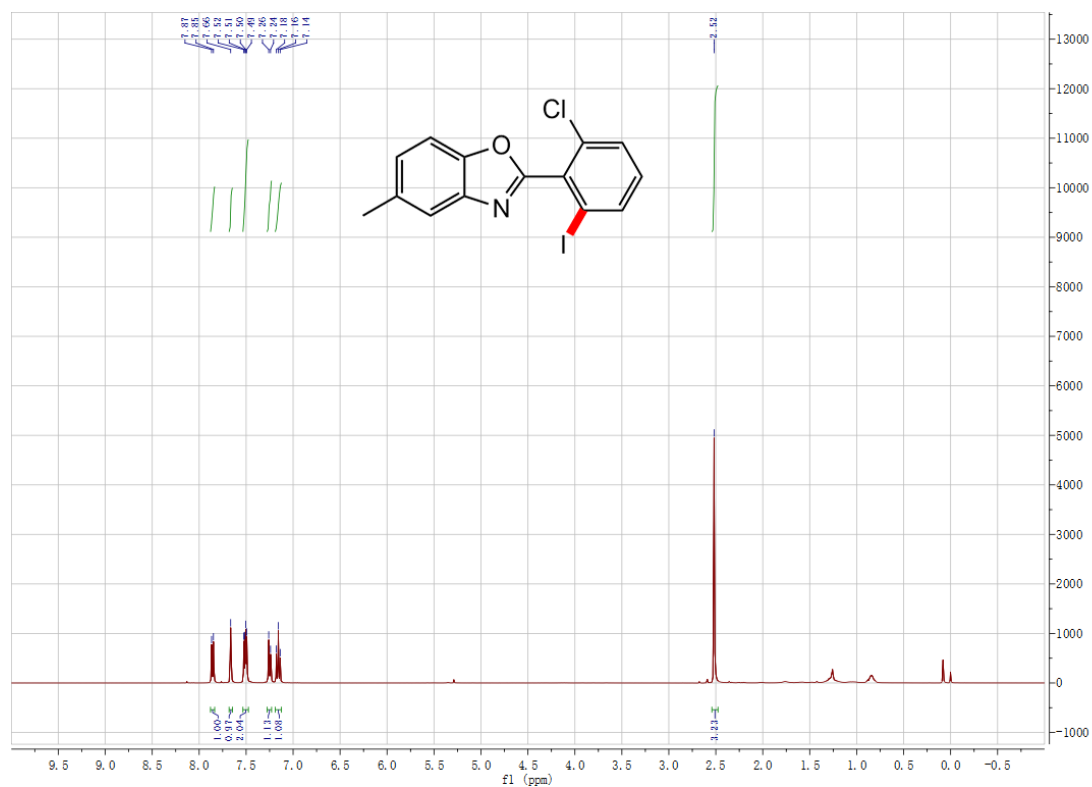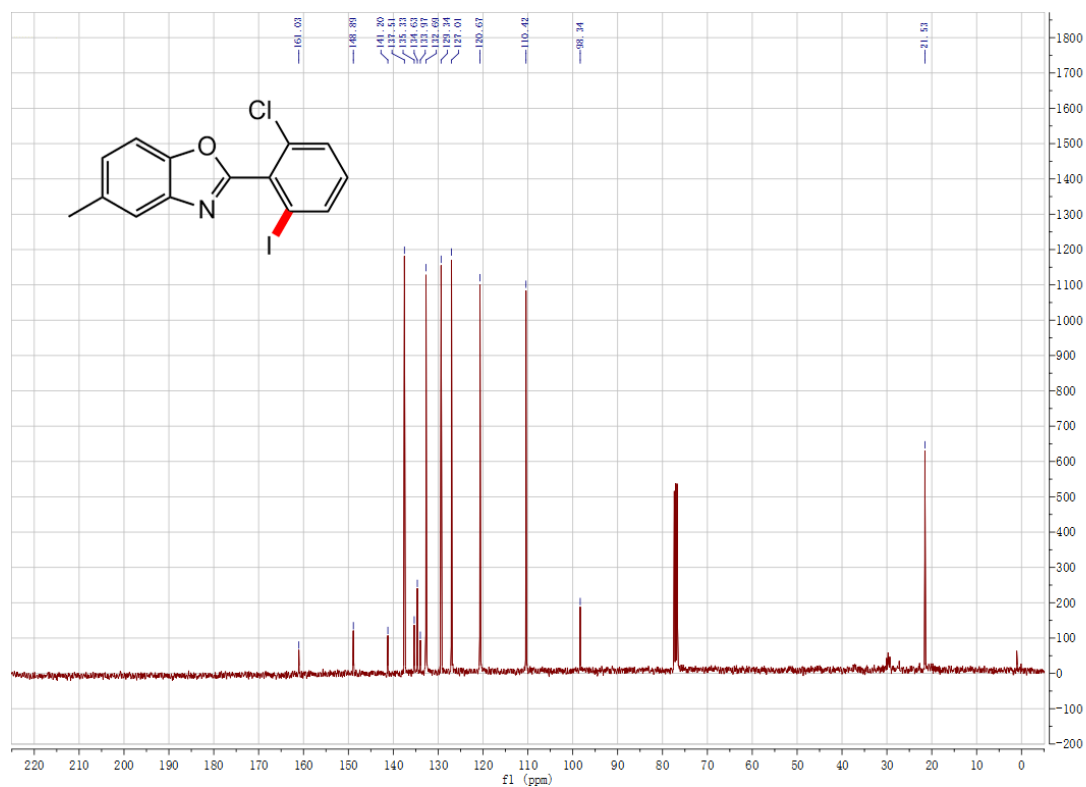



2-(2-bromo-6-iodophenyl)-5-methylbenzo[d]oxazole (3m)

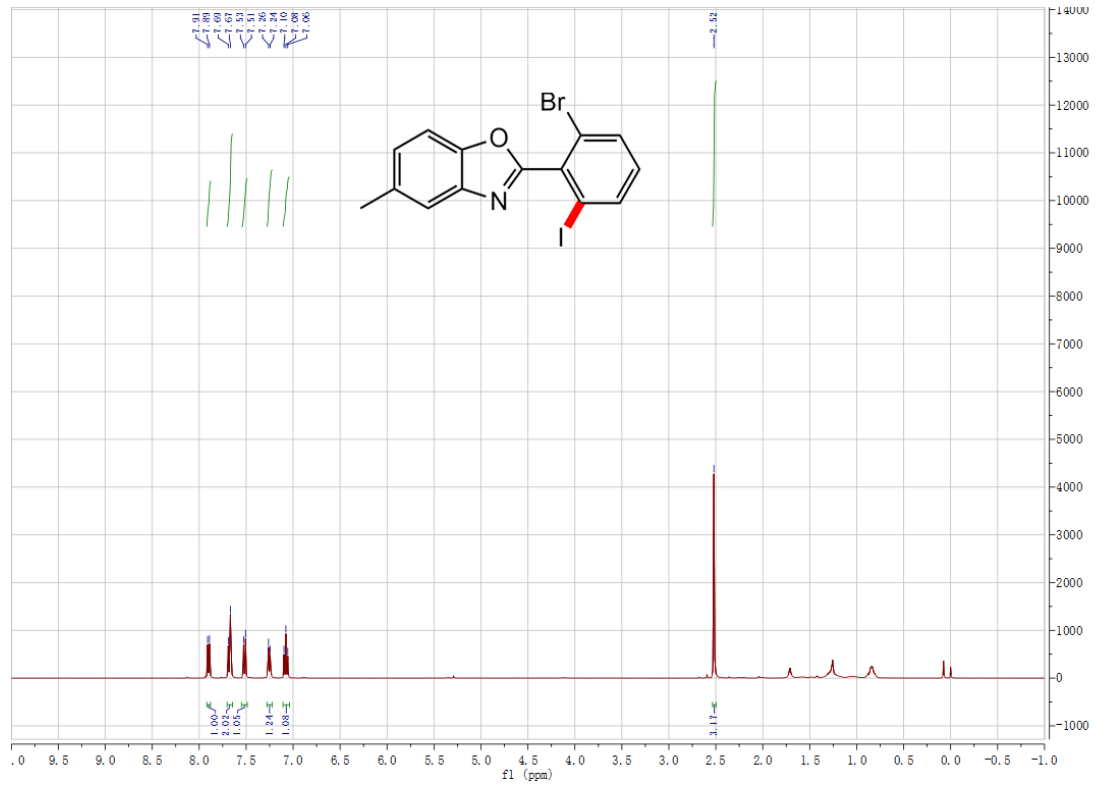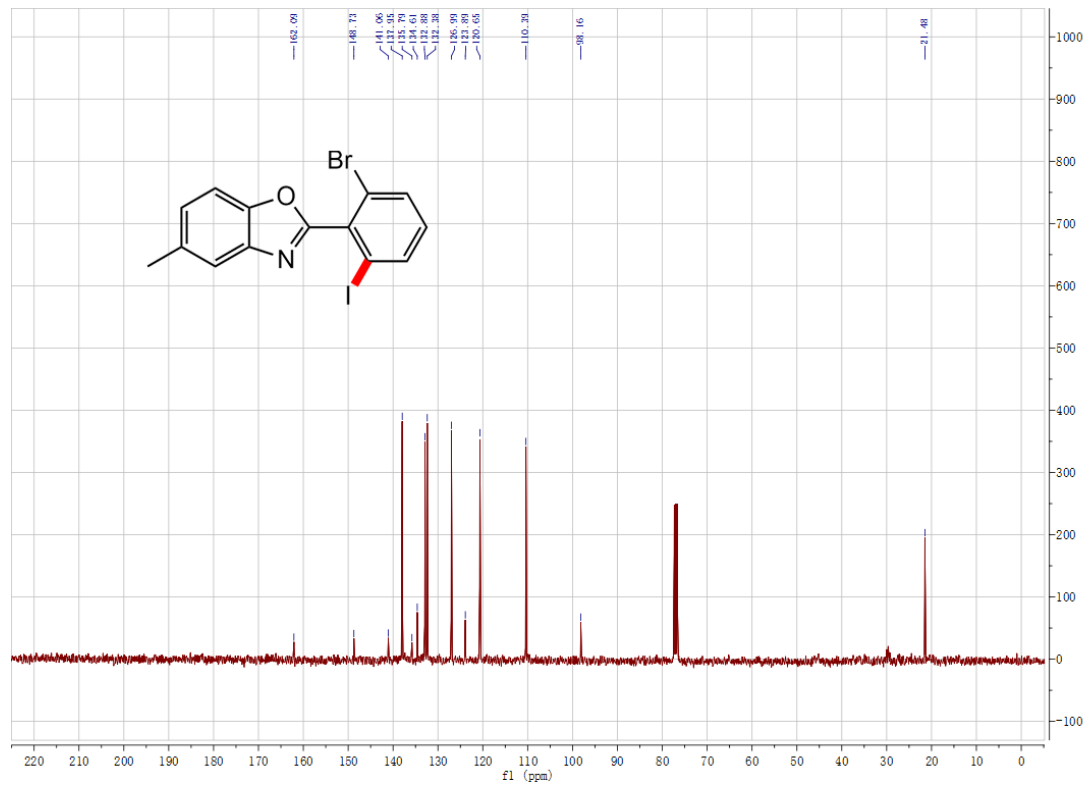

2-(2-iodo-6-methoxyphenyl)-5-methylbenzo[d]oxazole (3n)

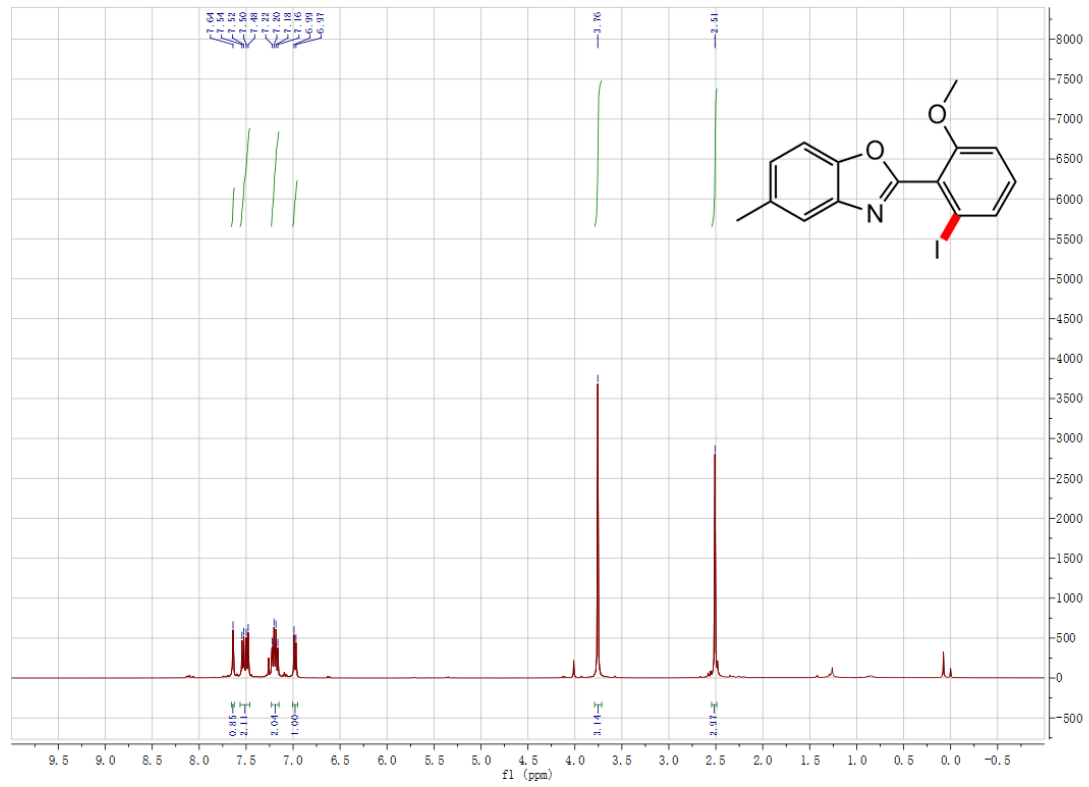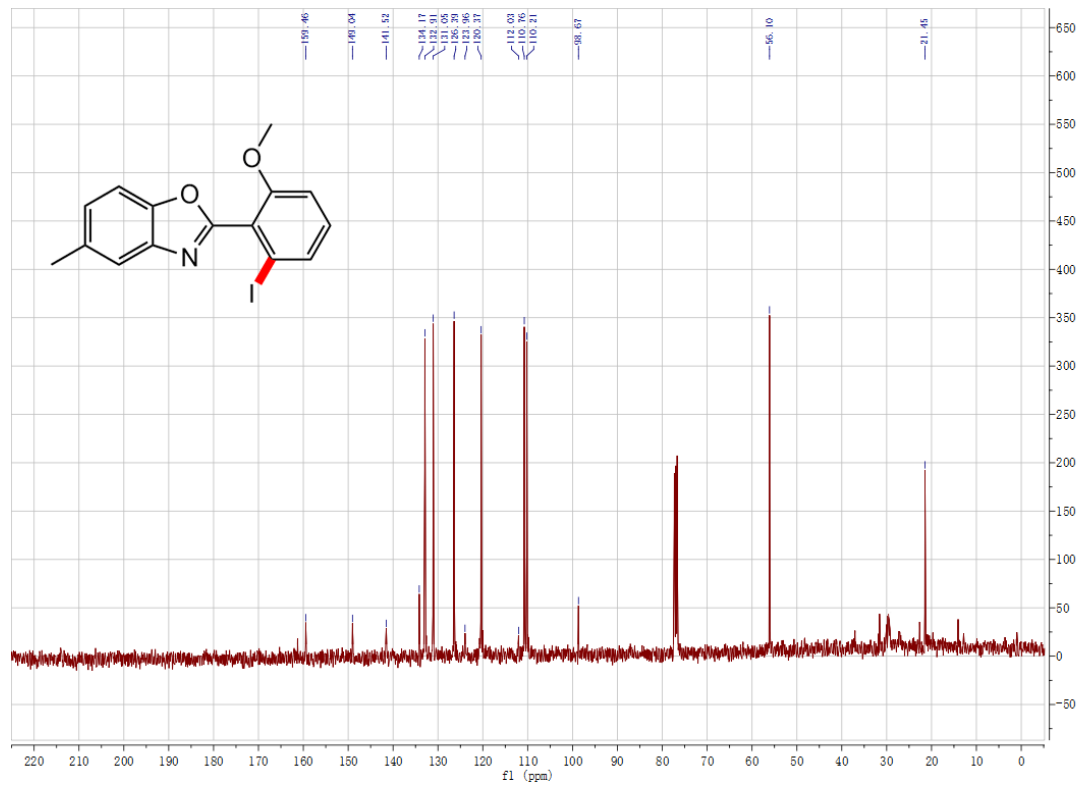

5-chloro-2-(2-iodo-6-methylphenyl)benzo[d]oxazole (3o)

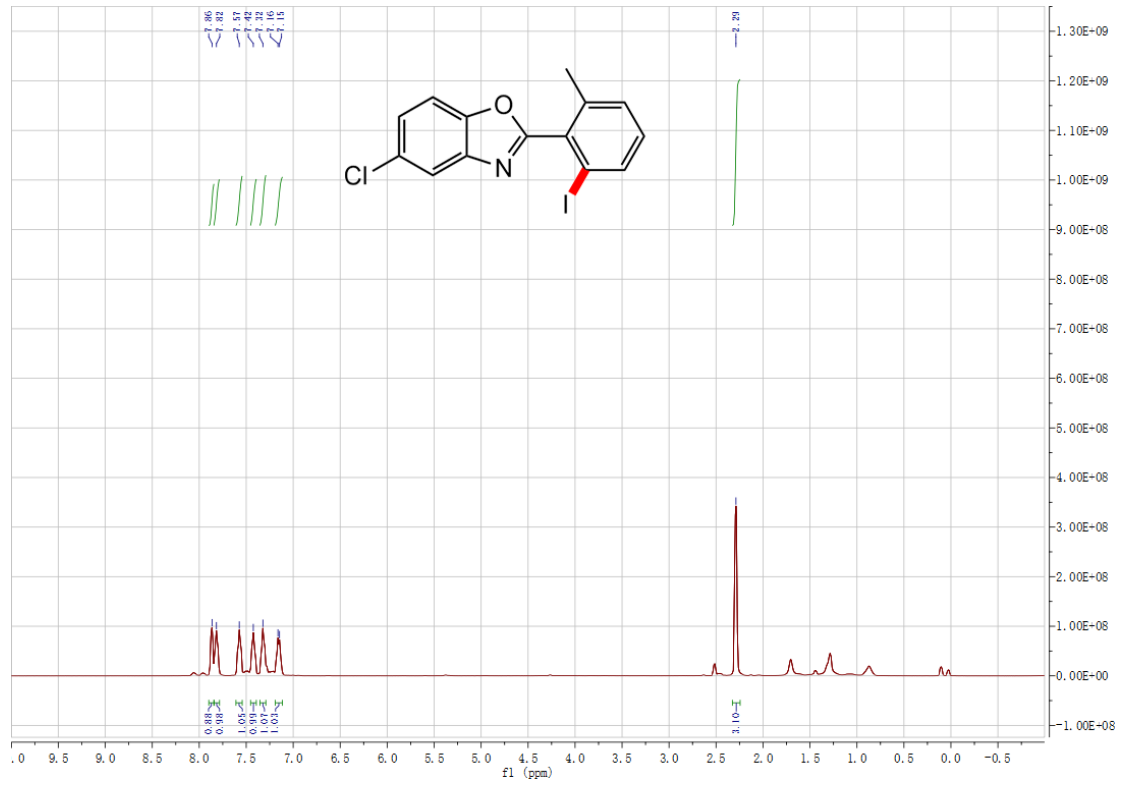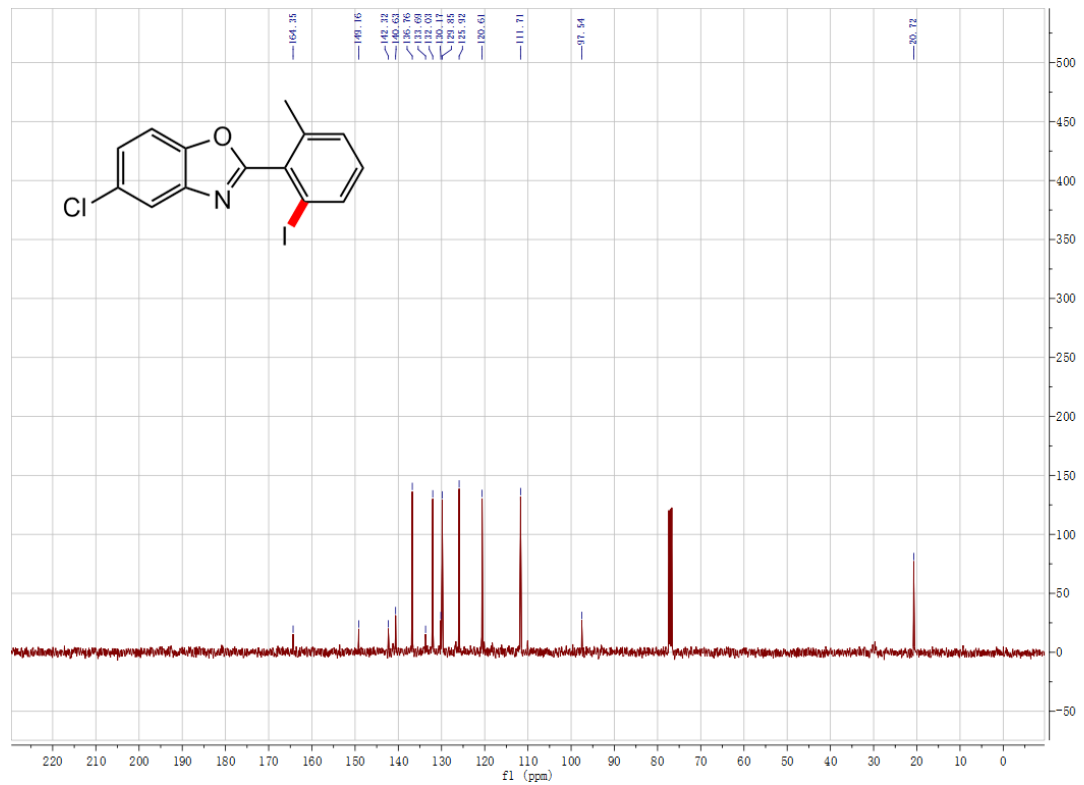

5-chloro-2-(2-fluoro-6-iodophenyl)benzo[*a*]oxazole (3p)

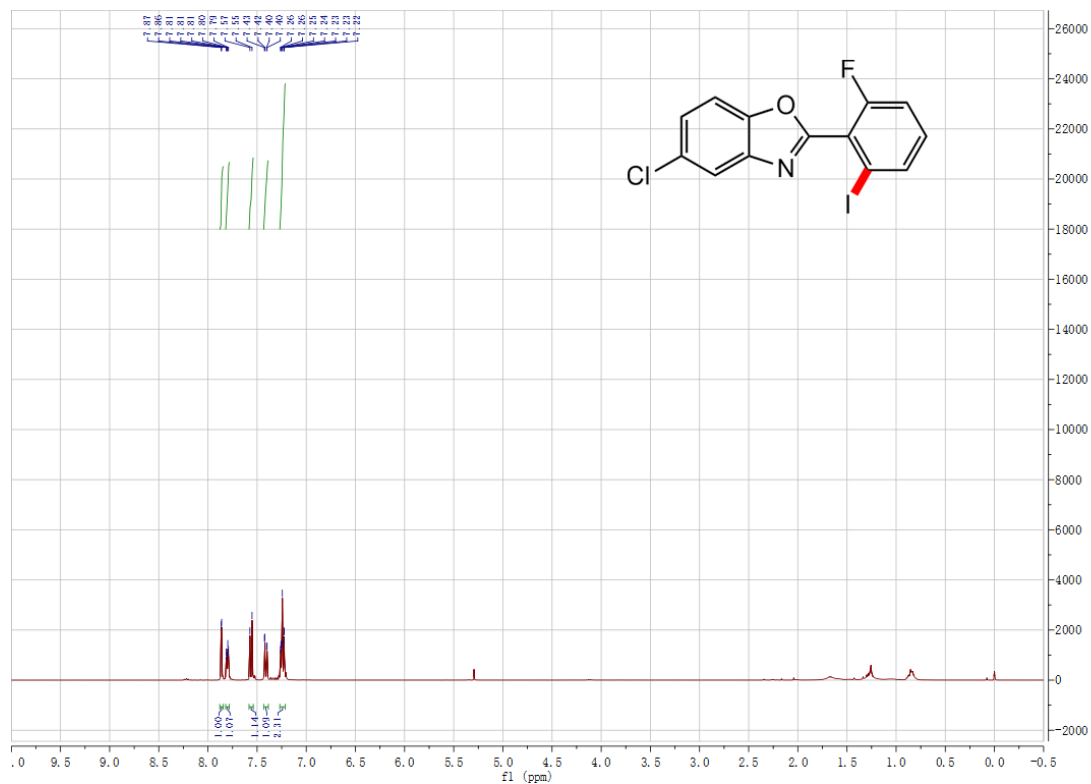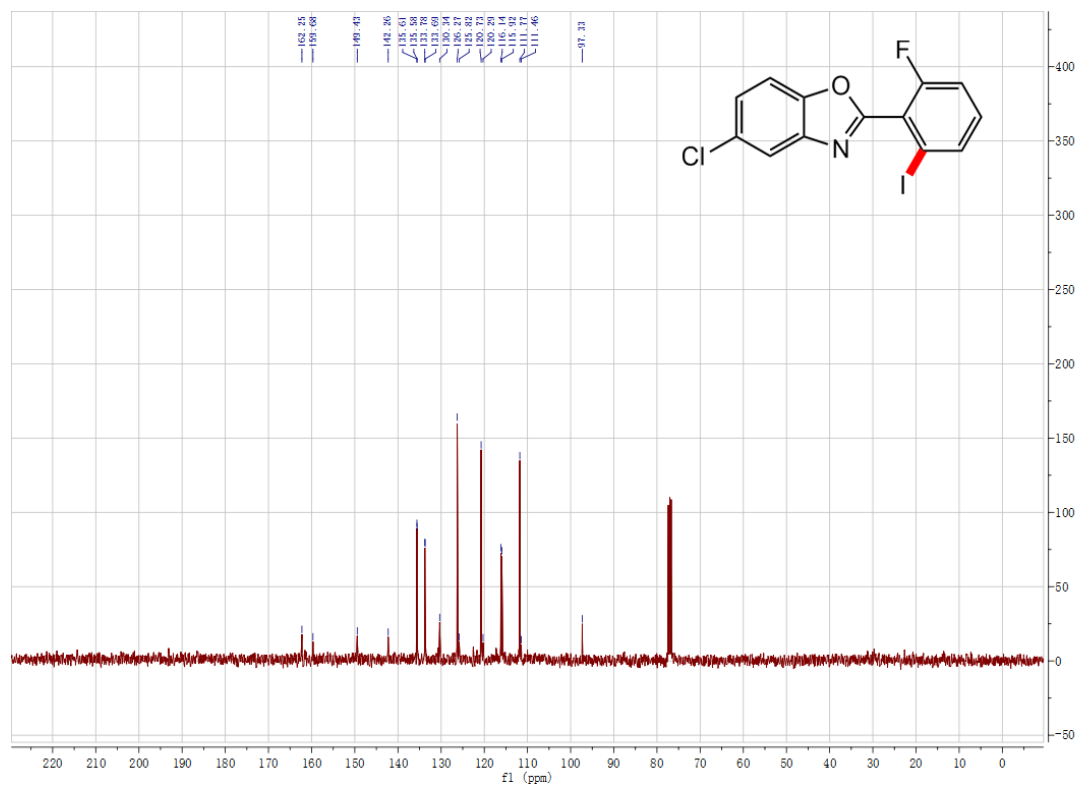

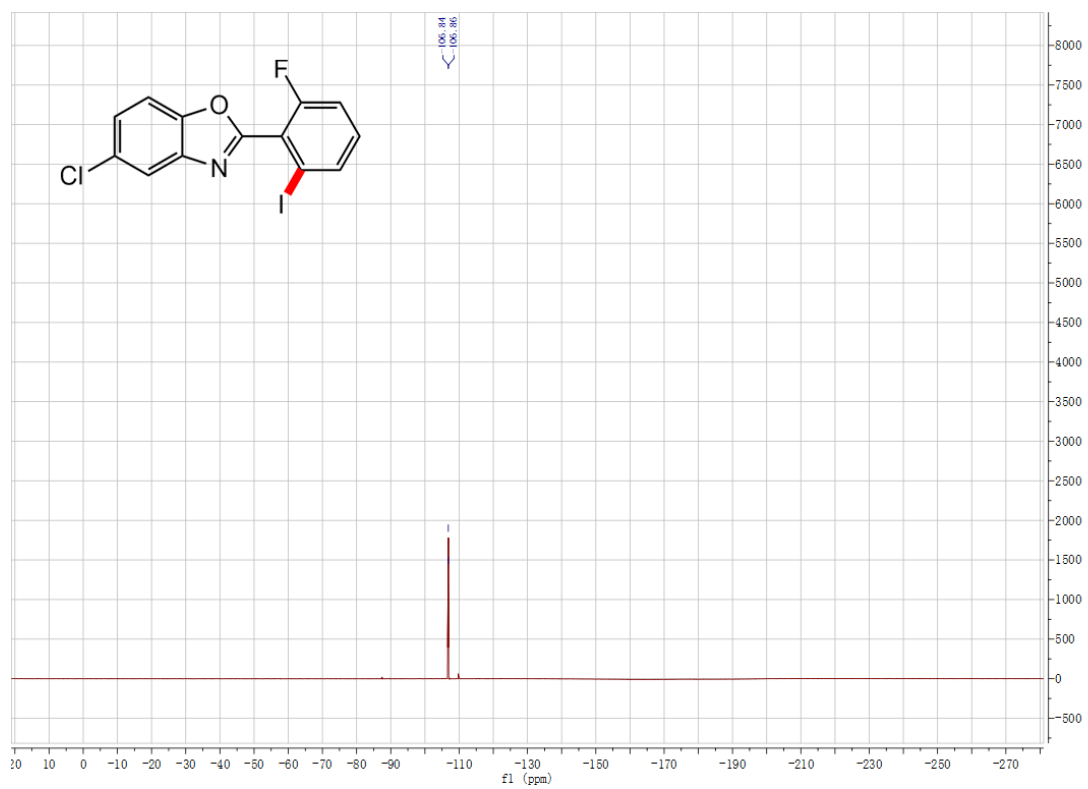

5-chloro-2-(2-iodo-6-methoxyphenyl)benzo[d]oxazole (3q)

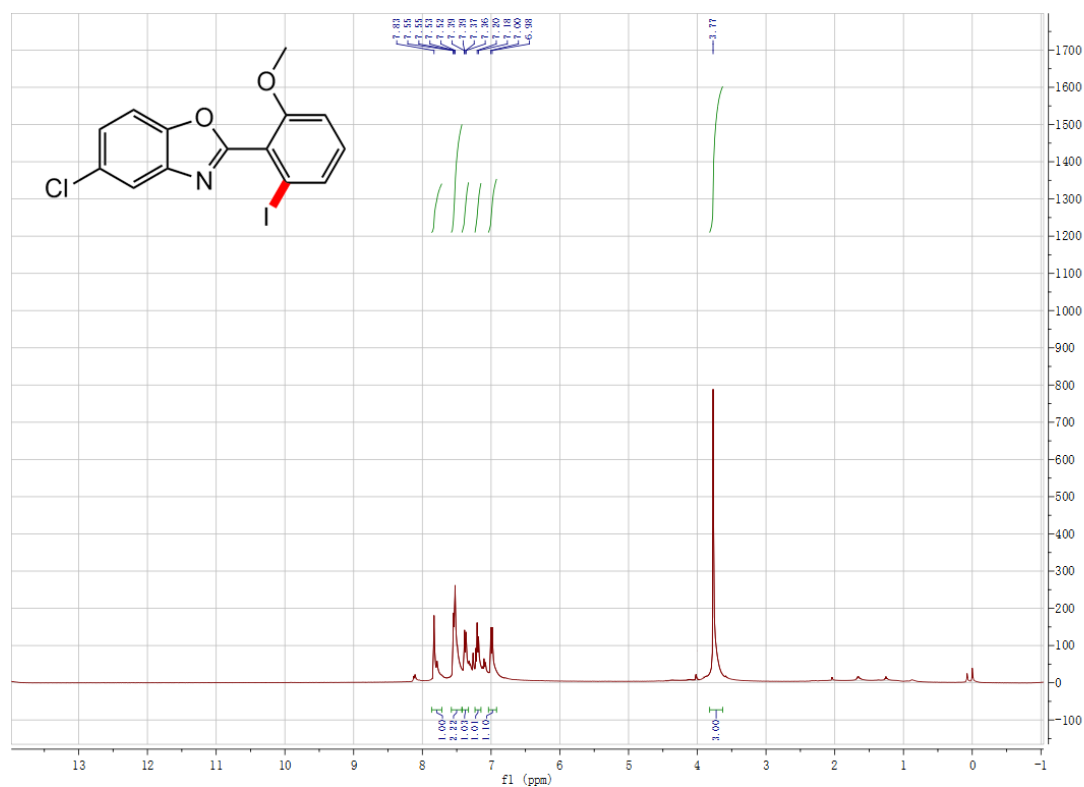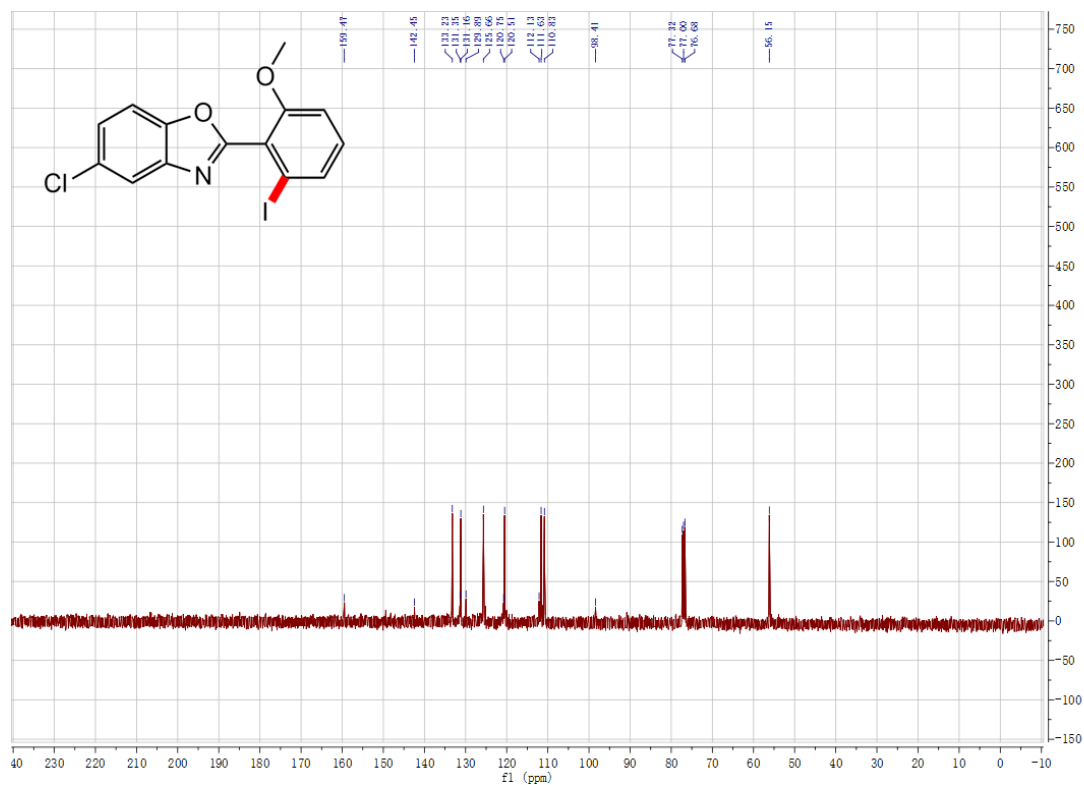

### 2-(2-iodo-6-methylphenyl)-5-methylbenzo[d]oxazole (3r)

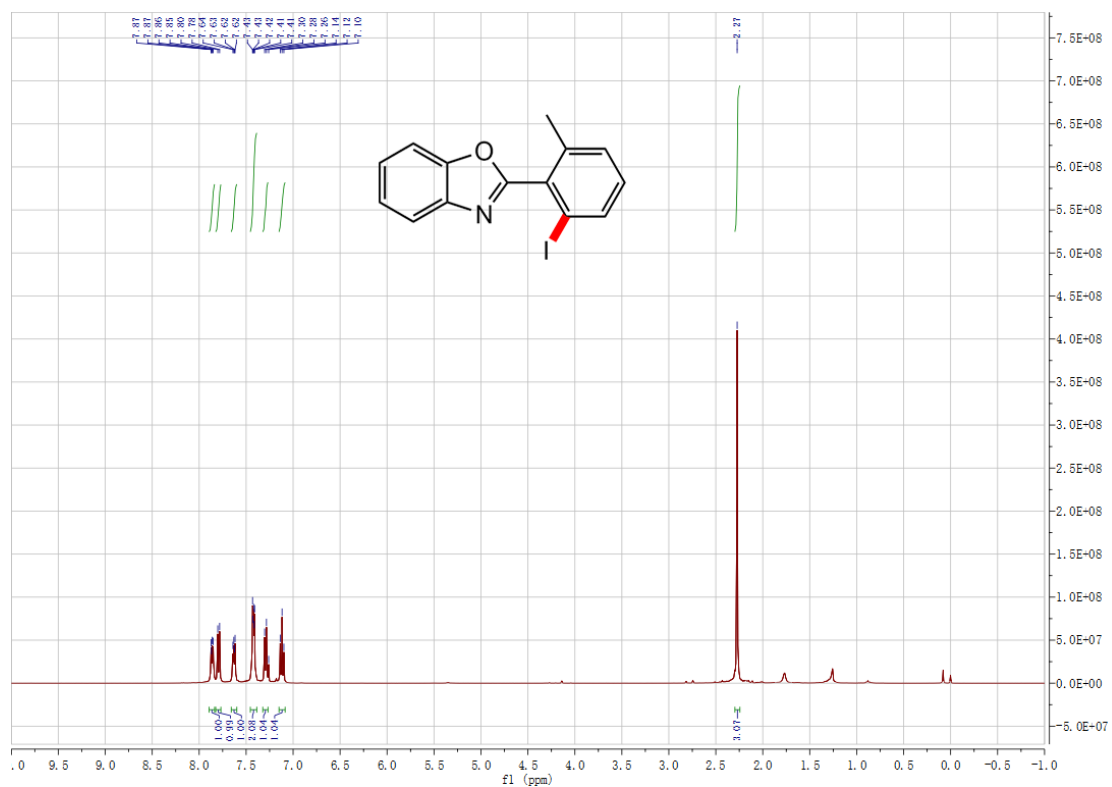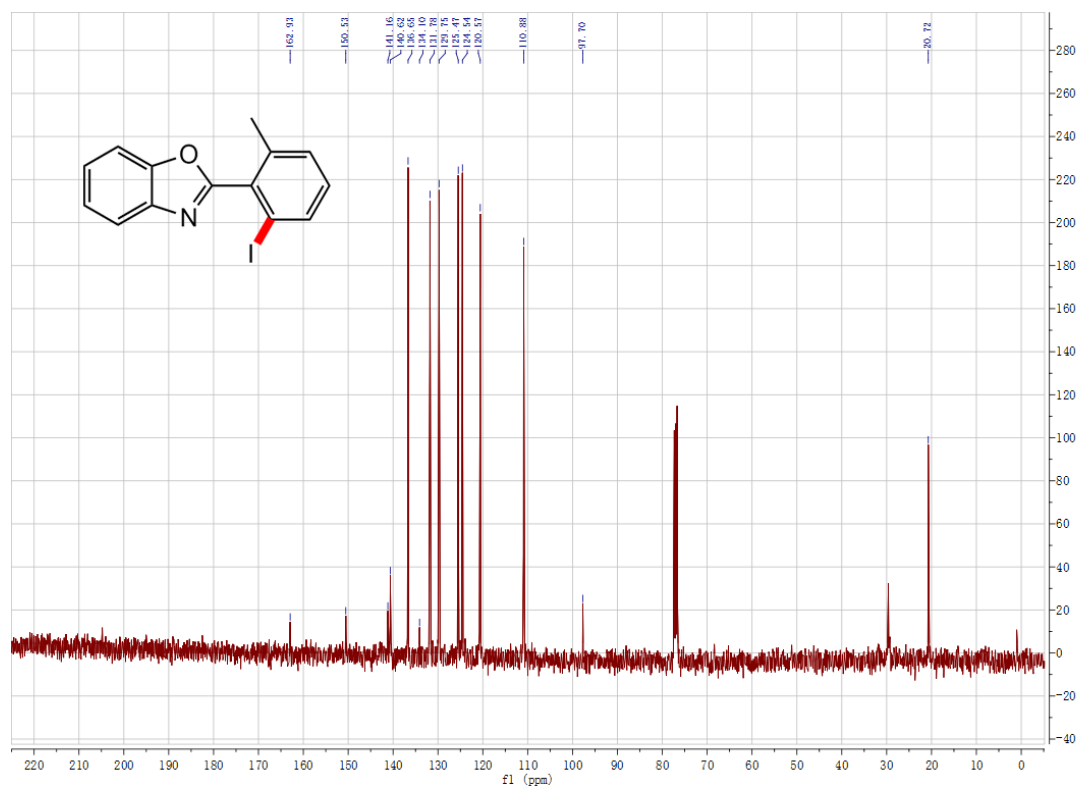

2-(2-fluoro-6-iodophenyl)benzo[d]oxazole (3s)

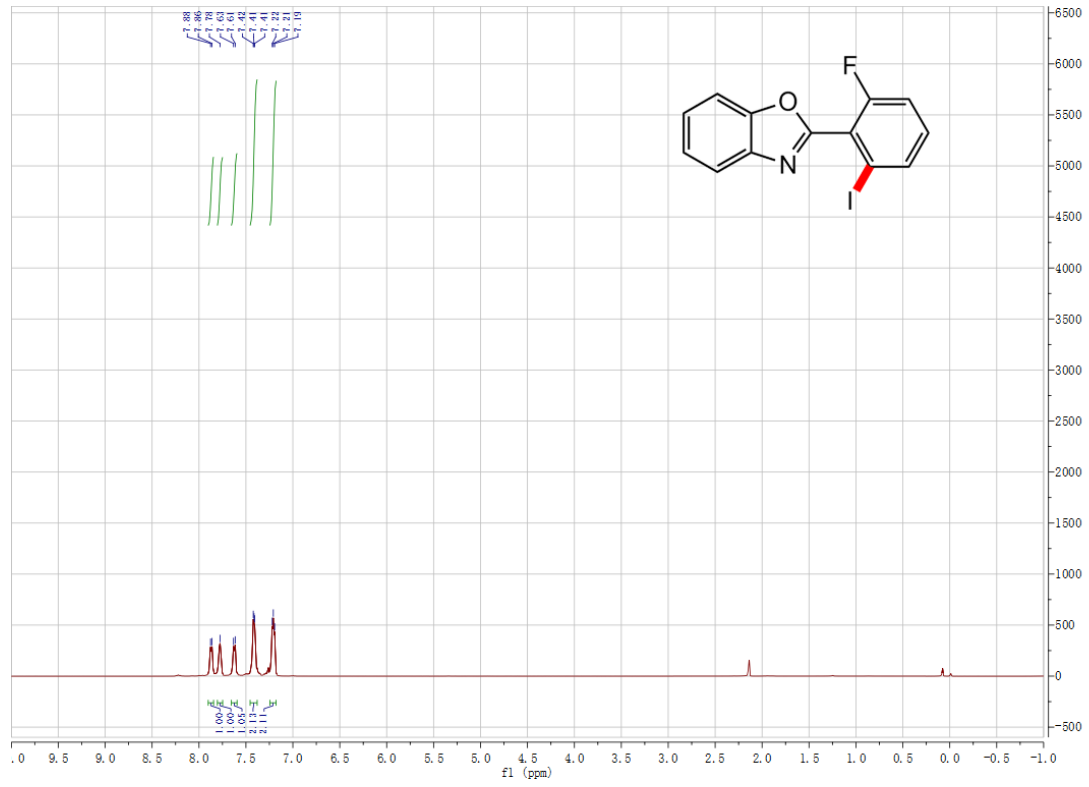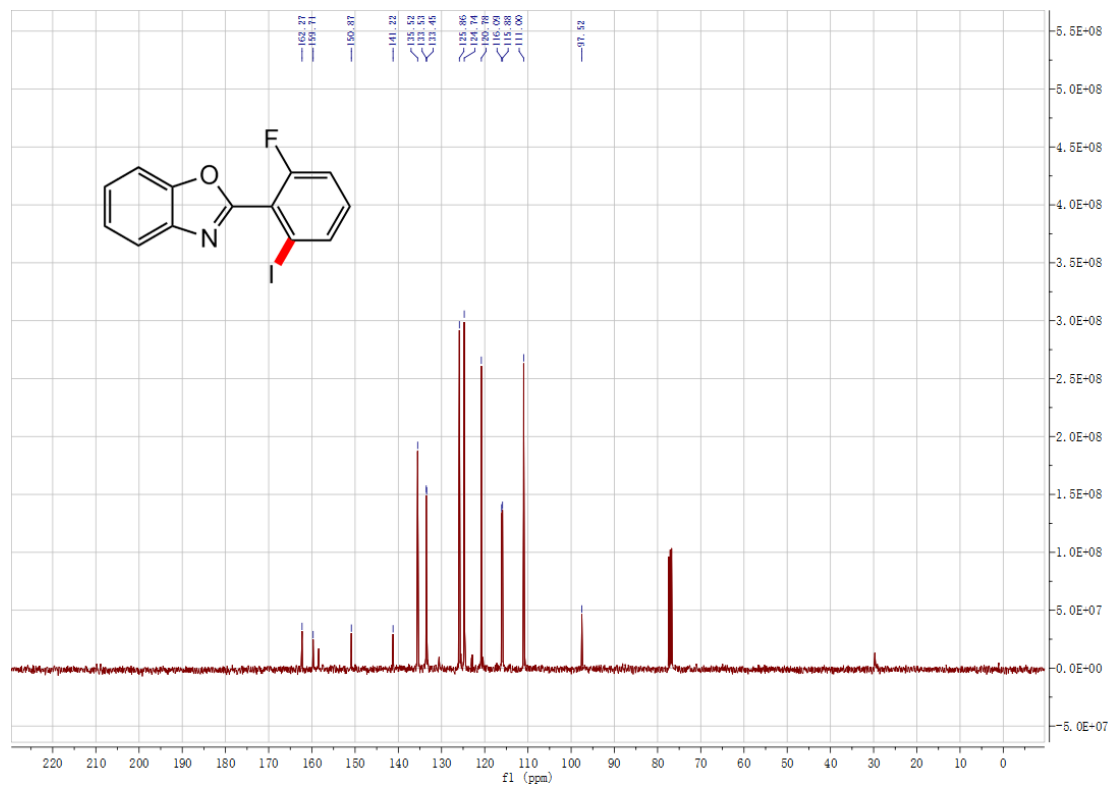



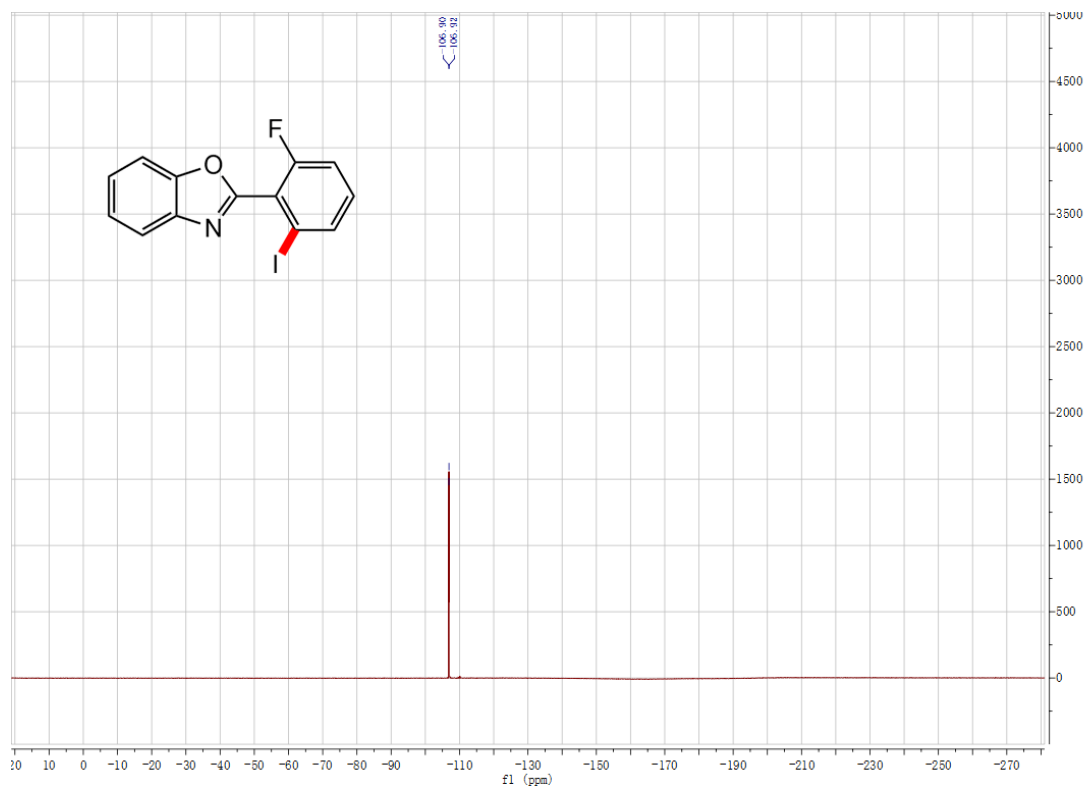

2-(2-iodo-6-methoxyphenyl)benzo[d]oxazole (3t)

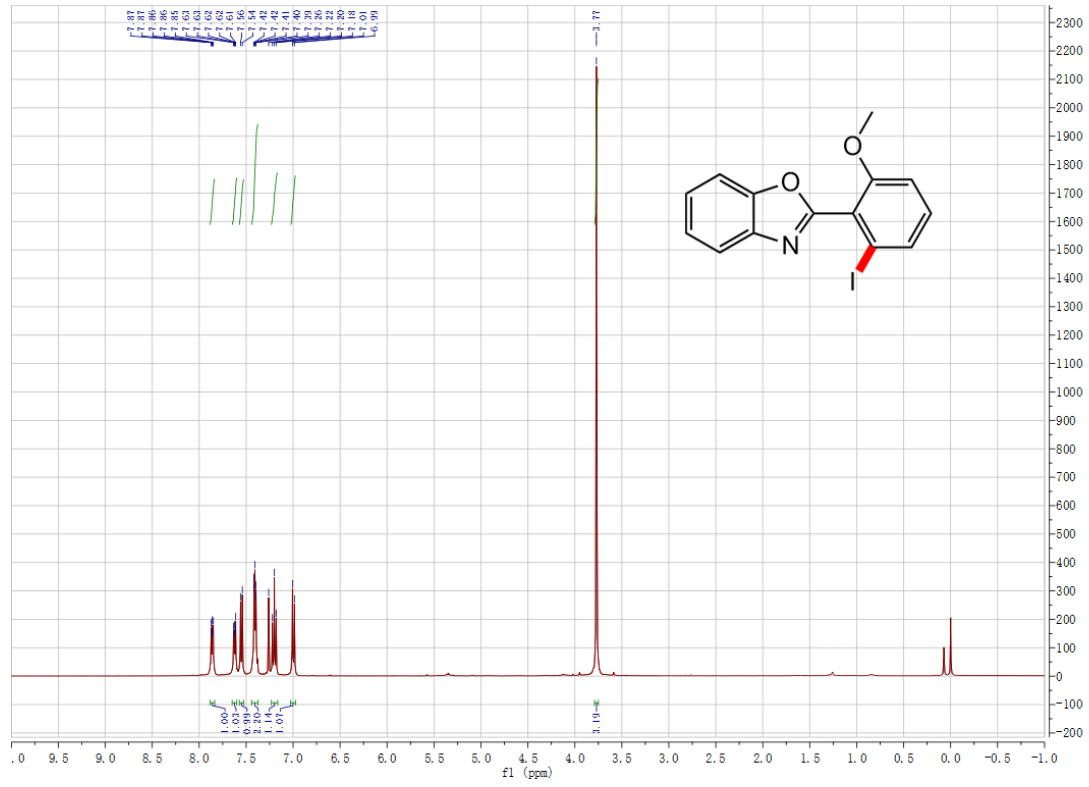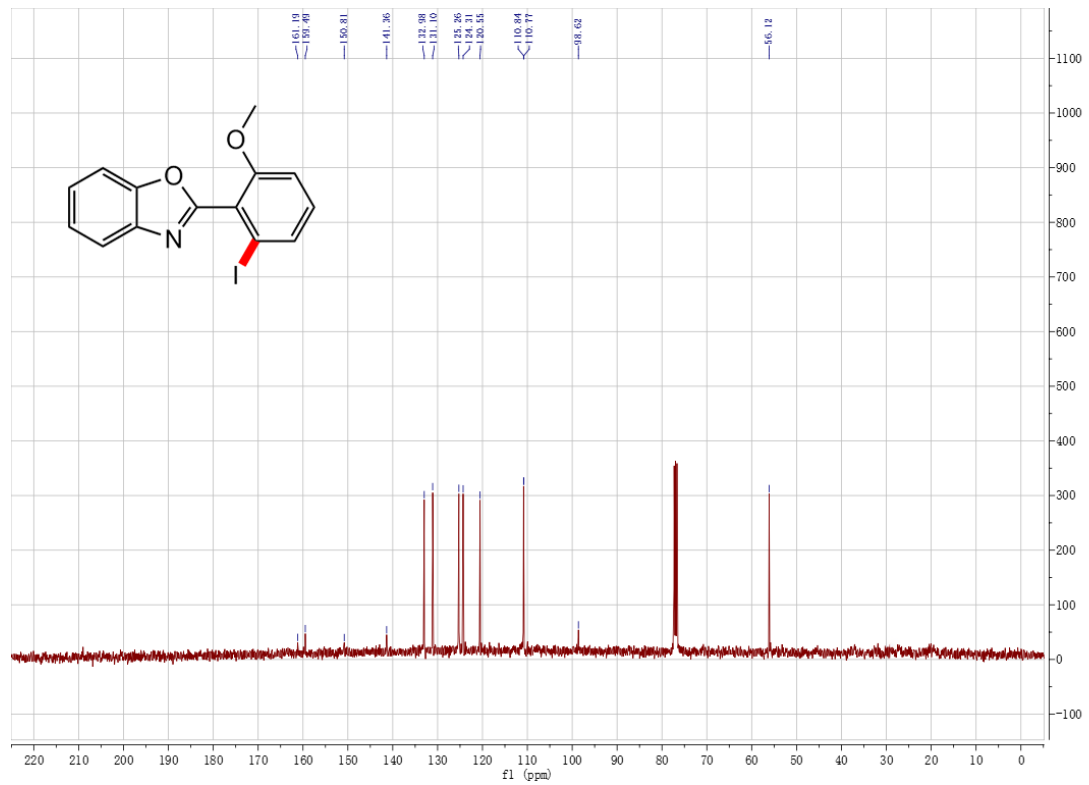



5-chloro-2-(4-chloro-2,6-diiodophenyl)benzo[d]oxazole (3v)

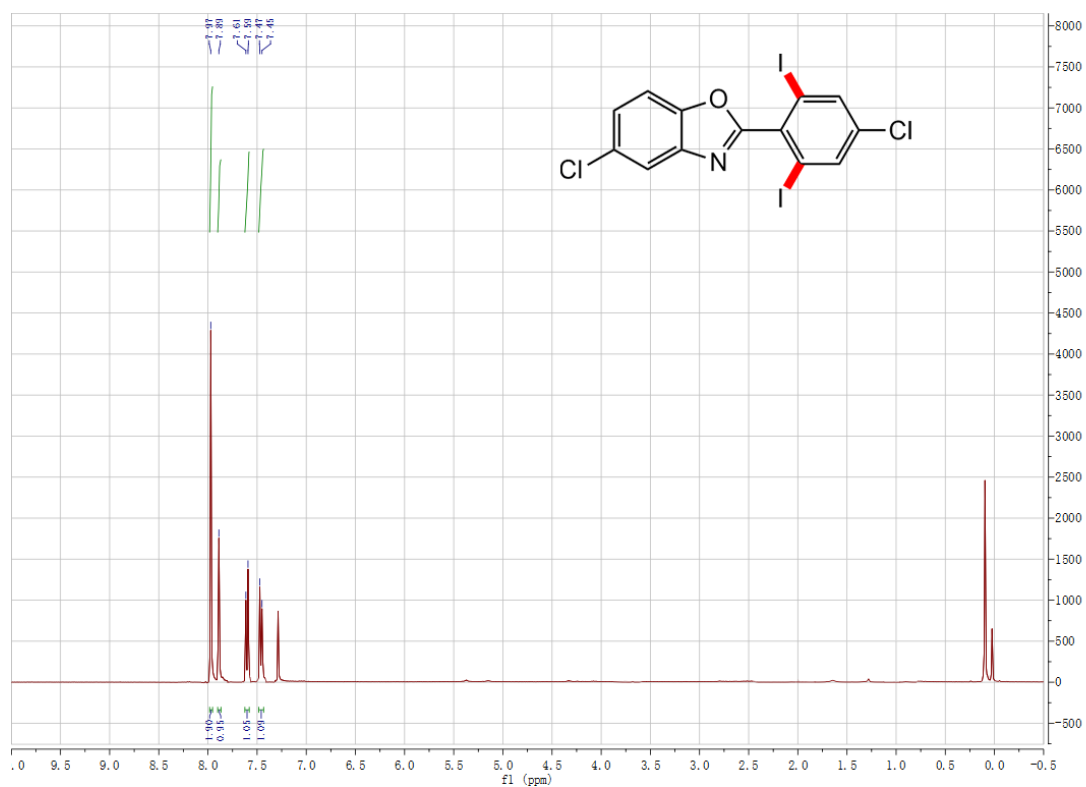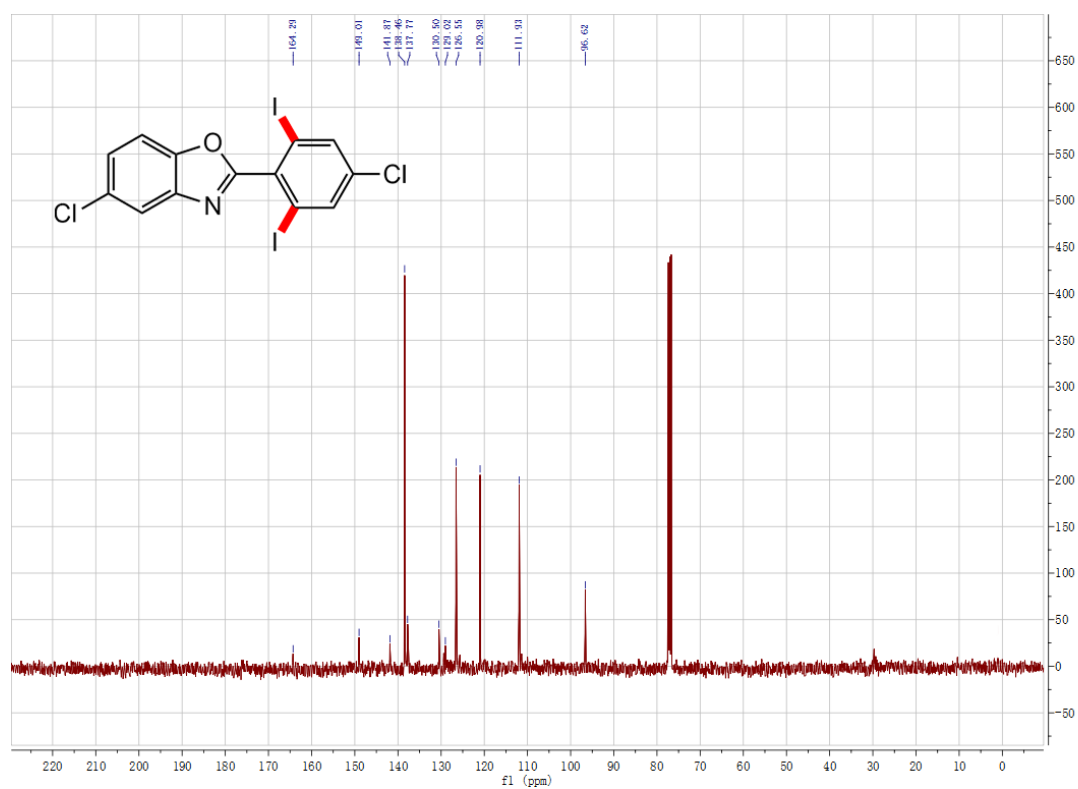

2-(2,6-diiodo-4-methylphenyl)benzo[d]oxazole (3w)

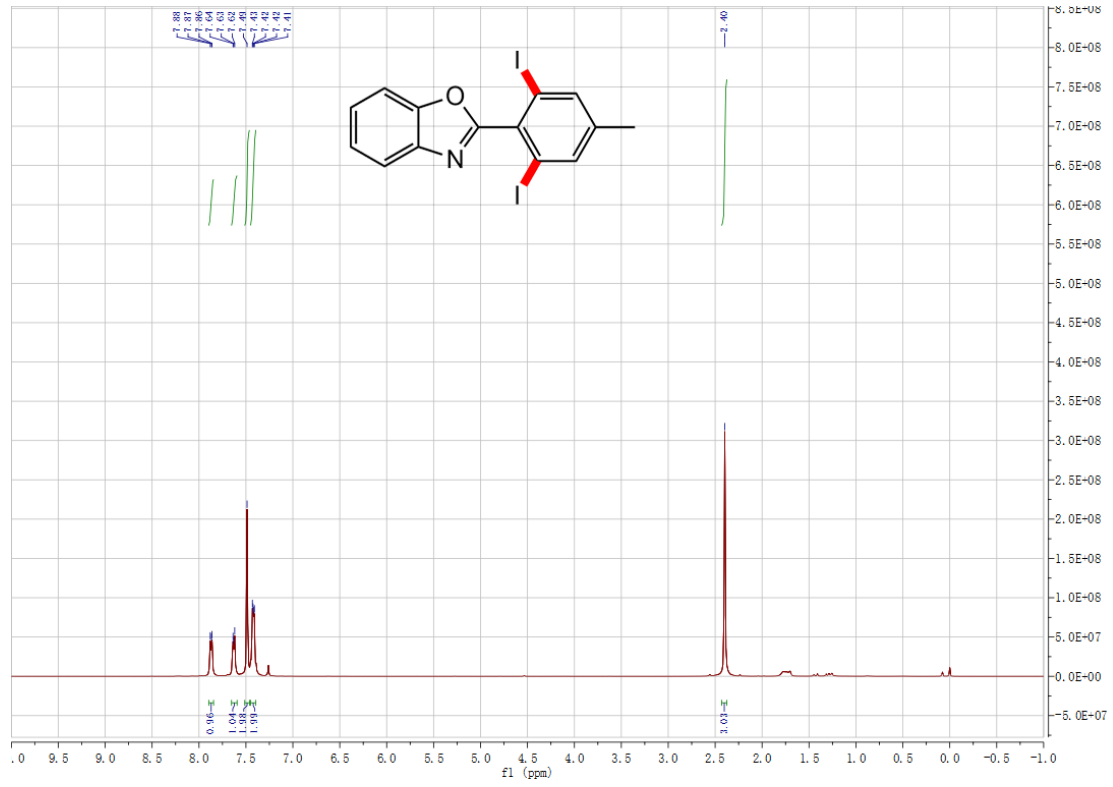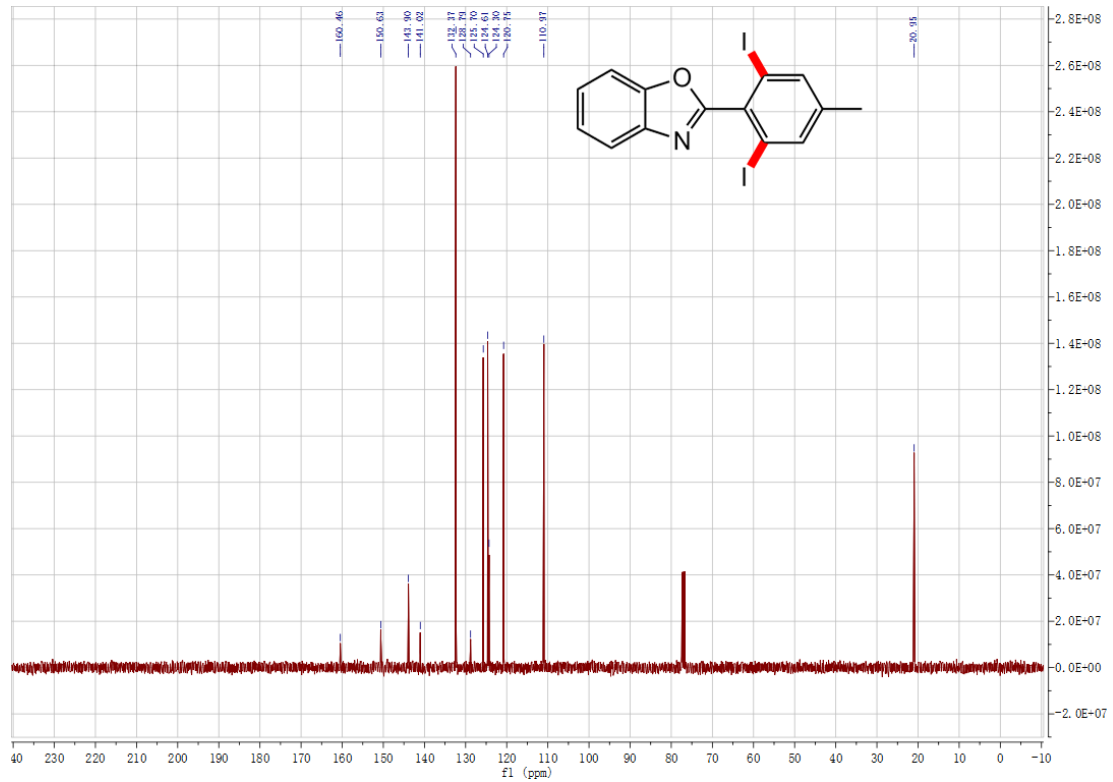

5-(*tert*-butyl)-2-(2,6-diiodo-4-methylphenyl)benzo[*d*]oxazole (3x)

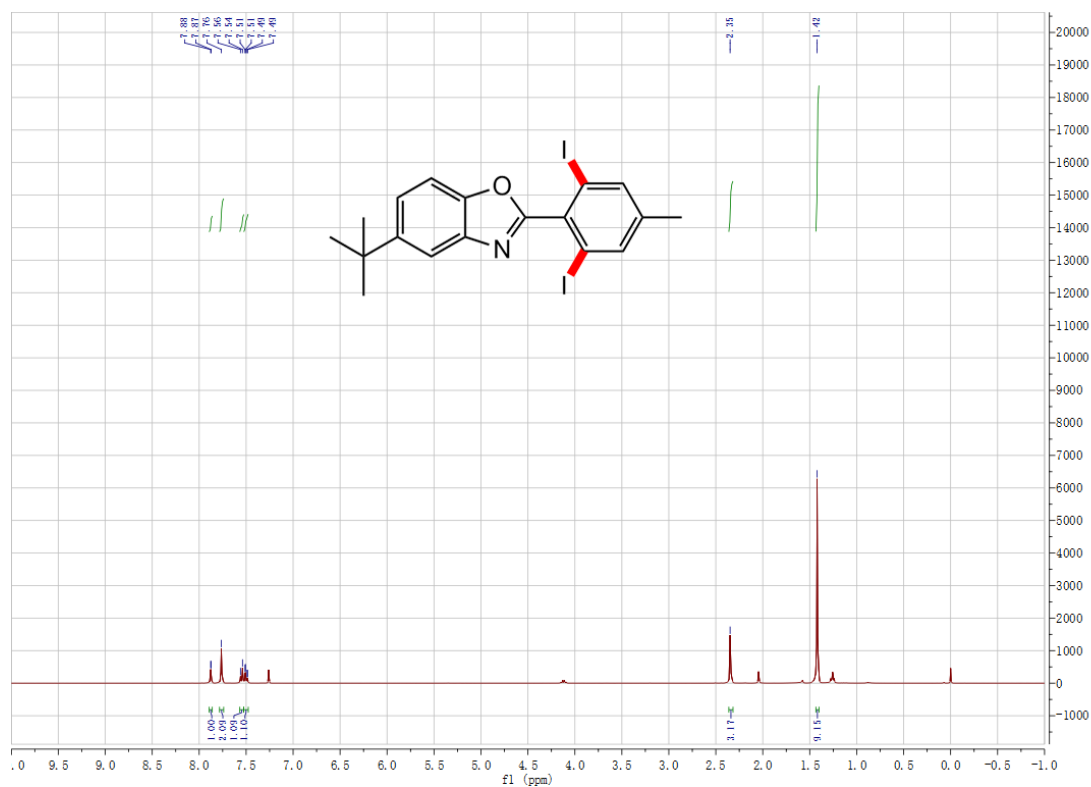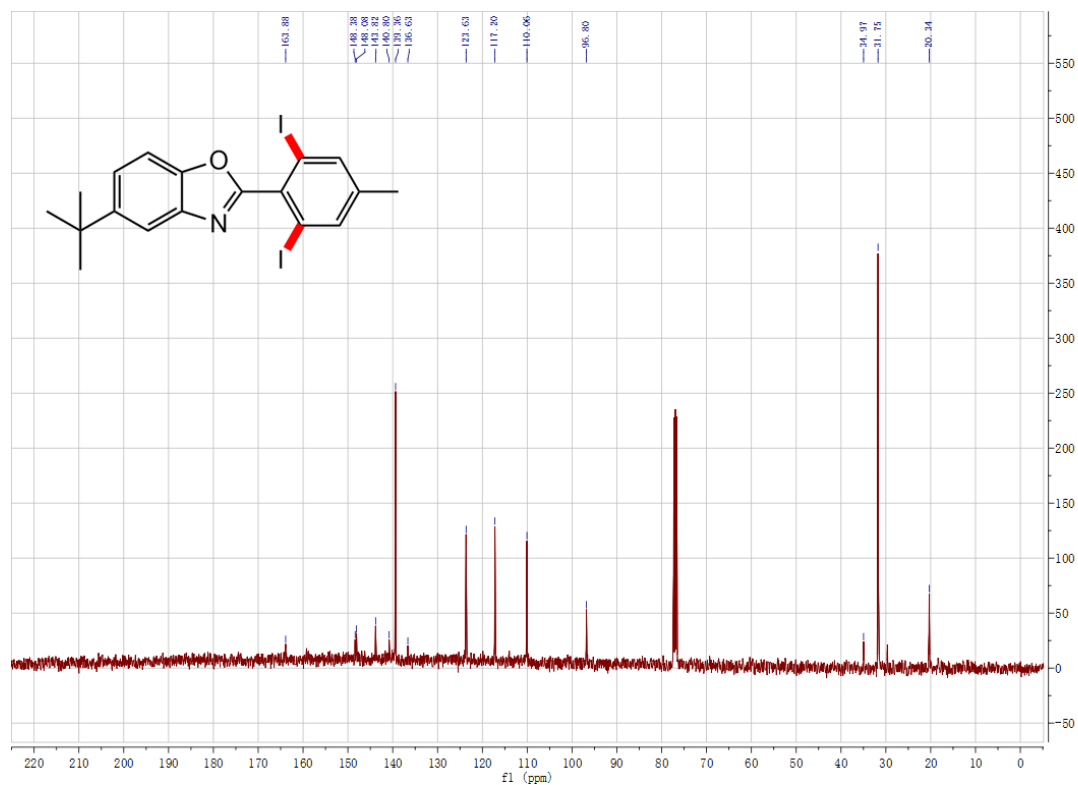

7-bromo-5-methyl-2-(o-tolyl)benzo[d]oxazole (5a)

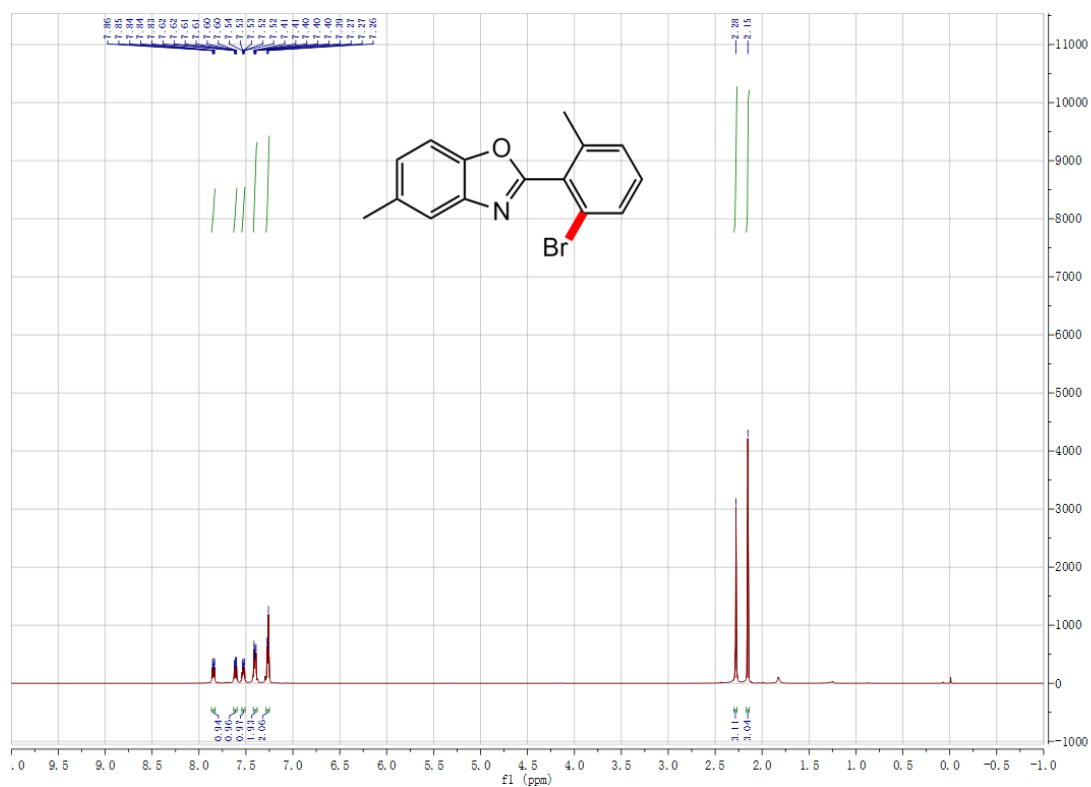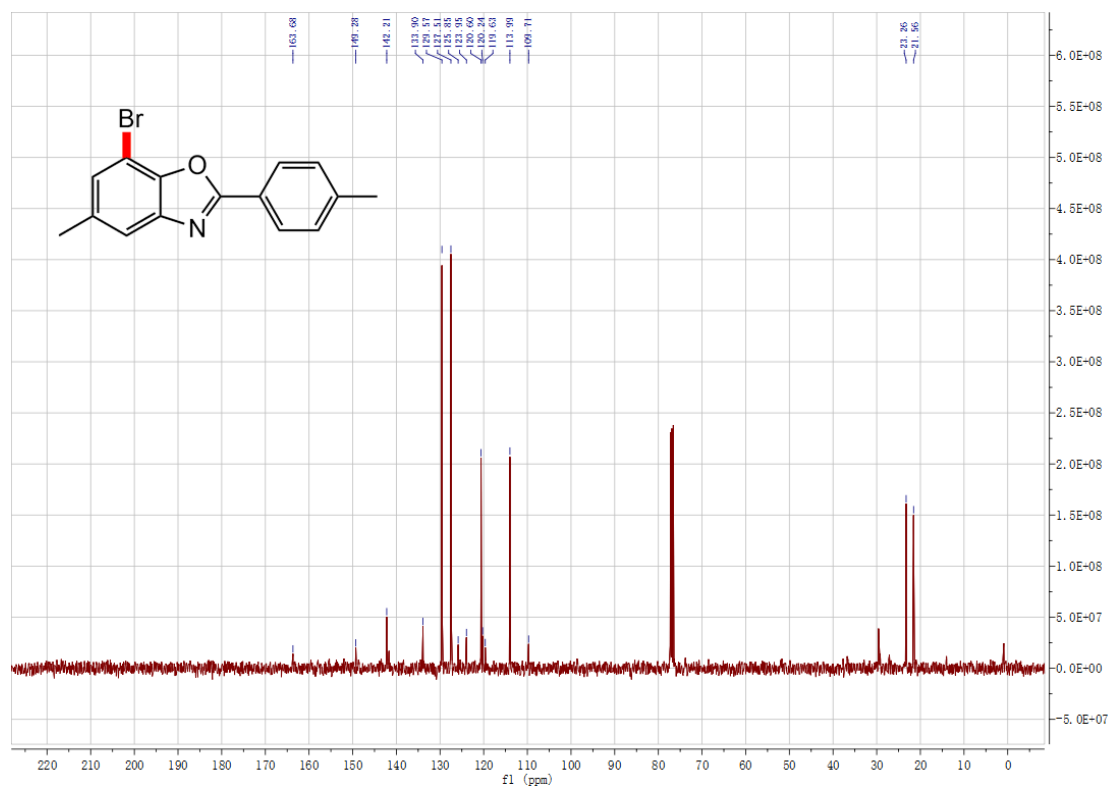

# 7-bromo-2-(2-fluorophenyl)-5-methylbenzo[d]oxazole (5b)

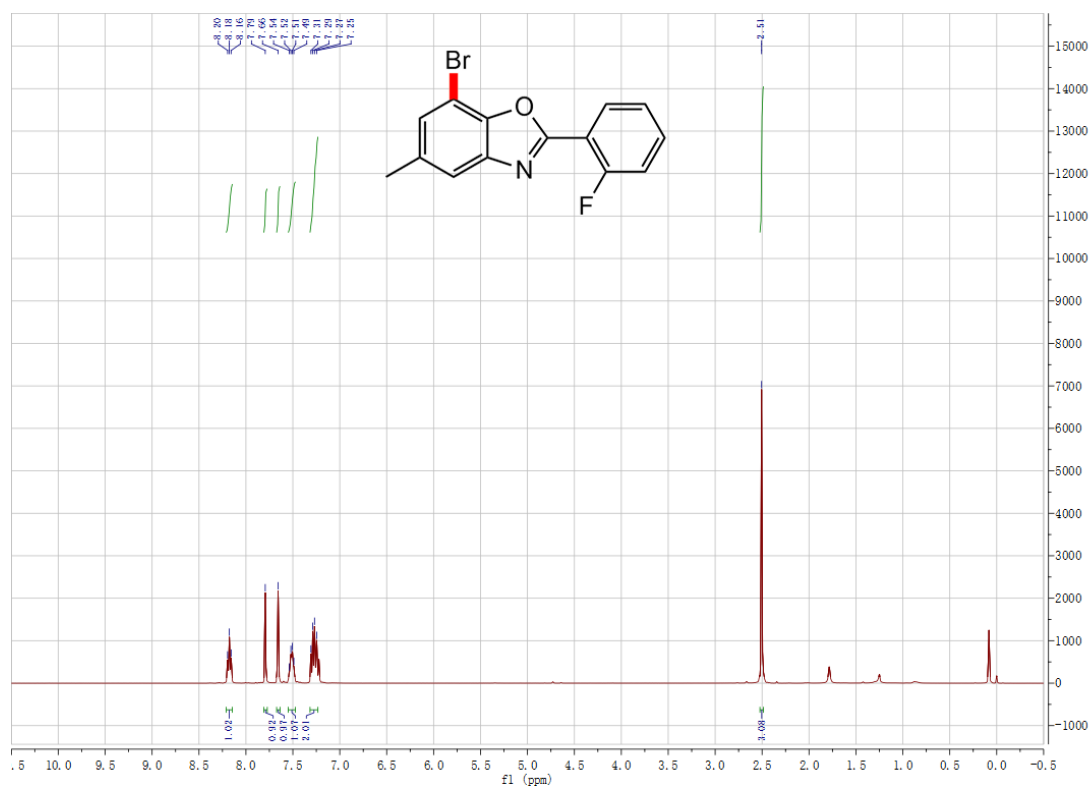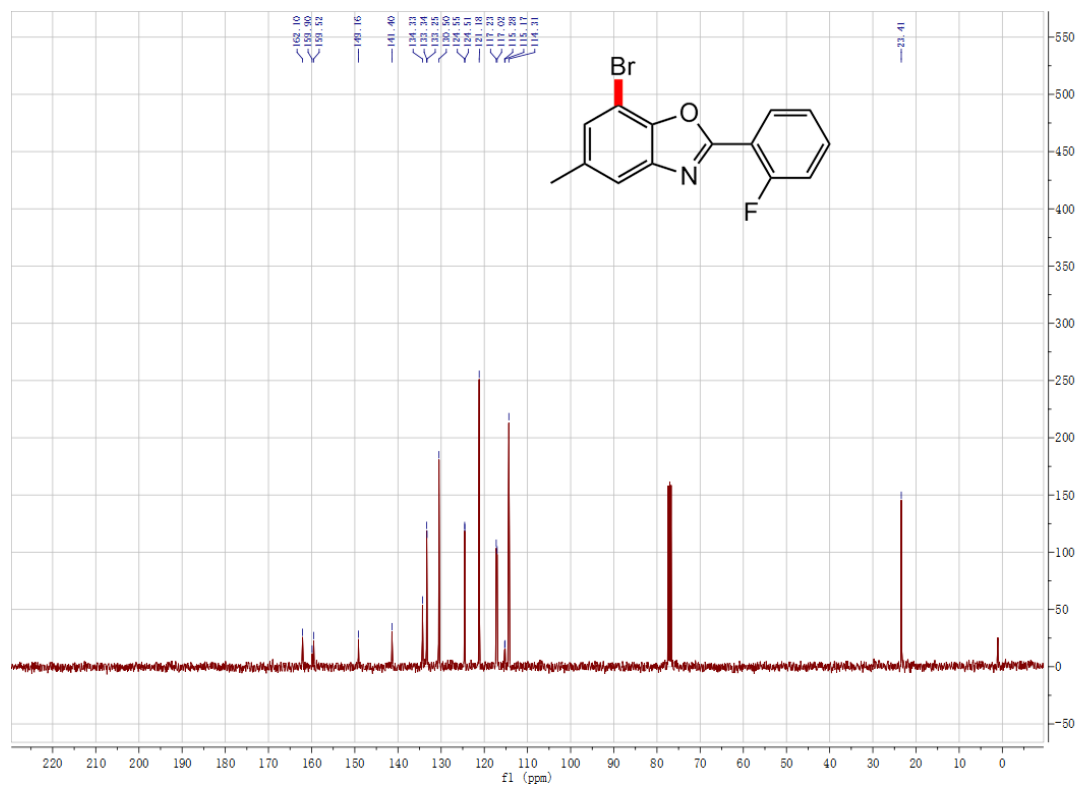



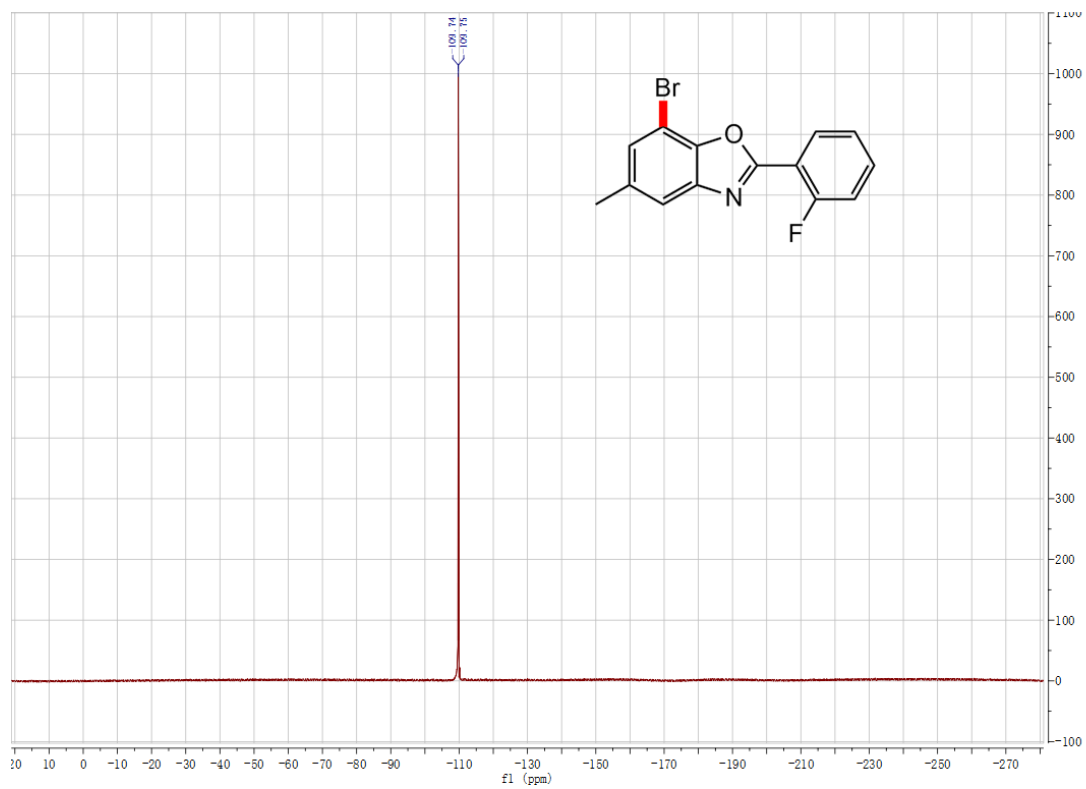

# 7-bromo-2-(2-chlorophenyl)-5-methylbenzo[d]oxazole (5c)

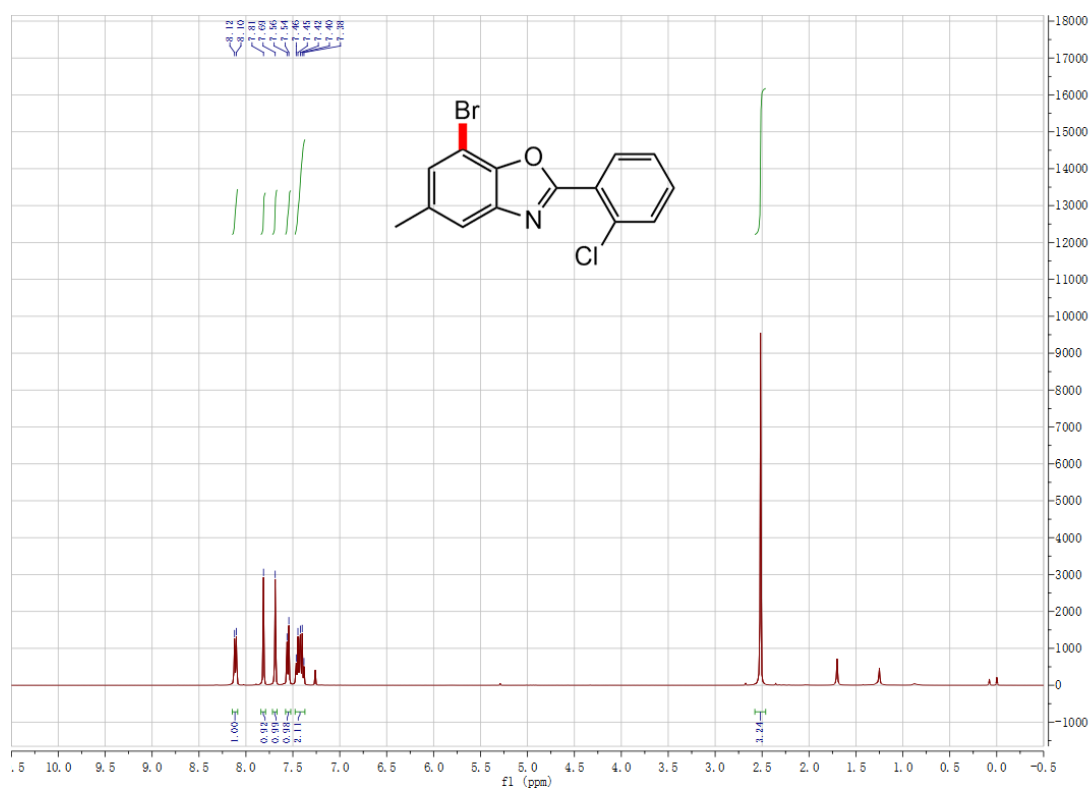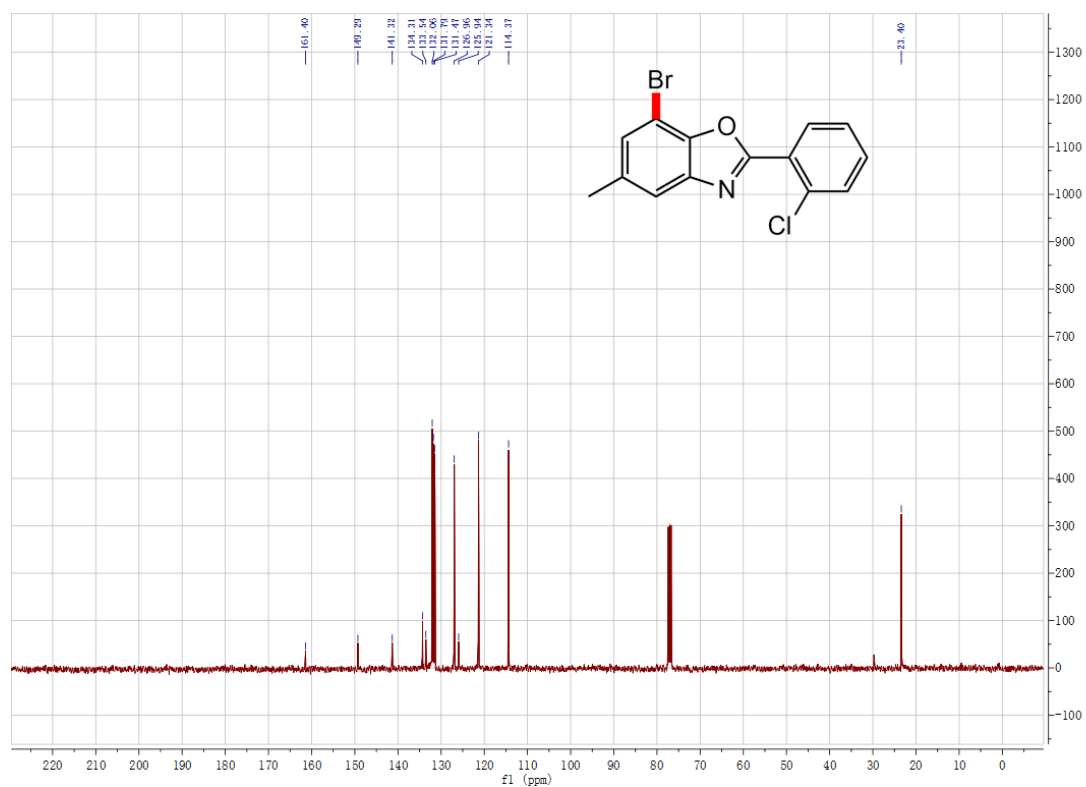

# 7-bromo-2-phenylbenzo[d]oxazole (5d)

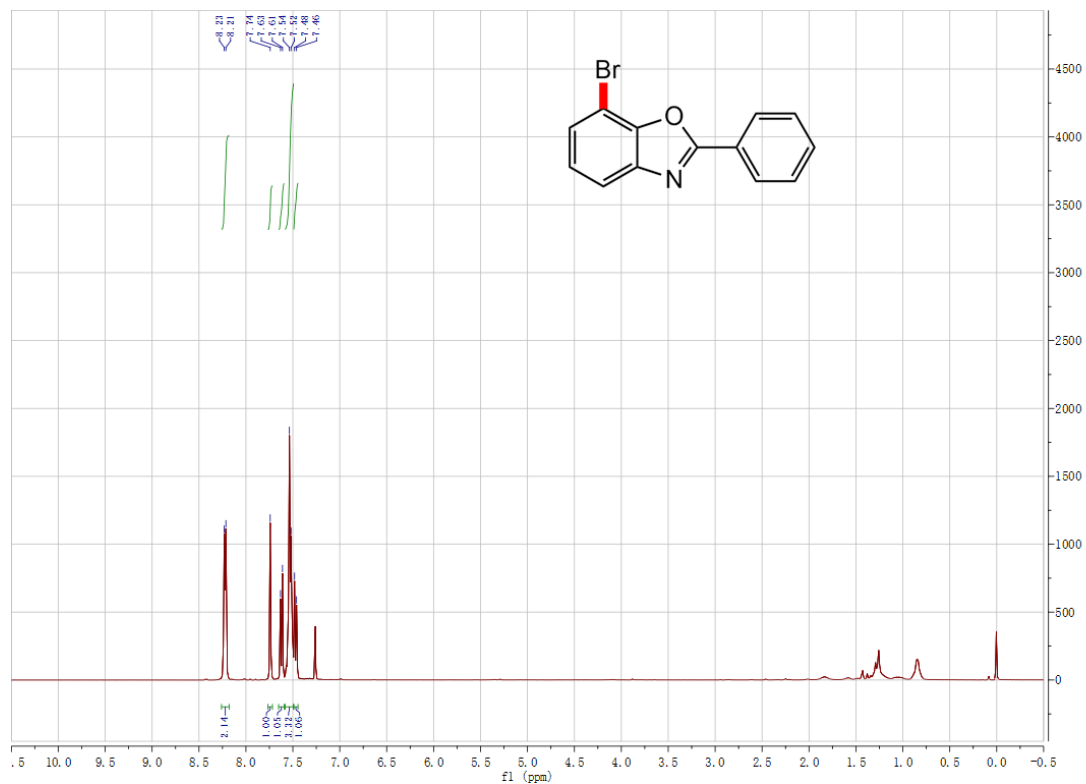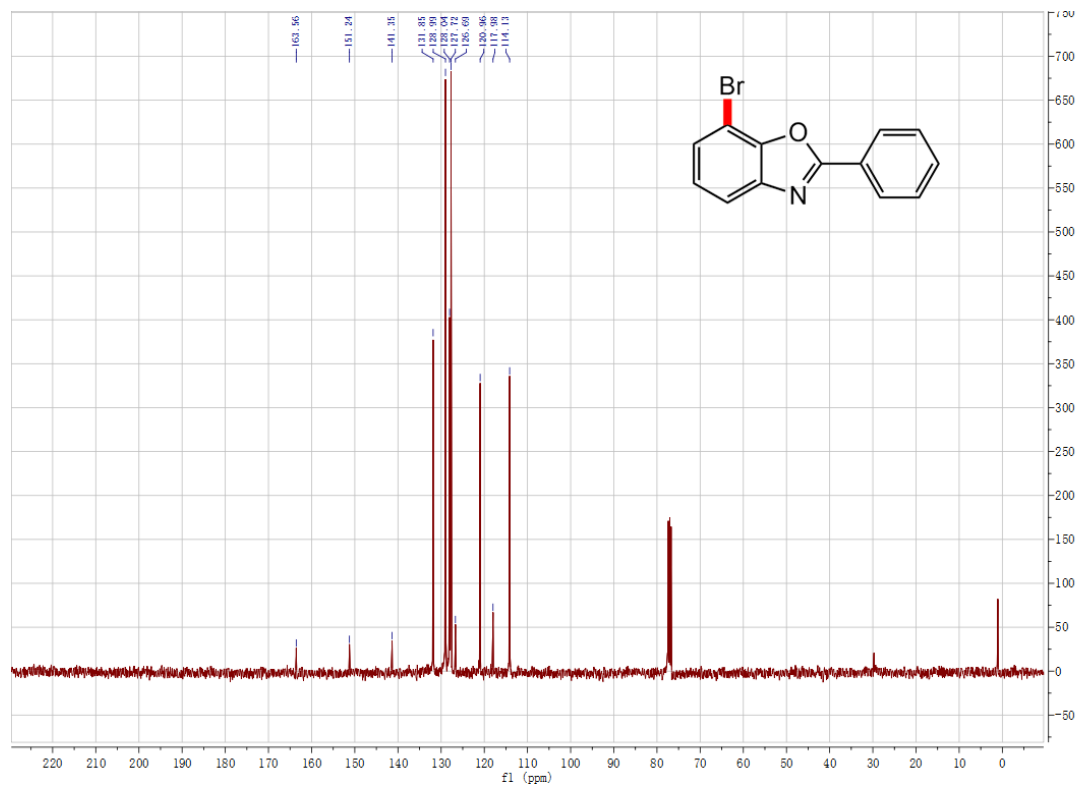

# 7-bromo-5-methyl-2-phenylbenzo[d]oxazole (5e)

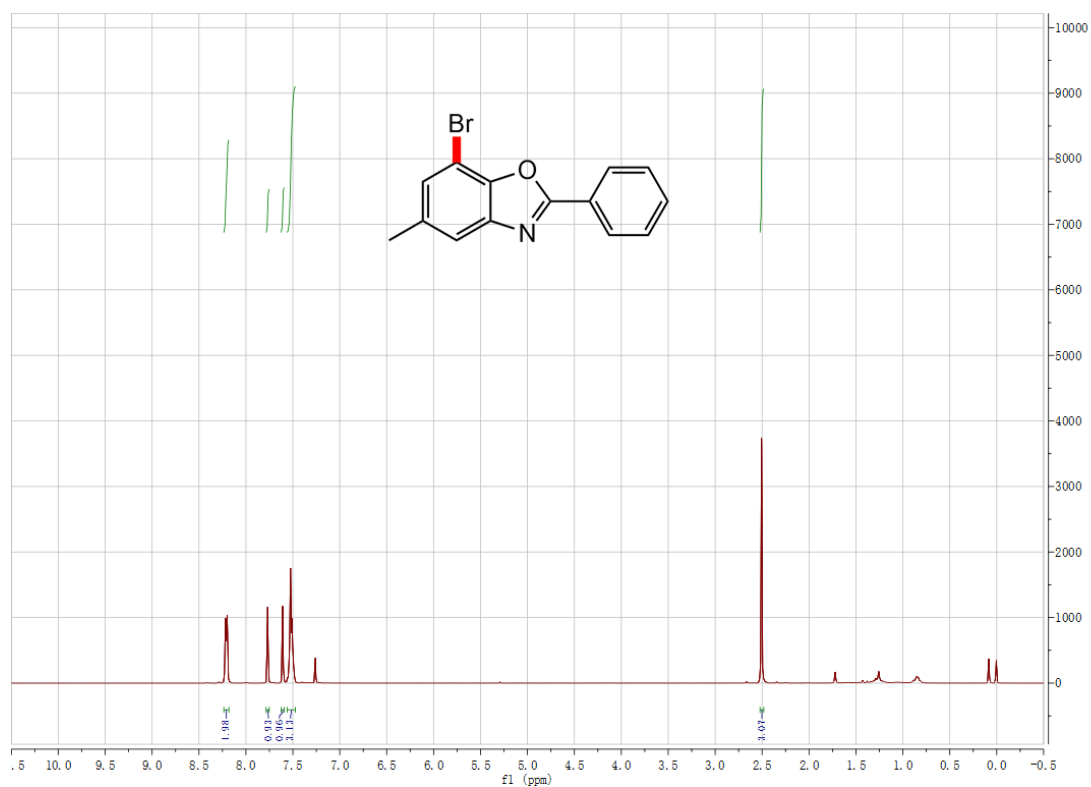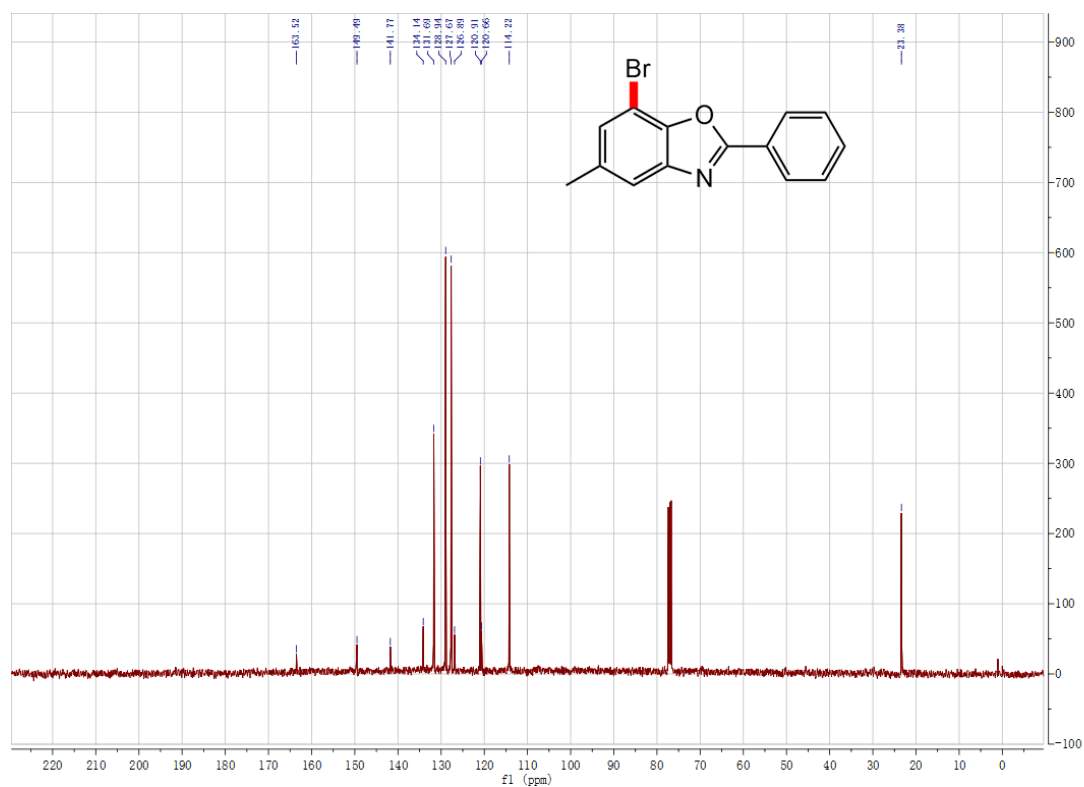

# 7-bromo-5-chloro-2-phenylbenzo[d]oxazole (5f)

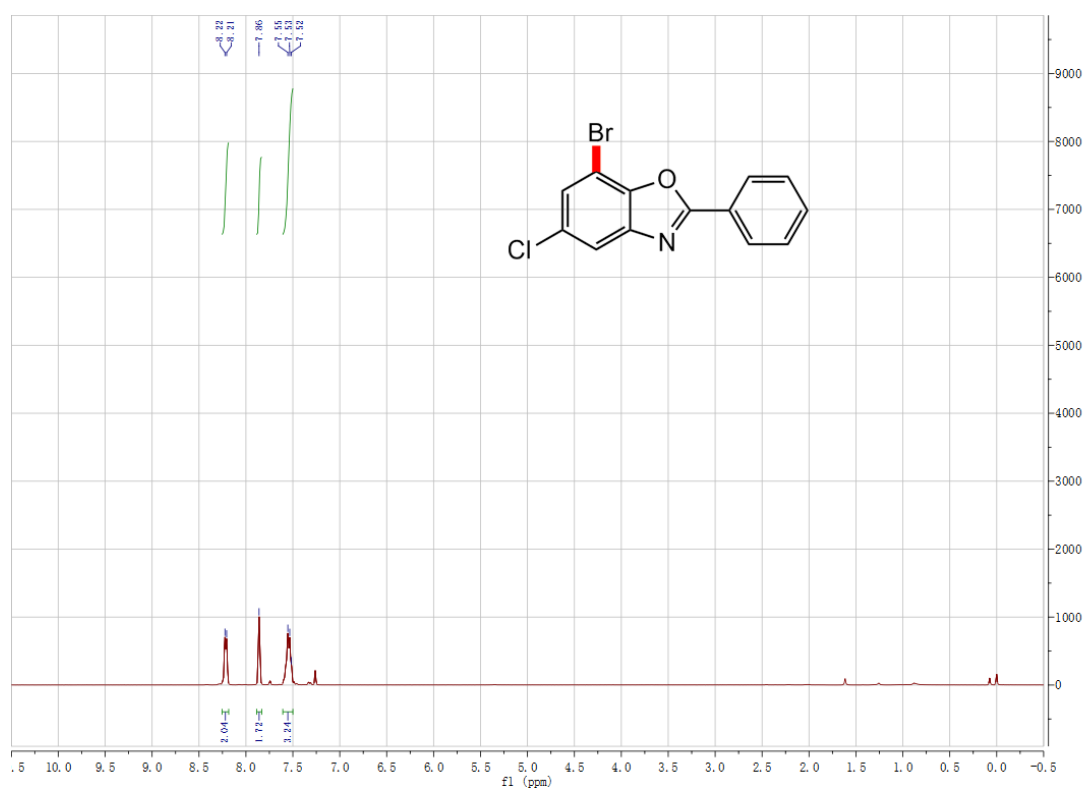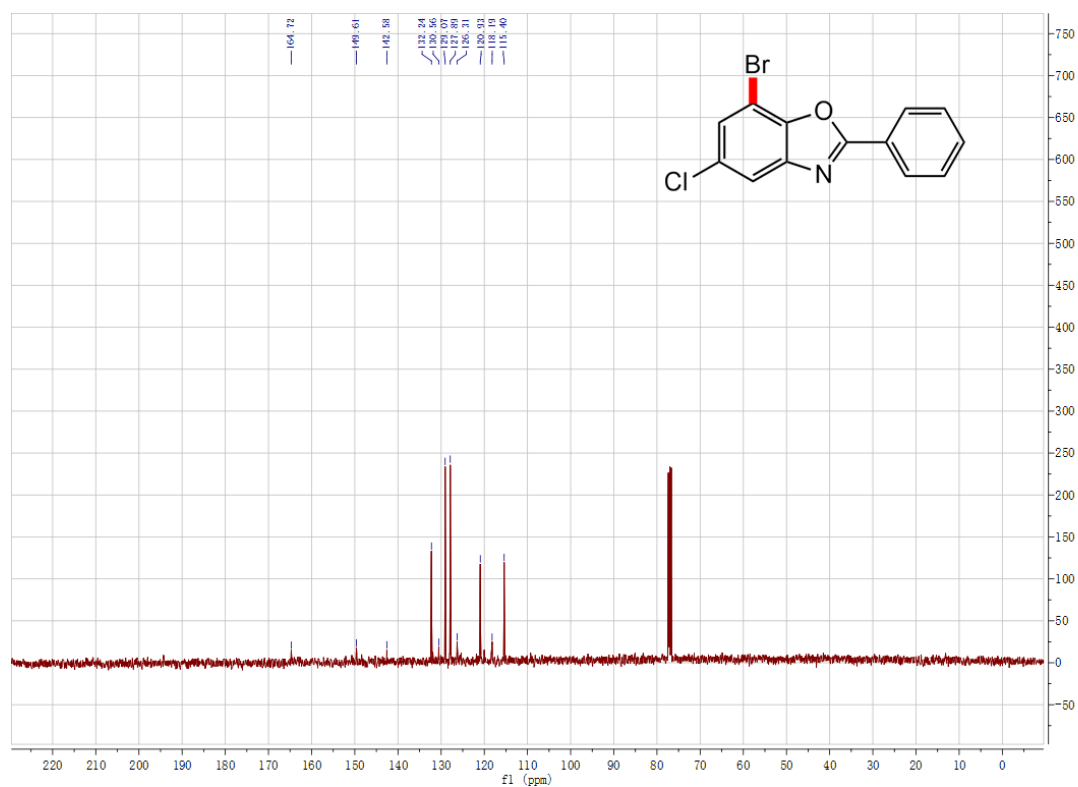



7-bromo-5-methyl-2-(*m*-tolyl)benzo[*d*]oxazole (5h)

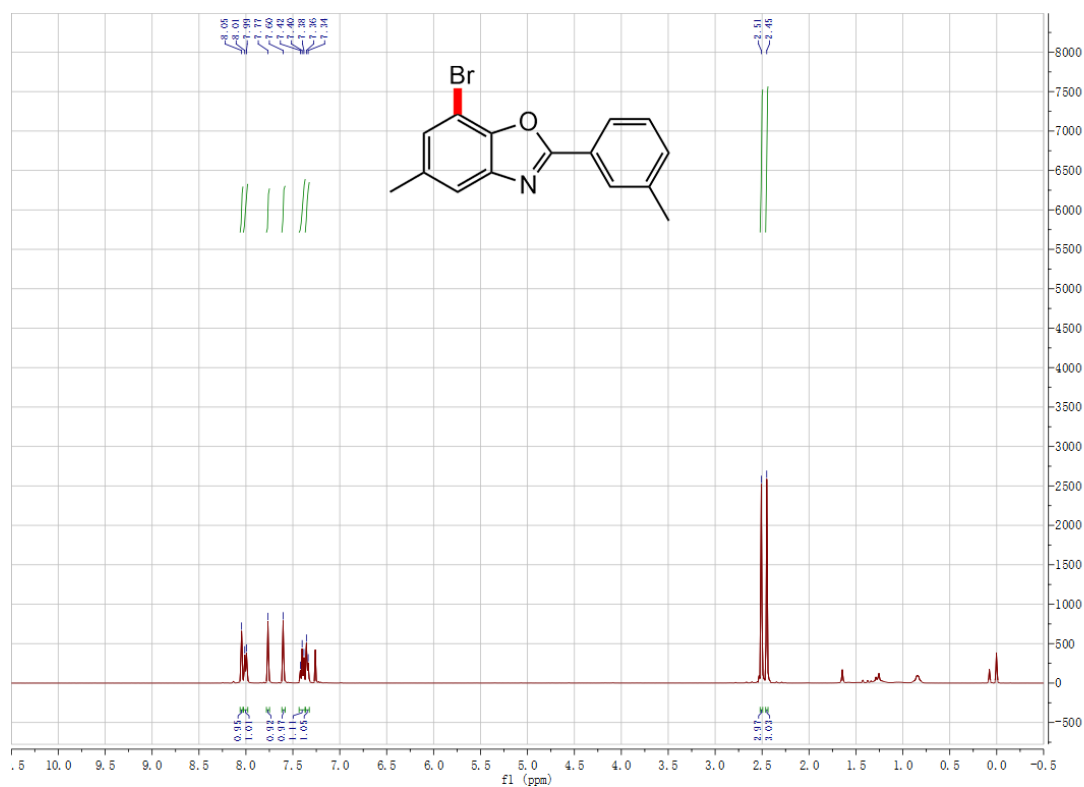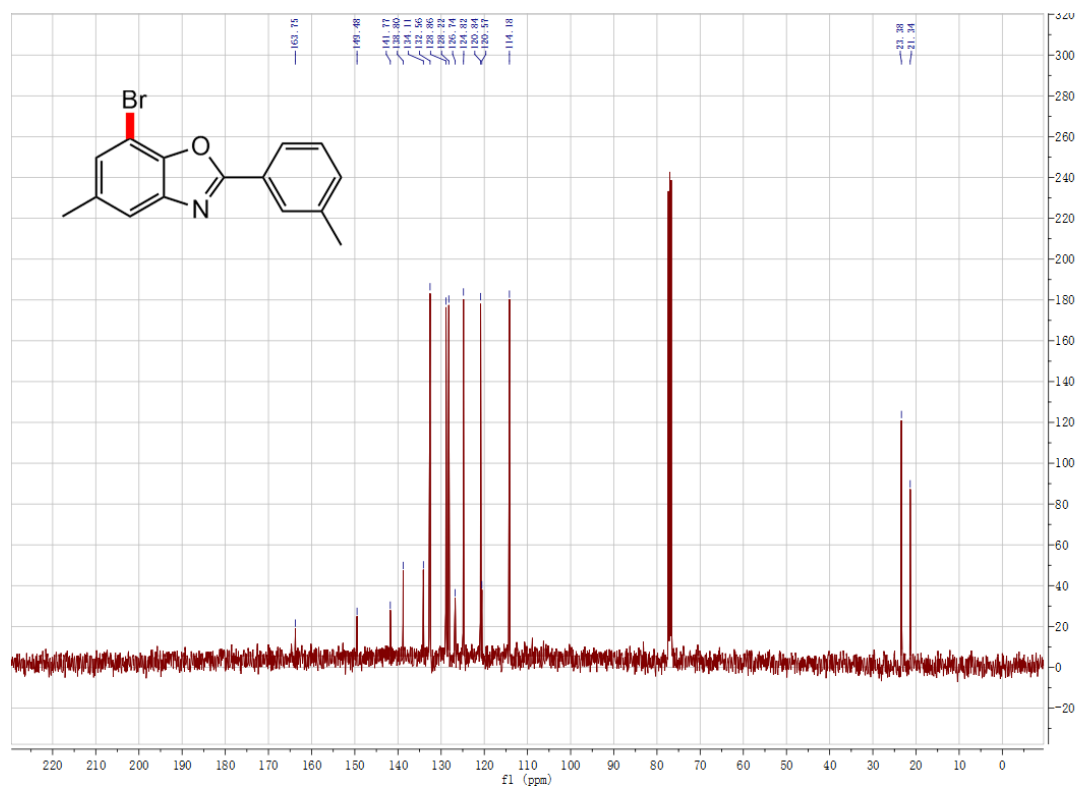

7-bromo-5-methyl-2-(p-tolyl)benzo[d]oxazole (5i)

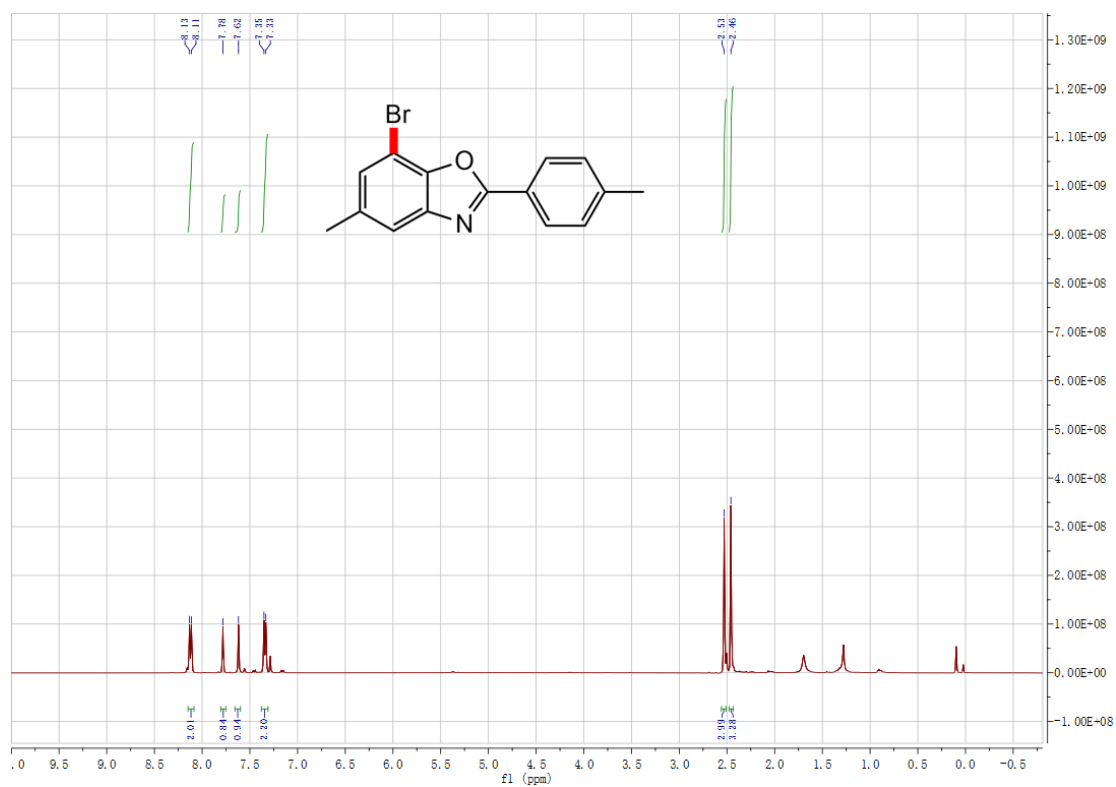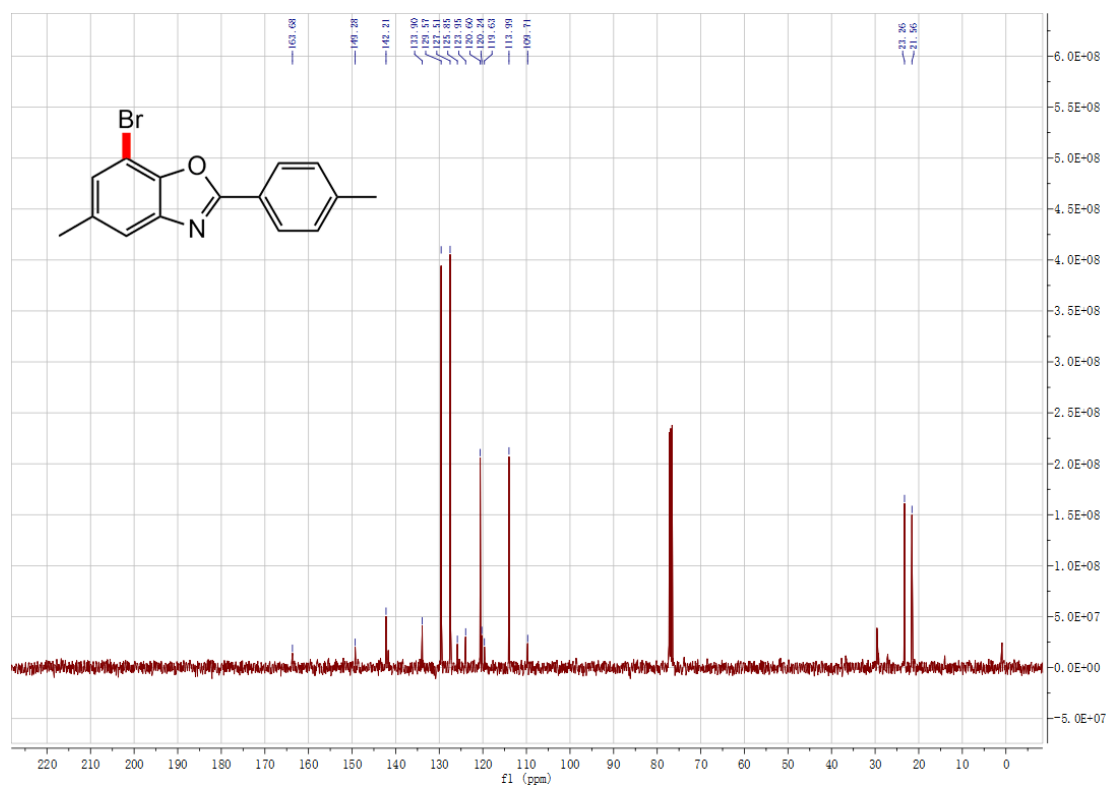



### 7-bromo-2-(4-methoxyphenyl)-5-methylbenzo[d]oxazole (5j)

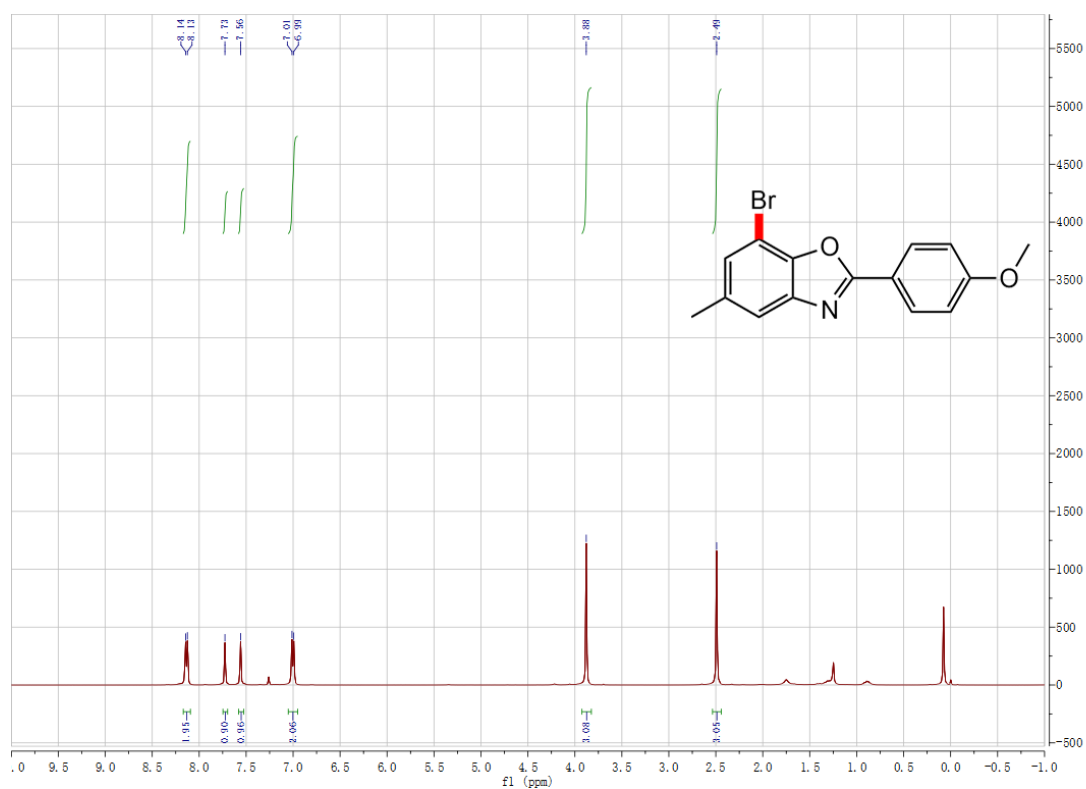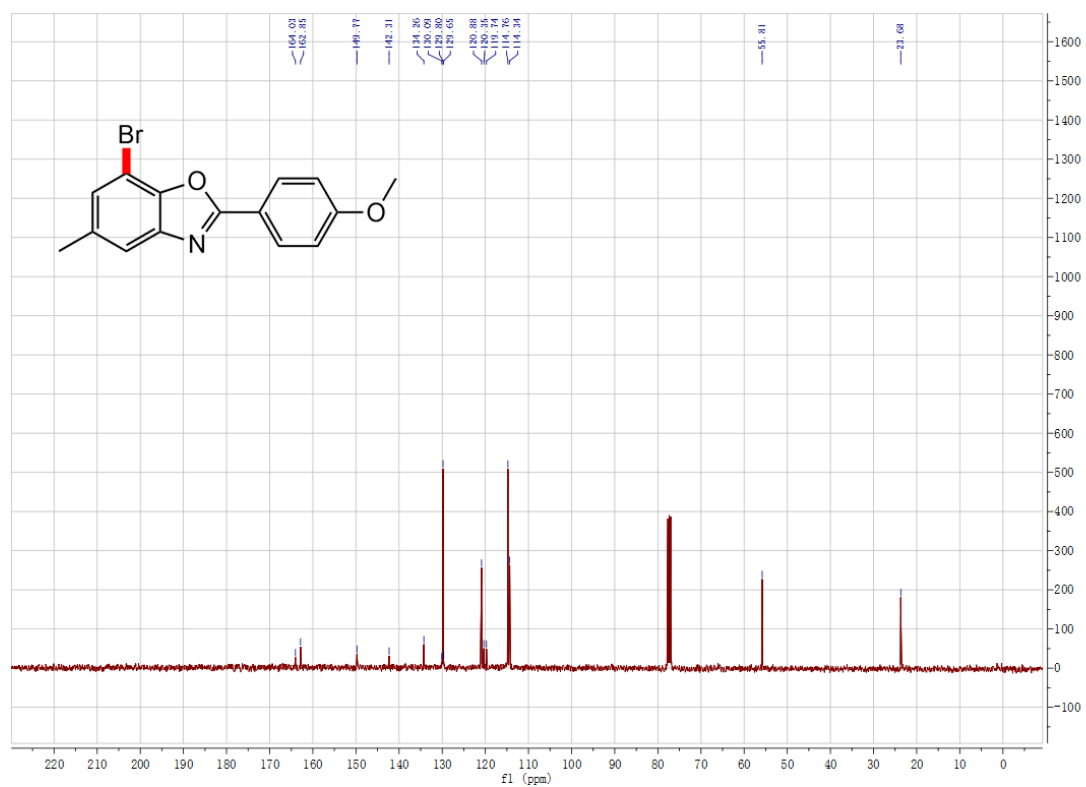

# 7-bromo-2-(4-fluorophenyl)-5-methylbenzo[d]oxazole (5k)

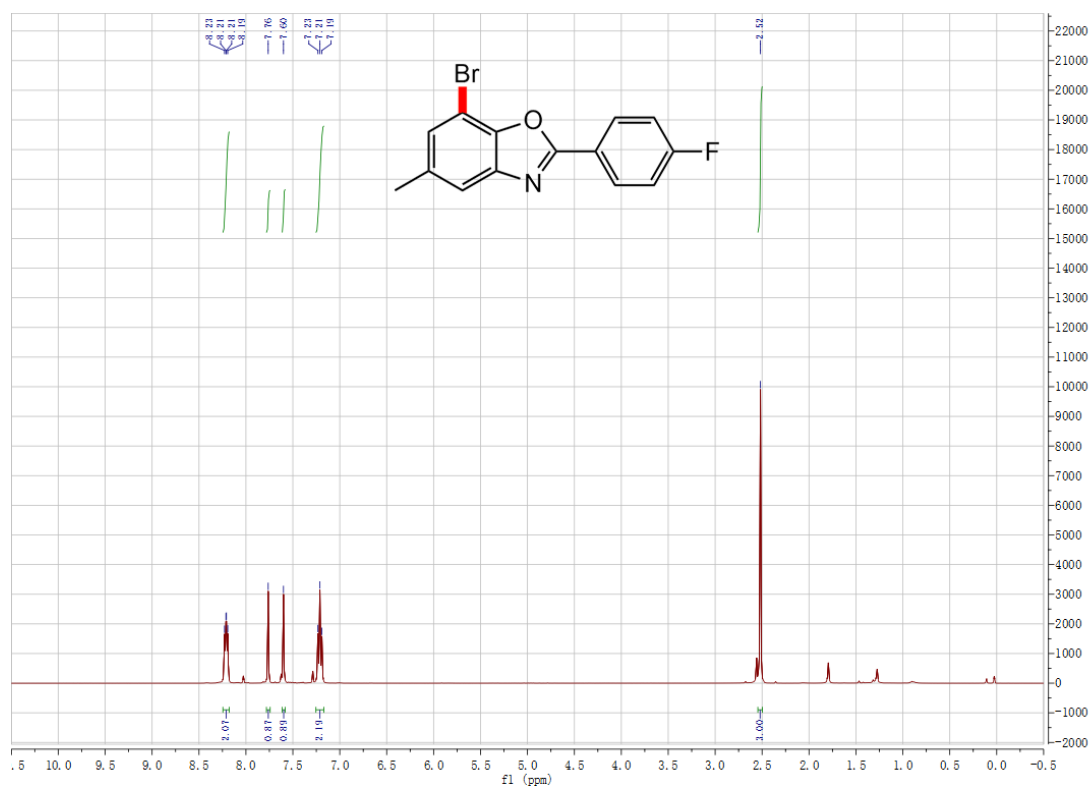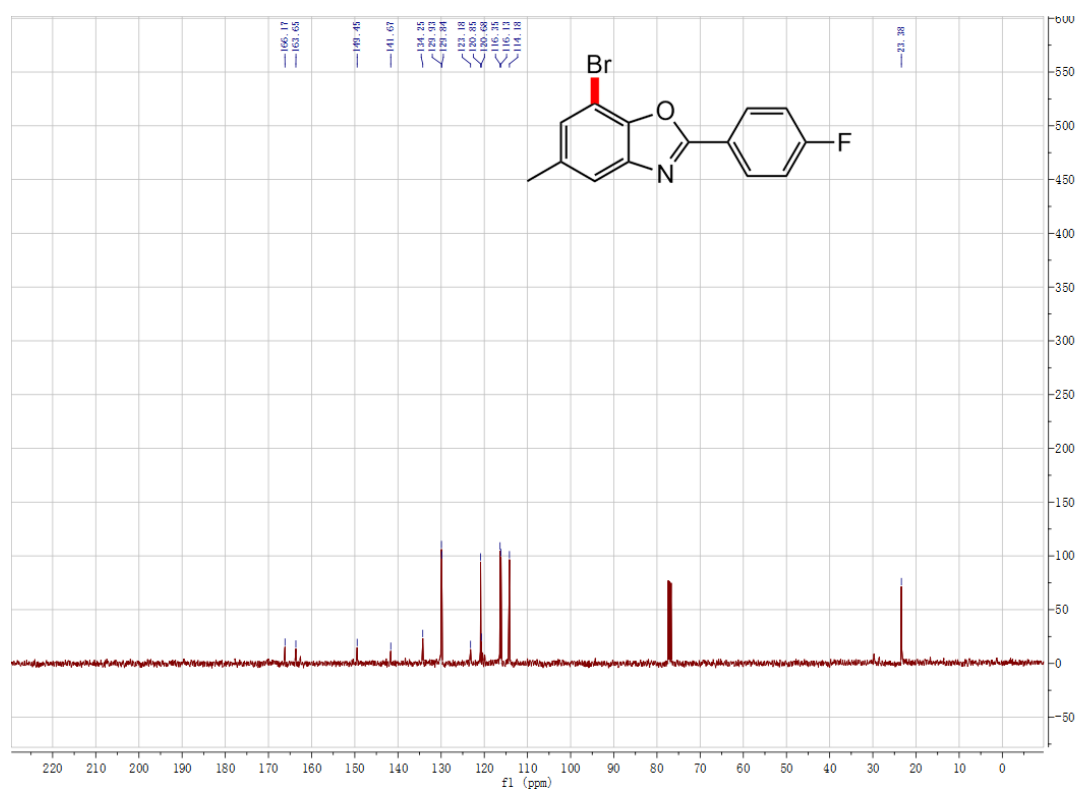

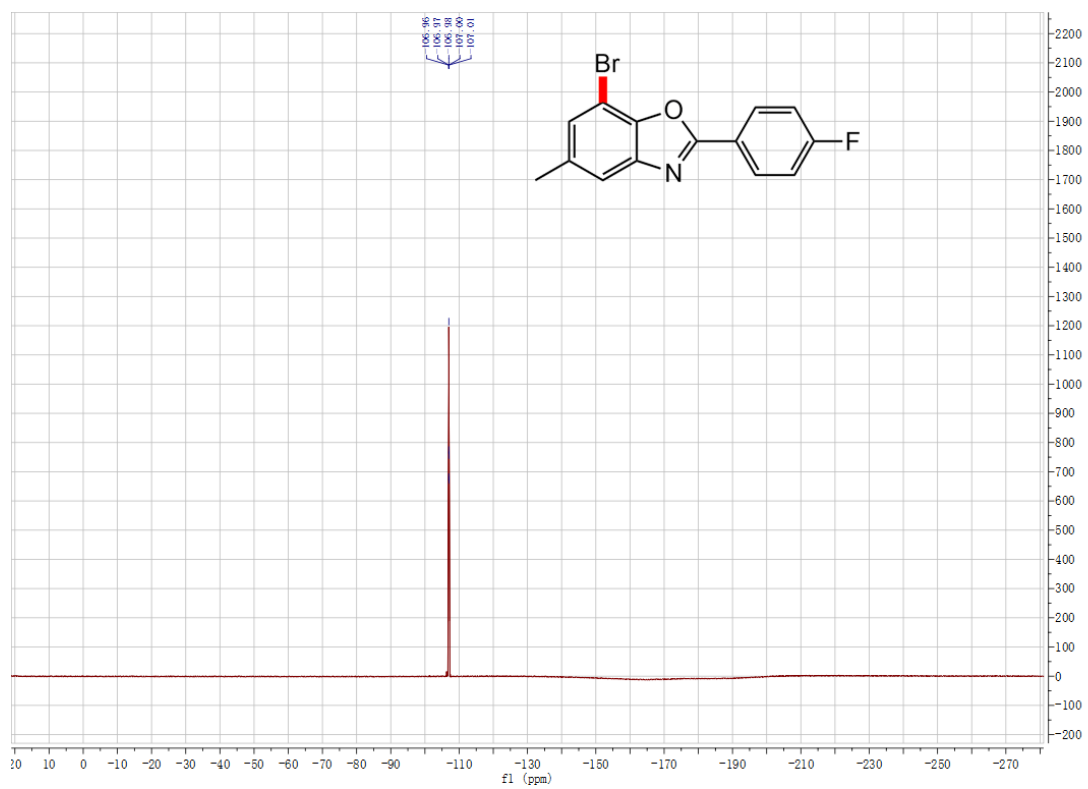

7-bromo-2-(4-(tert-butyl)phenyl)-5-methylbenzo[d]oxazole (5y)

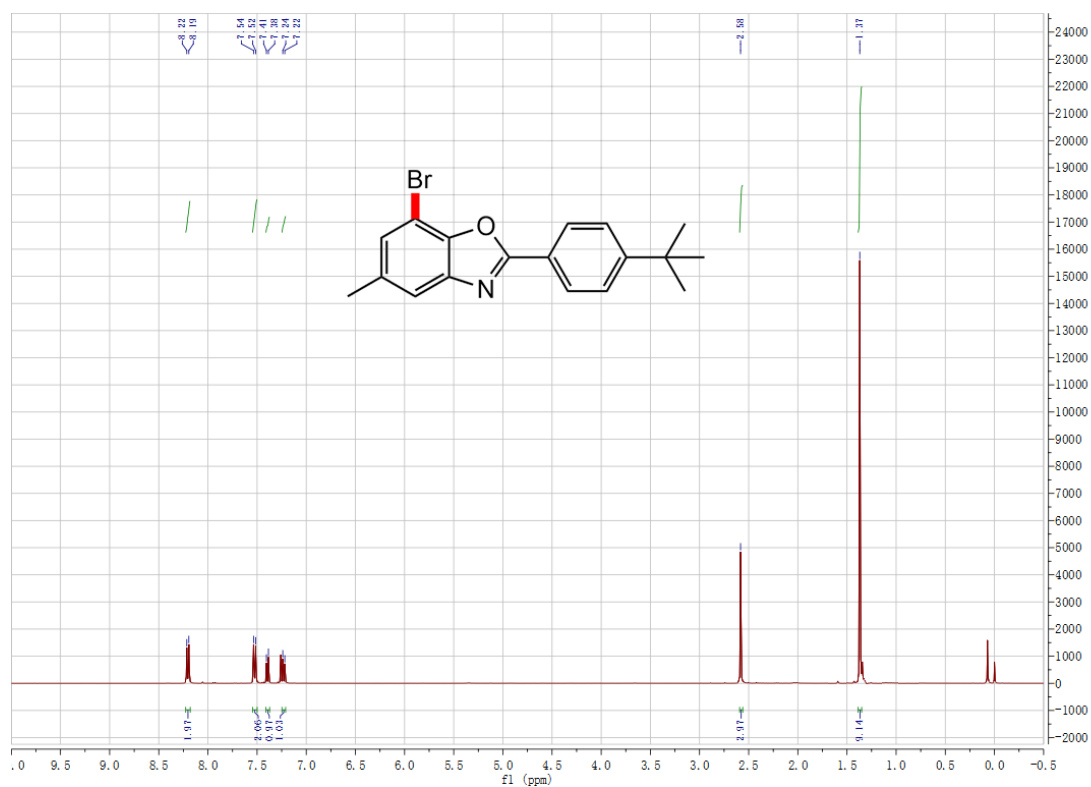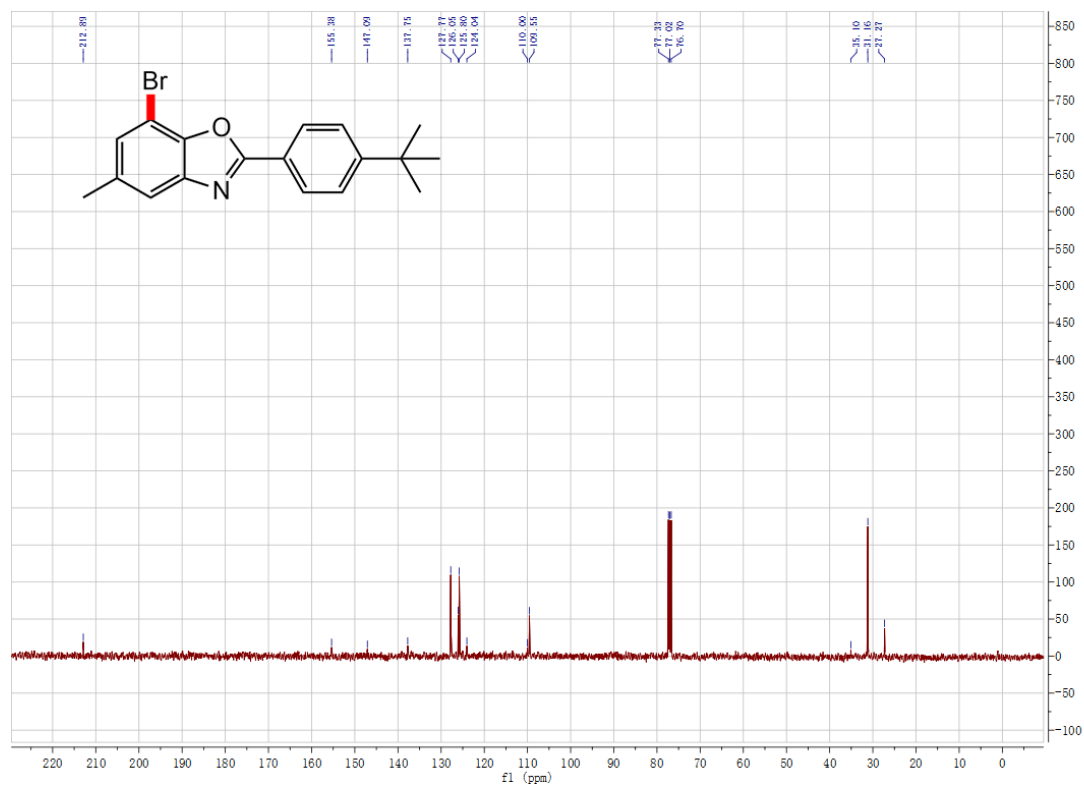

2-(4-chlorophenyl)-7-bromo-5-methylbenzo[d]oxazole (5z)

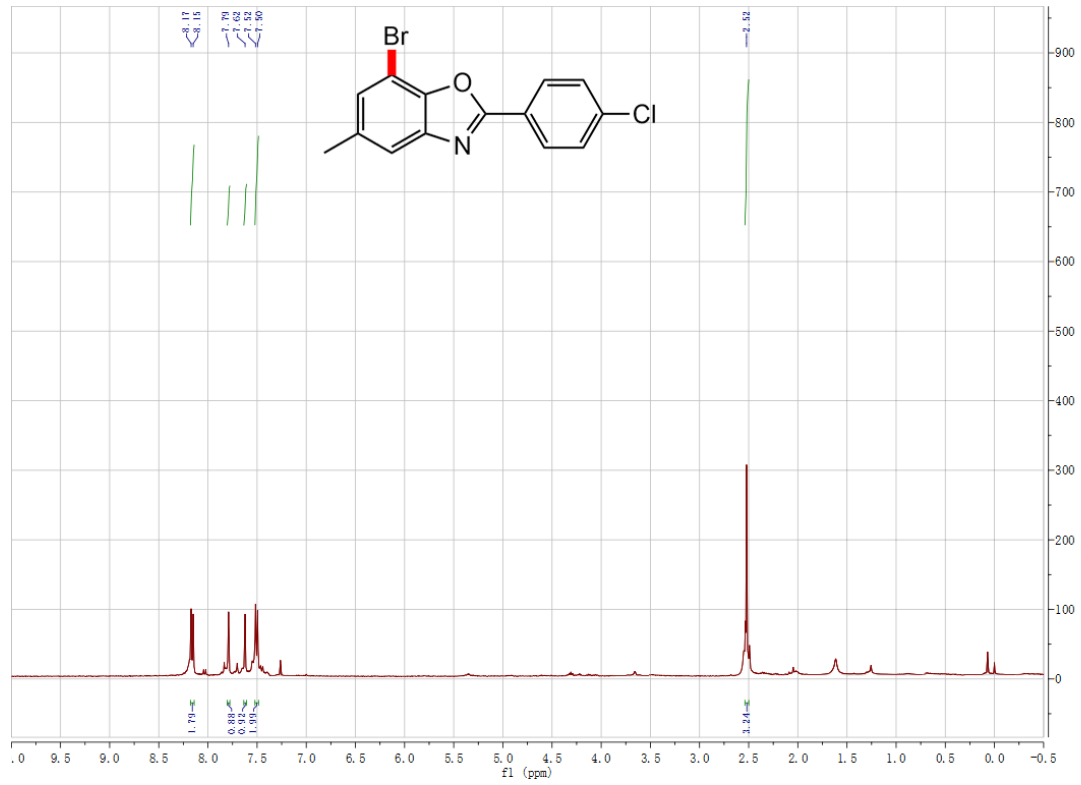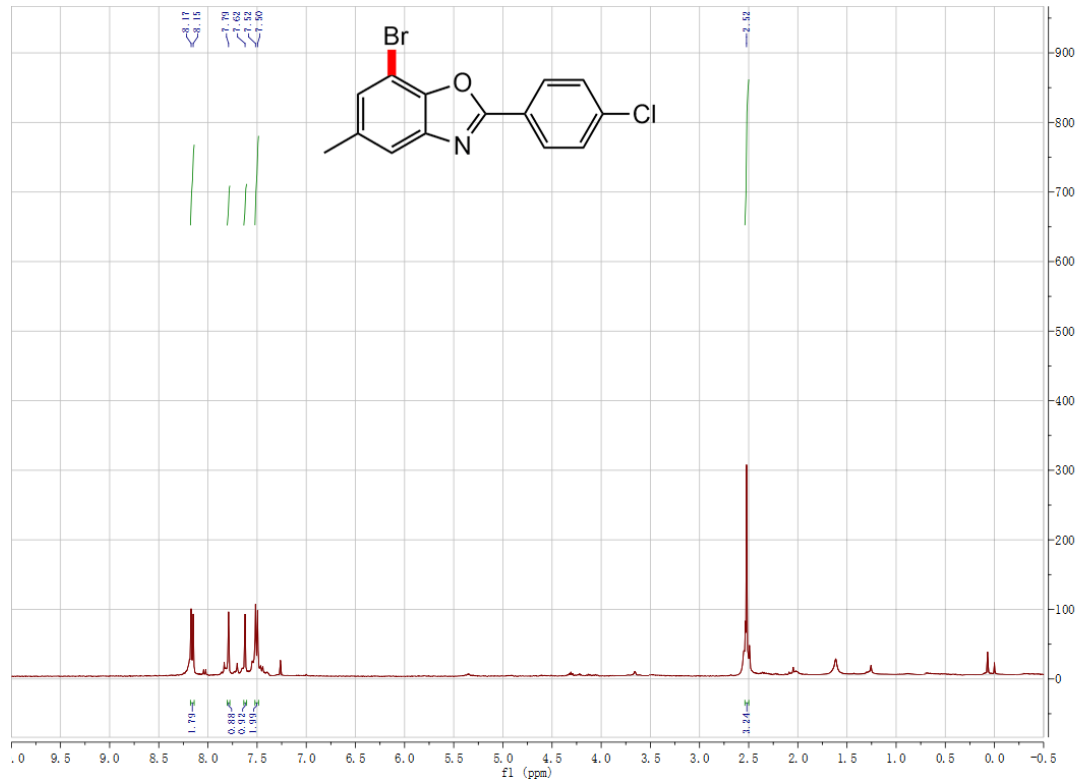

### 7-Iodo-5-methyl-2-(*o*-tolyl)benzo[*d*]oxazole (6a)

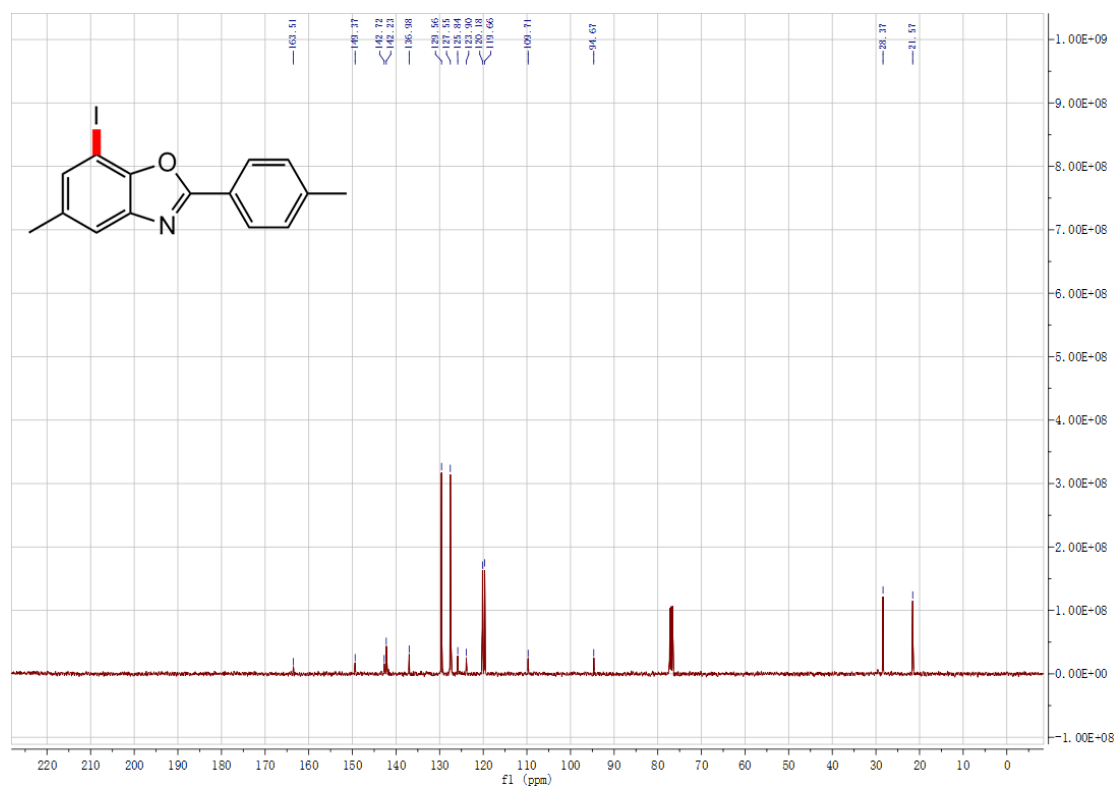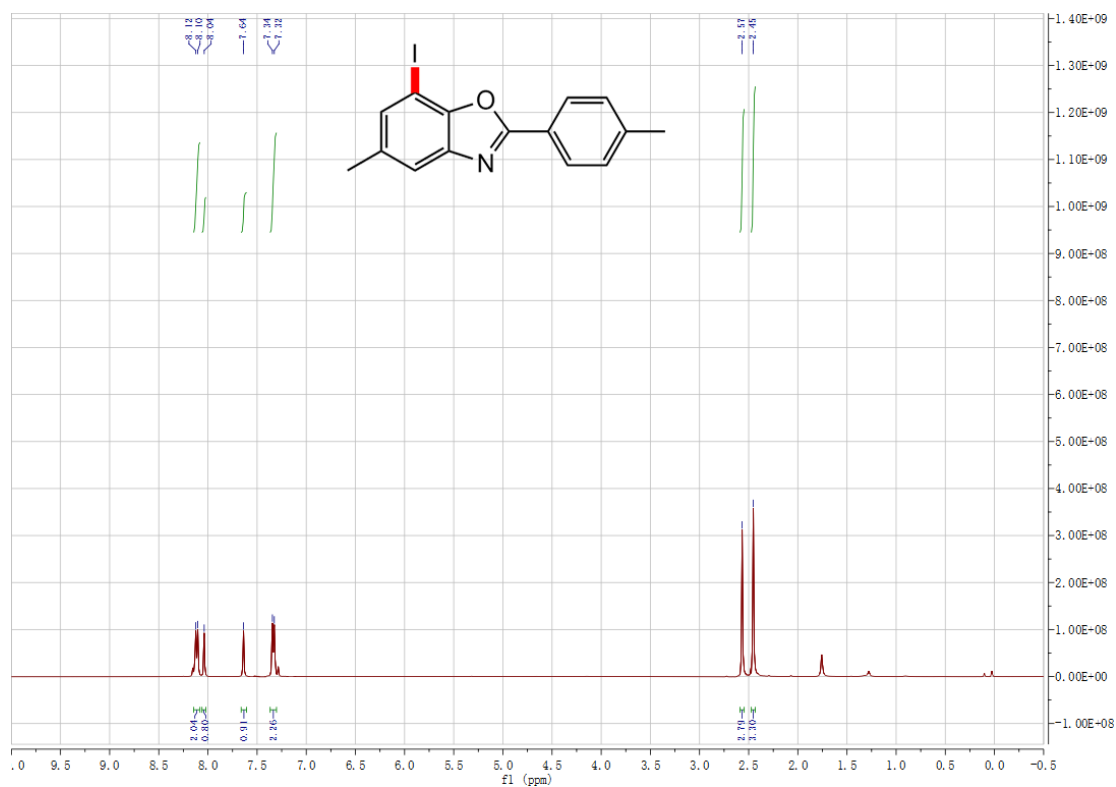

## 2-(2-chlorophenyl)-7-iodo-5-methylbenzo[d]oxazole (6c)

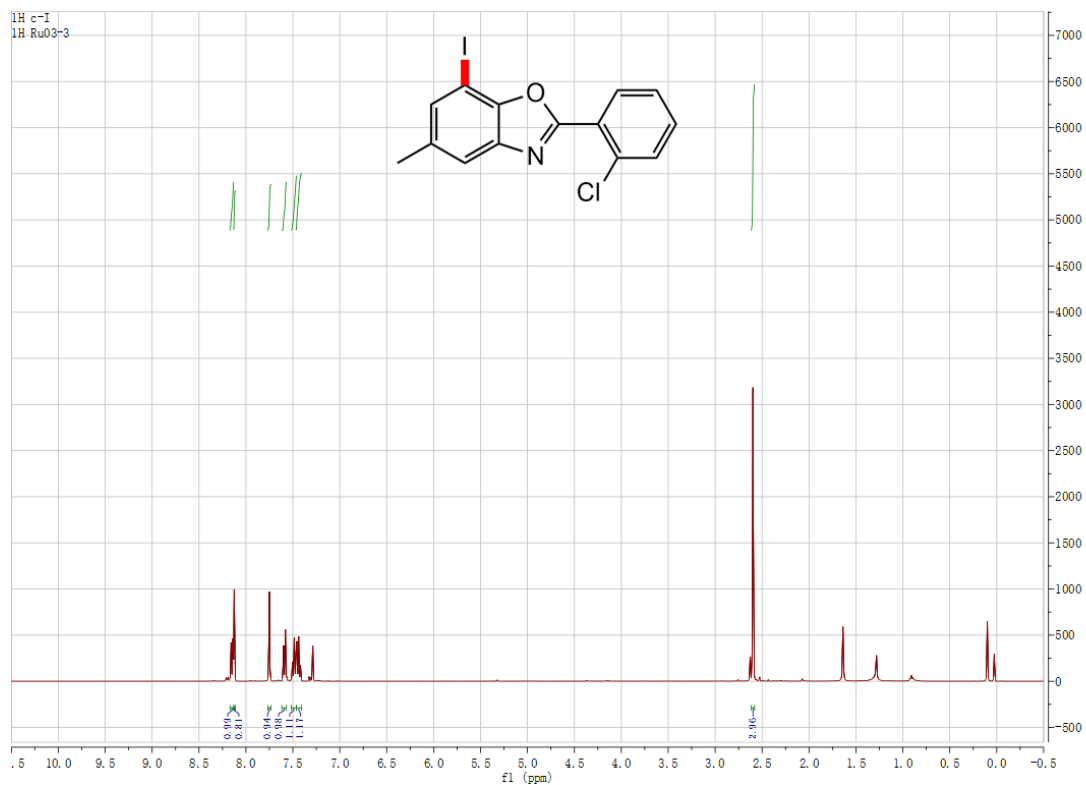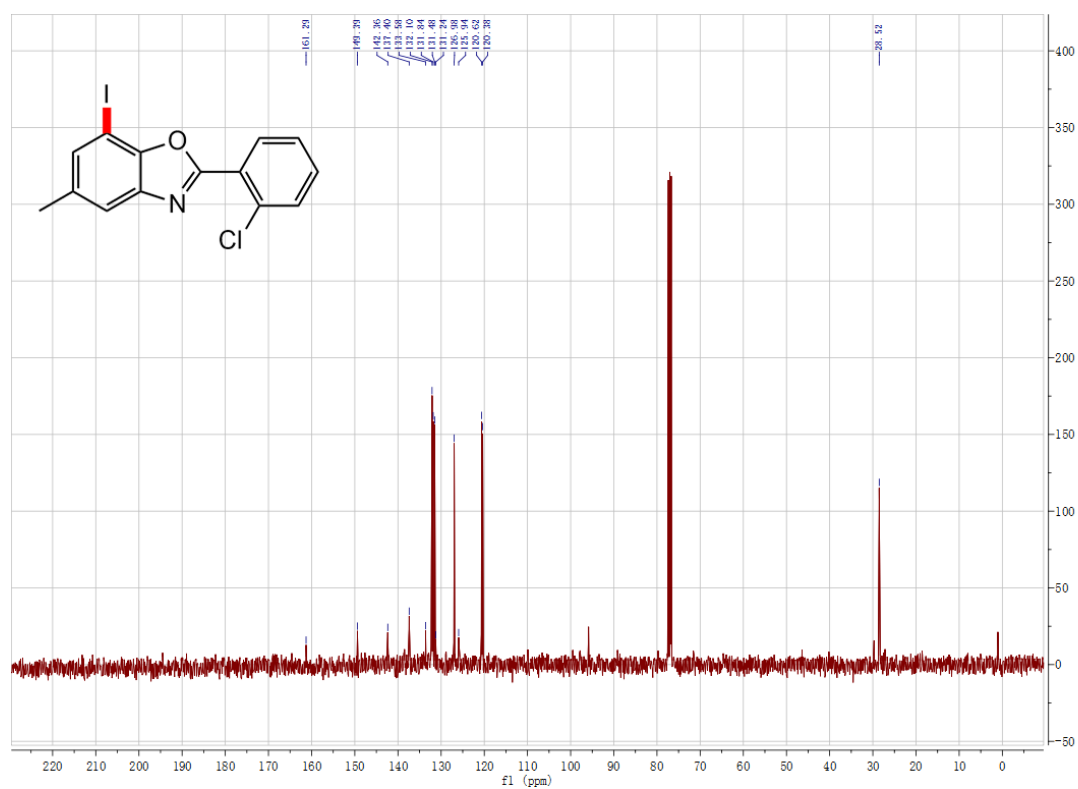

# 7-iodo-2-phenylbenzo[d]oxazole (6d)

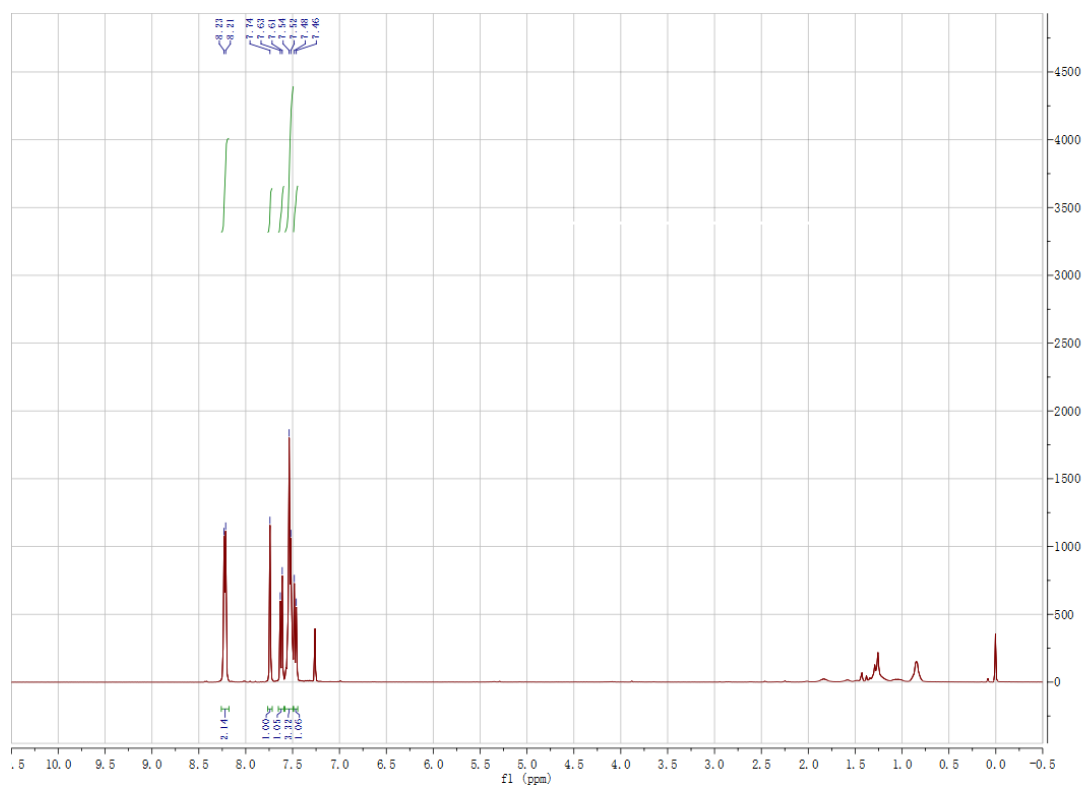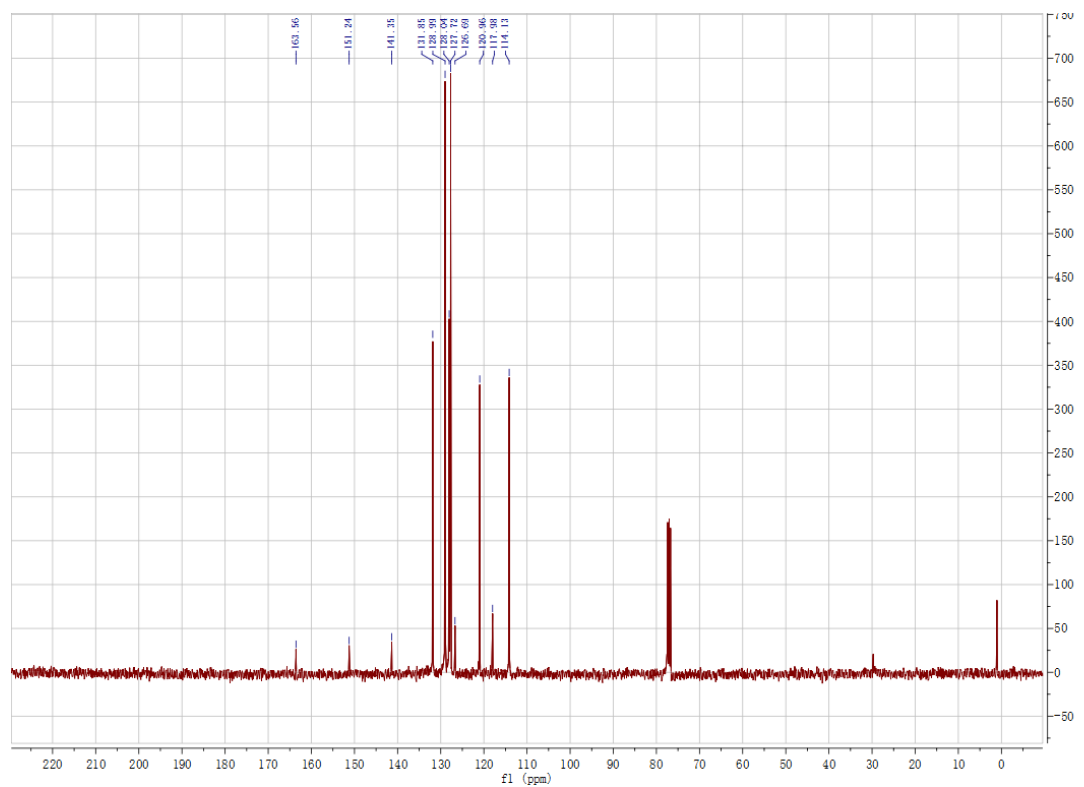



7-iodo-5-methyl-2-phenylbenzo[d]oxazole (6e)

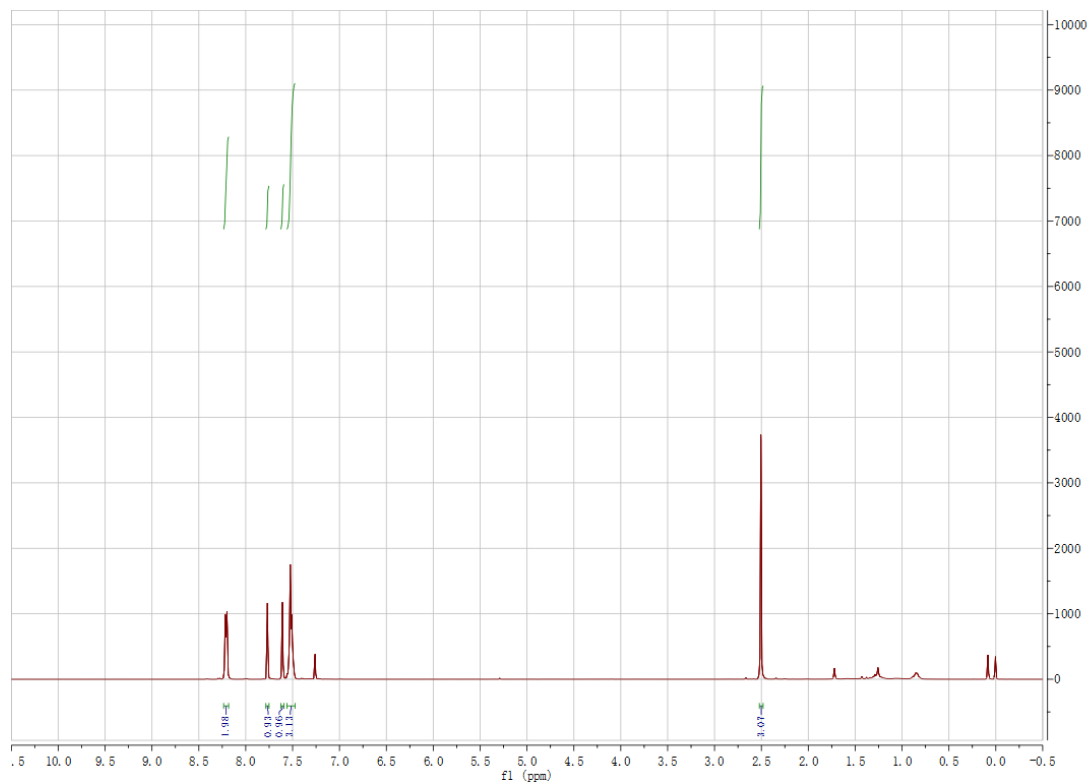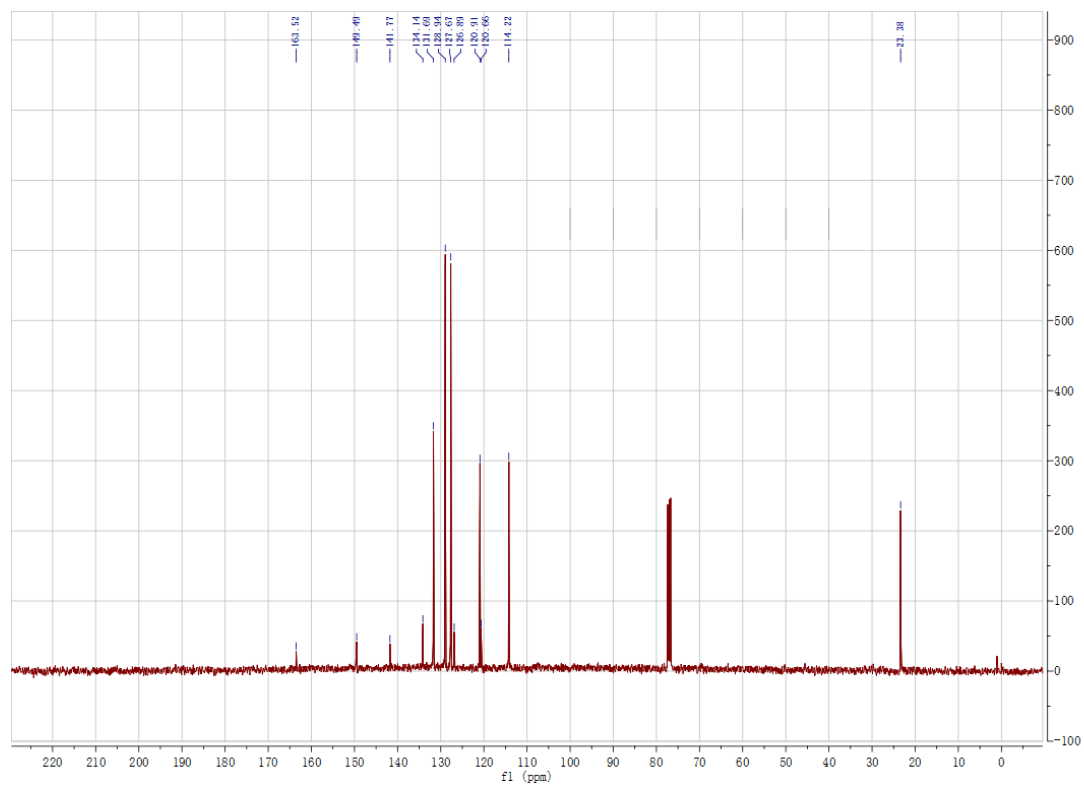

# 5-chloro-7-iodo-2-phenylbenzo[d]oxazole (6f)

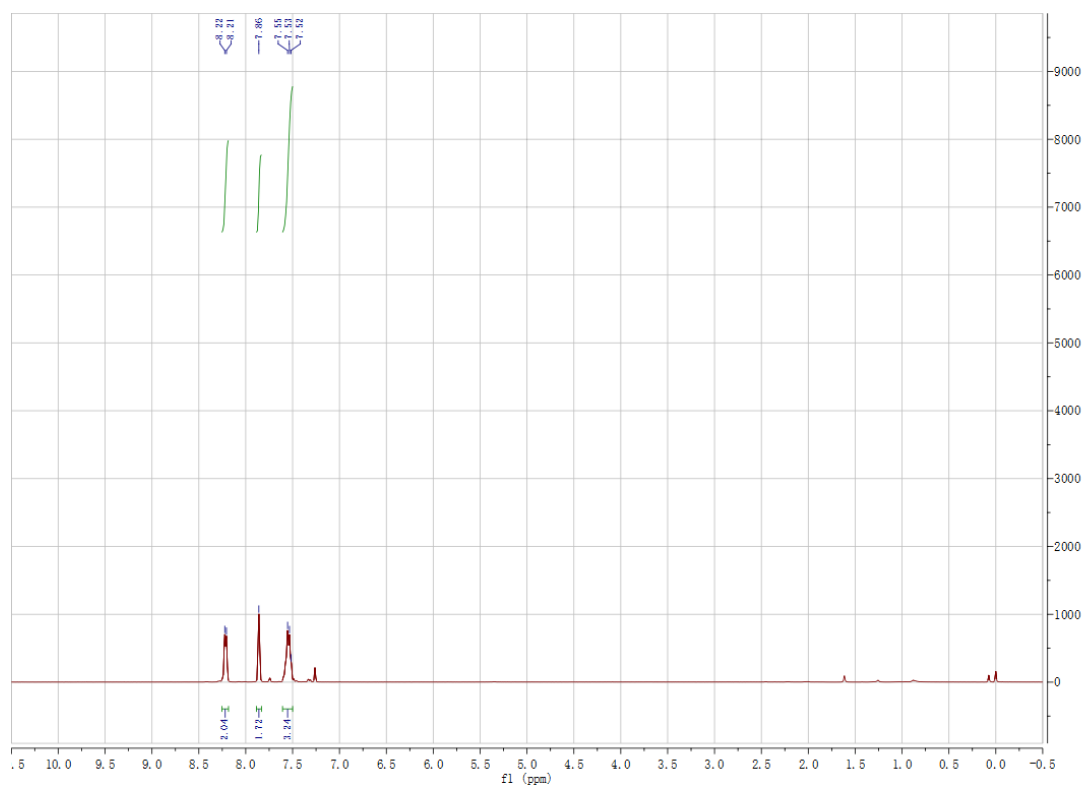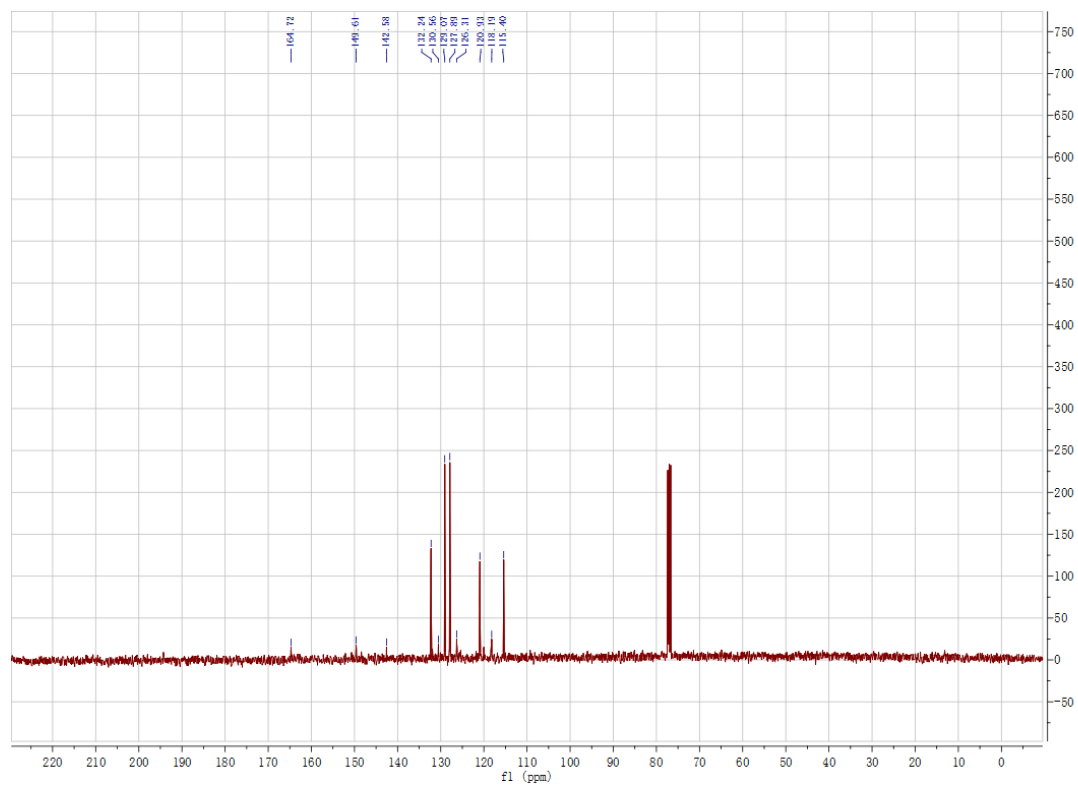

7-iodo-5-methyl-2-(m-tolyl)benzo[d]oxazole (6h)

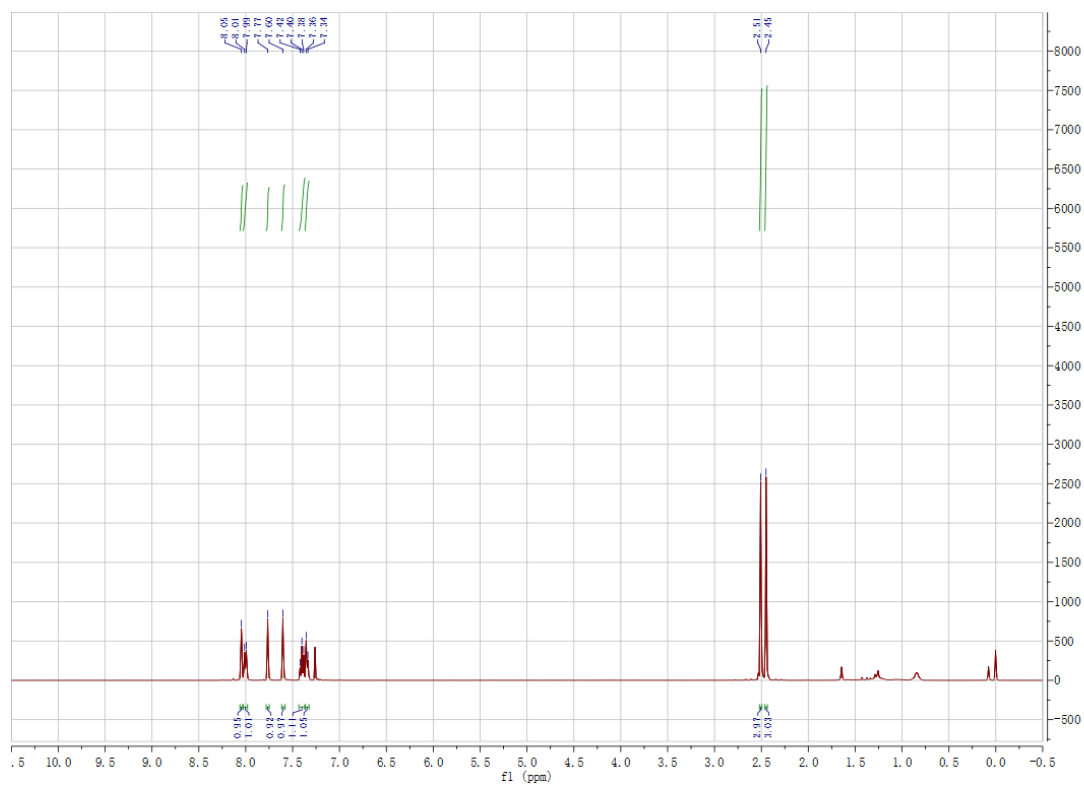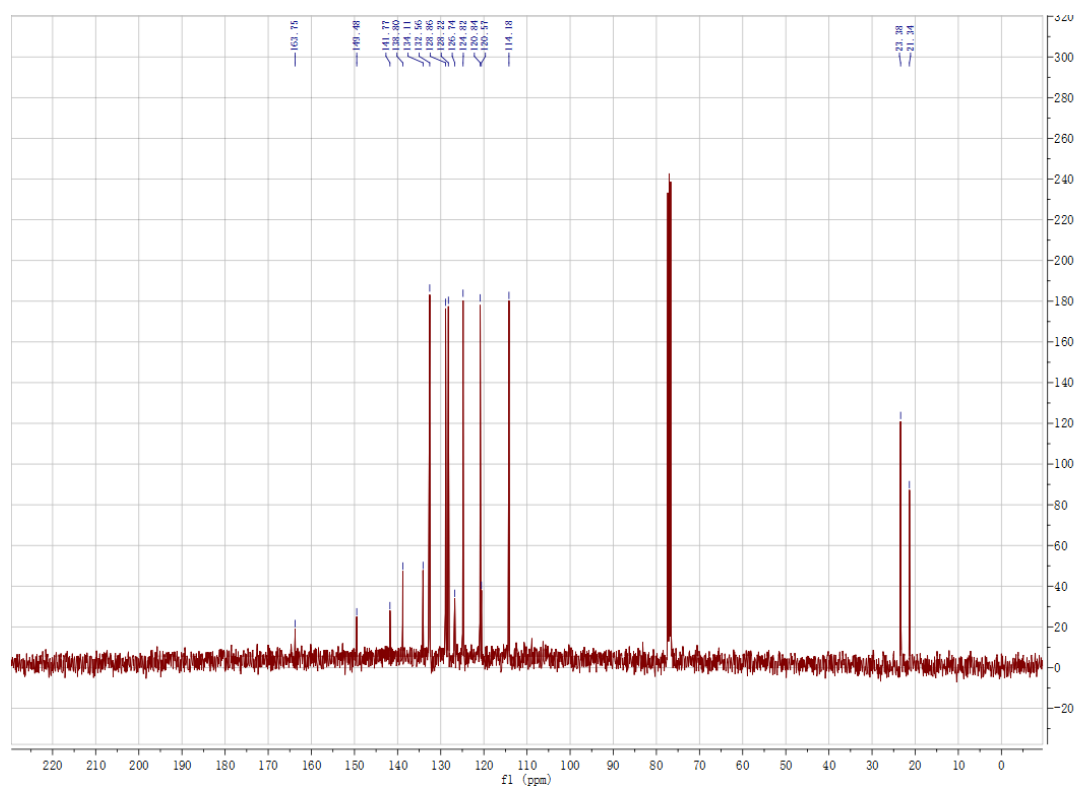

7-iodo-5-methyl-2-(p-tolyl)benzo[d]oxazole (6i)

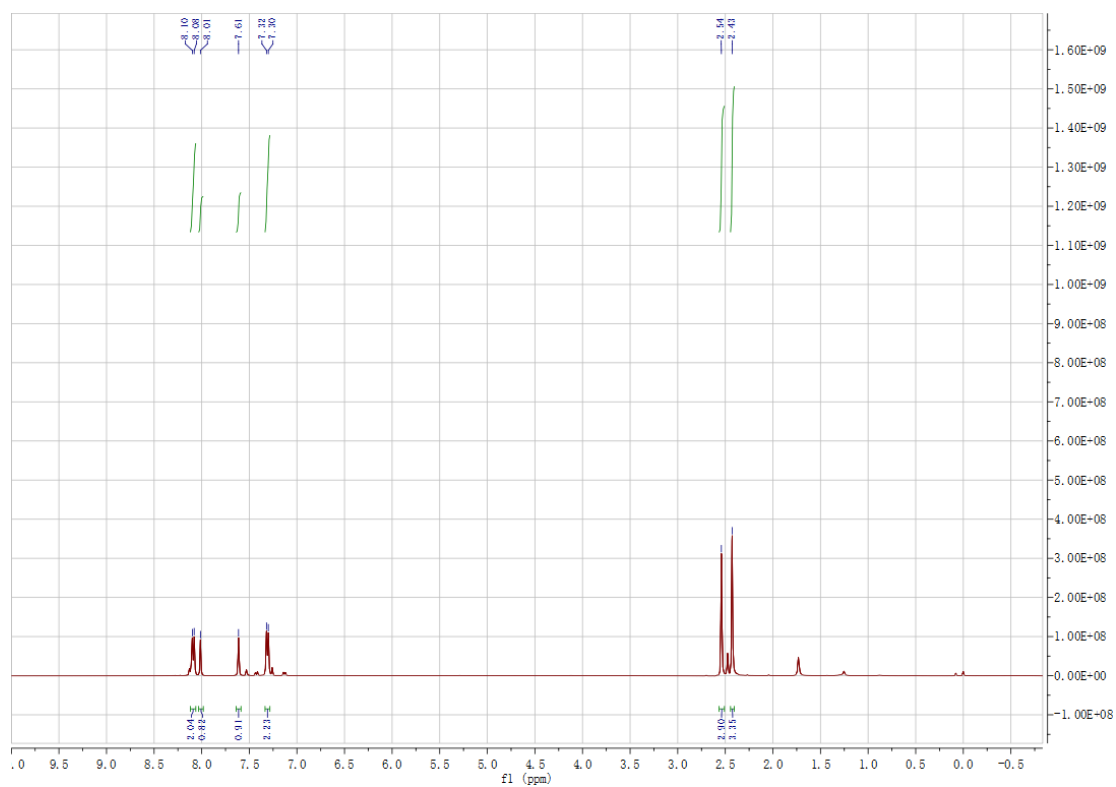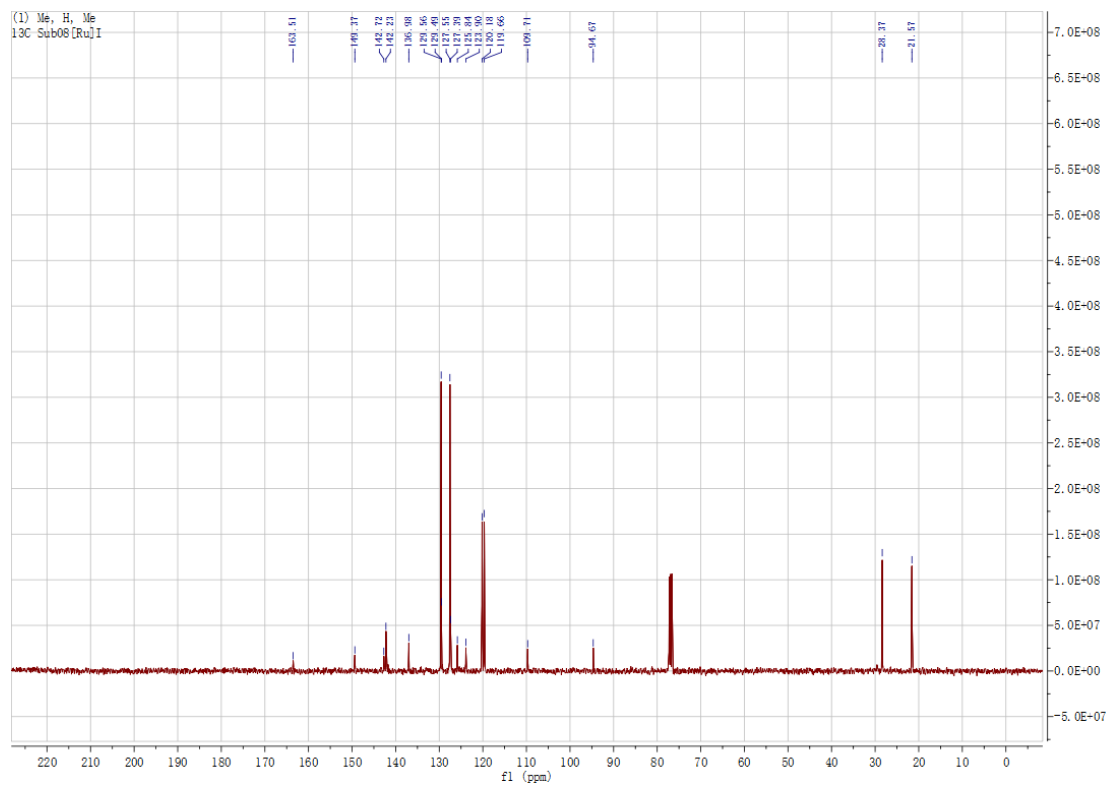

### 7-iodo-2-(4-methoxyphenyl)-5-methylbenzo[d]oxazole (6j)

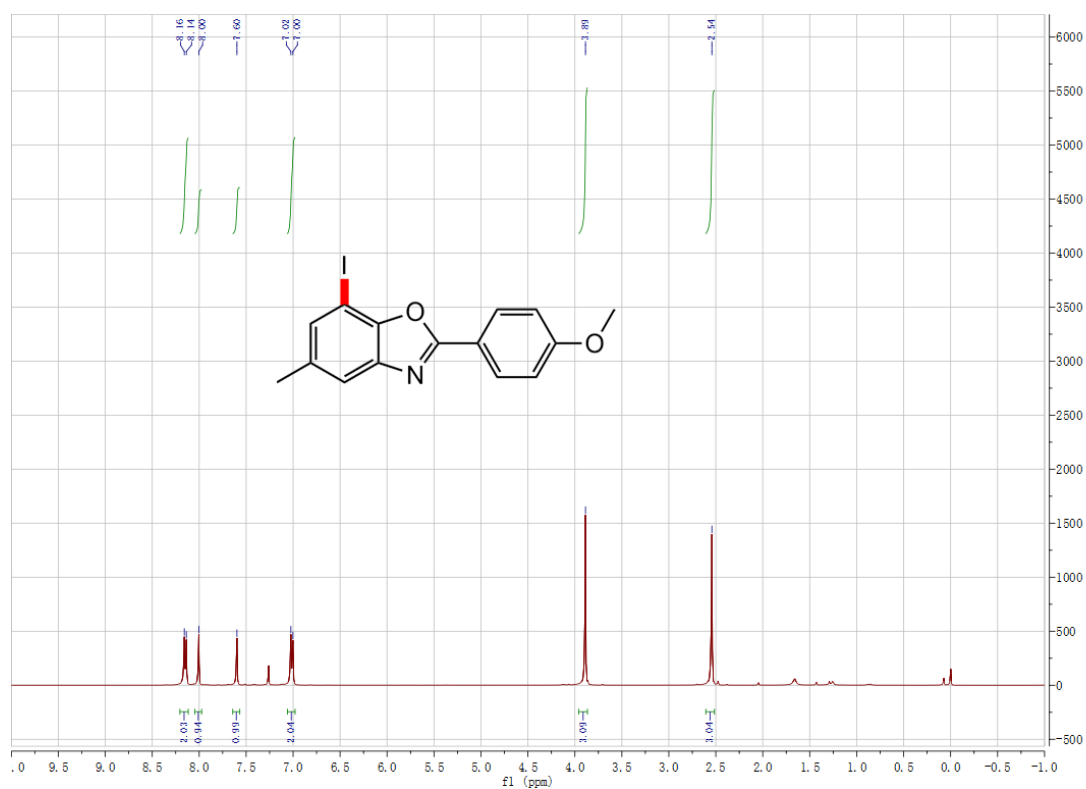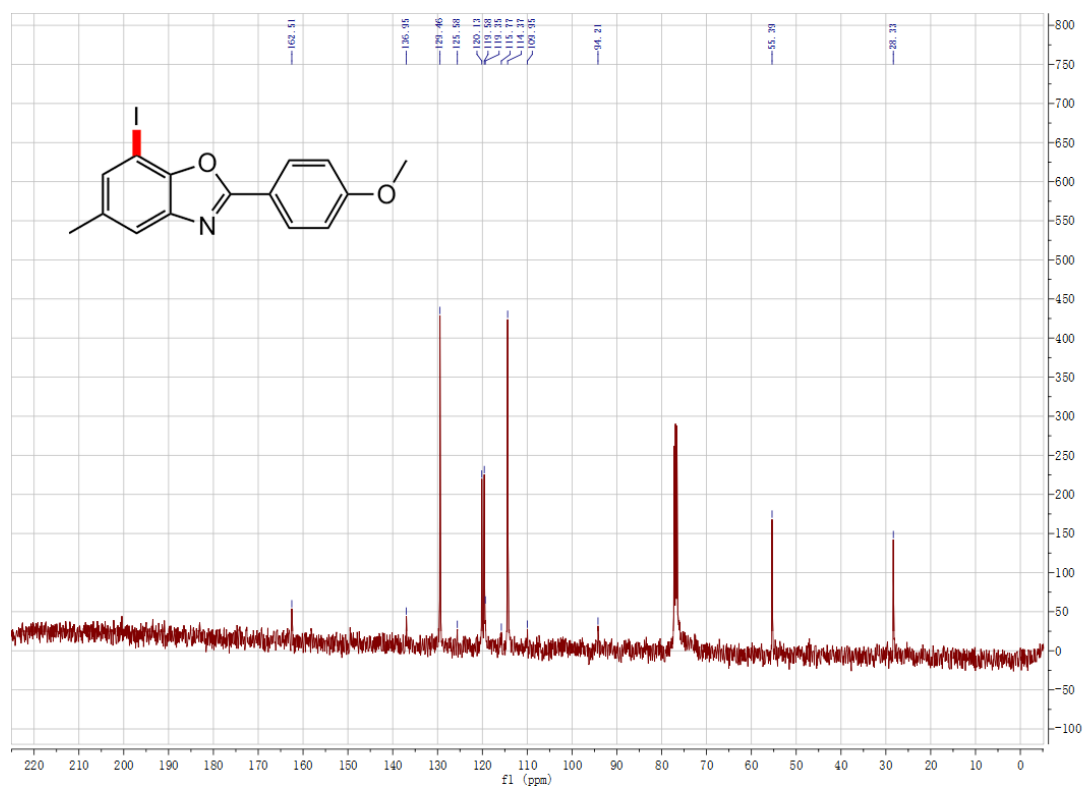

2-(4-fluorophenyl)-7-iodo-5-methylbenzo[d]oxazole (6k)

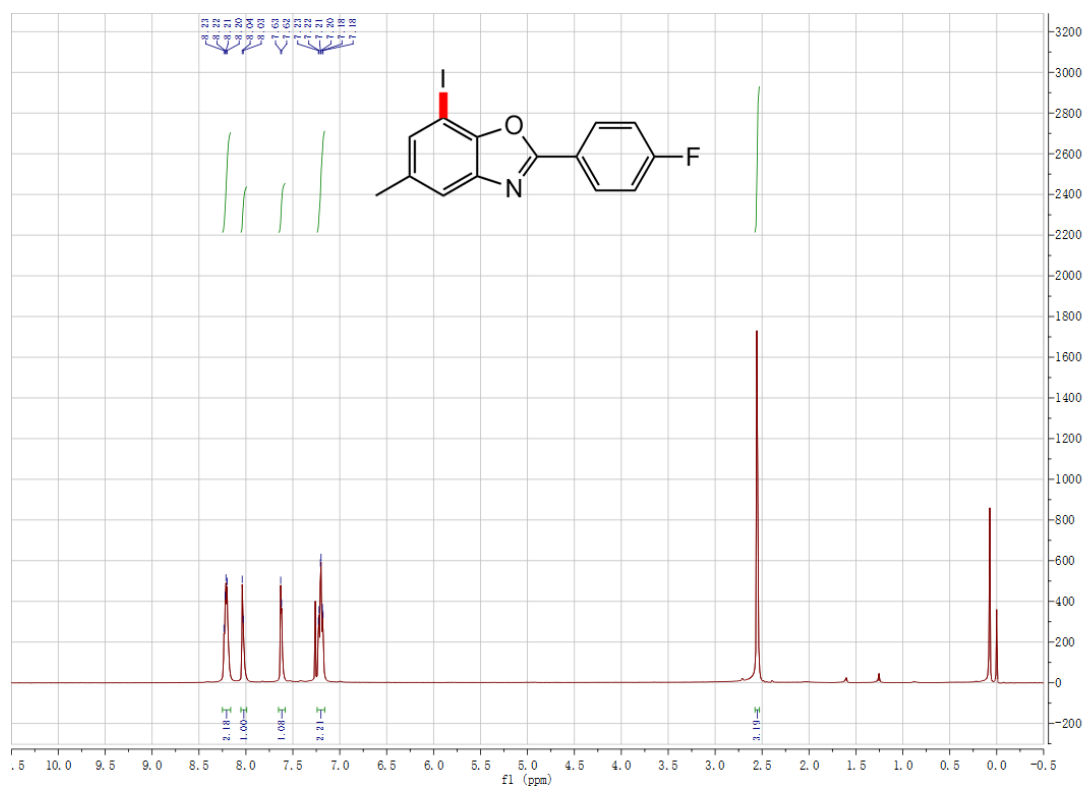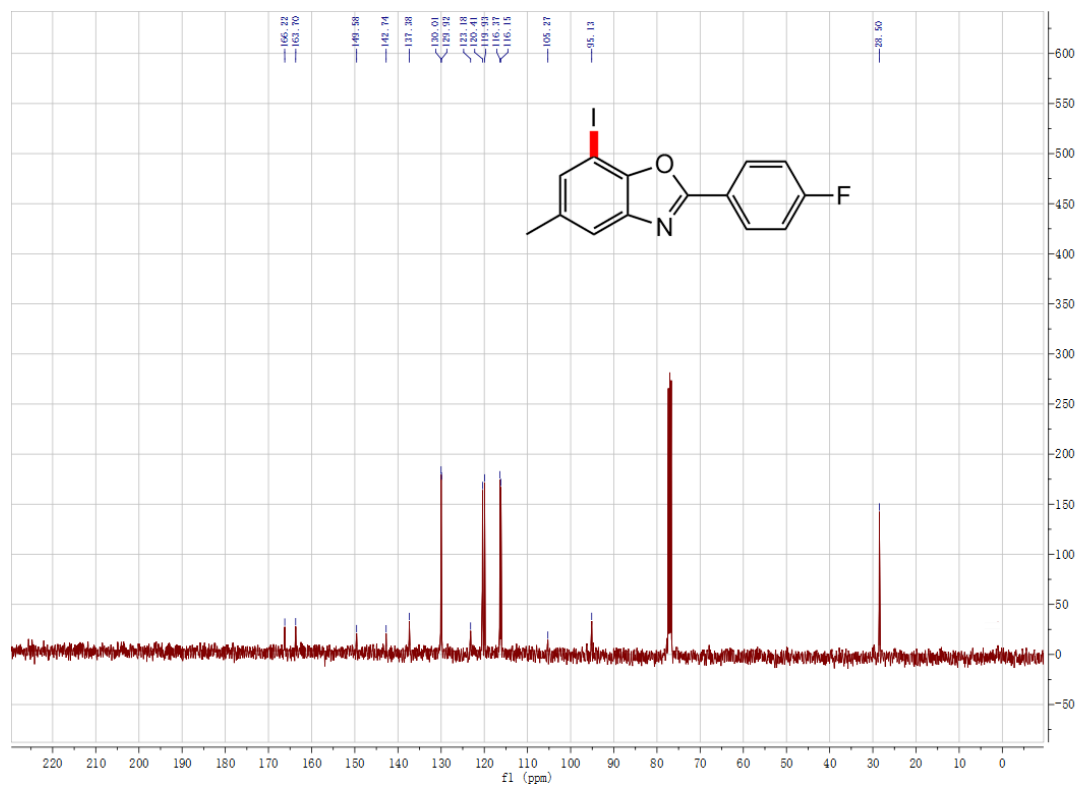

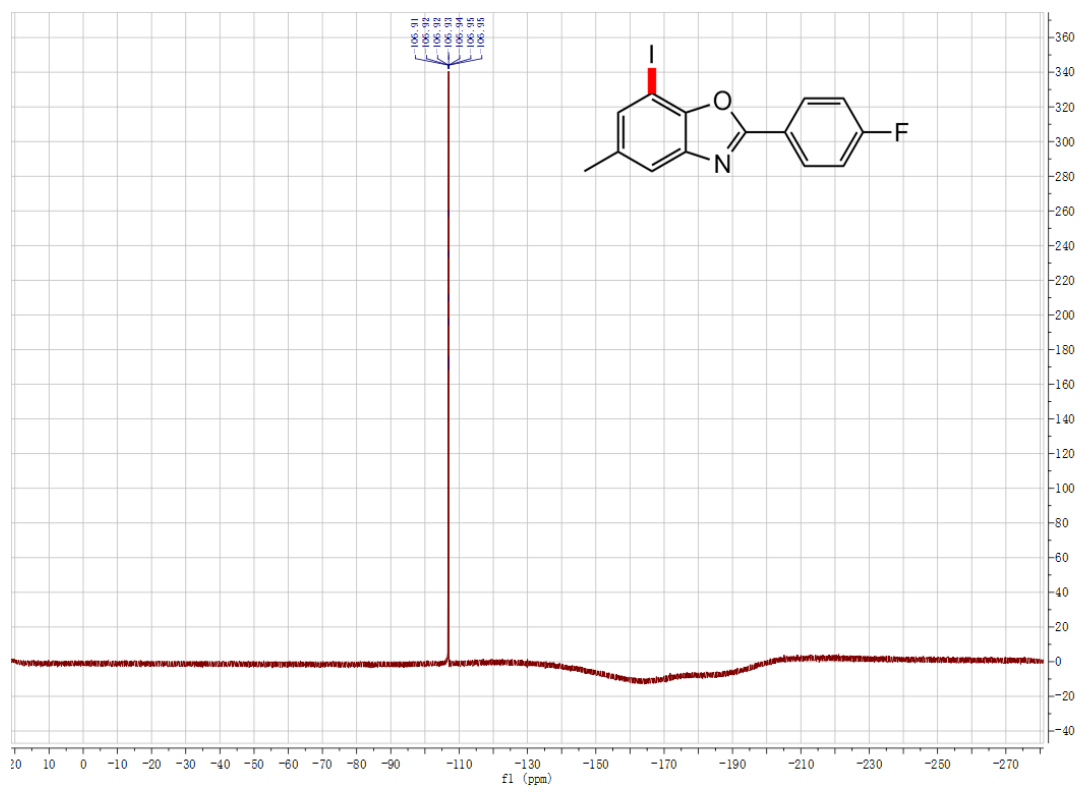

# 7-iodo-2-(4-(tert-butyl)phenyl)-5-methylbenzo[d]oxazole (6y)

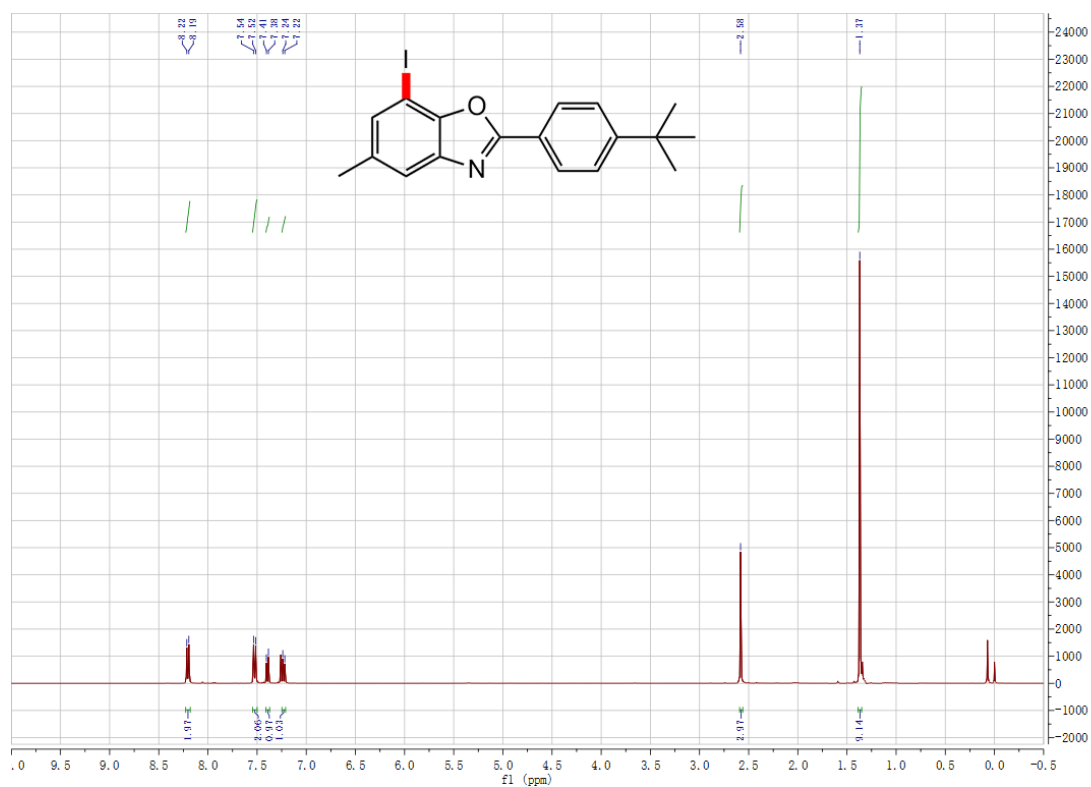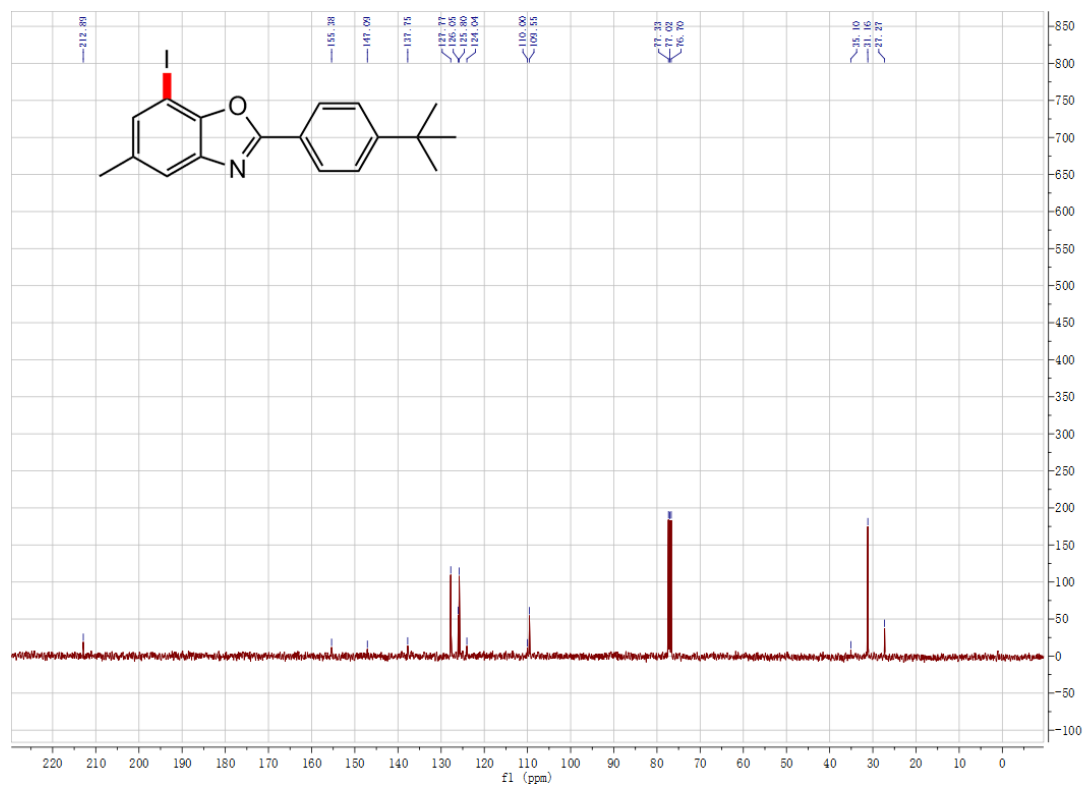



## 2-(4-chlorophenyl)-7-iodo-5-methylbenzo[d]oxazole (6z)

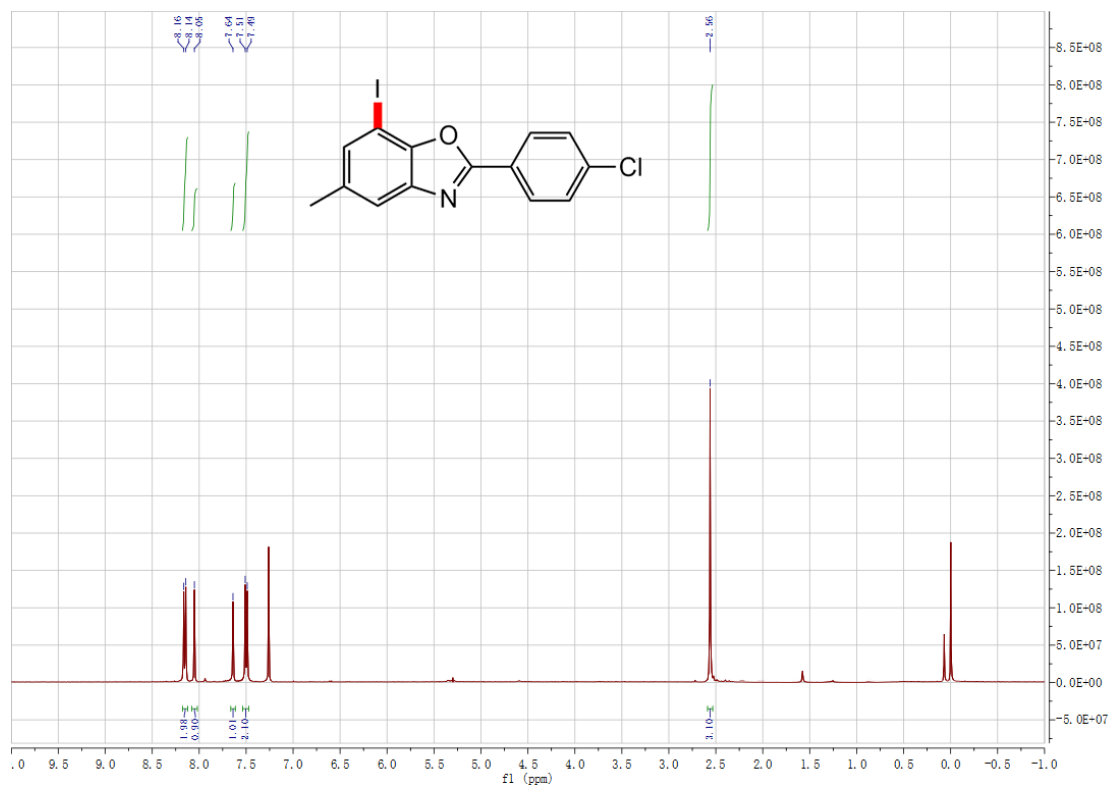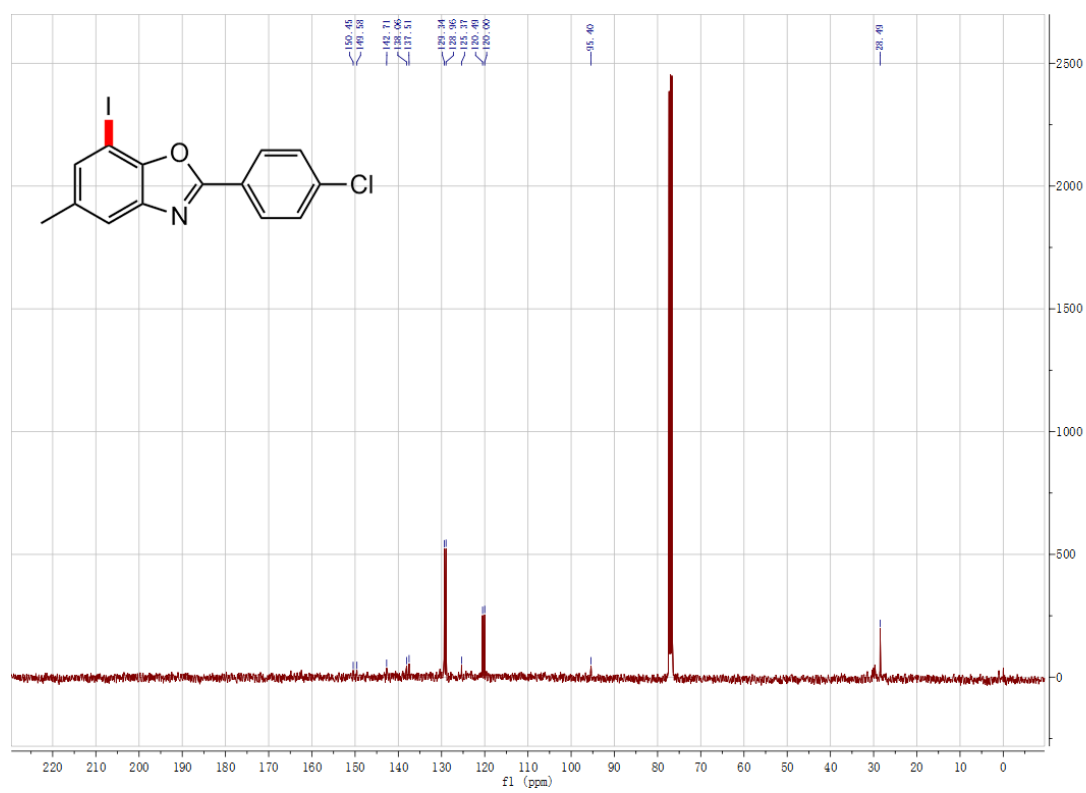

# 7-chloro-5-methyl-2-(o-tolyl)benzo[d]oxazole (7a)

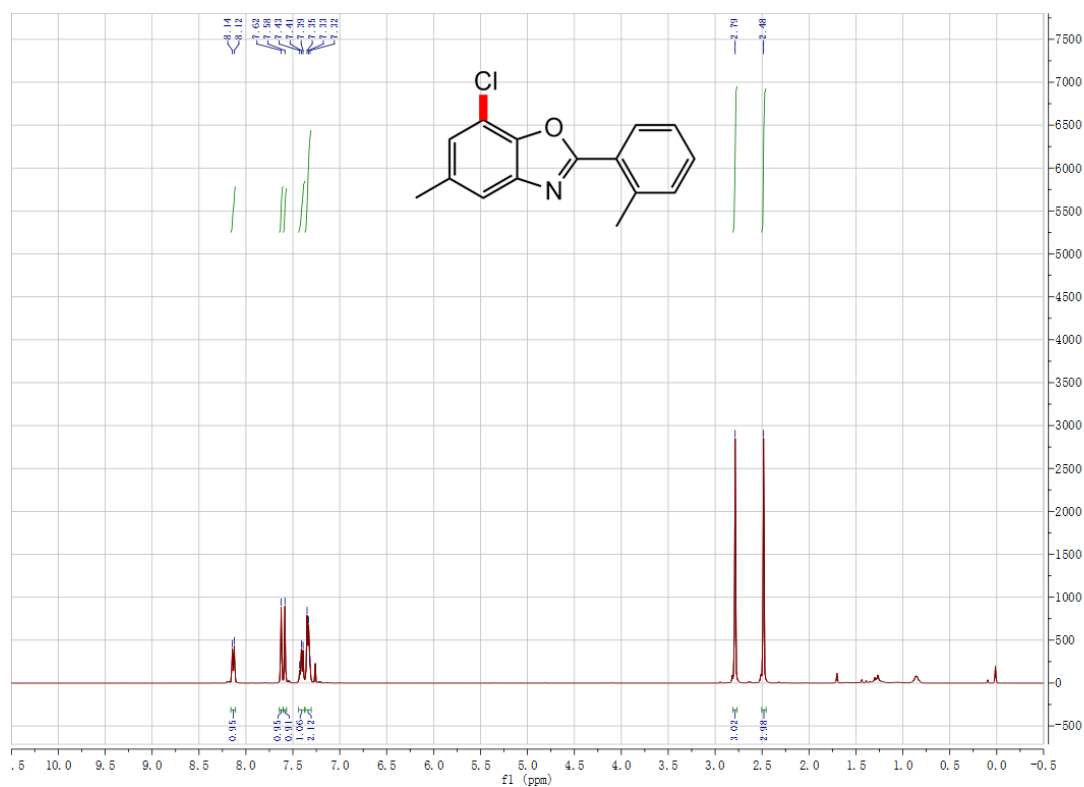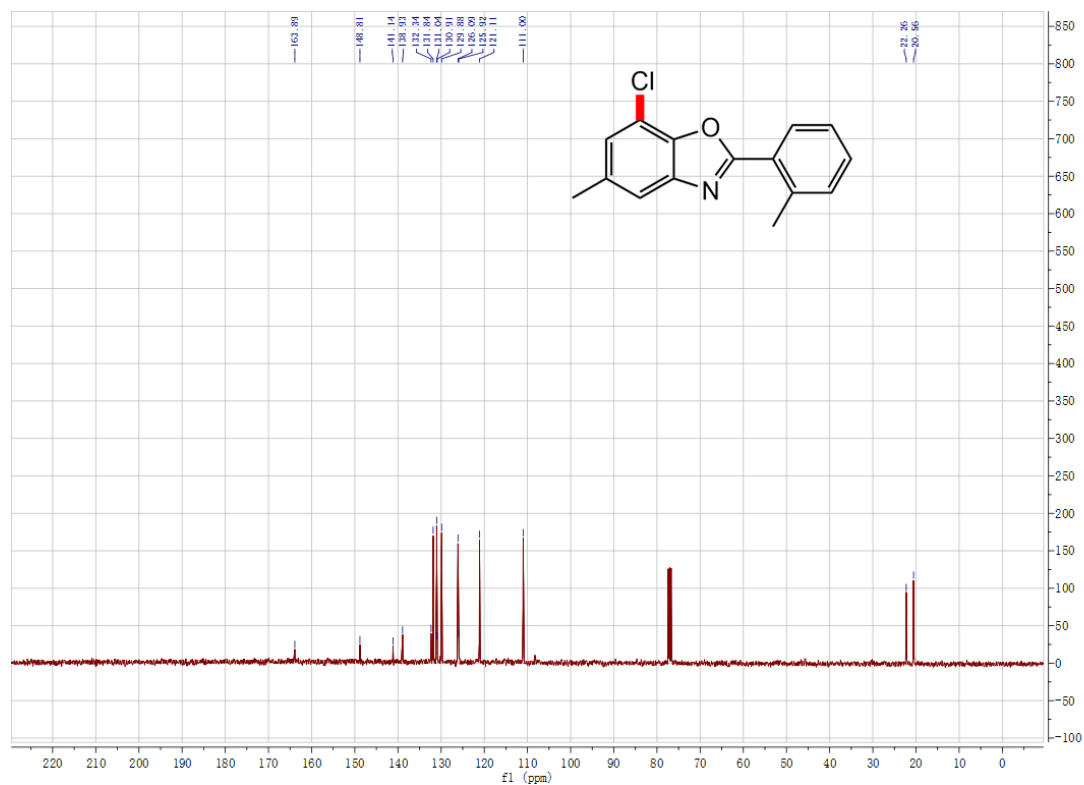

# 7-chloro-2-(2-chlorophenyl)-5-methylbenzo[d]oxazole (7c)

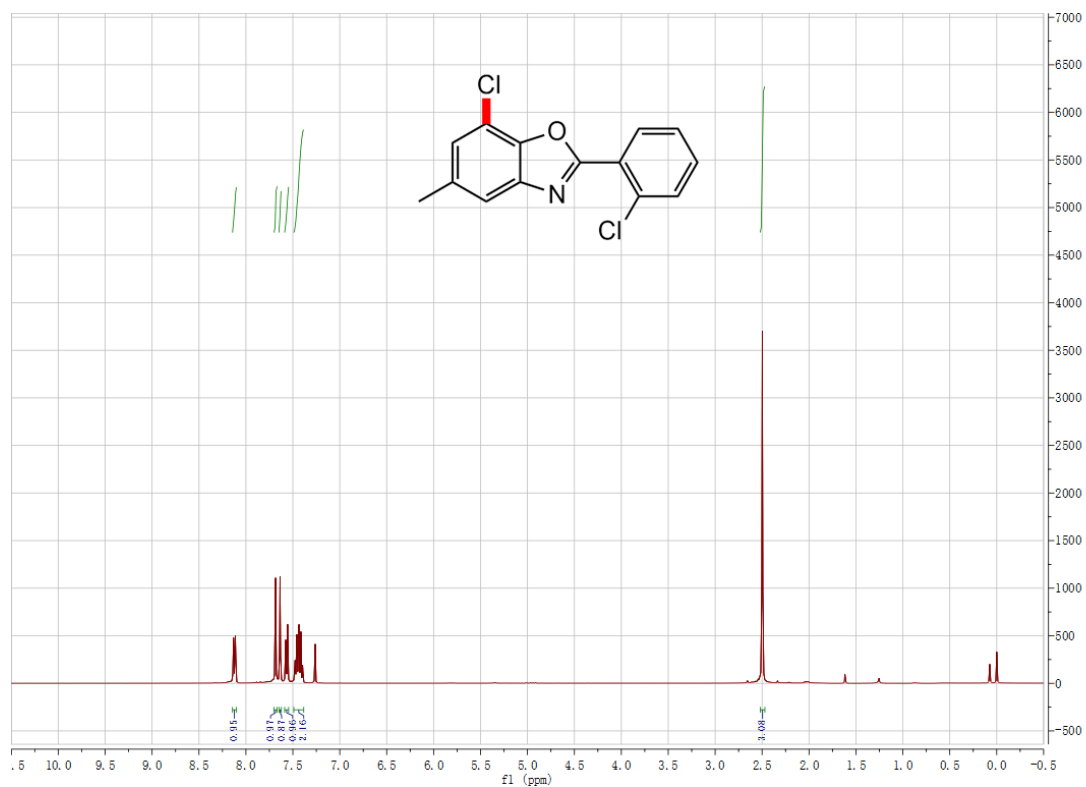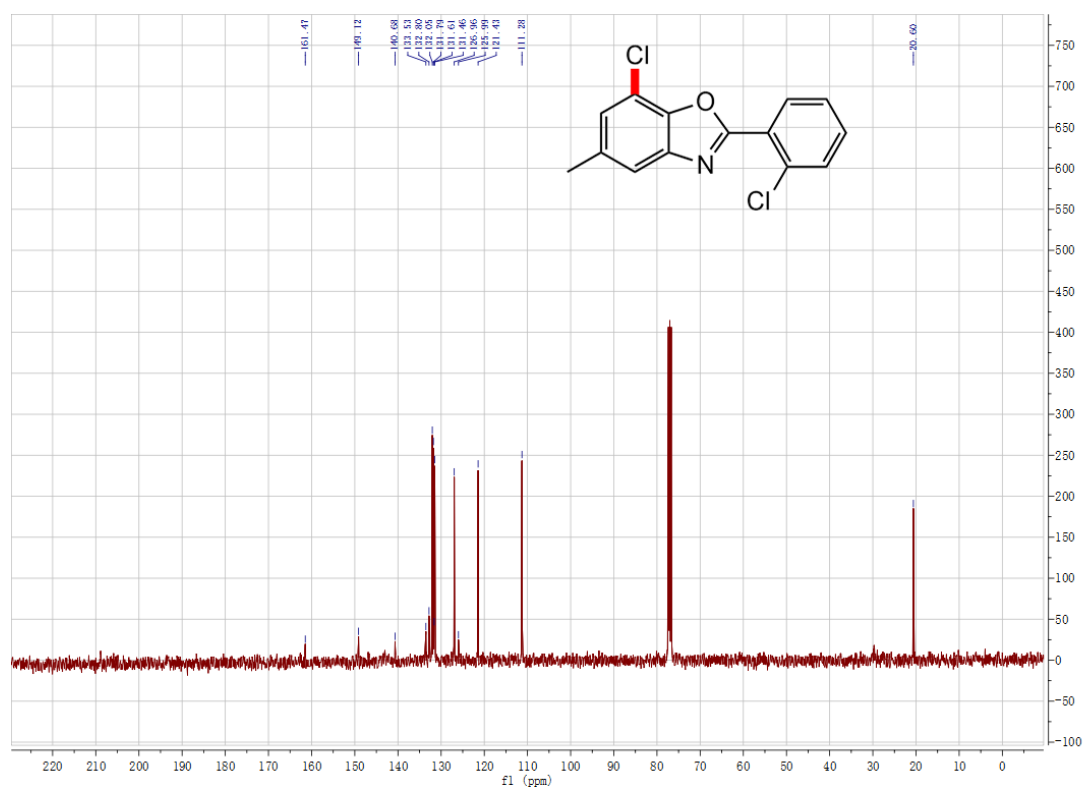

# 7-chloro-2-phenylbenzo[d]oxazole (7d)

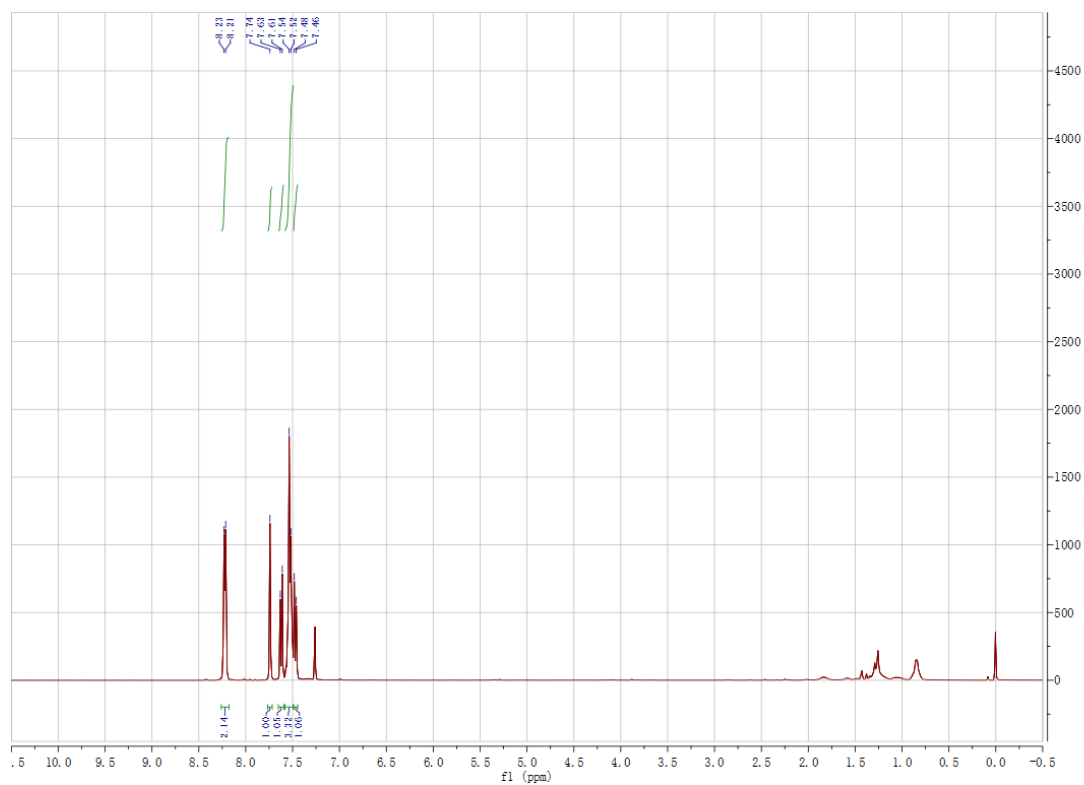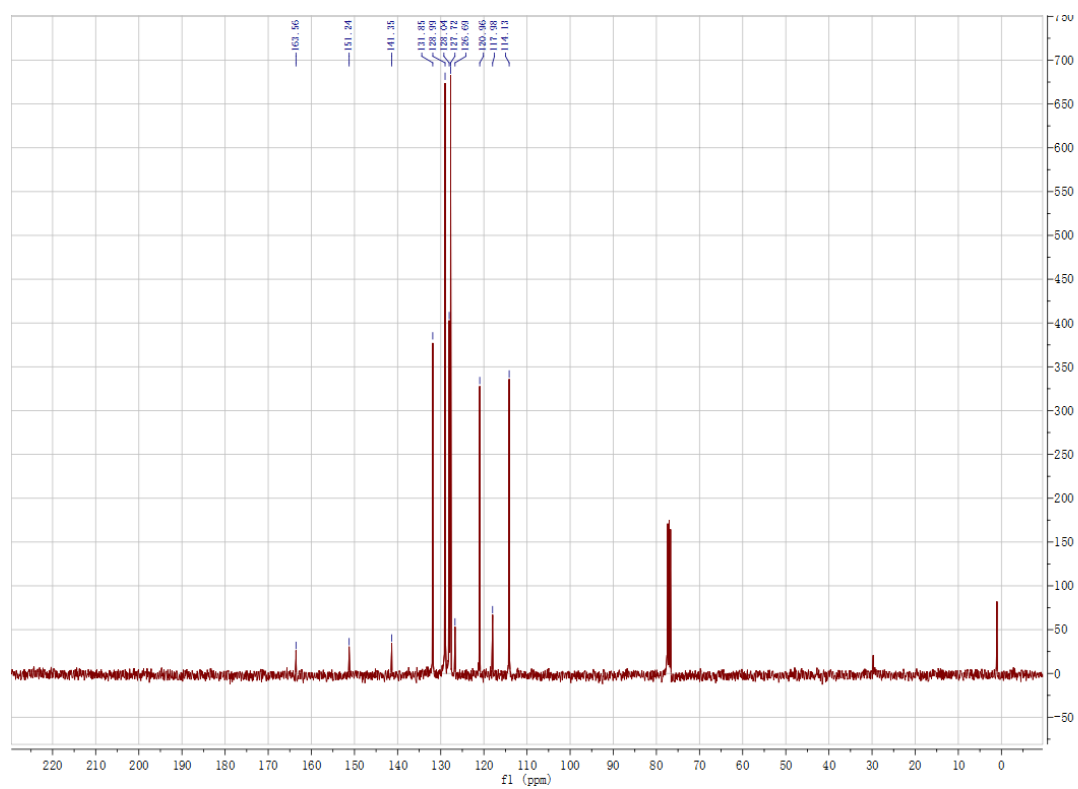

# 7-chloro-5-methyl-2-(o-tolyl)benzo[d]oxazole (7e)

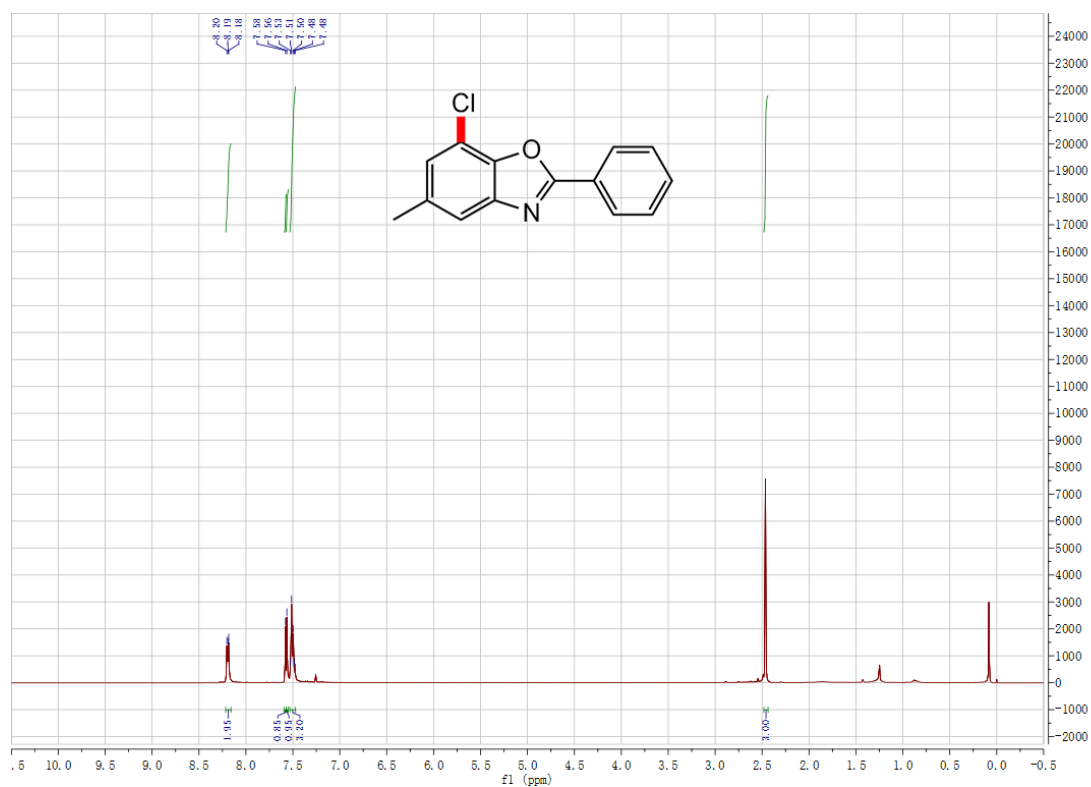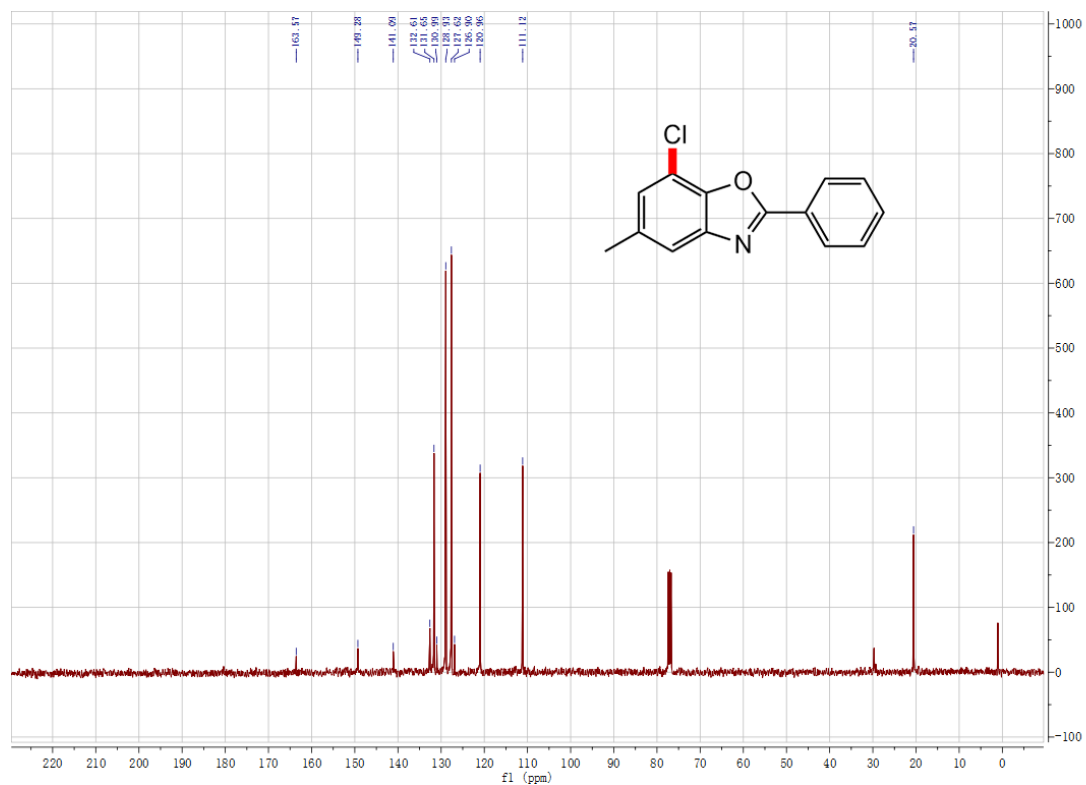

7-chloro-5-methyl-2-(p-tolyl)benzo[d]oxazole (7i)

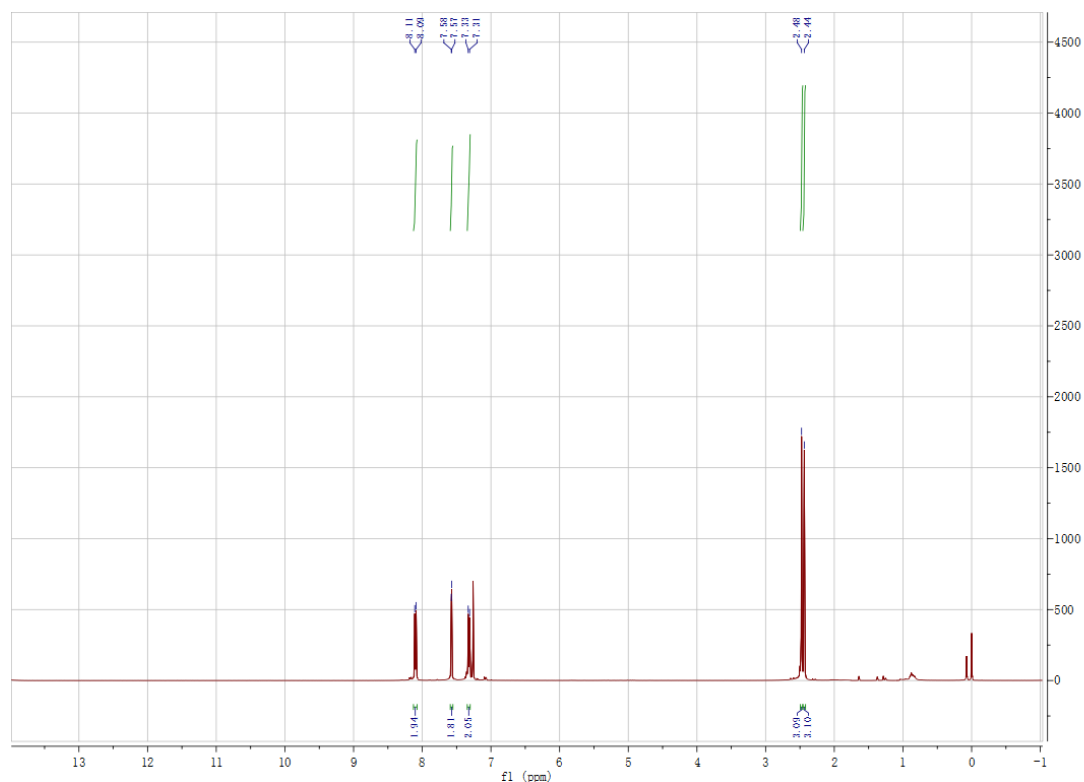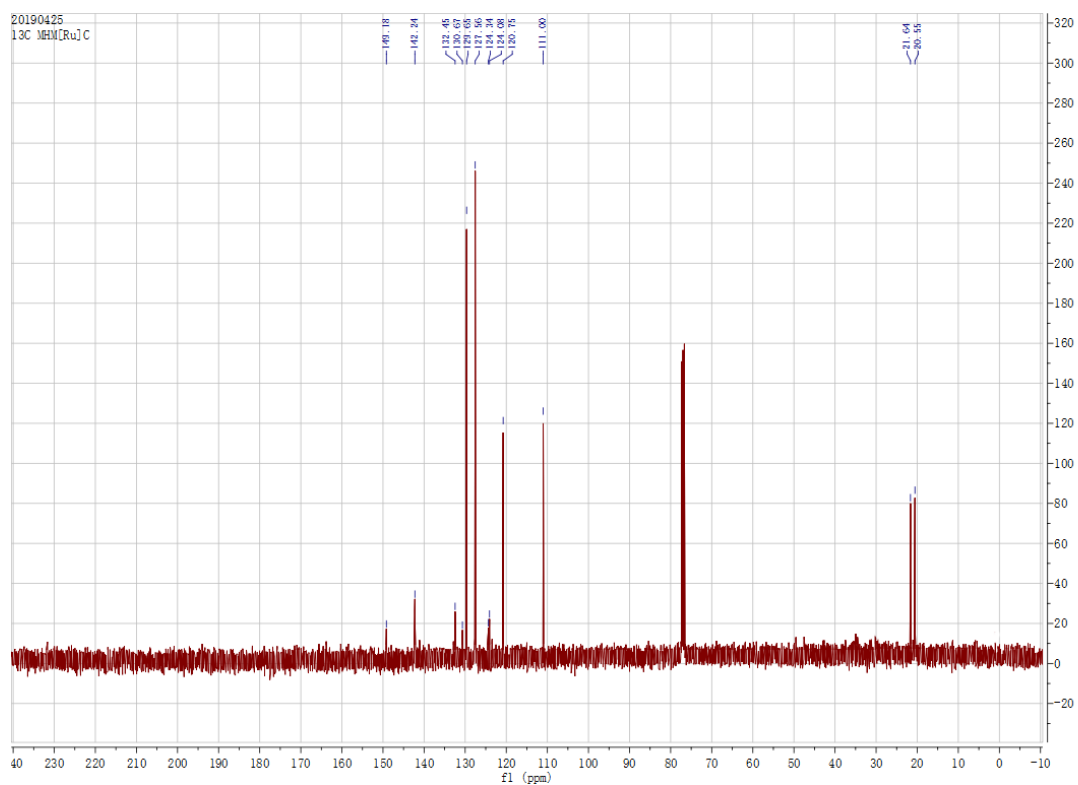

# 7-chloro-5-methyl-2-(m-tolyl)benzo[d]oxazole (7h)

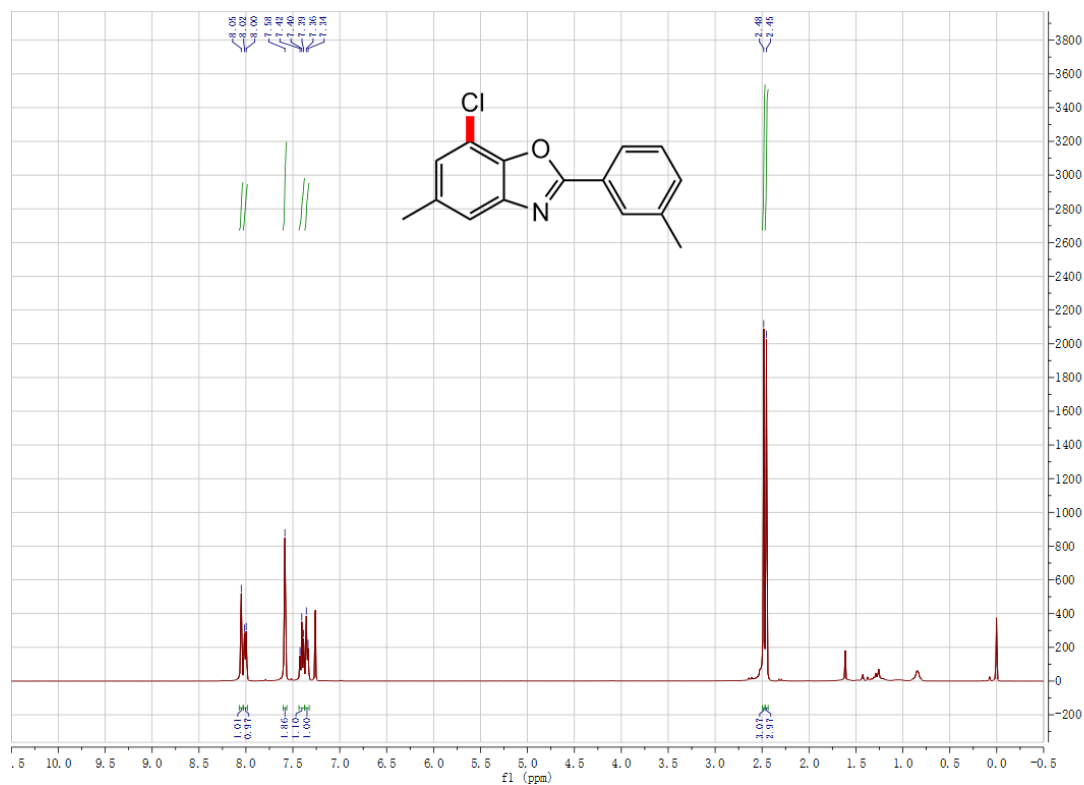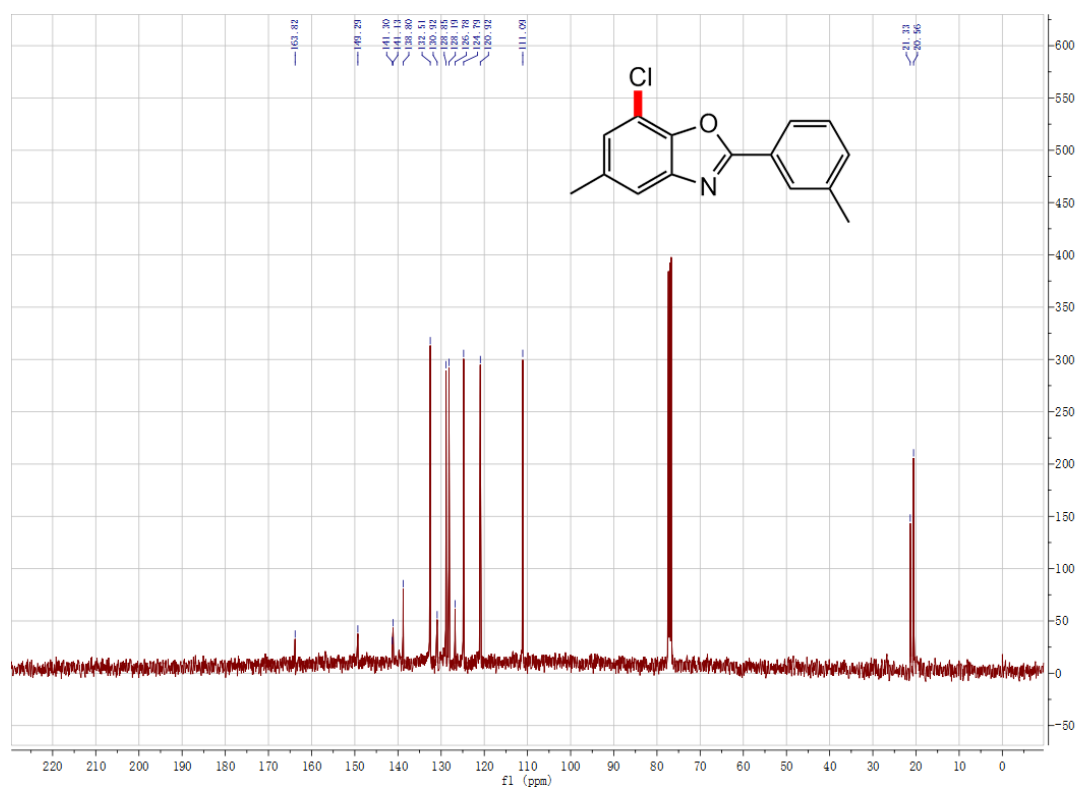

# 7-chloro-2-(4-fluorophenyl)-5-methylbenzo[d]oxazole (7k)

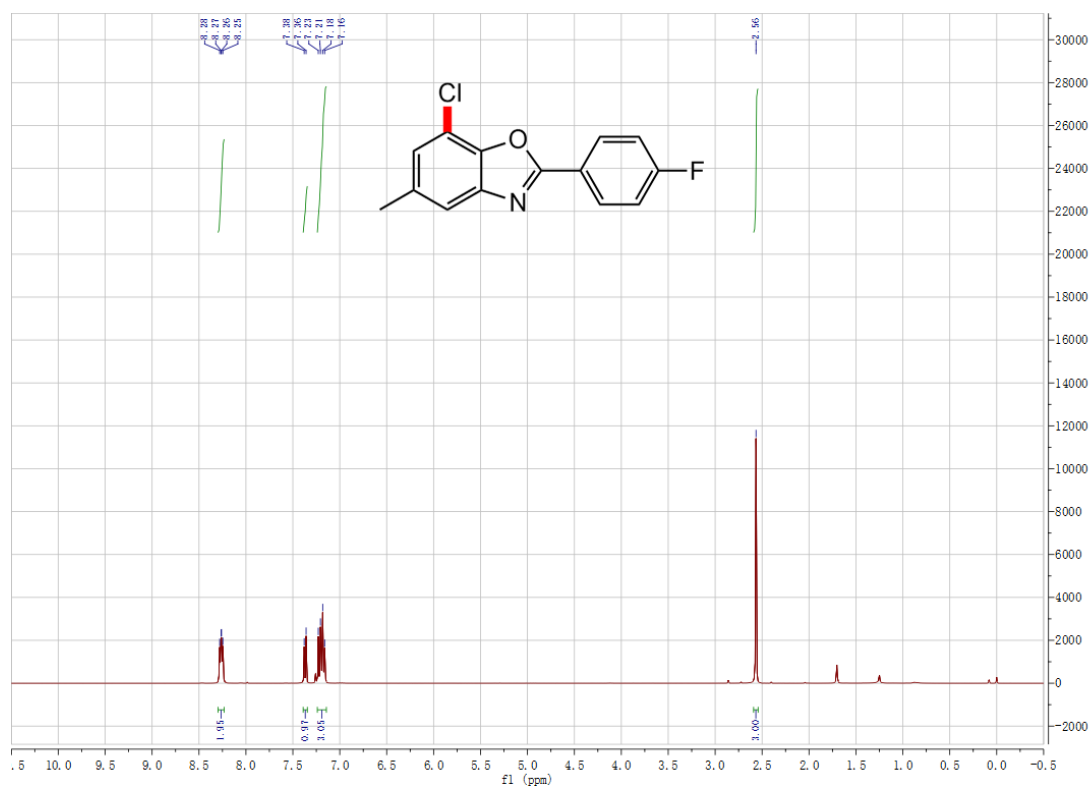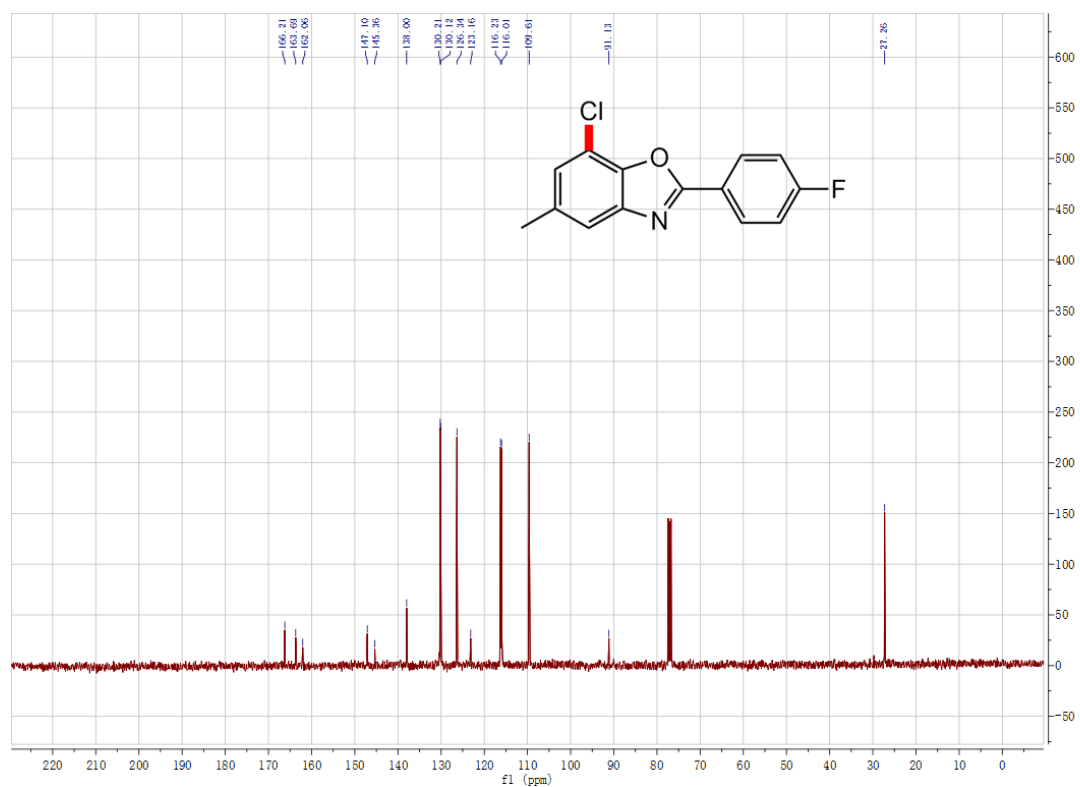





# 7-chloro-2-(4-methoxyphenyl)-5-methylbenzo[d]oxazole (7j)

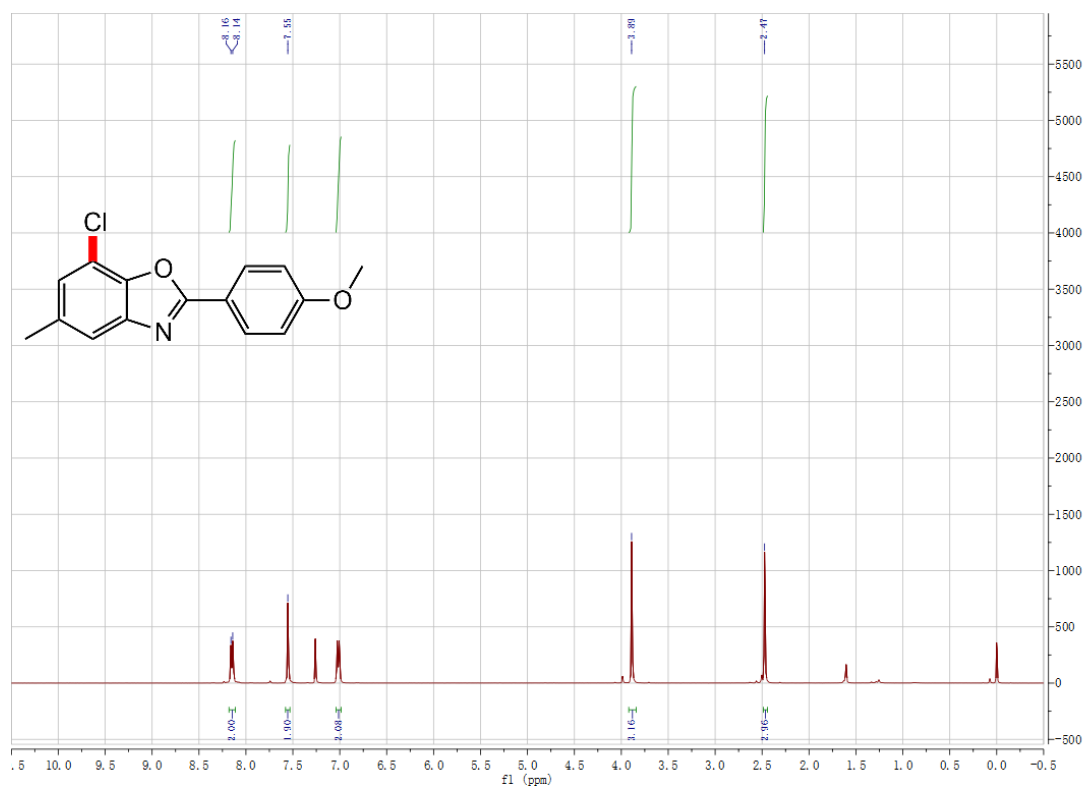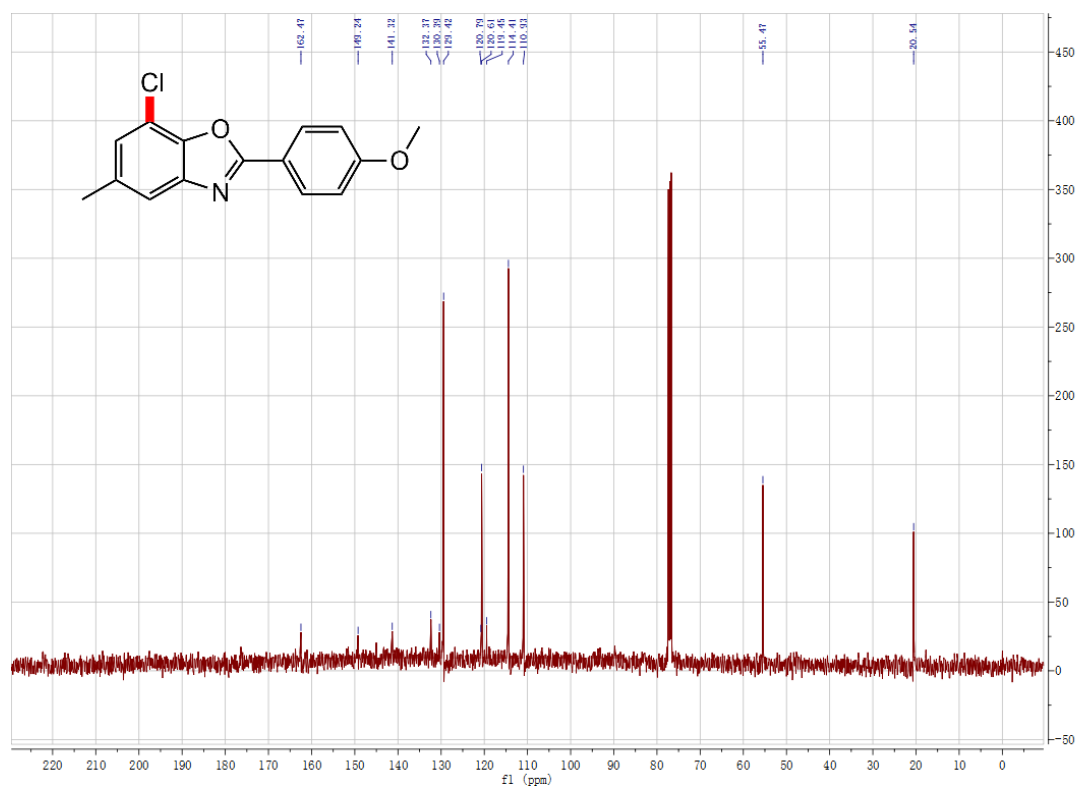

## 7. Reference

1. Data of known compounds were correspondence to: (a) Zhao, S.; Chen, Y.; Song, Y.-F.; Appl. Catal., A, 2014, 475, 140-146. (b) Dev, F.; Chandra, J.; Palakurthy, N. B.; Thalluri, K.; Kalita, T.; Mandal, B. Asian J. Org. Chem. 2016, 5, 663-675.
- 2 For examples, see: (a) Lane, B. S.; Brown, M. A.; Sames, D. J. Am. Chem. Soc. 2005, 127, 8050-8057. (b) Park, C. H.; Ryabova, V.; Seregin, I. V.; Sromek, A. W.; Gevorgyan, V. Org. Lett. 2004, 6, 1159-1162. (c) Lafrance, M.; Rowley, C. N.; Woo, T. K.; Fagnou, K. J. Am. Chem. Soc. 2006, 128, 8754-8756.
- 3 (a) Becke, A. D. *J. Chem. Phys.* **1993**, *98*, 5648-5652. (b) Stephens, P. J.; Devlin, F. J.; Chabalowski, C. F.; Frisch, M. J. *J. Phys. Chem.* **1994**, *98*, 11623-11627. (c) Lee, C.; Yang, W.; Parr, R. G. *Phys. Rev. B*, **1988**, *37*, 785-789.
- 4 Gaussian 09, Revision A.02, Frisch, M. J.; Trucks, G. W.; Schlegel, H. B.; Scuseria, G. E.; Robb, M. A.; Cheeseman, J. R.; Scalmani, G.; Barone, V.; Mennucci, B.; Petersson, G. A.; Nakatsuji, H.; Caricato, M.; Li, X.; Hratchian, H. P.; Izmaylov, A. F.; Bloino, J.; Zheng, G.; Sonnenberg, J. L.; Hada, M.; Ehara, M.; Toyota, K.; Fukuda, R.; Hasegawa, J.; Ishida, M.; Nakajima, T.; Honda, Y.; Kitao, O.; Nakai, H.; Vreven, T.; Montgomery, J. A.; Jr., .; Peralta, J. E.; Ogliaro, F.; Bearpark, M.; Heyd, J. J.; Brothers, E.; Kudin, K. N.; Staroverov, V. N.; Kobayashi, R.; Normand, J.; Raghavachari, K.; Rendell, A.; Burant, J. C.; Iyengar, S. S.; Tomasi, J.; Cossi, M.; Rega, N.; Millam, J. M.; Klene, M.; Knox, J. E.; Cross, J. B.; Bakken, V.; Adamo, C.; Jaramillo, J.; Gomperts, R.; Stratmann, R. E.; Yazyev, O.; Austin, A. J.; Cammi, R.; Pomelli, C.; Ochterski, J. W.; Martin, R. L.; Morokuma, K.; Zakrzewski, V. G.; Voth, G. A.; Salvador, P.; Dannenberg, J. J.; Dapprich, S.; Daniels, A. D.; Farkas, Ö.; Foresman, J. B.; Ortiz, J. V.; Cioslowski, J.; Fox, D. J. Gaussian, Inc., Wallingford CT, **2009**.
- 5 Hay, P. J.; Wadt, W. R. *J. Chem. Phys.*, **1985**, *82*, 270-283.
- 6 NBO 5.9. E. D. Glendening, J. K. Badenhoop, A. E. Reed, J. E. Carpenter, J. A. Bohmann, C. M. Morales, F. Weinhold, M. Morales, F. Weinhold. Theoretical Chemistry Institute, University of Wisconsin, Madison, **2010**.
- 7 Marenich, A. V.; Cramer, C. J.; Truhlar, D. G.; *J. Phys. Chem. B*, **2009**, *113*, 6378-6396.
- 8 (a) Parr, R. G.; Yang, W. Density Functional Theory of Atoms and Molecules; Oxford University Press: New York, 1999. (b) Yang, W.; Mortier, W. J. J. Am. Chem. Soc. 1986, 108, 5708.
- 9 (a) Chattaraj, P. K.; Sarkar, U.; Roy, D. R. *Chem. Rev.* **2006**, *106*, 2065-2091. (b) Ayers, P. W.; Parr, R. G. *J. Am. Chem. Soc.* **2000**, *122*, 2010-2018. (c) Pérez, P.; Toro-Labbé, A.; Aizman, A.; Contreras, R. *J. Org. Chem.* **2002**, *67*, 4747. (d) Pintér, B.; De Proft, F.; Veszprémi, T.; Geerlings, P. *J. Org. Chem.* **2008**, *73*, 1243-1252.
- 10 For examples, see: (a) Lane, B. S.; Brown, M. A.; Sames, D. *J. Am. Chem. Soc.* **2005**, *127*, 8050-8057. (b) Park, C. H.; Ryabova, V.; Seregin, I. V.; Sromek, A. W.; Gevorgyan, V. *Org. Lett.* **2004**, *6*, 1159-1162. (c) Lafrance, M.; Rowley, C. N.; Woo, T. K.; Fagnou, K. *J. Am. Chem. Soc.* **2006**, *128*, 8754-8756.
